# Supplementary material
Source: PubMed Central journal article supplement (PMC6641982)

Supporting Information

**Pd<sup>II</sup>-Catalyzed Enantioselective C(sp<sup>3</sup>)-H Activation/Cross-Coupling Reactions of Free Carboxylic Acids**

*Liang Hu, Peng-Xiang Shen, Qian Shao, Kai Hong, Jennifer X. Qiao, and Jin-Quan Yu\**

anie\_201813055\_sm\_miscellaneous\_information.pdf

## Table of Contents

|                                                                                   |    |
|-----------------------------------------------------------------------------------|----|
| 1. General Information.....                                                       | 2  |
| 2. Substrate Structures.....                                                      | 3  |
| 3. Experimental Section.....                                                      | 5  |
| 3.1 Preparation of Ligands.....                                                   | 5  |
| 3.2 Optimization of Conditions of Arylation for Cyclopropanecarboxylic Acid.....  | 11 |
| 3.3 Optimization of Conditions of Arylation for Cyclobutanecarboxylic Acid.....   | 13 |
| 3.4 Optimization of Conditions of Vinylation for Cyclopropanecarboxylic Acid..... | 14 |
| 3.5 Enantioselective Arylation of Cyclopropanecarboxylic Acid.....                | 16 |
| 3.6 Enantioselective Arylation of Cyclobutanecarboxylic Acid.....                 | 38 |
| 3.7 Enantioselective Vinylation of Cyclopropanecarboxylic Acid.....               | 63 |
| 3.8 Synthesis of Cis-Chiral Amine from Carboxylic Acid.....                       | 72 |
| 4. Reference.....                                                                 | 74 |
| 5. X-Ray Crystallographic Data of Compound.....                                   | 75 |
| 6. NMR Spectra.....                                                               | 77 |

## 1. General Information

Carboxylic acids were obtained from the commercial sources or synthesized following literature procedures. Alkyl iodides were obtained from the commercial sources. Solvents were obtained from Sigma-Aldrich, Oakwood and Acros and used directly without further purification. Analytical thin layer chromatography was performed on 0.25 mm silica gel 60-F254. Visualization was carried out with UV light and Bromocresol Green Stain.  $^1\text{H}$  NMR was recorded on Bruker DRX-600 instrument (600 MHz). Chemical shifts were quoted in parts per million (ppm) referenced to the literature values of tetramethylsilane. The following abbreviations (or combinations thereof) were used to explain multiplicities: s = singlet, d = doublet, t = triplet, q = quartet, p = pentet, m = multiplet, br = broad. Coupling constants,  $J$ , were reported in Hertz unit (Hz).  $^{13}\text{C}$  NMR spectra were recorded on Bruker DRX-600 instrument (150 MHz), and were fully decoupled by broad band proton decoupling. Chemical shifts were reported in ppm referenced to either the center line of a triplet at 77.0 ppm of chloroform- $d$  or the center line of a multiplet at 29.84 ppm of acetone- $d^6$ . High-resolution mass spectra (HRMS) were recorded on an Agilent Mass spectrometer using ESI-TOF (electrospray ionization-time of flight). Enantiomeric ratio (er) were determined on a Agilent SFC system or Waters SFC system using commercially available chiral columns.

## 2. Substrate Structures

Substrates **1a**, **1p**, **4a**, **4q**, **4u** were purchased from commercial sources. **1q-1u**, **4p**, **4r-4t** was synthesized from the reported procedure.<sup>1,5,14</sup>

### Arylboronic acid pinacol ester

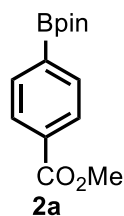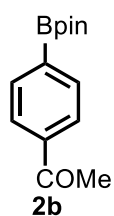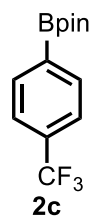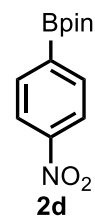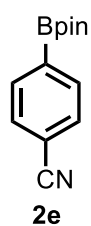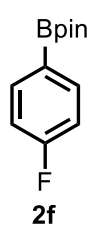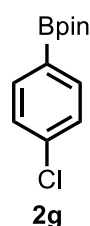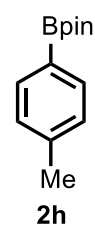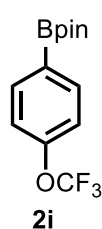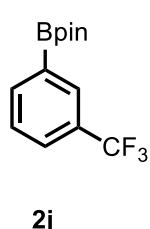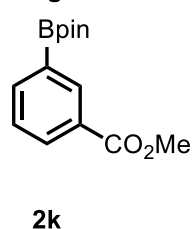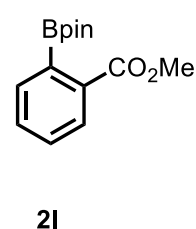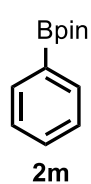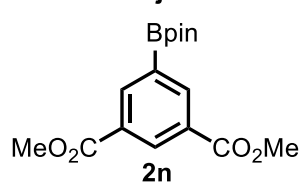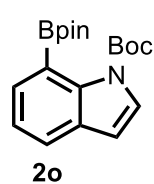

### Vinylboronic acid pinacol esters

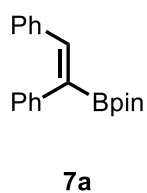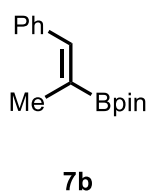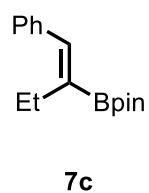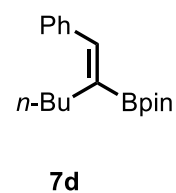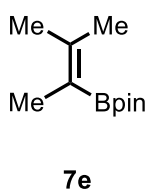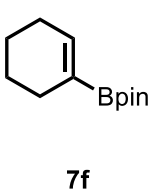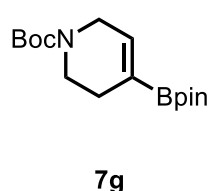

### $\alpha$ -Substituted cyclopropanecarboxylic acids

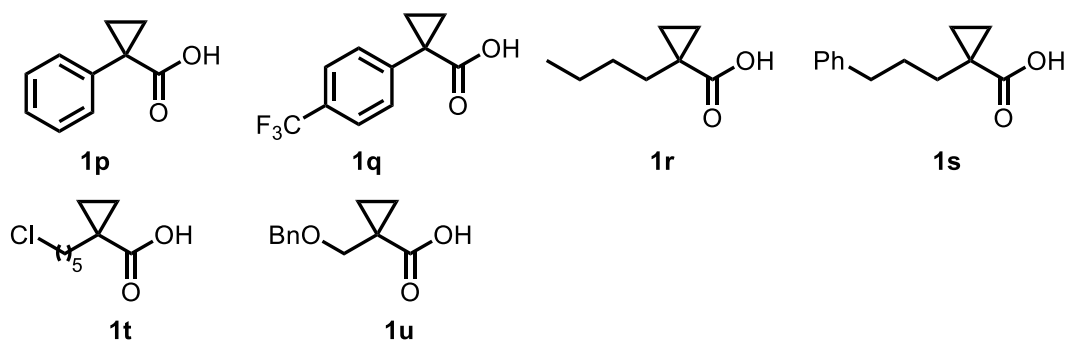

### $\alpha$ -Substituted cyclobutanecarboxylic acids

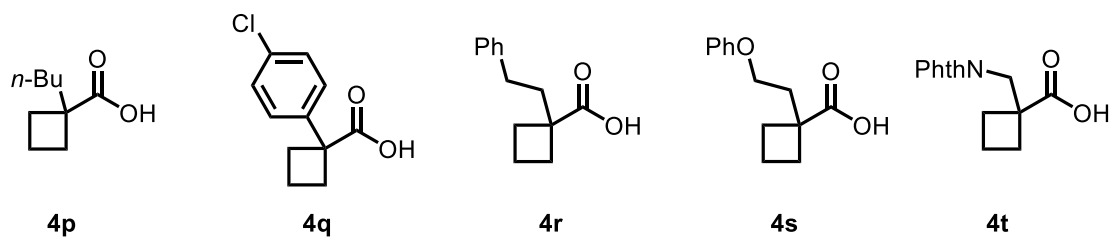

### Unsuccessful substrate

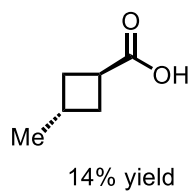

### 3. Experimental Section

#### 3.1.1 General Procedure for the Preparation of Ligands L20-28

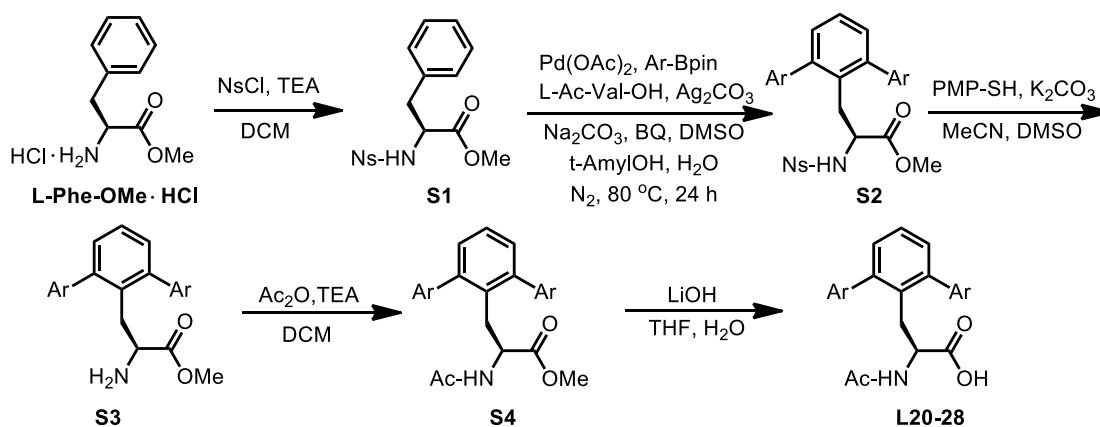

4-Nitrobenzenesulfonyl chloride (NsCl, 50 mmol, 1.0 equiv) was added to a cooled (0 °C) solution of L-phenylalanine methyl ester hydrochloride (L-Phe-OMe·HCl, 50 mmol, 1.0 equiv) and triethylamine (TEA, 150 mmol, 3.0 equiv) in DCM (150 mL). After being stirred at room temperature for 12 h, the reaction mixture was poured into H<sub>2</sub>O. The organic layer was separated, dried over anhydrous Na<sub>2</sub>SO<sub>4</sub>, filtered and concentrated under vacuum. The residue was purified by trituration with a mixture of 50% DCM/hexane to give **S1**.

**S1** (8.0 mmol, 1.0 equiv), Pd(OAc)<sub>2</sub> (0.075 equiv), Ar-BPin (2.0 equiv), L-Ac-Val-OH (0.2 equiv), Ag<sub>2</sub>CO<sub>3</sub> (2.0 equiv), Na<sub>2</sub>CO<sub>3</sub> (2.0 equiv), BQ (0.5 equiv), H<sub>2</sub>O (5.0 equiv), and DMSO (0.4 equiv) were weighed in air and placed in a Schlenk tube with a magnetic stir bar. *t*-AmylOH (50 mL) was added, and the reaction vessel was evacuated and backfilled with nitrogen (×3). The reaction mixture was heated to 80 °C for 24 h under vigorous stirring. After being cooled to room temperature, the reaction mixture was diluted with EtOAc and filtered through a pad of Celite eluting with EtOAc. The filtrate was concentrated under vacuum and the resulting residue was purified by flash chromatography on silica gel (eluent: EtOAc/hexane = 1: 3) to give **S2**.

4-Methoxybenzenethiol (PMP-SH, 20.0 mmol, 4.0 equiv) and potassium carbonate (20.0 mmol, 4.0 equiv) were added to a solution of **S2** (5.0 mmol, 1.0 equiv) in MeCN (40 mL) and DMSO (1.5 mL). After being stirred at room temperature for 12 h, the reaction mixture was diluted with EtOAc, washed with H<sub>2</sub>O and brine, dried over anhydrous Na<sub>2</sub>SO<sub>4</sub>, filtered, and concentrated under vacuum. The residue was purified by column chromatography on silica gel (eluent: EtOAc/hexane = 1: 1) to give **S3**.

Ac<sub>2</sub>O (12.0 mmol, 3.0 equiv) was added to a solution of **S3** (4.0 mmol, 1.0 equiv) and triethylamine (12.0 mmol, 3.0 equiv) in DCM (20 mL). After being stirred at room temperature for 3 h, the reaction mixture was quenched with saturated NH<sub>4</sub>Cl solution and extracted with DCM. The combined organic layers were dried over anhydrous Na<sub>2</sub>SO<sub>4</sub>, filtered and concentrated to give **S4**, which could be used directly in the next step without further purification.

LiOH (8.0 mmol) was added to a suspension of **S4** in THF (8 mL), and H<sub>2</sub>O (4 mL) at 0 °C. The reaction mixture was allowed to warm to room temperature and stirred for 8 h. The reaction mixture was quenched with 10% aqueous citric acid solution and extracted EtOAc (3

x 20 mL). The combined organic layers were washed with brine, dried over anhydrous  $\text{Na}_2\text{SO}_4$ , filtered and concentrated to give the desired ligand, further purification could be conducted by recrystallization or reversed phase flash column.

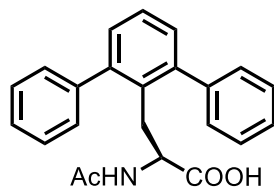

**(S)-3-([1,1':3',1''-terphenyl]-2'-yl)-2-acetamidopropanoic acid (L20)**

$^1\text{H}$  NMR (600 MHz,  $\text{DMSO}-d_6$ )  $\delta$  11.92 (s, 1H), 7.47 – 7.40 (m, 4H), 7.39 – 7.33 (m, 7H), 7.30 (t,  $J = 7.6$  Hz, 1H), 7.11 (d,  $J = 7.6$  Hz, 2H), 3.66 (q,  $J = 7.7$  Hz, 1H), 3.13 (dd,  $J = 14.1$ , 7.5 Hz, 1H), 3.01 (dd,  $J = 14.1$ , 8.1 Hz, 1H), 1.55 (s, 3H);  $^{13}\text{C}$  NMR (150 MHz,  $\text{DMSO}-d_6$ )  $\delta$  172.52, 168.26, 143.23, 141.67, 132.30, 129.32, 129.21, 128.19, 126.91, 126.13, 51.59, 31.04, 22.12.

HRMS (ESI-TOF)  $m/z$  Calcd for  $\text{C}_{23}\text{H}_{22}\text{NO}_3^+$   $[\text{M}+\text{H}]^+$  360.1600, found 360.1601.

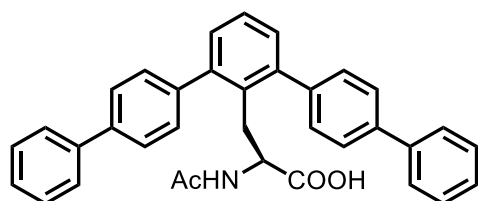

**(S)-3-([1,1':4',1'':3'',1''':4''',1''''-quinquephenyl]-2'-yl)-2-acetamidopropanoic acid (L21)**

$^1\text{H}$  NMR (600 MHz,  $\text{DMSO}-d_6$ )  $\delta$  11.99 (s, 1H), 7.83 – 7.66 (m, 8H), 7.53 – 7.45 (m, 9H), 7.41 – 7.37 (m, 2H), 7.35 (t,  $J = 7.6$  Hz, 1H), 7.19 (d,  $J = 7.6$  Hz, 2H), 3.80 (q,  $J = 7.7$  Hz, 1H), 3.26 (dd,  $J = 14.1$ , 7.4 Hz, 1H), 3.11 (dd,  $J = 14.1$ , 8.2 Hz, 1H), 1.56 (s, 3H);  $^{13}\text{C}$  NMR (150 MHz,  $\text{DMSO}-d_6$ )  $\delta$  172.60, 168.32, 142.90, 140.87, 139.72, 138.49, 132.51, 129.89, 129.41, 128.99, 127.47, 126.57, 126.41, 126.29, 51.64, 31.33, 22.15.

HRMS (ESI-TOF)  $m/z$  Calcd for  $\text{C}_{35}\text{H}_{30}\text{NO}_3^+$   $[\text{M}+\text{H}]^+$  512.2226, found 512.2228.

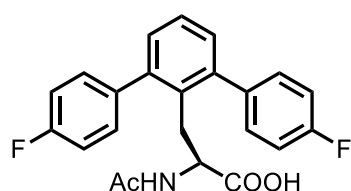

**(S)-2-acetamido-3-(4,4''-difluoro-[1,1':3',1''-terphenyl]-2'-yl)propanoic acid (L22)**

$^1\text{H}$  NMR (600 MHz,  $\text{DMSO}-d_6$ )  $\delta$  12.02 (s, 1H), 7.50 (d,  $J = 8.0$  Hz, 1H), 7.40 – 7.36 (m, 4H), 7.30 (t,  $J = 7.6$  Hz, 1H), 7.25 (d,  $J = 8.8$  Hz, 4H), 7.12 (d,  $J = 7.6$  Hz, 2H), 3.70 (q,  $J = 7.8$  Hz, 1H), 3.11 (dd,  $J = 14.1$ , 7.3 Hz, 1H), 2.96 (dd,  $J = 14.2$ , 8.2 Hz, 1H), 1.57 (s, 3H);  $^{13}\text{C}$  NMR (150 MHz,  $\text{DMSO}-d_6$ )  $\delta$  172.51, 168.32, 161.34 (d,  $J = 241.5$  Hz), 42.21, 137.87 (d,  $J = 3.0$  Hz), 132.75, 131.20 (d,  $J = 9.0$  Hz), 129.52, 126.22, 115.03 (d,  $J = 21.0$  Hz), 51.36, 31.21, 22.15;  $^{19}\text{F}$  NMR (376 MHz,  $\text{DMSO}$ )  $\delta$  -116.14.

HRMS (ESI-TOF)  $m/z$  Calcd for  $\text{C}_{23}\text{H}_{20}\text{F}_2\text{NO}_3^+$   $[\text{M}+\text{H}]^+$  369.1411, found 369.1409.

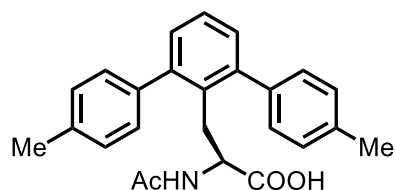

**(S)-2-acetamido-3-(4,4''-dimethyl-[1,1':3',1''-terphenyl]-2'-yl)propanoic acid (L23)**

$^1\text{H NMR}$  (600 MHz,  $\text{DMSO-}d_6$ )  $\delta$  11.92 (s, 1H), 7.33 (d,  $J = 7.6$  Hz, 1H), 7.23 (s, 9H), 7.06 (d,  $J = 7.6$  Hz, 2H), 3.69 (q,  $J = 7.8$  Hz, 1H), 3.14 (dd,  $J = 14.0, 7.5$  Hz, 1H), 3.04 – 2.99 (m, 1H), 2.35 (s, 6H), 1.56 (s, 3H);  $^{13}\text{C NMR}$  (150 MHz,  $\text{DMSO-}d_6$ )  $\delta$  172.57, 168.34, 143.20, 138.87, 135.86, 132.34, 129.25, 129.11, 128.80, 126.06, 51.62, 31.06, 22.14, 20.80.

HRMS (ESI-TOF)  $m/z$  Calcd for  $\text{C}_{25}\text{H}_{26}\text{NO}_3^+$   $[\text{M}+\text{H}]^+$  388.1913, found 388.1914.

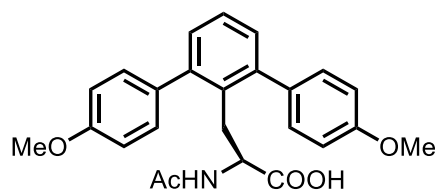

**(S)-2-acetamido-3-(4,4''-dimethoxy-[1,1':3',1''-terphenyl]-2'-yl)propanoic acid (L24)**

$^1\text{H NMR}$  (600 MHz,  $\text{DMSO-}d_6$ )  $\delta$  11.93 (s, 1H), 7.32 (d,  $J = 7.6$  Hz, 1H), 7.29 – 7.26 (m, 4H), 7.24 (d,  $J = 7.6$  Hz, 1H), 7.06 (d,  $J = 7.5$  Hz, 2H), 7.00 – 6.96 (m, 4H), 3.79 (s, 6H), 3.70 (q,  $J = 7.7$  Hz, 1H), 3.15 (dd,  $J = 14.0, 7.3$  Hz, 1H), 3.01 (dd,  $J = 14.0, 8.4$  Hz, 1H), 1.57 (s, 3H);  $^{13}\text{C NMR}$  (150 MHz,  $\text{DMSO-}d_6$ )  $\delta$  172.63, 168.30, 158.12, 142.91, 134.05, 132.71, 130.32, 129.25, 126.01, 113.62, 55.06, 51.57, 31.12, 22.17.

HRMS (ESI-TOF)  $m/z$  Calcd for  $\text{C}_{25}\text{H}_{26}\text{NO}_5^+$   $[\text{M}+\text{H}]^+$  420.1811, found 420.1818.

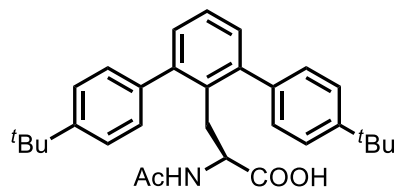

**(S)-2-acetamido-3-(4,4''-di-tert-butyl-[1,1':3',1''-terphenyl]-2'-yl)propanoic acid (L25)**

$^1\text{H NMR}$  (600 MHz,  $\text{DMSO-}d_6$ )  $\delta$  11.89 (s, 1H), 7.46 – 7.41 (m, 4H), 7.35 (d,  $J = 7.4$  Hz, 1H), 7.30 – 7.26 (m, 5H), 7.09 (d,  $J = 7.6$  Hz, 2H), 3.65 (q,  $J = 7.6$  Hz, 1H), 3.14 (dd,  $J = 14.1, 7.6$  Hz, 1H), 3.00 (dd,  $J = 14.1, 7.7$  Hz, 1H), 1.54 (s, 3H), 1.32 (s, 18H);  $^{13}\text{C NMR}$  (150 MHz,  $\text{DMSO-}d_6$ )  $\delta$  172.75, 168.09, 149.01, 143.09, 138.81, 132.59, 129.26, 128.88, 126.08, 124.92, 51.63, 40.07, 34.25, 31.19, 22.11.

HRMS (ESI-TOF)  $m/z$  Calcd for  $\text{C}_{31}\text{H}_{38}\text{NO}_3^+$   $[\text{M}+\text{H}]^+$  472.2852, found 472.2847.

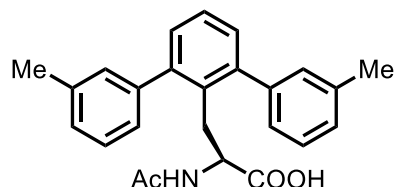

**(S)-2-acetamido-3-(3,3''-dimethyl-[1,1':3',1''-terphenyl]-2'-yl)propanoic acid (L26)**

$^1\text{H NMR}$  (600 MHz,  $\text{DMSO-}d_6$ )  $\delta$  11.93 (s, 1H), 7.36 – 7.26 (m, 4H), 7.18 – 7.12 (m, 6H), 7.08 (d,  $J = 7.6$  Hz, 2H), 3.70 (q,  $J = 7.7$  Hz, 1H), 3.13 (dd,  $J = 14.0, 7.3$  Hz, 1H), 2.99 (dd,  $J = 14.1, 8.2$  Hz, 1H), 2.35 (s, 6H), 1.56 (s, 3H);  $^{13}\text{C NMR}$  (150 MHz,  $\text{DMSO-}d_6$ )  $\delta$  172.59,



168.27, 143.28, 141.66, 137.19, 132.31, 129.86, 129.18, 128.06, 127.53, 126.29, 125.99, 51.72, 31.13, 22.14, 21.13.

HRMS (ESI-TOF)  $m/z$  Calcd for  $C_{25}H_{26}NO_3^+$   $[M+H]^+$  388.1913, found 388.1914.

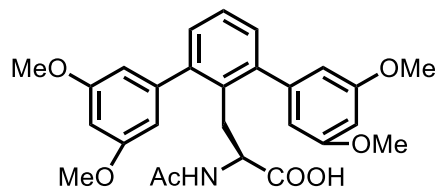

**(S)-2-acetamido-3-(3,3',5,5''-tetramethoxy-[1,1':3',1''-terphenyl]-2'-yl)propanoic acid (L27)**

$^1H$  NMR (600 MHz,  $DMSO-d_6$ )  $\delta$  11.99 (s, 1H), 7.40 (d,  $J = 7.7$  Hz, 1H), 7.26 (dd,  $J = 7.9, 7.2$  Hz, 1H), 7.11 (d,  $J = 7.6$  Hz, 2H), 6.50 – 6.48 (m, 6H), 3.89 – 3.84 (m, 1H), 3.77 (s, 12H), 3.20 (dd,  $J = 14.1, 7.1$  Hz, 1H), 3.04 (dd,  $J = 14.1, 8.6$  Hz, 1H), 1.60 (s, 3H);  $^{13}C$  NMR (150 MHz,  $DMSO-d_6$ )  $\delta$  172.70, 168.39, 160.07, 143.63, 143.08, 132.32, 129.06, 125.91, 107.48, 99.05, 55.21, 51.62, 31.36, 22.15.

HRMS (ESI-TOF)  $m/z$  Calcd for  $C_{27}H_{30}NO_7^+$   $[M+H]^+$  480.2022, found 480.2026.

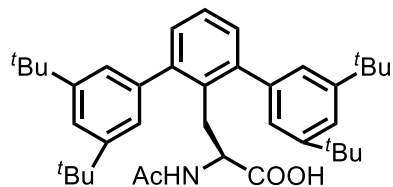

**(S)-2-acetamido-3-(3,3',5,5''-tetra-tert-butyl-[1,1':3',1''-terphenyl]-2'-yl)propanoic acid (L28)**

$^1H$  NMR (600 MHz,  $CDCl_3$ )  $\delta$  7.44 (t,  $J = 1.8$  Hz, 2H), 7.35 (dd,  $J = 8.1, 7.0$  Hz, 1H), 7.28 – 7.26 (m, 2H), 7.21 (d,  $J = 1.9$  Hz, 4H), 5.12 (d,  $J = 7.2$  Hz, 1H), 4.07 (ddd,  $J = 11.9, 7.1, 3.4$  Hz, 1H), 3.28 (dd,  $J = 14.6, 3.5$  Hz, 1H), 3.14 (dd,  $J = 14.6, 11.8$  Hz, 1H), 1.75 (s, 3H), 1.36 (s, 36H);  $^{13}C$  NMR (150 MHz,  $CDCl_3$ )  $\delta$  172.81, 170.97, 150.76, 143.93, 140.08, 130.99, 129.35, 126.32, 120.92, 52.75, 34.54, 31.06, 29.33, 22.44.

HRMS (ESI-TOF)  $m/z$  Calcd for  $C_{39}H_{54}NO_3^+$   $[M+H]^+$  584.4104, found 584.4114.

**3.1.2 General Procedure for the Preparation of Ligands L36-39**

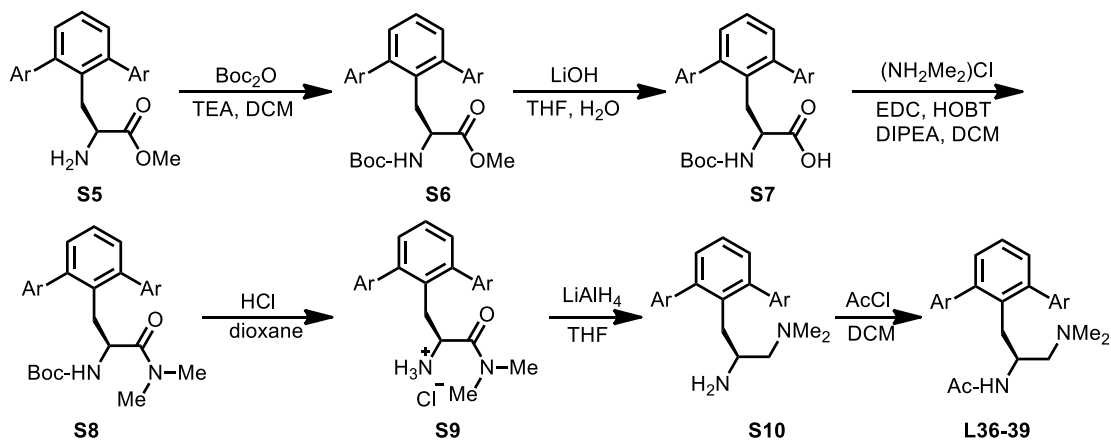

$Boc_2O$  (8.0 mmol, 2.0 equiv) was added to a solution of **S5** (4.0 mmol, 1.0 equiv) and triethylamine (8.0 mmol, 2.0 equiv) in DCM (20 mL). After being stirred at room temperature for 3 h, the reaction mixture was quenched with saturated  $NH_4Cl$  solution and extracted with

DCM. The combined organic layers were dried over anhydrous  $\text{Na}_2\text{SO}_4$ , filtered and concentrated to give **S6**, which could be used directly in the next step without further purification.

$\text{LiOH}$  (8.0 mmol) was added to a suspension of **S6** in THF (8 mL), and  $\text{H}_2\text{O}$  (4 mL) at 0 °C. The reaction mixture was allowed to warm to room temperature and stirred for 8 h. The reaction mixture was quenched with 10% aqueous citric acid solution and extracted EtOAc (3 x 20 mL). The combined organic layers were washed with brine, dried over anhydrous  $\text{Na}_2\text{SO}_4$ , filtered and concentrated to give **S7**, further purification could be conducted by recrystallization or reversed phase flash column.

The corresponding Boc-protected amino acid (**S7**) (4 mmol), dimethylammonium chloride (8.8 mmol, 2.2 equiv) and benzotriazol-1-ol hydrate (HOBt) (4 mmol, 1.0 equiv) were added to a round bottom flask equipped with a magnetic stir bar. The solid mixture was dissolved in DCM (40 mL), and 1-ethyl-(3-(3-dimethylamino)propyl)-carbodiimide hydrochloride (EDC) (4.8 mmol, 1.2 equiv) was added at 0 °C. The resulting solution was stirred at 0 °C as N-ethyl-N,N-diisopropylamine (DIPEA) (9.6 mmol, 2.4 equiv) was added slowly. The reaction solution was allowed to warm to r.t. and stirred for about 3 h, after which the solution was poured into a separatory funnel, diluted to 150 mL with additional DCM, and washed with approximately 25 mL of 10% w/w aqueous citric acid. The organic layer was separated and subsequently washed with 25 mL each of saturated aqueous  $\text{NaHCO}_3$  and brine. The organics were dried over anhydrous  $\text{Na}_2\text{SO}_4$ , filtered, and concentrated in vacuo to provide corresponding amide (**S8**) which could be directly used in the next step without further purification.

To the Boc-protected amino amide (**S8**) was added 4 N HCl/dioxane solution (4 ml). The resulting solution was stirred at room temperature for 2 h. Then, the volatile components were evaporated in vacuo, and the residue was subsequently used in the following reduction step.

To a solution of **S9** in THF (24 ml) was added a solution of  $\text{LiAlH}_4$  in THF (6.0 mmol, 1.5 equiv) dropwise under  $\text{N}_2$  at 0 °C. Then, the mixture was heated to reflux for 12 h, before being cooled down and diluted with ether. The mixture was cooled to 0 °C, and 0.28 ml of water was added slowly followed by 15% w/w NaOH aqueous solution (0.28 ml) and water (0.84 ml). The resulting suspension was then warmed to room temperature and stirred for 15 min before  $\text{MgSO}_4$  was added. The mixture was stirred for additional 15 min before filtration. The filtrate was collected, and the solvent was removed in vacuo to provide diamine compound (**S10**) which could be used in next step without purification.

To a solution of the synthesized diamine compound (**S10**) in DCM (8 ml) was added acetyl chloride (8 mmol, 2.0 equiv) at 0 °C. Then the solution was stirred at room temperature for 2 h. The volatile components were evaporated in vacuo, and the residue was dissolved in 8 ml of water. The resulting solution was extracted with ether (10 ml x 3), then the aqueous phase was alkalinized with 15% w/w NaOH aqueous solution until  $\text{pH} > 13$ . The alkalinized mixture was extracted with ether (10 ml x 3), and the organic layers were concentrated to provide the desired MPAAM Ligand. Further purification could be conducted by recrystallization or reversed phase flash column.

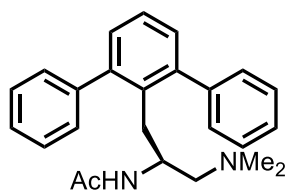

**(S)-N-(1-([1,1':3',1''-terphenyl]-2'-yl)-3-(dimethylamino)propan-2-yl)acetamide (L36)**

$^1\text{H}$  NMR (600 MHz,  $\text{CDCl}_3$ )  $\delta$  7.46 – 7.40 (m, 8H), 7.38 – 7.35 (m, 2H), 7.29 – 7.27 (m, 1H), 7.20 – 7.17 (m, 2H), 4.60 (d,  $J = 8.7$  Hz, 1H), 3.74 (dd,  $J = 10.0, 5.8$  Hz, 1H), 3.12 (dd,  $J = 14.2, 4.2$  Hz, 1H), 2.80 (dd,  $J = 14.2, 10.7$  Hz, 1H), 1.85 (dd,  $J = 12.0, 7.0$  Hz, 1H), 1.72 (s, 6H), 1.69 (s, 3H), 1.61 (dd,  $J = 12.0, 7.8$  Hz, 1H);  $^{13}\text{C}$  NMR (150 MHz,  $\text{CDCl}_3$ )  $\delta$  169.00, 143.33, 142.40, 133.44, 129.76, 129.59, 128.36, 127.02, 126.03, 63.99, 48.06, 45.20, 32.38, 23.41.

HRMS (ESI-TOF)  $m/z$  Calcd for  $\text{C}_{25}\text{H}_{29}\text{N}_2\text{O}^+$   $[\text{M}+\text{H}]^+$  373.2280, found 373.2282.

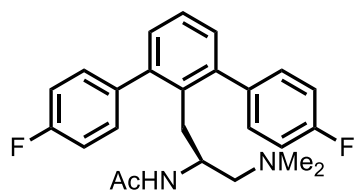

**(S)-N-(1-(4,4''-difluoro-[1,1':3',1''-terphenyl]-2'-yl)-3-(dimethylamino)propan-2-yl)acetamide (L37)**

$^1\text{H}$  NMR (600 MHz,  $\text{CDCl}_3$ )  $\delta$  7.37 (dd,  $J = 8.5, 5.5$  Hz, 4H), 7.29 – 7.27 (m, 1H), 7.17 – 7.12 (m, 5H), 4.74 (d,  $J = 8.8$  Hz, 1H), 3.78 – 3.71 (m, 1H), 3.03 (dd,  $J = 14.2, 4.2$  Hz, 1H), 2.77 (dd,  $J = 14.2, 10.4$  Hz, 1H), 1.92 (dd,  $J = 12.1, 7.5$  Hz, 1H), 1.80 (s, 6H), 1.70 (s, 3H), 1.67 – 1.62 (m, 1H);  $^{13}\text{C}$  NMR (150 MHz,  $\text{CDCl}_3$ )  $\delta$  169.05, 162.04 (d,  $J = 246.0$  Hz), 142.36, 138.22 (d,  $J = 3.0$  Hz), 133.58, 131.27 (d,  $J = 7.5$  Hz), 129.86, 126.19, 115.27 (d,  $J = 21.0$  Hz), 63.66, 47.68, 45.05, 32.71, 23.34;  $^{19}\text{F}$  NMR (376 MHz,  $\text{CDCl}_3$ )  $\delta$  -115.70.

HRMS (ESI-TOF)  $m/z$  Calcd for  $\text{C}_{25}\text{H}_{26}\text{F}_2\text{N}_2\text{O}^+$   $[\text{M}+\text{H}]^+$  409.2091, found 409.2096.

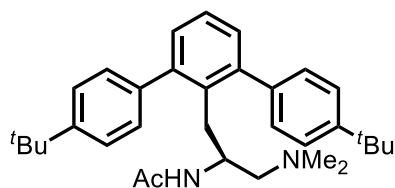

**(S)-N-(1-(4,4''-di-tert-butyl-[1,1':3',1''-terphenyl]-2'-yl)-3-(dimethylamino)propan-2-yl)acetamide (L38)**

$^1\text{H}$  NMR (600 MHz,  $\text{CDCl}_3$ )  $\delta$  7.48 – 7.44 (m, 4H), 7.36 – 7.32 (m, 4H), 7.25 – 7.23 (m, 1H), 7.18 – 7.15 (m, 2H), 4.59 (d,  $J = 9.0$  Hz, 1H), 3.80 – 3.72 (m, 1H), 3.22 (dd,  $J = 14.2, 3.4$  Hz, 1H), 2.70 (dd,  $J = 14.3, 11.2$  Hz, 1H), 1.89 (dd,  $J = 11.9, 6.3$  Hz, 1H), 1.69 (s, 6H), 1.68 (s, 3H), 1.65 – 1.60 (m, 1H), 1.37 (s, 18H);  $^{13}\text{C}$  NMR (150 MHz,  $\text{CDCl}_3$ )  $\delta$  168.50, 149.38, 142.77, 138.97, 133.30, 129.10, 129.00, 125.52, 124.83, 63.89, 47.81, 44.79, 34.12, 31.64, 30.96, 22.97.

HRMS (ESI-TOF)  $m/z$  Calcd for  $\text{C}_{33}\text{H}_{45}\text{N}_2\text{O}^+$   $[\text{M}+\text{H}]^+$  485.3532, found 485.3529.

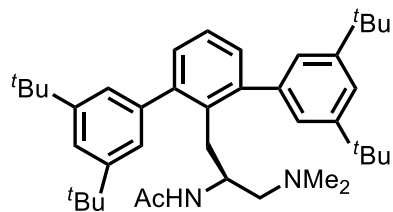

**(S)-N-(1-(dimethylamino)-3-(3,3',5,5'-tetra-tert-butyl-[1,1':3',1''-terphenyl]-2'-yl)propa-2-yl)acetamide (L39)**

<sup>1</sup>H NMR (600 MHz, CDCl<sub>3</sub>) δ 7.42 (t, *J* = 1.8 Hz, 2H), 7.30 – 7.26 (m, 5H), 7.20 (d, *J* = 7.5 Hz, 2H), 4.72 (d, *J* = 9.2 Hz, 1H), 3.87 – 3.81 (m, 1H), 3.14 (dd, *J* = 14.2, 3.8 Hz, 1H), 2.80 (dd, *J* = 14.1, 11.1 Hz, 1H), 1.93 (d, *J* = 7.0 Hz, 1H), 1.72 (s, 6H), 1.69 (s, 3H), 1.66 – 1.62 (m, 1H), 1.38 (s, 36H); <sup>13</sup>C NMR (150 MHz, CDCl<sub>3</sub>) δ 168.91, 150.86, 150.71, 144.30, 141.51, 133.34, 129.63, 125.94, 120.89, 64.25, 47.49, 45.04, 34.97, 32.40, 31.58, 23.52.

HRMS (ESI-TOF) *m/z* Calcd for C<sub>41</sub>H<sub>61</sub>N<sub>2</sub>O<sup>+</sup> [M+H]<sup>+</sup> 597.4784, found 597.4791.

**3.2 Optimization of Conditions of Arylation for Cyclopropanecarboxylic Acid**

Screening of Ligands<sup>a,b</sup>

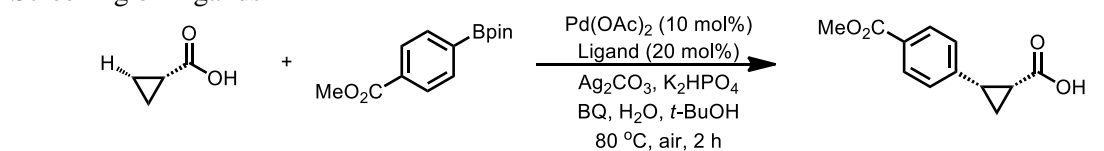

|           |                     |           |                    |           |
|-----------|---------------------|-----------|--------------------|-----------|
| No Ligand |                     |           |                    |           |
| 11% yield | 38% yield, 96:4 er  | 11% yield | 9% yield           | 3% yield  |
|           |                     |           |                    |           |
| 13% yield | 8% yield            | N.R.      | N.R.               | N.R.      |
|           |                     |           |                    |           |
| N.R.      | 23% yield, 96:4 er  | 17% yield | 19% yield          | 14% yield |
|           |                     |           |                    |           |
| 7% yield  | 22% yield, 86:14 er | 14% yield | 34% yield, 95:5 er | 15% yield |

<sup>a</sup> Conditions: **1a** (0.1 mmol), **2a** (1.5 equiv), Pd(OAc)<sub>2</sub> (10 mol%), Ligand (20 mol%), Ag<sub>2</sub>CO<sub>3</sub> (1.5 equiv), K<sub>2</sub>HPO<sub>4</sub> (1.5 equiv), BQ (0.5 equiv), H<sub>2</sub>O (10.0 equiv), *t*-BuOH (1.0 mL), 80 °C, air, 12 h. <sup>b</sup> <sup>1</sup>H NMR yields, using CH<sub>2</sub>Br<sub>2</sub> as an internal standard.

Screening of Ag Salts and Pd source<sup>a,b</sup>

| <b>1a</b>         |       |      | <b>2a</b>                                             |       |      | <b>3a</b> |  |  |
|-------------------|-------|------|-------------------------------------------------------|-------|------|-----------|--|--|
| Ag Salt           | Yield | er   | Pd source                                             | Yield | er   |           |  |  |
| no change         | 70%   | 97:3 | PdCl <sub>2</sub>                                     | 16%   | -    |           |  |  |
| AgOAc             | 43%   | 96:4 | Pd(TFA) <sub>2</sub>                                  | 37%   | 96:4 |           |  |  |
| AgOPiv            | 10%   | -    | Pd(MeCN) <sub>4</sub> (BF <sub>4</sub> ) <sub>2</sub> | 34%   | 94:6 |           |  |  |
| AgTFA             | NR    | -    | Pd(MeCN) <sub>2</sub> Cl <sub>2</sub>                 | 35%   | 93:7 |           |  |  |
| AgF               | 8%    | -    | Pd(PhCN) <sub>2</sub> Cl <sub>2</sub>                 | 30%   | 94:6 |           |  |  |
| Ag <sub>2</sub> O | 31%   | 93:7 | [Pd(allyl)Cl] <sub>2</sub>                            | 23%   | 92:8 |           |  |  |
|                   |       |      | Pd(pph <sub>3</sub> ) <sub>2</sub> Cl <sub>2</sub>    | 20%   | 91:9 |           |  |  |

<sup>a</sup> Conditions: **1a** (0.1 mmol), **2a** (1.5 equiv), Pd (10 mol%), **L25** (20 mol%), Ag (1.5 equiv), K<sub>2</sub>HPO<sub>4</sub> (1.5 equiv), BQ (0.5 equiv), H<sub>2</sub>O (10.0 equiv), *t*-BuOH (1.0 mL), 80 °C, air, 12 h. <sup>b</sup> <sup>1</sup>H NMR yields, using CH<sub>2</sub>Br<sub>2</sub> as an internal standard.

#### Screening of Solvent and Temperature<sup>a,b</sup>

| Entry | Solvent          | Temperature | Yield | er    |
|-------|------------------|-------------|-------|-------|
| 1     | <i>t</i> -BuOH   | 80 °C       | 70%   | 97:3  |
| 2     | <i>t</i> -AmylOH | 80 °C       | 56%   | 94:6  |
| 3     | THF              | 80 °C       | 16%   | -     |
| 4     | Dioxane          | 80 °C       | 19%   | -     |
| 5     | MeCN             | 80 °C       | N.R.  | -     |
| 6     | HFIP             | 80 °C       | 21%   | 89:11 |
| 7     | DMF              | 80 °C       | N.R.  | -     |
| 8     | <i>t</i> -BuOH   | 70 °C       | 61%   | 97:3  |
| 9     | <i>t</i> -BuOH   | 90 °C       | 71%   | 90:10 |

<sup>a</sup> Conditions: **1a** (0.1 mmol), **2a** (1.5 equiv), Pd(OAc)<sub>2</sub> (10 mol%), **L25** (20 mol%), Ag<sub>2</sub>CO<sub>3</sub> (1.5 equiv), K<sub>2</sub>HPO<sub>4</sub> (1.5 equiv), BQ (0.5 equiv), H<sub>2</sub>O (10.0 equiv), *t*-BuOH (1.0 mL), 80 °C, air, 12 h. <sup>b</sup> <sup>1</sup>H NMR yields, using CH<sub>2</sub>Br<sub>2</sub> as an internal standard.

### Screening of Bases<sup>a,b</sup>

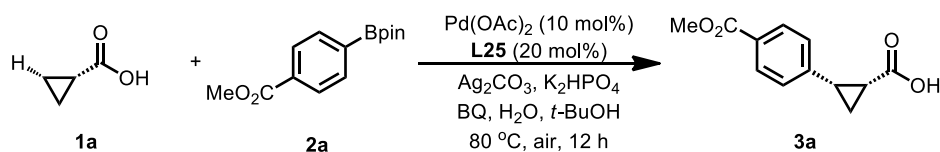

| Base                             | Yield | er   | Base                                               | Yield | er   |
|----------------------------------|-------|------|----------------------------------------------------|-------|------|
| None                             | 3%    | -    | LiF                                                | NR    | -    |
| NaOAc                            | 11%   | -    | KOAc                                               | 32%   | 94:6 |
| NaHCO <sub>3</sub>               | 9%    | -    | KHCO <sub>3</sub>                                  | 12%   | -    |
| Na <sub>2</sub> CO <sub>3</sub>  | 23%   | 94:6 | K <sub>2</sub> CO <sub>3</sub>                     | 29%   | 94:6 |
| NaH <sub>2</sub> PO <sub>4</sub> | NR    | -    | KH <sub>2</sub> PO <sub>4</sub>                    | 18%   | -    |
| Na <sub>2</sub> HPO <sub>4</sub> | 5%    | -    | K <sub>2</sub> HPO <sub>4</sub> ·3H <sub>2</sub> O | 45%   | 93:7 |
| Na <sub>3</sub> PO <sub>4</sub>  | 18%   | -    | K <sub>3</sub> PO <sub>4</sub>                     | 47%   | 96:4 |
| Li <sub>2</sub> CO <sub>3</sub>  | NR    | -    | KF                                                 | 11%   | -    |
| LiOAc                            | NR    | -    | Cs <sub>2</sub> CO <sub>3</sub>                    | 26%   | 95:5 |
| Li <sub>3</sub> PO <sub>4</sub>  | NR    | -    | CsOAc                                              | 11%   | -    |

<sup>a</sup> Conditions: **1a** (0.1 mmol), **2a** (1.5 equiv), Pd(OAc)<sub>2</sub> (10 mol%), **L25** (20 mol%), Ag<sub>2</sub>CO<sub>3</sub> (1.5 equiv), K<sub>2</sub>HPO<sub>4</sub> (1.5 equiv), BQ (0.5 equiv), H<sub>2</sub>O (10.0 equiv), *t*-BuOH (1.0 mL), 80 °C, air, 12 h. <sup>b</sup> <sup>1</sup>H NMR yields, using CH<sub>2</sub>Br<sub>2</sub> as an internal standard.

### Screening of loading of reagents<sup>a,b</sup>

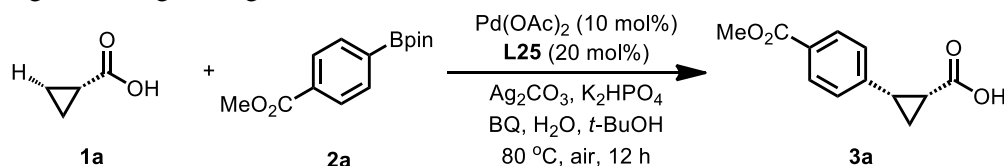

| Change                                      | Yield | Base                                        | Yield |
|---------------------------------------------|-------|---------------------------------------------|-------|
| No Change                                   | 70%   | Ag <sub>2</sub> CO <sub>3</sub> (1.0 equiv) | 57%   |
| K <sub>2</sub> HPO <sub>4</sub> (1.0 equiv) | 61%   | Ag <sub>2</sub> CO <sub>3</sub> (2.0 equiv) | 68%   |
| K <sub>2</sub> HPO <sub>4</sub> (2.0 equiv) | 67%   | ArBpin (1.0 equiv)                          | 57%   |
| K <sub>2</sub> HPO <sub>4</sub> (3.0 equiv) | 46%   | ArBpin (2.0 equiv)                          | 70%   |

<sup>a</sup> Conditions: **1a** (0.1 mmol), **2a** (1.5 equiv), Pd(OAc)<sub>2</sub> (10 mol%), **L25** (20 mol%), Ag<sub>2</sub>CO<sub>3</sub> (1.5 equiv), K<sub>2</sub>HPO<sub>4</sub> (1.5 equiv), BQ (0.5 equiv), H<sub>2</sub>O (10.0 equiv), *t*-BuOH (1.0 mL), 80 °C, air, 12 h. <sup>b</sup> <sup>1</sup>H NMR yields, using CH<sub>2</sub>Br<sub>2</sub> as an internal standard.

## 3.3 Optimization of Conditions of Arylation for Cyclobutanecarboxylic Acid

### Screening of Solvent and Temperature<sup>a,b</sup>

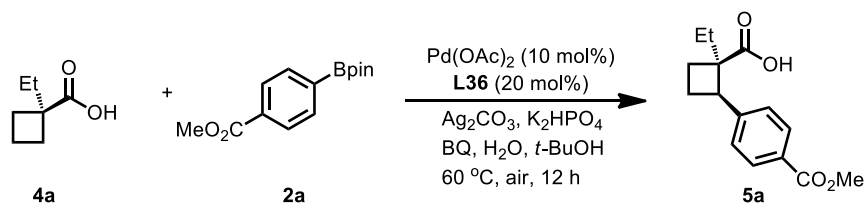

| Entry | Solvent          | Temperature | Yield | er    |
|-------|------------------|-------------|-------|-------|
| 1     | <i>t</i> -BuOH   | 60 °C       | 62%   | 94:6  |
| 2     | <i>t</i> -AmylOH | 60 °C       | 38%   | 85:15 |
| 3     | THF              | 60 °C       | 23%   | 86:14 |
| 4     | Dioxane          | 60 °C       | 12%   | -     |
| 5     | MeCN             | 60 °C       | N.R.  | -     |
| 6     | HFIP             | 60 °C       | 32%   | 64:36 |
| 7     | DMF              | 60 °C       | N.R.  | -     |
| 8     | <i>t</i> -BuOH   | 80 °C       | 60%   | 90:10 |
| 9     | <i>t</i> -BuOH   | 50 °C       | 46%   | 94:6  |

<sup>a</sup> Conditions: **4a** (0.1 mmol), **2a** (1.5 equiv), Pd(OAc)<sub>2</sub> (10 mol%), **L36** (20 mol%), Ag<sub>2</sub>CO<sub>3</sub> (2.0 equiv), K<sub>2</sub>HPO<sub>4</sub> (1.5 equiv), BQ (0.5 equiv), H<sub>2</sub>O (5.0 equiv), *t*-BuOH (1.0 mL), 60 °C, air, 12 h. <sup>b</sup> <sup>1</sup>H NMR yields, using CH<sub>2</sub>Br<sub>2</sub> as an internal standard.

#### Screening of loading of reagents<sup>a,b</sup>

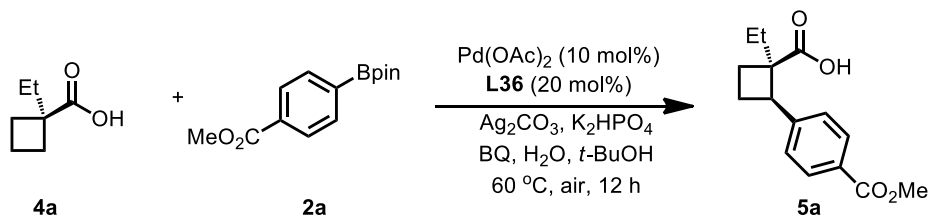

| Change                                      | Yield | Base                                        | Yield |
|---------------------------------------------|-------|---------------------------------------------|-------|
| No Change                                   | 62%   | Ag <sub>2</sub> CO <sub>3</sub> (1.0 equiv) | 53%   |
| K <sub>2</sub> HPO <sub>4</sub> (1.0 equiv) | 50%   | Ag <sub>2</sub> CO <sub>3</sub> (2.0 equiv) | 62%   |
| K <sub>2</sub> HPO <sub>4</sub> (2.0 equiv) | 52%   | ArBpin (1.0 equiv)                          | 51%   |
| K <sub>2</sub> HPO <sub>4</sub> (3.0 equiv) | 43%   | ArBpin (2.0 equiv)                          | 62%   |

<sup>a</sup> Conditions: **4a** (0.1 mmol), **2a** (1.5 equiv), Pd(OAc)<sub>2</sub> (10 mol%), **L36** (20 mol%), Ag<sub>2</sub>CO<sub>3</sub> (2.0 equiv), K<sub>2</sub>HPO<sub>4</sub> (1.5 equiv), BQ (0.5 equiv), H<sub>2</sub>O (5.0 equiv), *t*-BuOH (1.0 mL), 60 °C, air, 12 h. <sup>b</sup> <sup>1</sup>H NMR yields, using CH<sub>2</sub>Br<sub>2</sub> as an internal standard.

### 3.4 Optimization of Conditions of Vinylation for Cyclopropanecarboxylic Acid

#### Screening of Ag Salts and Pd source<sup>a,b</sup>

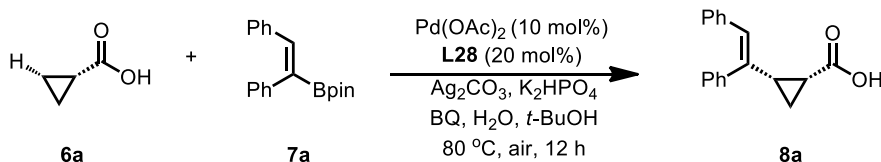

| Ag Salt           | Yield | er   | Pd source                                             | Yield | er   |
|-------------------|-------|------|-------------------------------------------------------|-------|------|
| no change         | 48%   | 96:4 | PdCl <sub>2</sub>                                     | 18%   | -    |
| AgOAc             | 19%   | -    | Pd(TFA) <sub>2</sub>                                  | 52%   | 95:5 |
| AgOPiv            | 12%   | -    | Pd(MeCN) <sub>4</sub> (BF <sub>4</sub> ) <sub>2</sub> | 63%   | 98:2 |
| AgTFA             | 7%    | -    | Pd(MeCN) <sub>2</sub> Cl <sub>2</sub>                 | 53%   | 97:4 |
| AgF               | 17%   | -    | Pd(PhCN) <sub>2</sub> Cl <sub>2</sub>                 | 52%   | 96:4 |
| Ag <sub>2</sub> O | 29%   | 96:4 | [Pd(allyl)Cl] <sub>2</sub>                            | 71%   | 98:2 |
|                   |       |      | Pd(pph <sub>3</sub> ) <sub>2</sub> Cl <sub>2</sub>    | 54%   | 96:4 |

<sup>a</sup> Conditions: **6a** (0.1 mmol), **7a** (2.0 equiv), Pd (10 mol%), **L28** (20 mol%), Ag (1.5 equiv), K<sub>2</sub>HPO<sub>4</sub> (1.5 equiv), BQ (0.5 equiv), H<sub>2</sub>O (2.0 equiv), *t*-BuOH (1.0 mL), 80 °C, air, 12 h. <sup>b</sup> <sup>1</sup>H NMR yields, using CH<sub>2</sub>Br<sub>2</sub> as an internal standard.

#### Screening of Ligand<sup>a,b</sup>

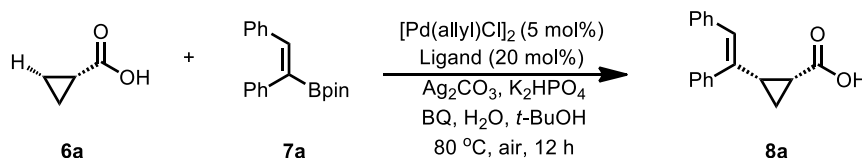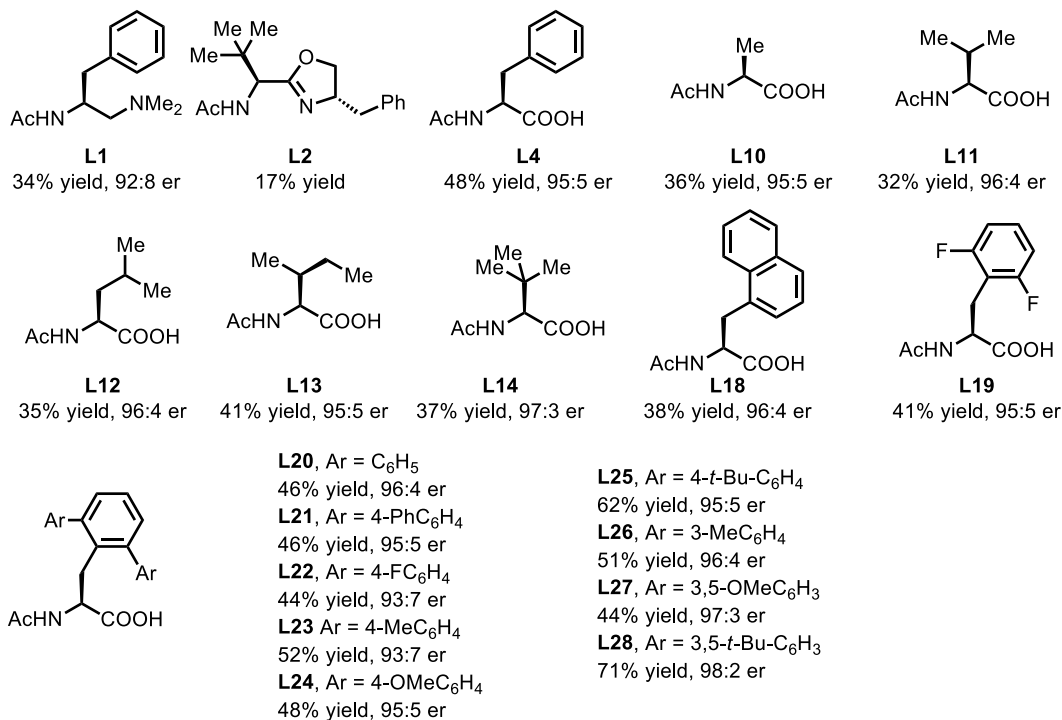

<sup>a</sup> Conditions: **6a** (0.1 mmol), **7a** (2.0 equiv), [Pd(allyl)Cl]<sub>2</sub> (5 mol%), Ligand (20 mol%), Ag<sub>2</sub>CO<sub>3</sub> (1.5 equiv),



K<sub>2</sub>HPO<sub>4</sub> (1.5 equiv), BQ (0.5 equiv), H<sub>2</sub>O (2.0 equiv), *t*-BuOH (1.0 mL), 80 °C, air, 12 h. <sup>b</sup> <sup>1</sup>H NMR yields, using CH<sub>2</sub>Br<sub>2</sub> as an internal standard.

### 3.5 Enantioselective Arylation of Cyclopropanecarboxylic acid

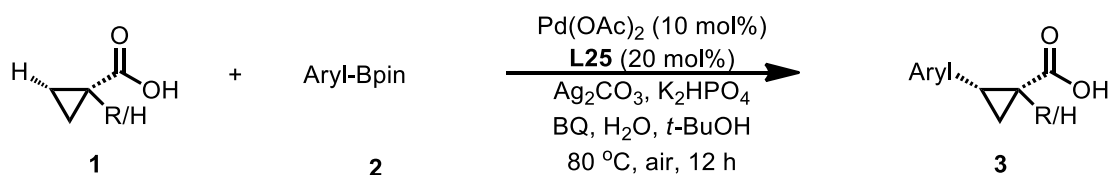

**General procedure for enantioselective arylation of cyclopropanecarboxylic acid:** A 2-dram vial equipped with a magnetic stir bar was charged with Pd(OAc)<sub>2</sub> (2.2 mg, 10 mol%) and L25 (9.4 mg, 20 mol%) in *t*-BuOH (1.0 ml) and then stirred at the rate of 300 rpm at room temperature for 5 min. The appropriate cyclopropanecarboxylic acid substrate (0.10 mmol), Ag<sub>2</sub>CO<sub>3</sub> (41.4 mg, 0.15 mmol), K<sub>2</sub>HPO<sub>4</sub> (26.0 mg, 0.15 mmol), Aryl-Bpin (0.15 mmol), BQ (5.4 mg, 0.05 mmol), H<sub>2</sub>O (18.0 mg, 1.0 mmol) was then added. Subsequently the vial was capped and closed tightly. The reaction mixture was then stirred at the rate of 300 rpm at 80 °C for 12 h. After being allowed to cool to room temperature, the mixture was diluted with ethyl acetate and 0.1 ml of acetic acid was then added. The mixture was passed through a pad of Celite with ethyl acetate as the eluent to remove any insoluble precipitate. The resulting solution was concentrated, and the residual mixture was dissolved with a minimal amount of acetone and loaded onto a preparative TLC plate. The pure product was then isolated using preparative TLC with ethyl acetate and hexane (1/4 to 1/1) as the eluent and 1% v/v of acetic acid as additive.

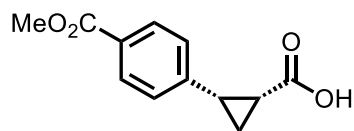

#### (1R,2S)-2-(4-(methoxycarbonyl)phenyl)cyclopropane-1-carboxylic acid (3a)

Substrate **1** was arylated following the general arylation procedure (eluent: hexane/ethyl acetate = 2/1 with 1% v/v of acetic acid). The product was obtained as a white solid (70% yield).

The enantiomeric purity of the substrate was determined by SFC analysis (CHIRALPAK® AS-3 column, 30% *i*PrOH / CO<sub>2</sub>, flow rate 2 mL/min, retention time 1.825 min (major) and 2.171 min (minor), 97:3 er); [α]<sub>D</sub><sup>20</sup> = -6.7 (c = 1.0, CHCl<sub>3</sub>).

<sup>1</sup>H NMR (600 MHz, CDCl<sub>3</sub>) δ 7.92 (d, *J* = 8.3 Hz, 2H), 7.29 (d, *J* = 7.8 Hz, 2H), 3.91 (s, 3H), 2.63 (q, *J* = 8.5 Hz, 1H), 2.08 (ddd, *J* = 9.2, 7.8, 5.6 Hz, 1H), 1.69 (dt, *J* = 7.6, 5.4 Hz, 1H), 1.42 (ddd, *J* = 8.5, 7.8, 5.1 Hz, 1H); <sup>13</sup>C NMR (150 MHz, CDCl<sub>3</sub>) δ 176.11, 167.05, 141.35, 129.30, 129.23, 128.59, 52.02, 26.32, 21.65, 12.24.

HRMS (ESI-TOF) *m/z* Calcd for C<sub>12</sub>H<sub>13</sub>O<sub>4</sub><sup>+</sup> [M+H]<sup>+</sup> 221.0808, found 221.0814.

The absolute stereochemistry was assigned based on comparing the specific rotation of **3m** with literature.

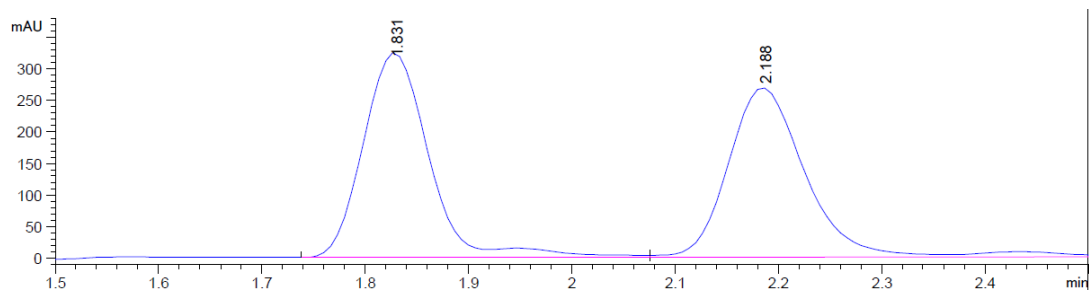

| Peak # | RetTime [min] | Type | Width [min] | Area [mAU*s] | Height [mAU] | Area %  |
|--------|---------------|------|-------------|--------------|--------------|---------|
| 1      | 1.831         | BV R | 0.0670      | 1432.96143   | 323.97009    | 50.1015 |
| 2      | 2.188         | VV R | 0.0791      | 1427.15442   | 268.27094    | 49.8985 |

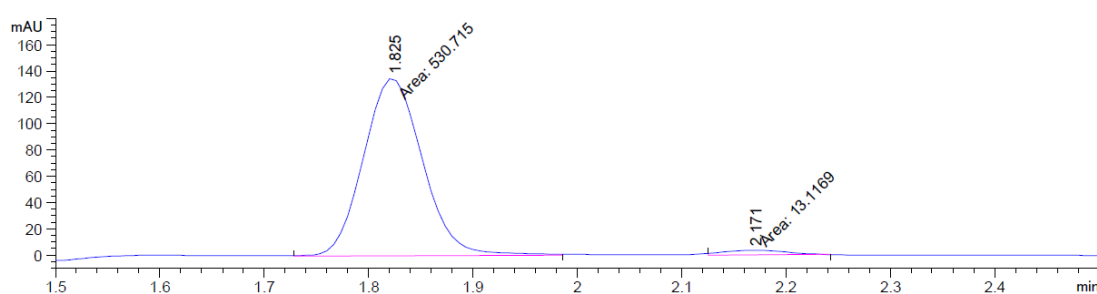

| Peak # | RetTime [min] | Type | Width [min] | Area [mAU*s] | Height [mAU] | Area %  |
|--------|---------------|------|-------------|--------------|--------------|---------|
| 1      | 1.825         | MM   | 0.0653      | 530.71539    | 135.44972    | 97.5881 |
| 2      | 2.171         | MM   | 0.0651      | 13.11685     | 3.35660      | 2.4119  |

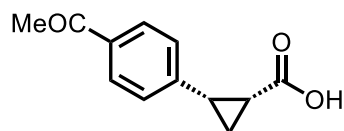

### (1R,2S)-2-(4-acetylphenyl)cyclopropane-1-carboxylic acid (**3b**)

Substrate **1** was arylated following the general arylation procedure (eluent: hexane/ethyl acetate = 2/1 with 1% v/v of acetic acid). The product was obtained as a white solid (62% yield).

The enantiomeric purity of the substrate was determined by SFC analysis (CHIRALPAK® AS-3 column, 5% *i*PrOH / CO<sub>2</sub>, flow rate 2 mL/min, retention time 9.023 min (major) and 14.154 min (minor), 98:2 er);

<sup>1</sup>H NMR (600 MHz, CDCl<sub>3</sub>) δ 7.84 (d, *J* = 8.3 Hz, 2H), 7.32 (d, *J* = 8.1 Hz, 2H), 2.64 (q, *J* = 8.5 Hz, 1H), 2.58 (s, 3H), 2.10 (ddd, *J* = 9.3, 7.8, 5.6 Hz, 1H), 1.71 (dt, *J* = 7.8, 5.4 Hz, 1H), 1.44 (td, *J* = 8.2, 5.2 Hz, 1H); <sup>13</sup>C NMR (150 MHz, CDCl<sub>3</sub>) δ 197.95, 175.99, 141.63, 135.66, 129.47, 128.04, 26.58, 26.32, 21.70, 12.29.

HRMS (ESI-TOF) *m/z* Calcd for C<sub>12</sub>H<sub>13</sub>O<sub>3</sub><sup>+</sup> [M+H]<sup>+</sup> 205.0859, found 205.0857.

The absolute stereochemistry was assigned based on comparing the specific rotation of **3m**

with literature.

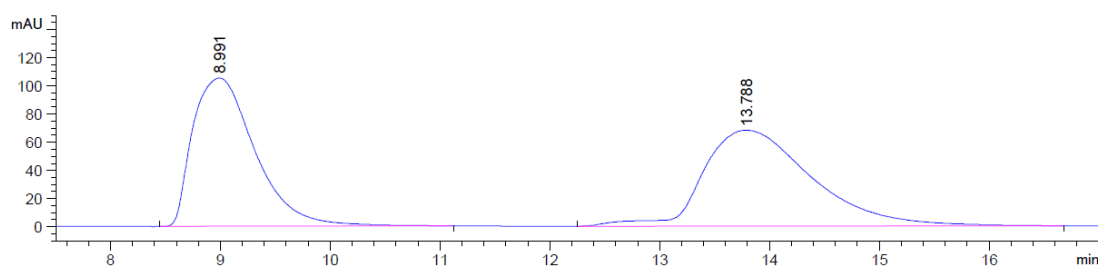

| Peak # | RetTime [min] | Type | Width [min] | Area [mAU*s] | Height [mAU] | Area %  |
|--------|---------------|------|-------------|--------------|--------------|---------|
| 1      | 8.991         | BB   | 0.6176      | 4144.10840   | 105.20343    | 47.0553 |
| 2      | 13.788        | BB   | 1.0413      | 4662.78320   | 68.06223     | 52.9447 |

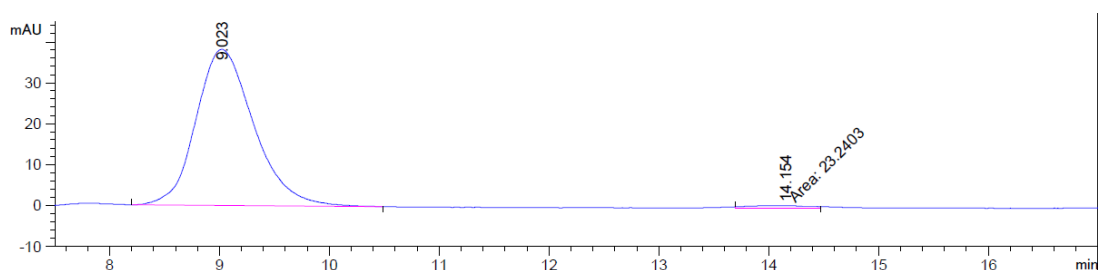

| Peak # | RetTime [min] | Type | Width [min] | Area [mAU*s] | Height [mAU] | Area %  |
|--------|---------------|------|-------------|--------------|--------------|---------|
| 1      | 9.023         | BB   | 0.5499      | 1393.16235   | 38.16215     | 98.3592 |
| 2      | 14.154        | MM   | 0.6197      | 23.24029     | 6.25024e-1   | 1.6408  |

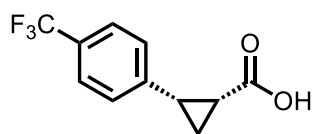

### (1R,2S)-2-(4-(trifluoromethyl)phenyl)cyclopropane-1-carboxylic acid (3c)

Substrate **1** was arylated following the general arylation procedure (eluent: hexane/ethyl acetate = 5/1 with 1% v/v of acetic acid). The product was obtained as a pale-yellow solid (69% yield).

The enantiomeric purity of the substrate was determined by SFC analysis (CHIRALPAK® OJ-3 column, 5% *i*PrOH / CO<sub>2</sub>, flow rate 1 mL/min, retention time 4.897 min (major) and 5.495 min (minor), 97:3 er);

<sup>1</sup>H NMR (600 MHz, CDCl<sub>3</sub>) δ 7.49 (d, *J* = 8.5 Hz, 2H), 7.33 (d, *J* = 8.4 Hz, 2H), 2.64 (q, *J* = 8.6 Hz, 1H), 2.09 (ddd, *J* = 9.3, 7.7, 5.6 Hz, 1H), 1.69 (dt, *J* = 7.7, 5.4 Hz, 1H), 1.43 (ddd, *J* = 8.7, 7.8, 5.2 Hz, 1H); <sup>13</sup>C NMR (150 MHz, CDCl<sub>3</sub>) δ 176.43, 140.02 (q, *J* = 1.5 Hz), 129.59, 128.97 (q, *J* = 31.5 Hz), 124.82 (q, *J* = 3 Hz), 124.22 (q, *J* = 270 Hz), 26.09, 21.58, 12.16. <sup>19</sup>F NMR (376 MHz, CDCl<sub>3</sub>) δ -62.69.

HRMS (ESI-TOF)  $m/z$  Calcd for  $C_{11}H_{10}F_3O_2^+ [M+H]^+$  231.0627, found 231.0631.

The absolute stereochemistry was assigned based on comparing the specific rotation of **3m** with literature.

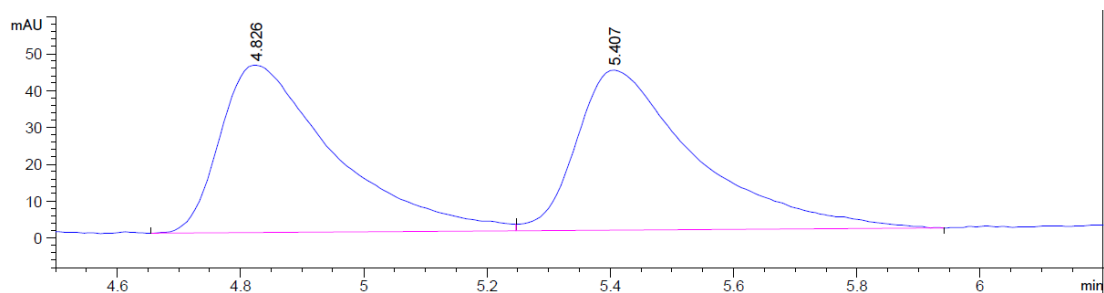

| Peak # | RetTime [min] | Type | Width [min] | Area [mAU*s] | Height [mAU] | Area %  |
|--------|---------------|------|-------------|--------------|--------------|---------|
| 1      | 4.826         | BV   | 0.1818      | 583.19299    | 45.41054     | 50.0033 |
| 2      | 5.407         | VB   | 0.1866      | 583.11597    | 43.42923     | 49.9967 |

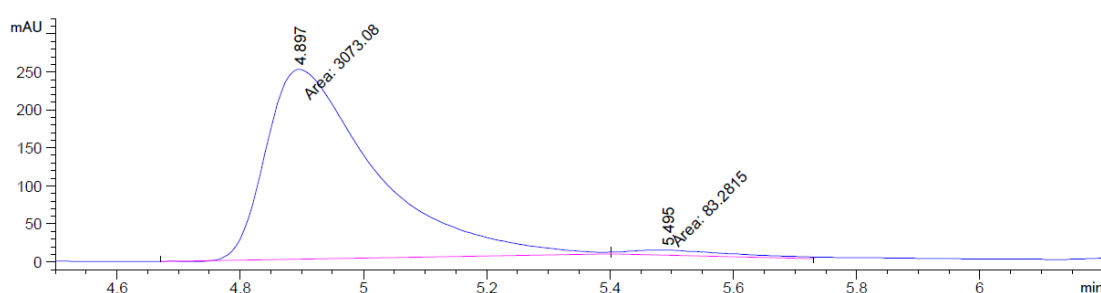

| Peak # | RetTime [min] | Type | Width [min] | Area [mAU*s] | Height [mAU] | Area %  |
|--------|---------------|------|-------------|--------------|--------------|---------|
| 1      | 4.897         | MM   | 0.2046      | 3073.07617   | 250.32617    | 97.3615 |
| 2      | 5.495         | MM   | 0.2029      | 83.28146     | 6.84065      | 2.6385  |

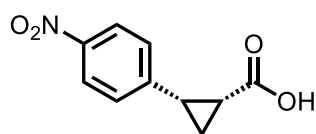

### (1R,2S)-2-(4-nitrophenyl)cyclopropane-1-carboxylic acid (**3d**)

Substrate **1** was arylated following the general arylation procedure (eluent: hexane/ethyl acetate = 2/1 with 1% v/v of acetic acid). The product was obtained as a pale-yellow solid (63% yield).

The enantiomeric purity of the substrate was determined by SFC analysis (CHIRALPAK® OJ-3 column, 5% <sup>i</sup>PrOH / CO<sub>2</sub>, flow rate 2 mL/min, retention time 5.160 min (major) and 5.715 min (minor), 97:3 er);

<sup>1</sup>H NMR (600 MHz, CDCl<sub>3</sub>) δ 8.11 (d,  $J$  = 8.8 Hz, 2H), 7.39 (d,  $J$  = 8.7 Hz, 2H), 2.67 (q,  $J$  = 8.5 Hz, 1H), 2.15 (ddd,  $J$  = 9.3, 7.8, 5.6 Hz, 1H), 1.72 (dt,  $J$  = 7.7, 5.5 Hz, 1H), 1.53 – 1.47 (m,

<sup>1</sup>H); <sup>13</sup>C NMR (150 MHz, CDCl<sub>3</sub>) δ 175.87, 146.84, 143.71, 130.14, 123.13, 26.05, 21.90, 12.57.

HRMS (ESI-TOF) *m/z* Calcd for C<sub>10</sub>H<sub>10</sub>NO<sub>4</sub><sup>+</sup> [M+H]<sup>+</sup> 208.0604, found 208.0607.

The absolute stereochemistry was assigned based on comparing the specific rotation of **3m** with literature.

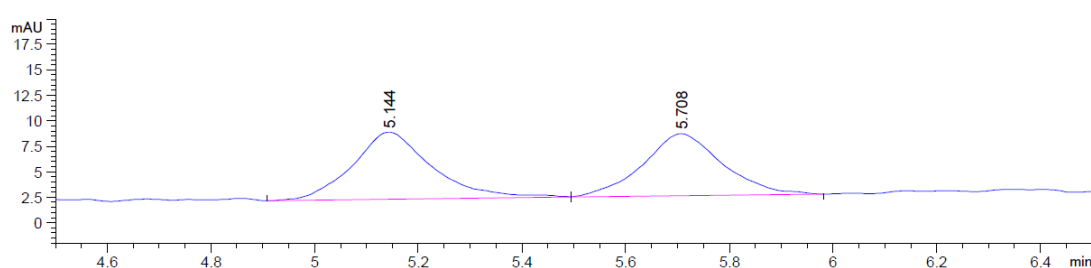

| Peak # | RetTime [min] | Type | Width [min] | Area [mAU*s] | Height [mAU] | Area %  |
|--------|---------------|------|-------------|--------------|--------------|---------|
| 1      | 5.144         | BV   | 0.1571      | 55.05377     | 4.97626      | 49.4209 |
| 2      | 5.706         | VB   | 0.1719      | 56.34407     | 4.69940      | 50.5791 |

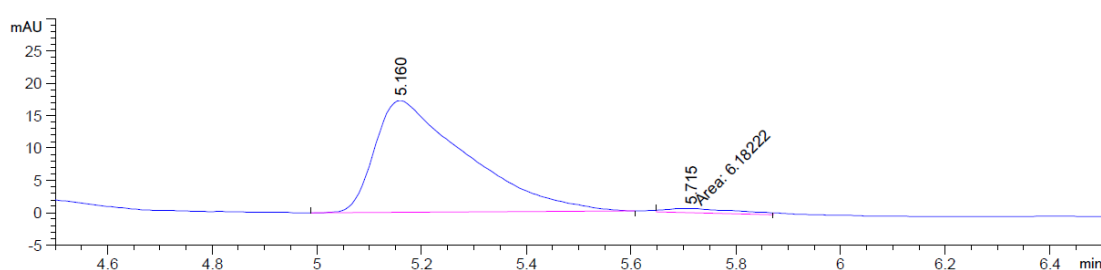

| Peak # | RetTime [min] | Type | Width [min] | Area [mAU*s] | Height [mAU] | Area %  |
|--------|---------------|------|-------------|--------------|--------------|---------|
| 1      | 5.160         | BB   | 0.1687      | 211.52269    | 17.29119     | 97.1603 |
| 2      | 5.715         | MM   | 0.1533      | 6.18222      | 6.72103e-1   | 2.8397  |

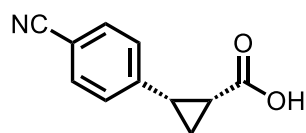

### (1R,2S)-2-(4-cyanophenyl)cyclopropane-1-carboxylic acid (**3e**)

Substrate **1** was arylated following the general arylation procedure (eluent: hexane/ethyl acetate = 2/1 with 1% v/v of acetic acid). The product was obtained as a pale-yellow solid (66% yield).

The enantiomeric purity of the substrate was determined by SFC analysis (CHIRALPAK® AS-3 column, 5% <sup>i</sup>PrOH / CO<sub>2</sub>, flow rate 2 mL/min, retention time 6.706 min (major) and 12.382 min (minor), 97:3 er);

<sup>1</sup>H NMR (600 MHz, CDCl<sub>3</sub>) δ 7.54 (d, *J* = 8.3 Hz, 2H), 7.33 (d, *J* = 8.2 Hz, 2H), 2.64 (q, *J* = 8.5 Hz, 1H), 2.12 (ddd, *J* = 9.2, 7.8, 5.6 Hz, 1H), 1.69 (dt, *J* = 7.8, 5.5 Hz, 1H), 1.51 – 1.40 (m,

$^1\text{H}$ );  $^{13}\text{C}$  NMR (150 MHz,  $\text{CDCl}_3$ )  $\delta$  176.23, 141.55, 131.68, 130.06, 118.90, 110.52, 26.28, 21.82, 12.27.

HRMS (ESI-TOF)  $m/z$  Calcd for  $\text{C}_{11}\text{H}_{10}\text{NO}_2^+$   $[\text{M}+\text{H}]^+$  188.0706, found 188.0704.

The absolute stereochemistry was assigned based on comparing the specific rotation of **3m** with literature.

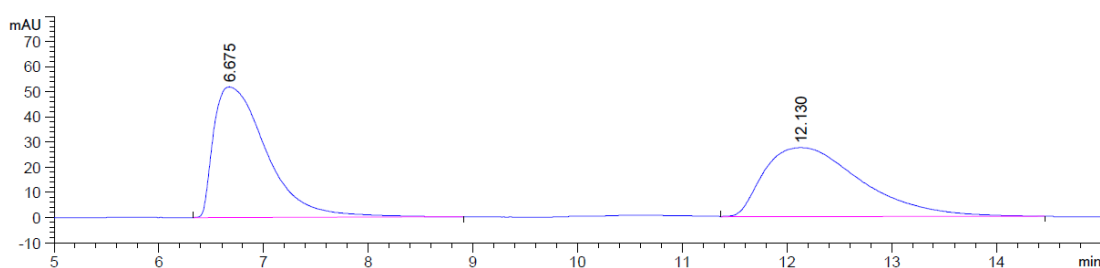

| Peak # | RetTime [min] | Type | Width [min] | Area [mAU*s] | Height [mAU] | Area %  |
|--------|---------------|------|-------------|--------------|--------------|---------|
| 1      | 6.675         | BB   | 0.5512      | 1818.46094   | 51.84768     | 50.6245 |
| 2      | 12.130        | BB   | 0.8779      | 1773.59778   | 27.37505     | 49.3755 |

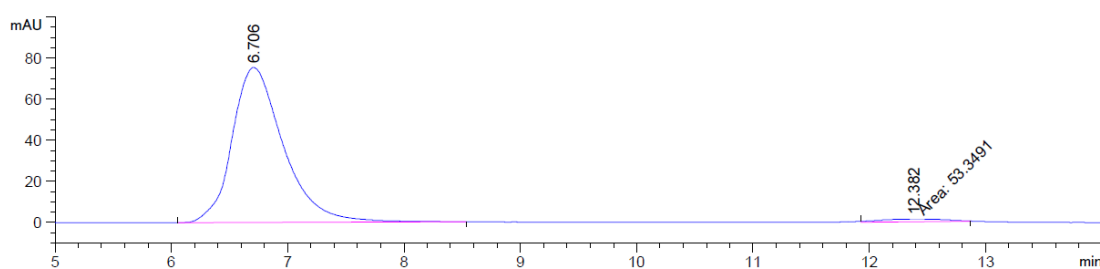

| Peak # | RetTime [min] | Type | Width [min] | Area [mAU*s] | Height [mAU] | Area %  |
|--------|---------------|------|-------------|--------------|--------------|---------|
| 1      | 6.706         | BB   | 0.4634      | 2305.85181   | 75.26052     | 97.7387 |
| 2      | 12.382        | MM   | 0.6413      | 53.34911     | 1.38640      | 2.2613  |

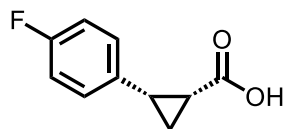

### (1R,2S)-2-(4-fluorophenyl)cyclopropane-1-carboxylic acid (**3f**)

Substrate **1** was arylated following the general arylation procedure (eluent: hexane/ethyl acetate = 5/1 with 1% v/v of acetic acid). The product was obtained as a pale-yellow solid (51% yield).

The enantiomeric purity of the substrate was determined by SFC analysis (CHIRALPAK® OJ-3 column, 5%  $i$ PrOH /  $\text{CO}_2$ , flow rate 2 mL/min, retention time 3.394 min (major) and 5.098 min (minor), 97:3 er);

$^1\text{H}$  NMR (600 MHz,  $\text{CDCl}_3$ )  $\delta$  7.20 (dd,  $J = 8.4, 5.5$  Hz, 2H), 6.93 (t,  $J = 8.7$  Hz, 2H), 2.59 (q,

$J = 8.5$  Hz, 1H), 2.05 (ddd,  $J = 9.3, 7.9, 5.5$  Hz, 1H), 1.63 (dt,  $J = 7.6, 5.4$  Hz, 1H), 1.38 (ddd,  $J = 8.7, 7.7, 5.1$  Hz, 1H);  $^{13}\text{C}$  NMR (150 MHz,  $\text{CDCl}_3$ )  $\delta$  175.84, 161.74 (d,  $J = 243$  Hz), 131.58 (d,  $J = 1.5$  Hz), 130.75 (d,  $J = 7.5$  Hz), 114.80 (d,  $J = 22.5$  Hz), 25.70, 21.22, 12.21;  $^{19}\text{F}$  NMR (376 MHz,  $\text{CDCl}_3$ )  $\delta$  -116.34.

HRMS (ESI-TOF)  $m/z$ . Calcd for  $\text{C}_{10}\text{H}_{10}\text{FO}_2^+$   $[\text{M}+\text{H}]^+$  181.0659, found 181.0658.

The absolute stereochemistry was assigned based on comparing the specific rotation of **3m** with literature.

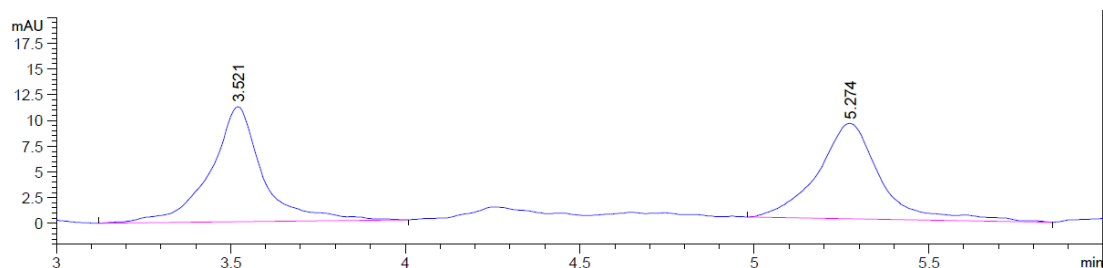

| Peak # | RetTime [min] | Type | Width [min] | Area [mAU*s] | Height [mAU] | Area %  |
|--------|---------------|------|-------------|--------------|--------------|---------|
| 1      | 3.521         | BB   | 0.1459      | 116.74403    | 11.17264     | 50.2261 |
| 2      | 5.274         | BB   | 0.1798      | 115.69290    | 9.25463      | 49.7739 |

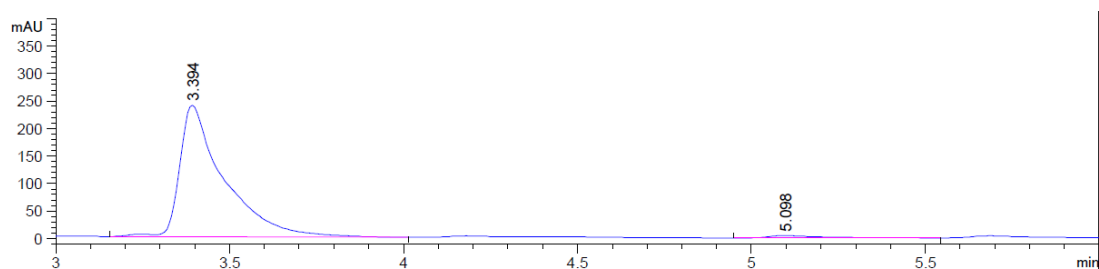

| Peak # | RetTime [min] | Type | Width [min] | Area [mAU*s] | Height [mAU] | Area %  |
|--------|---------------|------|-------------|--------------|--------------|---------|
| 1      | 3.394         | VB R | 0.1222      | 2117.96899   | 239.30923    | 97.4252 |
| 2      | 5.098         | BV   | 0.1702      | 55.97525     | 4.46813      | 2.5748  |

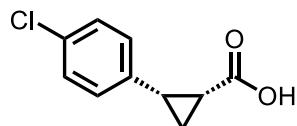

### (1R,2S)-2-(4-chlorophenyl)cyclopropane-1-carboxylic acid (**3g**)

Substrate **1** was arylated following the general arylation procedure (eluent: hexane/ethyl acetate = 5/1 with 1% v/v of acetic acid). The product was obtained as a pale-yellow solid (70% yield).

The enantiomeric purity of the substrate was determined by SFC analysis (CHIRALPAK® OJ-3 column, 5% *i*PrOH / CO<sub>2</sub>, flow rate 2 mL/min, retention time 4.726 min (major) and 6.986 min (minor), 97:3 er);

<sup>1</sup>H NMR (600 MHz, CDCl<sub>3</sub>) δ 7.22 (d, *J* = 8.5 Hz, 2H), 7.17 (d, *J* = 8.1 Hz, 2H), 2.58 (q, *J* = 8.5 Hz, 1H), 2.08 – 2.03 (m, 1H), 1.64 (dt, *J* = 7.7, 5.4 Hz, 1H), 1.39 (ddd, *J* = 8.7, 7.7, 5.1 Hz, 1H); <sup>13</sup>C NMR (150 MHz, CDCl<sub>3</sub>) δ 175.83, 134.40, 132.56, 130.59, 128.10, 25.82, 21.34, 12.15.

HRMS (ESI-TOF) *m/z* Calcd for C<sub>10</sub>H<sub>10</sub>ClO<sub>2</sub><sup>+</sup> [M+H]<sup>+</sup> 197.0364, found 197.0362.

The absolute stereochemistry was assigned based on comparing the specific rotation of **3m** with literature.

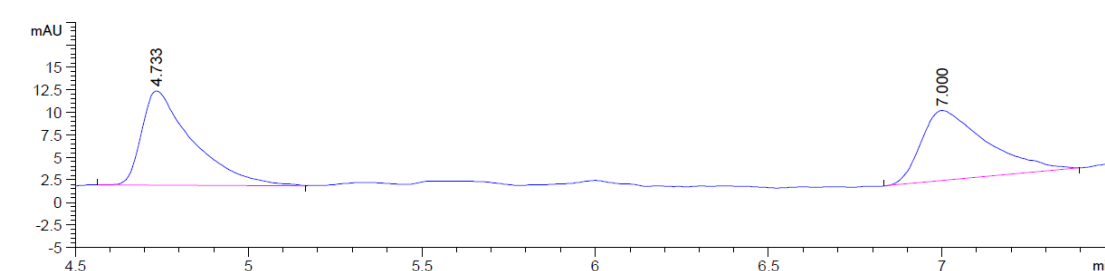

| Peak # | RetTime [min] | Type | Width [min] | Area [mAU*s] | Height [mAU] | Area %  |
|--------|---------------|------|-------------|--------------|--------------|---------|
| 1      | 4.733         | BB   | 0.1428      | 107.01307    | 10.51189     | 51.2681 |
| 2      | 7.000         | BB   | 0.1884      | 101.71914    | 7.78732      | 48.7319 |

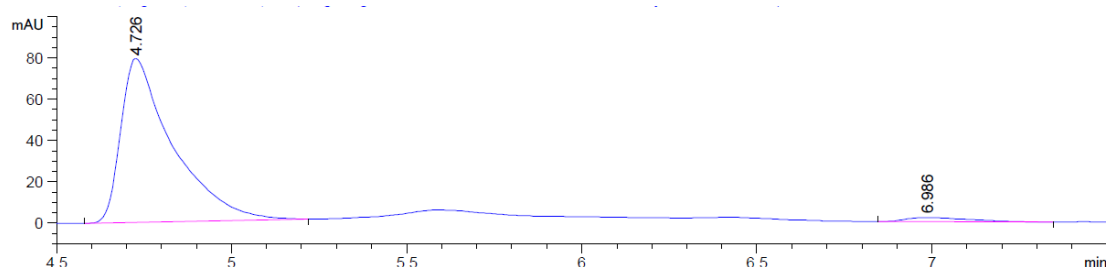

| Peak # | RetTime [min] | Type | Width [min] | Area [mAU*s] | Height [mAU] | Area %  |
|--------|---------------|------|-------------|--------------|--------------|---------|
| 1      | 4.726         | BB   | 0.1442      | 818.38550    | 79.45596     | 97.1407 |
| 2      | 6.986         | BB   | 0.1774      | 24.08867     | 2.01673      | 2.8593  |

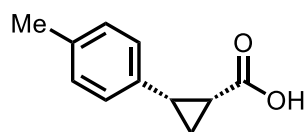

### (1R,2S)-2-(p-tolyl)cyclopropane-1-carboxylic acid (**3h**)

Substrate **1** was arylated following the general arylation procedure (eluent: hexane/ethyl acetate = 5/1 with 1% v/v of acetic acid). The product was obtained as a pale-yellow solid (62%



yield).

The enantiomeric purity of the substrate was determined by SFC analysis (CHIRALPAK® OJ-3 column, 5% <sup>t</sup>PrOH / CO<sub>2</sub>, flow rate 2 mL/min, retention time 5.470min (major) and 7.932 min (minor), 99:1 er);

<sup>1</sup>H NMR (600 MHz, CDCl<sub>3</sub>) δ 7.13 (d, *J* = 7.7 Hz, 2H), 7.05 (d, *J* = 7.7 Hz, 2H), 2.59 (q, *J* = 8.6 Hz, 1H), 2.30 (s, 3H), 2.06 – 2.00 (m, 1H), 1.64 (dt, *J* = 7.8, 5.4 Hz, 1H), 1.35 (td, *J* = 8.2, 4.9 Hz, 1H); <sup>13</sup>C NMR (150 MHz, CDCl<sub>3</sub>) δ 175.58, 136.28, 132.85, 129.09, 128.69, 26.17, 21.23, 21.09, 12.06.

HRMS (ESI-TOF) *m/z* Calcd for C<sub>11</sub>H<sub>13</sub>O<sub>2</sub><sup>+</sup> [M+H]<sup>+</sup> 177.0910, found 177.0905.

The absolute stereochemistry was assigned based on comparing the specific rotation of **3m** with literature.

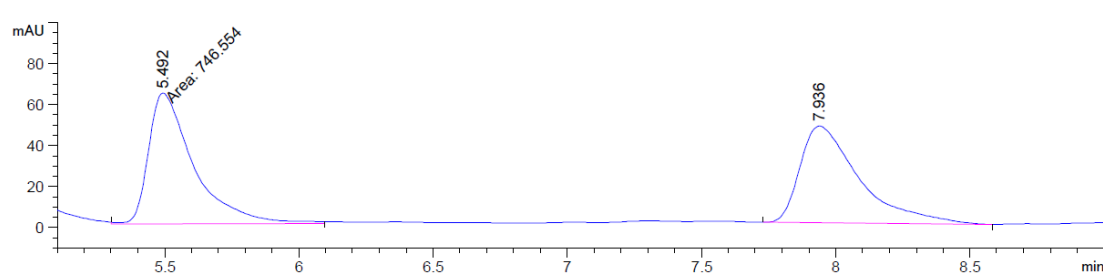

| Peak # | RetTime [min] | Type | Width [min] | Area [mAU*s] | Height [mAU] | Area %  |
|--------|---------------|------|-------------|--------------|--------------|---------|
| 1      | 5.492         | MM   | 0.1950      | 746.55359    | 63.81255     | 50.8004 |
| 2      | 7.936         | BB   | 0.2329      | 723.02826    | 47.15403     | 49.1996 |

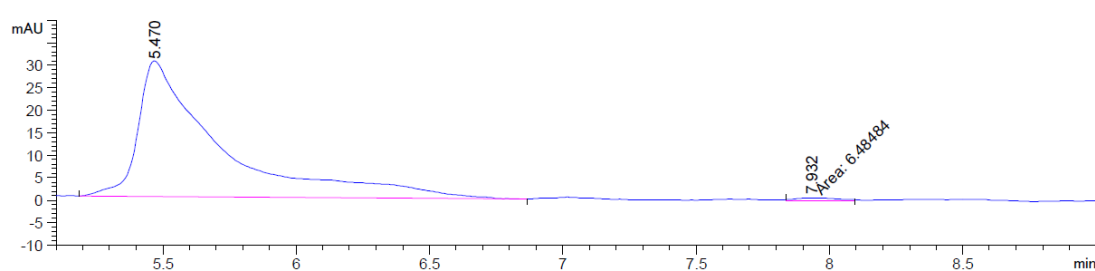

| Peak # | RetTime [min] | Type | Width [min] | Area [mAU*s] | Height [mAU] | Area %  |
|--------|---------------|------|-------------|--------------|--------------|---------|
| 1      | 5.470         | BB   | 0.2745      | 642.39697    | 30.15806     | 99.0006 |
| 2      | 7.932         | MM   | 0.1920      | 6.48484      | 5.62989e-1   | 0.9994  |

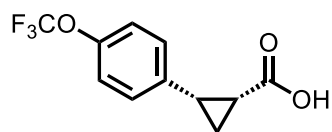

(1R,2S)-2-(4-(trifluoromethoxy)phenyl)cyclopropane-1-carboxylic acid (**3i**)

Substrate **1** was arylated following the general arylation procedure (eluent: hexane/ethyl

acetate = 3/1 with 1% v/v of acetic acid). The product was obtained as a pale-yellow solid (73% yield).

The enantiomeric purity of the substrate was determined by SFC analysis (CHIRALPAK® OJ-3 column, 3% *i*PrOH / CO<sub>2</sub>, flow rate 1 mL/min, retention time 6.532 min (major) and 8.508 min (minor), 97:3 er);

<sup>1</sup>H NMR (600 MHz, CDCl<sub>3</sub>) δ 7.22 (d, *J* = 8.7 Hz, 2H), 7.08 (d, *J* = 8.3 Hz, 2H), 2.58 (q, *J* = 8.5 Hz, 1H), 2.04 (ddd, *J* = 9.1, 7.7, 5.6 Hz, 1H), 1.62 (dt, *J* = 7.7, 5.4 Hz, 1H), 1.38 (td, *J* = 8.2, 5.1 Hz, 1H); <sup>13</sup>C NMR (150 MHz, CDCl<sub>3</sub>) δ 176.88, 147.98 (q, *J* = 1.5 Hz), 134.70, 130.58, 120.47 (q, *J* = 255 Hz), 120.37, 25.69, 21.45, 12.12; <sup>19</sup>F NMR (376 MHz, CDCl<sub>3</sub>) δ -58.12.

HRMS (ESI-TOF) *m/z* Calcd for C<sub>11</sub>H<sub>10</sub>F<sub>3</sub>O<sub>3</sub><sup>+</sup> [M+H]<sup>+</sup> 247.0577, found 247.0579.

The absolute stereochemistry was assigned based on comparing the specific rotation of **3m** with literature.

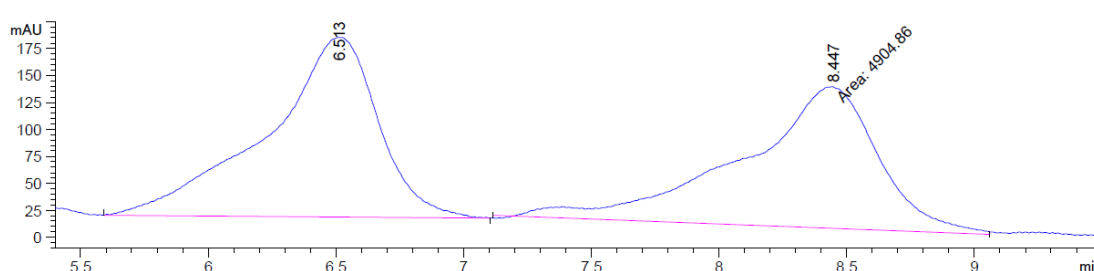

| Peak # | RetTime [min] | Type | Width [min] | Area [mAU*s] | Height [mAU] | Area %  |
|--------|---------------|------|-------------|--------------|--------------|---------|
| 1      | 6.513         | BV R | 0.3599      | 5056.48486   | 166.71335    | 50.7611 |
| 2      | 8.447         | MM   | 0.6216      | 4904.86084   | 131.51088    | 49.2389 |

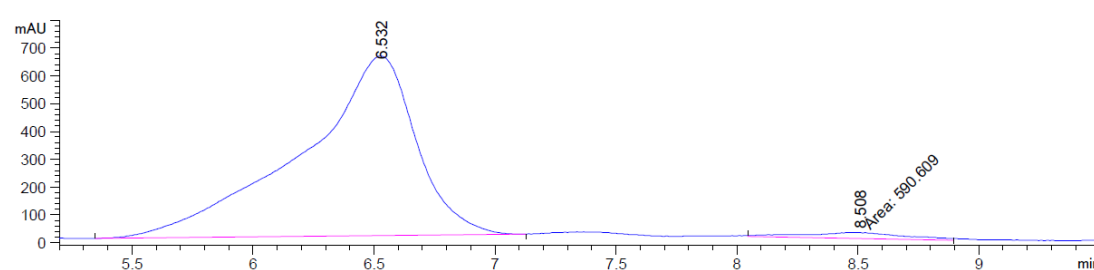

| Peak # | RetTime [min] | Type | Width [min] | Area [mAU*s] | Height [mAU] | Area %  |
|--------|---------------|------|-------------|--------------|--------------|---------|
| 1      | 6.532         | VV R | 0.4272      | 2.12447e4    | 646.74084    | 97.2952 |
| 2      | 8.508         | MM   | 0.4780      | 590.60895    | 20.59183     | 2.7048  |

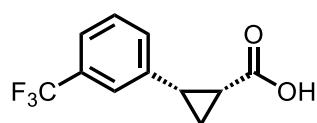

(1*R*,2*S*)-2-(3-(trifluoromethyl)phenyl)cyclopropane-1-carboxylic acid (**3j**)

Substrate **1** was arylated following the general arylation procedure (eluent: hexane/ethyl acetate = 5/1 with 1% v/v of acetic acid). The product was obtained as a pale-yellow oil (77% yield).

The enantiomeric purity of the substrate was determined by SFC analysis (CHIRALPAK® OJ-3 column, 5% *i*PrOH / CO<sub>2</sub>, flow rate 1 mL/min, retention time 4.529 min (major) and 5.711 min (minor), 92:8 er);

<sup>1</sup>H NMR (600 MHz, CDCl<sub>3</sub>) δ 7.48 (s, 1H), 7.46 (d, *J* = 7.6 Hz, 1H), 7.39 (d, *J* = 7.8 Hz, 1H), 7.34 (t, *J* = 7.7 Hz, 1H), 2.64 (q, *J* = 8.6 Hz, 1H), 2.08 (ddd, *J* = 9.2, 7.8, 5.6 Hz, 1H), 1.68 (dt, *J* = 7.7, 5.4 Hz, 1H), 1.43 (ddd, *J* = 8.7, 7.8, 5.2 Hz, 1H); <sup>13</sup>C NMR (150 MHz, CDCl<sub>3</sub>) δ 176.38, 136.92, 132.59, 130.28 (q, *J* = 31.5 Hz), 128.31, 126.11 (q, *J* = 4.5 Hz), 124.11 (q, *J* = 270 Hz), 123.62 (q, *J* = 4.5 Hz), 26.06, 21.40, 12.22; <sup>19</sup>F NMR (376 MHz, CDCl<sub>3</sub>) δ -62.90.

HRMS (ESI-TOF) *m/z* Calcd for C<sub>11</sub>H<sub>10</sub>F<sub>3</sub>O<sub>2</sub><sup>+</sup> [M+H]<sup>+</sup> 231.0627, found 231.0628.

The absolute stereochemistry was assigned based on comparing the specific rotation of **3m** with literature.

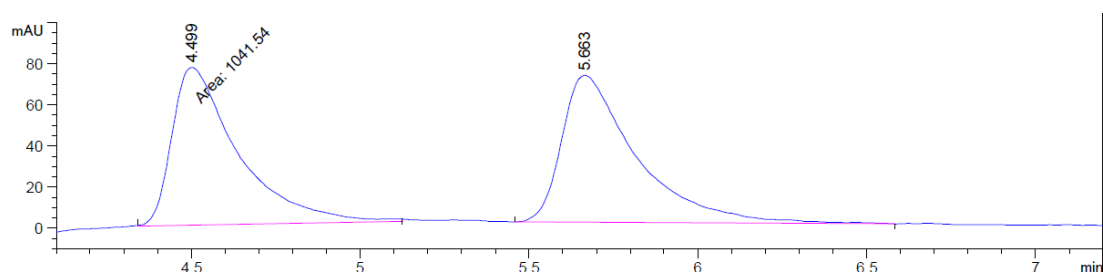

| Peak # | RetTime [min] | Type | Width [min] | Area [mAU*s] | Height [mAU] | Area %  |
|--------|---------------|------|-------------|--------------|--------------|---------|
| 1      | 4.499         | MM   | 0.2261      | 1041.54480   | 76.76731     | 48.7093 |
| 2      | 5.663         | BV R | 0.2211      | 1096.74170   | 71.42764     | 51.2907 |

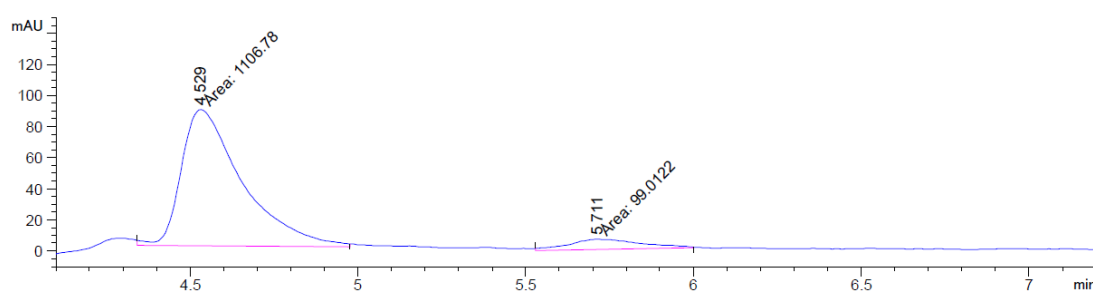

| Peak # | RetTime [min] | Type | Width [min] | Area [mAU*s] | Height [mAU] | Area %  |
|--------|---------------|------|-------------|--------------|--------------|---------|
| 1      | 4.529         | MM   | 0.2106      | 1106.78430   | 87.58733     | 91.7886 |
| 2      | 5.711         | MM   | 0.2513      | 99.01224     | 6.56730      | 8.2114  |

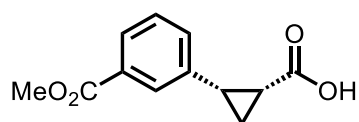

**(1R,2S)-2-(3-(methoxycarbonyl)phenyl)cyclopropane-1-carboxylic acid (3k)**

Substrate **1** was arylated following the general arylation procedure (eluent: hexane/ethyl acetate = 2/1 with 1% v/v of acetic acid). The product was obtained as a white solid (67% yield).

The enantiomeric purity of the substrate was determined by SFC analysis (CHIRALPAK® OJ-3 column, 5% *i*PrOH / CO<sub>2</sub>, flow rate 2 mL/min, retention time 4.789 min (major) and 6.673 min (minor), 95:5 er);

<sup>1</sup>H NMR (600 MHz, CDCl<sub>3</sub>) δ 7.93 (s, 1H), 7.87 (d, *J* = 7.8 Hz, 1H), 7.40 (d, *J* = 7.6 Hz, 1H), 7.30 (t, *J* = 7.7 Hz, 1H), 3.91 (s, 3H), 2.64 (q, *J* = 8.5 Hz, 1H), 2.10 – 2.03 (m, 1H), 1.70 (dt, *J* = 7.7, 5.4 Hz, 1H), 1.41 (td, *J* = 8.2, 5.1 Hz, 1H); <sup>13</sup>C NMR (150 MHz, CDCl<sub>3</sub>) δ 175.83, 167.06, 136.33, 133.70, 130.62, 129.87, 128.09, 127.97, 52.08, 26.11, 21.28, 12.15.

HRMS (ESI-TOF) *m/z*. Calcd for C<sub>12</sub>H<sub>13</sub>O<sub>4</sub><sup>+</sup> [M+H]<sup>+</sup> 221.0808, found 221.0807.

The absolute stereochemistry was assigned based on comparing the specific rotation of **3m** with literature.

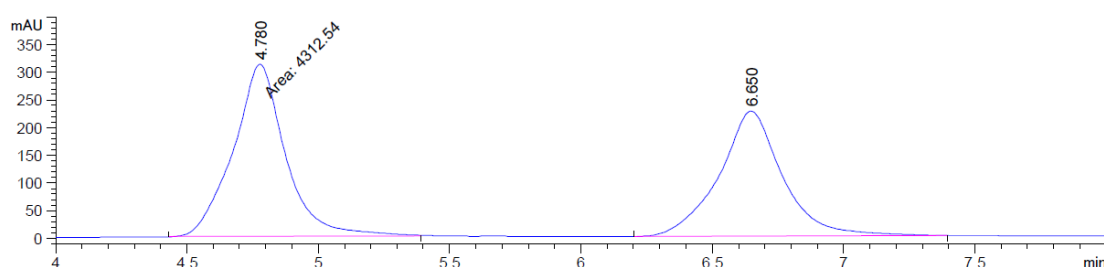

| Peak # | RetTime [min] | Type | Width [min] | Area [mAU*s] | Height [mAU] | Area %  |
|--------|---------------|------|-------------|--------------|--------------|---------|
| 1      | 4.781         | BB   | 0.1945      | 139.56223    | 10.01887     | 52.3888 |
| 2      | 6.652         | BB   | 0.2377      | 126.83482    | 7.48401      | 47.6112 |

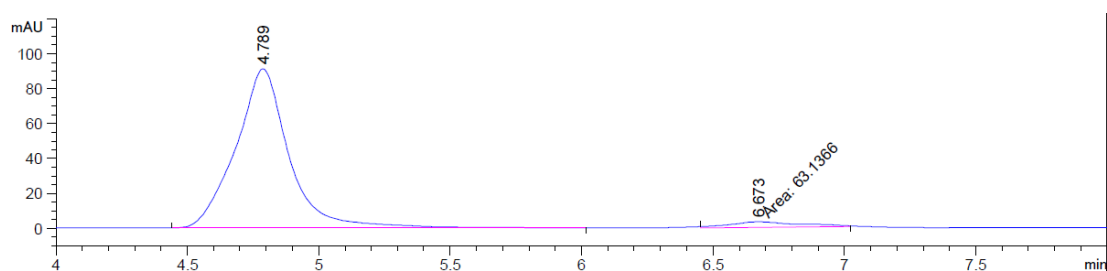

| Peak # | RetTime [min] | Type | Width [min] | Area [mAU*s] | Height [mAU] | Area %  |
|--------|---------------|------|-------------|--------------|--------------|---------|
| 1      | 4.789         | BB   | 0.1984      | 1284.97974   | 91.18695     | 95.3167 |
| 2      | 6.673         | MM   | 0.3232      | 63.13662     | 3.25587      | 4.6833  |

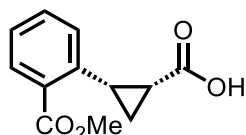

**(1R,2S)-2-(2-(methoxycarbonyl)phenyl)cyclopropane-1-carboxylic acid (3l)**

Substrate **1** was arylated following the general arylation procedure (eluent: hexane/ethyl acetate = 2/1 with 1% v/v of acetic acid). The product was obtained as a white solid (54% yield).

The enantiomeric purity of the substrate was determined by SFC analysis (CHIRALPAK® OJ-3 column, 5% *i*PrOH / CO<sub>2</sub>, flow rate 2 mL/min, retention time 3.271 min (major) and 4.985 min (minor), 99:1 er);

<sup>1</sup>H NMR (600 MHz, CDCl<sub>3</sub>) δ 7.83 (d, *J* = 7.8 Hz, 1H), 7.41 (t, *J* = 7.6 Hz, 1H), 7.32 (d, *J* = 7.7 Hz, 1H), 7.30 – 7.25 (m, 1H), 3.82 (s, 3H), 2.98 (q, *J* = 8.6 Hz, 1H), 2.12 (ddd, *J* = 9.3, 7.7, 5.4 Hz, 1H), 1.60 (dt, *J* = 8.0, 5.2 Hz, 1H), 1.43 (td, *J* = 8.1, 5.0 Hz, 1H); <sup>13</sup>C NMR (150 MHz, CDCl<sub>3</sub>) δ 177.08, 167.76, 137.61, 131.58, 131.08, 130.88, 130.08, 126.76, 51.95, 26.30, 21.71, 13.43.

HRMS (ESI-TOF) *m/z* Calcd for C<sub>12</sub>H<sub>13</sub>O<sub>4</sub><sup>+</sup> [M+H]<sup>+</sup> 221.0808, found 221.0807.

The absolute stereochemistry was assigned based on comparing the specific rotation of **3m** with literature.

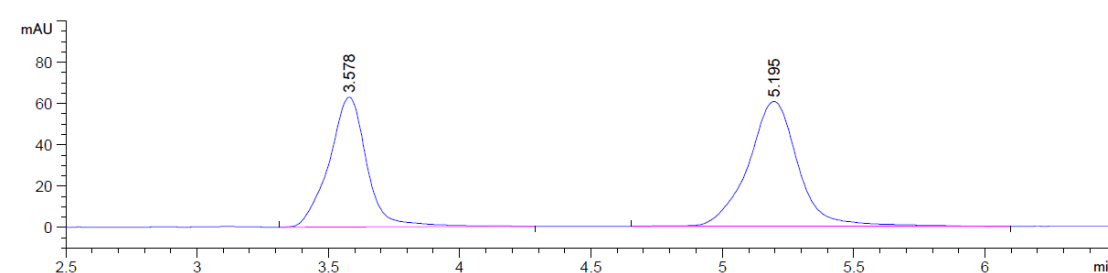

| Peak # | RetTime [min] | Type | Width [min] | Area [mAU*s] | Height [mAU] | Area %  |
|--------|---------------|------|-------------|--------------|--------------|---------|
| 1      | 3.578         | MM   | 0.1670      | 629.59418    | 62.83921     | 47.7988 |
| 2      | 5.195         | MM   | 0.1983      | 687.58069    | 57.79146     | 52.2012 |

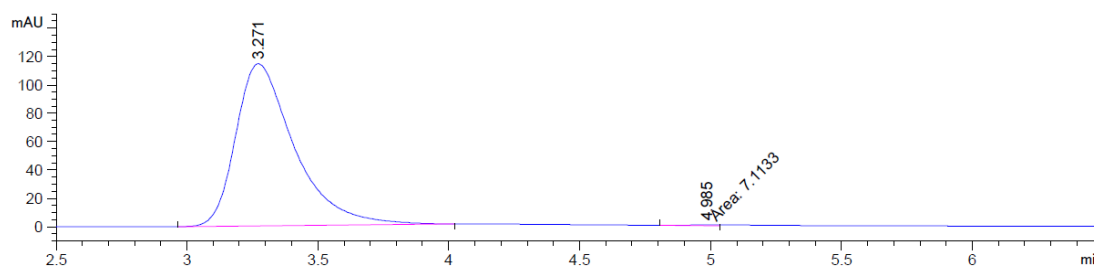

| Peak # | RetTime [min] | Type | Width [min] | Area [mAU*s] | Height [mAU] | Area %  |
|--------|---------------|------|-------------|--------------|--------------|---------|
| 1      | 3.271         | BB   | 0.2318      | 1781.41797   | 114.32291    | 99.6023 |
| 2      | 4.985         | MM   | 0.1472      | 7.11330      | 8.05398e-1   | 0.3977  |

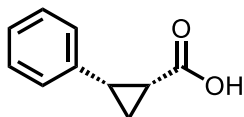

**(1R,2S)-2-phenylcyclopropane-1-carboxylic acid (3m)**

Substrate **1** was arylated following the general arylation procedure (eluent: hexane/ethyl acetate = 5/1 with 1% v/v of acetic acid). The product was obtained as a pale-yellow solid (68% yield).

The enantiomeric purity of the substrate was determined by SFC analysis (CHIRALPAK® OJ-3 column, 5% *i*PrOH / CO<sub>2</sub>, flow rate 2 mL/min, retention time 5.287 min (major) and 11.697 min (minor), 98:2 er);

<sup>1</sup>H NMR (600 MHz, CDCl<sub>3</sub>) δ 7.26 – 7.22 (m, 4H), 7.20 (td, *J* = 5.9, 2.4 Hz, 1H), 2.62 (q, *J* = 8.6 Hz, 1H), 2.04 (ddd, *J* = 9.3, 7.7, 5.6 Hz, 1H), 1.66 (dt, *J* = 7.7, 5.3 Hz, 1H), 1.37 (ddd, *J* = 8.7, 7.7, 5.0 Hz, 1H); <sup>13</sup>C NMR (150 MHz, CDCl<sub>3</sub>) δ 176.04, 135.91, 129.24, 127.94, 126.76, 26.48, 21.26, 12.00.

HRMS (ESI-TOF) *m/z* Calcd for C<sub>10</sub>H<sub>11</sub>O<sub>2</sub><sup>+</sup> [M+H]<sup>+</sup> 163.0754, found 163.0752.

The absolute stereochemistry was assigned based on comparing the specific rotation of **3m** with literature.

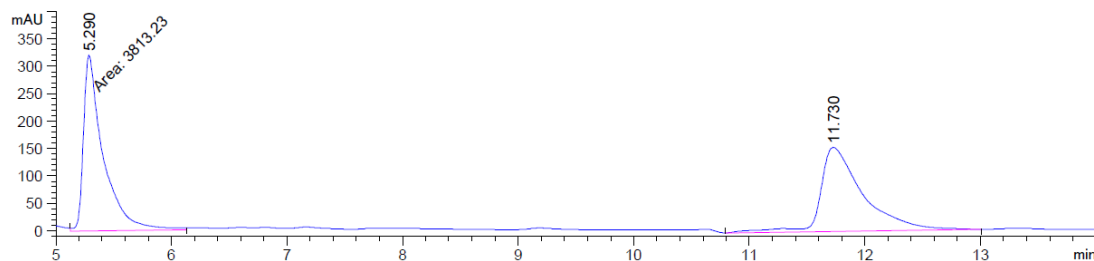

| Peak # | RetTime [min] | Type | Width [min] | Area [mAU*s] | Height [mAU] | Area %  |
|--------|---------------|------|-------------|--------------|--------------|---------|
| 1      | 5.290         | MM   | 0.1982      | 3813.23438   | 320.63879    | 49.4393 |
| 2      | 11.730        | VB R | 0.3614      | 3899.72827   | 153.09192    | 50.5607 |

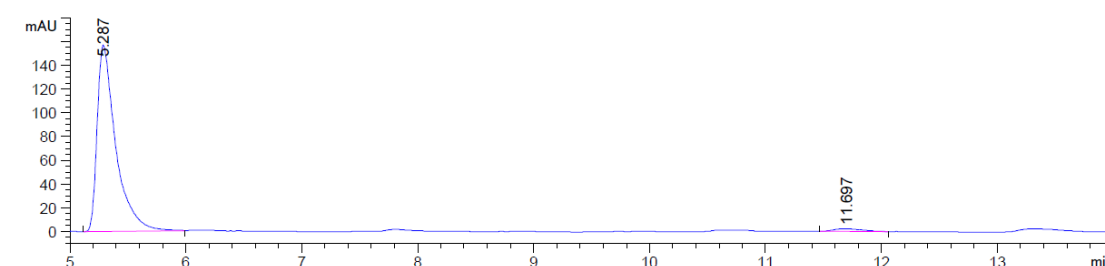

| Peak # | RetTime [min] | Type | Width [min] | Area [mAU*s] | Height [mAU] | Area %  |
|--------|---------------|------|-------------|--------------|--------------|---------|
| 1      | 5.287         | BB   | 0.1640      | 1745.86206   | 156.71941    | 97.9298 |
| 2      | 11.697        | BB   | 0.2069      | 36.90720     | 2.27959      | 2.0702  |

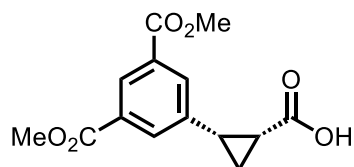

**(1R,2S)-2-(3,5-bis(methoxycarbonyl)phenyl)cyclopropanecarboxylic acid (3n)**

Substrate **1** was arylated following the general arylation procedure (eluent: hexane/ethyl acetate = 2/1 with 1% v/v of acetic acid). The product was obtained as a white solid (66% yield).

The enantiomeric purity of the substrate was determined by SFC analysis (CHIRALPAK® OJ-3 column, 5% *i*PrOH / CO<sub>2</sub>, flow rate 1 mL/min, retention time 8.903 min (major) and 10.053 min (minor), 97:3 er);

<sup>1</sup>H NMR (600 MHz, CDCl<sub>3</sub>) δ 8.51 (s, 1H), 8.10 (s, 2H), 3.93 (s, 6H), 2.66 (s, 1H), 2.13 (d, *J* = 7.4 Hz, 1H), 1.75 (s, 1H), 1.46 (s, 1H); <sup>13</sup>C NMR (150 MHz, CDCl<sub>3</sub>) δ 166.28, 161.00, 134.71, 130.27, 129.23, 116.15, 52.36, 24.68, 24.52, 12.32.

HRMS (ESI-TOF) *m/z* Calcd for C<sub>14</sub>H<sub>13</sub>O<sub>6</sub><sup>-</sup> [M-H]<sup>-</sup> 277.0712, found 277.0719.

The absolute stereochemistry was assigned based on comparing the specific rotation of **3m** with literature.

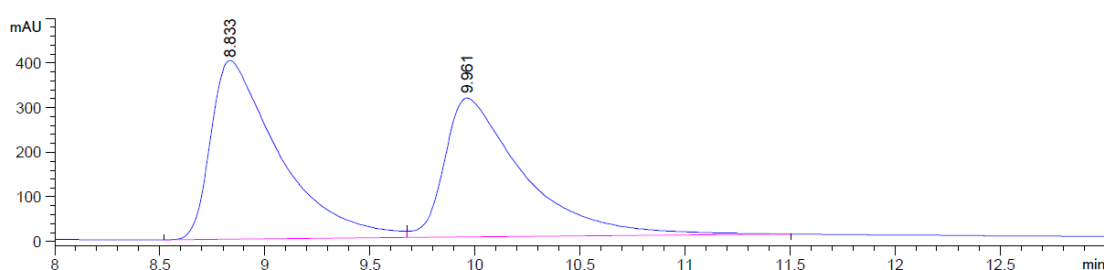

| Peak # | RetTime [min] | Type | Width [min] | Area [mAU*s] | Height [mAU] | Area %  |
|--------|---------------|------|-------------|--------------|--------------|---------|
| 1      | 8.833         | BV   | 0.3194      | 9046.69336   | 400.76804    | 52.8028 |
| 2      | 9.961         | VV R | 0.3767      | 8086.30322   | 311.68176    | 47.1972 |

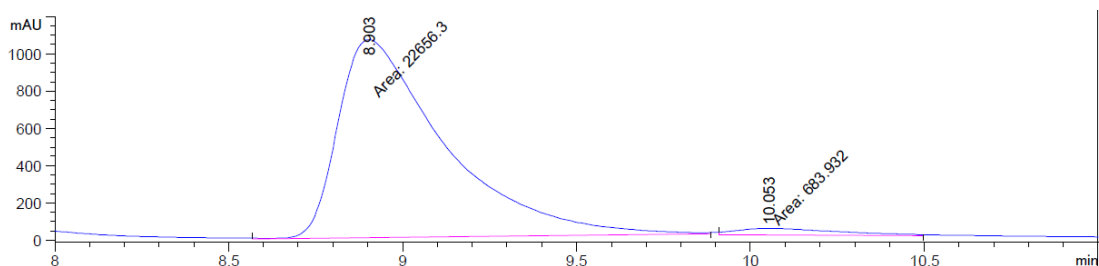

| Peak # | RetTime [min] | Type | Width [min] | Area [mAU*s] | Height [mAU] | Area %  |
|--------|---------------|------|-------------|--------------|--------------|---------|
| 1      | 8.903         | MM   | 0.3549      | 2.26563e4    | 1064.05310   | 97.0697 |
| 2      | 10.053        | MM   | 0.3360      | 683.93158    | 33.92376     | 2.9303  |

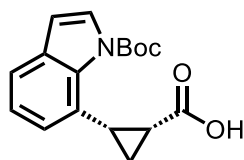

**(1R,2S)-2-(1-(tert-butoxycarbonyl)-1H-indol-7-yl)cyclopropanecarboxylic acid (3o)**

Substrate **1** was arylated following the general arylation procedure (eluent: hexane/ethyl acetate = 2/1 with 1% v/v of acetic acid). The product was obtained as a white solid (47% yield).

The enantiomeric purity of the substrate was determined by SFC analysis (CHIRALPAK® AS-3 column, 5% *i*PrOH / CO<sub>2</sub>, flow rate 1 mL/min, retention time 16.895 min (major) and 19.070 min (minor), 99:1 er);

<sup>1</sup>H NMR (600 MHz, CDCl<sub>3</sub>) δ 8.00 (s, 1H), 7.55 (d, *J* = 3.4 Hz, 1H), 7.42 (dd, *J* = 1.8, 0.9 Hz, 1H), 7.21 (dd, *J* = 8.5, 1.8 Hz, 1H), 6.49 (dd, *J* = 3.6, 0.8 Hz, 1H), 2.72 (q, *J* = 8.6 Hz, 1H), 2.08 – 2.02 (m, 1H), 1.74 – 1.70 (m, 1H), 1.66 (s, 9H), 1.41 – 1.37 (m, 1H); <sup>13</sup>C NMR (150 MHz, CDCl<sub>3</sub>) δ 180.47, 175.83, 149.77, 130.43, 130.20, 126.03, 125.72, 121.42, 114.60, 107.25, 28.19, 26.56, 21.32, 12.26, 9.05.

HRMS (ESI-TOF) *m/z* Calcd for C<sub>17</sub>H<sub>18</sub>NO<sub>4</sub> [M-H]<sup>-</sup> 300.1236, found 300.1228.

The absolute stereochemistry was assigned based on comparing the specific rotation of **3m** with literature.

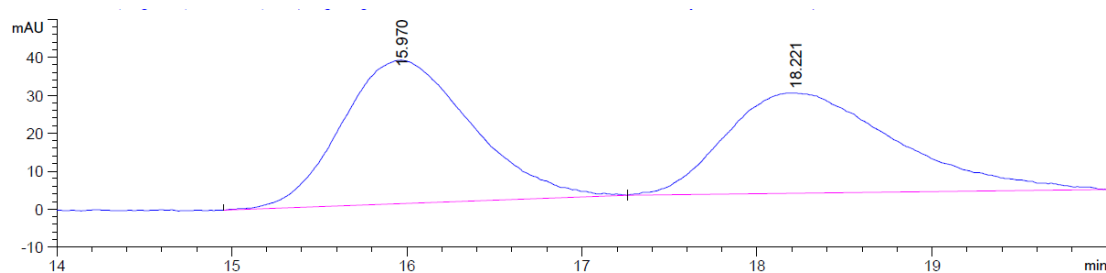

| Peak # | RetTime [min] | Type | Width [min] | Area [mAU*s] | Height [mAU] | Area %  |
|--------|---------------|------|-------------|--------------|--------------|---------|
| 1      | 15.972        | BV R | 0.6088      | 1993.61938   | 39.50036     | 51.2019 |
| 2      | 18.171        | MM   | 1.1199      | 1900.02429   | 28.27714     | 48.7981 |



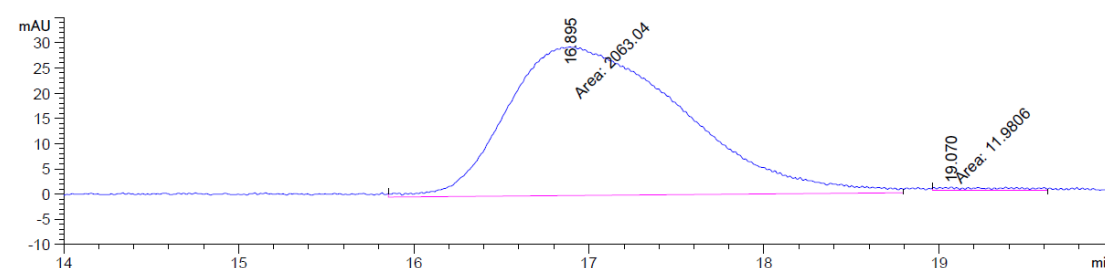

| Peak # | RetTime [min] | Type | Width [min] | Area [mAU*s] | Height [mAU] | Area %  |
|--------|---------------|------|-------------|--------------|--------------|---------|
| 1      | 16.895        | MM   | 1.1670      | 2063.04224   | 29.46432     | 99.4226 |
| 2      | 19.070        | MM   | 0.3590      | 11.98057     | 5.56213e-1   | 0.5774  |

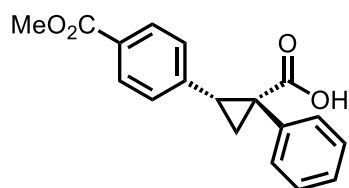

**(1R,2R)-2-(4-(methoxycarbonyl)phenyl)-1-phenylcyclopropane-1-carboxylic acid (3p)**

Substrate **1p** was arylated following the general arylation procedure (eluent: hexane/ethyl acetate = 2/1 with 1% v/v of acetic acid). The product was obtained as a white solid (64% yield).

The enantiomeric purity of the substrate was determined by SFC analysis (CHIRALPAK® AD-3 column, 20% *i*PrOH / CO<sub>2</sub>, flow rate 2 mL/min, retention time 6.300 min (major) and 7.776 min (minor), 98:2 er);

<sup>1</sup>H NMR (600 MHz, CDCl<sub>3</sub>) δ 7.96 (d, *J* = 8.3 Hz, 2H), 7.48 – 7.41 (m, 2H), 7.35 (td, *J* = 7.9, 5.7 Hz, 4H), 7.31 – 7.27 (m, 1H), 3.93 (s, 3H), 2.89 (t, *J* = 8.4 Hz, 1H), 2.26 (dd, *J* = 7.8, 5.0 Hz, 1H), 1.70 (dd, *J* = 9.0, 5.0 Hz, 1H); <sup>13</sup>C NMR (150 MHz, CDCl<sub>3</sub>) δ 175.85, 167.05, 141.33, 139.32, 130.19, 129.37, 129.20, 128.66, 128.38, 127.66, 52.06, 37.83, 34.38, 19.25.

HRMS (ESI-TOF) *m/z*. Calcd for C<sub>18</sub>H<sub>16</sub>O<sub>4</sub>Na<sup>+</sup> [M+Na]<sup>+</sup> 319.0941, found 319.0943.

The absolute stereochemistry was assigned based on comparing the specific rotation of **3m** with literature.

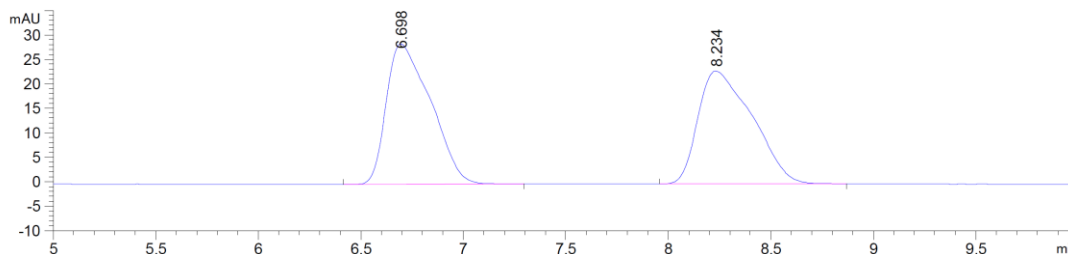

| Peak # | RetTime [min] | Type | Width [min] | Area [mAU*s] | Height [mAU] | Area %  |
|--------|---------------|------|-------------|--------------|--------------|---------|
| 1      | 6.698         | BB   | 0.2132      | 431.89594    | 28.76545     | 50.3701 |
| 2      | 8.234         | BB   | 0.2627      | 425.54874    | 23.11917     | 49.6299 |

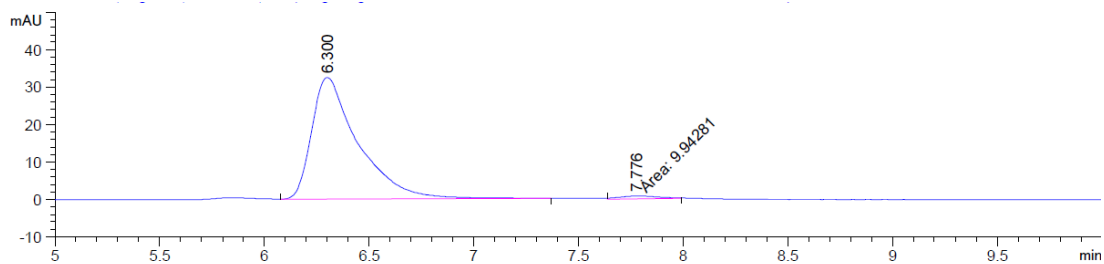

| Peak # | RetTime [min] | Type | Width [min] | Area [mAU*s] | Height [mAU] | Area %  |
|--------|---------------|------|-------------|--------------|--------------|---------|
| 1      | 6.300         | BB   | 0.2215      | 500.26663    | 32.50945     | 98.0512 |
| 2      | 7.776         | MM   | 0.2147      | 9.94281      | 7.71851e-1   | 1.9488  |

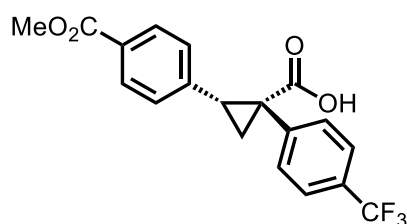

**(1R,2R)-2-(4-(methoxycarbonyl)phenyl)-1-(4-(trifluoromethyl)phenyl)cyclopropane-1-carboxylic acid (3q)**

Substrate **1q** was arylated following the general arylation procedure (eluent: hexane/ethyl acetate = 2/1 with 1% v/v of acetic acid). The product was obtained as a white solid (69% yield).

The enantiomeric purity of the substrate was determined by SFC analysis (CHIRALPAK® AD-3 column, 20% *i*PrOH / CO<sub>2</sub>, flow rate 2 mL/min, retention time 2.741 min (major) and 3.339 min (minor), 97:3 er);

<sup>1</sup>H NMR (600 MHz, CDCl<sub>3</sub>) δ 7.96 (d, *J* = 8.4 Hz, 2H), 7.60 (d, *J* = 8.1 Hz, 2H), 7.55 (d, *J* = 8.1 Hz, 2H), 7.35 (d, *J* = 8.0 Hz, 2H), 3.93 (s, 3H), 2.88 (t, *J* = 8.5 Hz, 1H), 2.31 (dd, *J* = 7.9, 5.2 Hz, 1H), 1.72 (dd, *J* = 9.0, 5.2 Hz, 1H); <sup>13</sup>C NMR (150 MHz, CDCl<sub>3</sub>) δ 175.49, 167.02, 143.07, 140.67, 130.63, 129.87 (q, *J* = 33.0 Hz), 129.98, 129.76, 129.54, 129.43, 129.18, 128.87, 125.35 (q, *J* = 3.0 Hz), 123.97 (q, *J* = 270 Hz), 52.12, 37.41, 34.51, 19.20; <sup>19</sup>F NMR (376 MHz, CDCl<sub>3</sub>) δ -62.82.

HRMS (ESI-TOF) *m/z* Calcd for C<sub>19</sub>H<sub>16</sub>F<sub>3</sub>O<sub>4</sub><sup>+</sup> [M+H]<sup>+</sup> 365.0995, found 365.0994.

The absolute stereochemistry was assigned based on comparing the specific rotation of **3m** with literature.

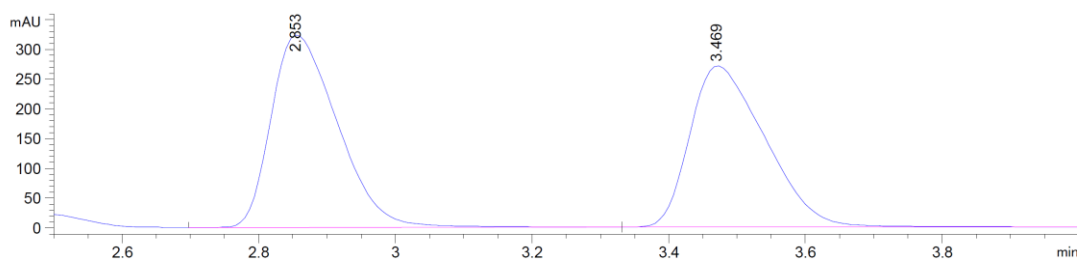

| Peak # | RetTime [min] | Type | Width [min] | Area [mAU*s] | Height [mAU] | Area %  |
|--------|---------------|------|-------------|--------------|--------------|---------|
| 1      | 2.853         | BB   | 0.1063      | 2174.49072   | 323.80118    | 51.2016 |
| 2      | 3.469         | BB   | 0.1233      | 2072.42944   | 270.79803    | 48.7984 |

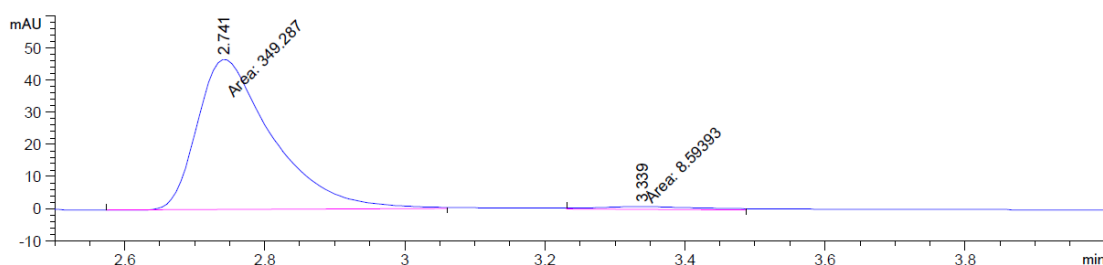

| Peak # | RetTime [min] | Type | Width [min] | Area [mAU*s] | Height [mAU] | Area %  |
|--------|---------------|------|-------------|--------------|--------------|---------|
| 1      | 2.741         | MM   | 0.1243      | 349.28665    | 46.85023     | 97.5987 |
| 2      | 3.339         | MM   | 0.1612      | 8.59393      | 8.88326e-1   | 2.4013  |

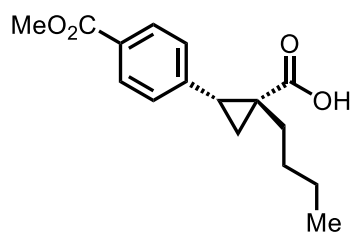

**(1R,2R)-1-butyl-2-(4-(methoxycarbonyl)phenyl)cyclopropane-1-carboxylic acid (3r)**

Substrate **1r** was arylated following the general arylation procedure (eluent: hexane/ethyl acetate = 2/1 with 1% v/v of acetic acid). The product was obtained as a pale-yellow solid (63% yield).

The enantiomeric purity of the substrate was determined by SFC analysis (CHIRALPAK® AD-3 column, 20% *i*PrOH / CO<sub>2</sub>, flow rate 2 mL/min, retention time 3.240 min (major) and 3.738 min (minor), 95:5 er);

<sup>1</sup>H NMR (600 MHz, CDCl<sub>3</sub>) δ 7.89 (d, *J* = 8.4 Hz, 2H), 7.21 (d, *J* = 8.2 Hz, 2H), 3.90 (s, 3H), 2.38 (t, *J* = 8.0 Hz, 1H), 2.06 – 1.98 (m, 1H), 1.88 (ddd, *J* = 7.5, 5.0, 1.0 Hz, 1H), 1.52 – 1.39 (m, 2H), 1.35 – 1.26 (m, 3H), 1.18 (dd, *J* = 8.7, 5.1 Hz, 1H), 0.91 (t, *J* = 7.3 Hz, 3H); <sup>13</sup>C NMR (150 MHz, CDCl<sub>3</sub>) δ 177.71, 167.10, 142.12, 129.14, 129.02, 128.22, 35.27, 33.44, 33.23, 29.74, 22.72, 18.63, 13.93.

HRMS (ESI-TOF) *m/z* Calcd for C<sub>16</sub>H<sub>20</sub>O<sub>4</sub><sup>+</sup> [M+H]<sup>+</sup> 277.1434, found 277.1437.

The absolute stereochemistry was assigned based on comparing the specific rotation of **3m** with literature.

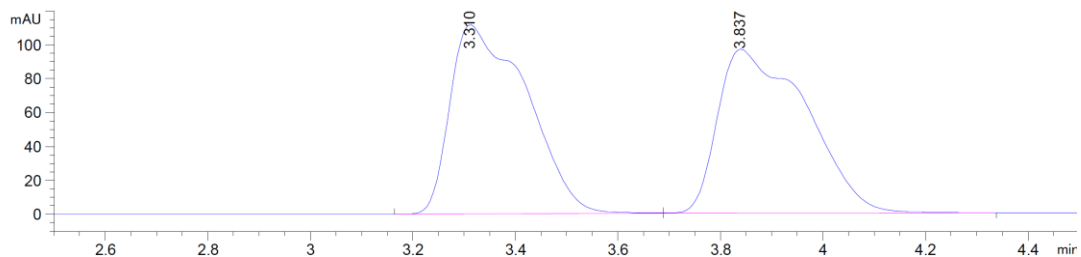

| Peak # | RetTime [min] | Type | Width [min] | Area [mAU*s] | Height [mAU] | Area %  |
|--------|---------------|------|-------------|--------------|--------------|---------|
| 1      | 3.310         | BV   | 0.1411      | 1157.89111   | 111.58231    | 49.9134 |
| 2      | 3.837         | VB   | 0.1621      | 1161.91125   | 96.72337     | 50.0866 |

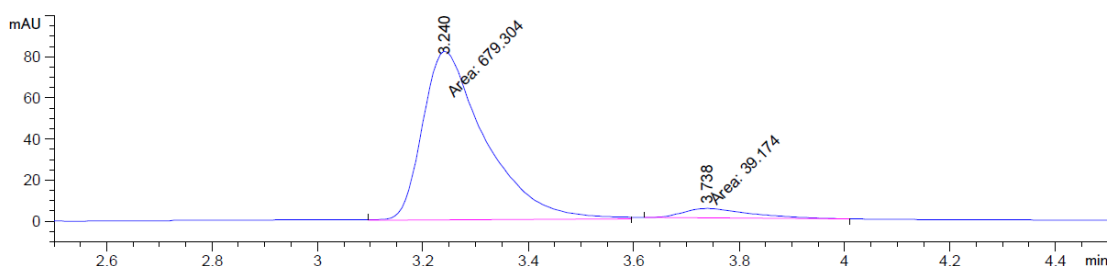

| Peak # | RetTime [min] | Type | Width [min] | Area [mAU*s] | Height [mAU] | Area %  |
|--------|---------------|------|-------------|--------------|--------------|---------|
| 1      | 3.240         | MM   | 0.1378      | 679.30371    | 82.13483     | 94.5476 |
| 2      | 3.738         | MM   | 0.1443      | 39.17395     | 4.52614      | 5.4524  |

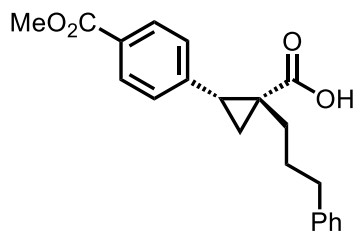

**(1R,2R)-2-(4-(methoxycarbonyl)phenyl)-1-(3-phenylpropyl)cyclopropane-1-carboxylic acid (3s)**

Substrate **1s** was arylated following the general arylation procedure (eluent: hexane/ethyl acetate = 2/1 with 1% v/v of acetic acid). The product was obtained as a pale-yellow oil (44% yield).

The enantiomeric purity of the substrate was determined by SFC analysis (CHIRALPAK® AD-3 column, 20% <sup>i</sup>PrOH / CO<sub>2</sub>, flow rate 2 mL/min, retention time 7.675 min (major) and 8.768 min (minor), 96:4 er);

<sup>1</sup>H NMR (600 MHz, CDCl<sub>3</sub>) δ 7.88 (d, *J* = 8.3 Hz, 2H), 7.28 (t, *J* = 7.6 Hz, 2H), 7.22 – 7.15 (m, 5H), 3.88 (s, 3H), 2.63 (t, *J* = 7.7 Hz, 2H), 2.36 (t, *J* = 8.1 Hz, 1H), 2.05 (ddd, *J* = 13.7, 10.9, 5.1 Hz, 1H), 1.93 – 1.76 (m, 3H), 1.37 (ddd, *J* = 13.8, 11.0, 5.2 Hz, 1H), 1.16 (dd, *J* =

8.7, 5.0 Hz, 1H);  $^{13}\text{C}$  NMR (150 MHz,  $\text{CDCl}_3$ )  $\delta$  177.54, 167.08, 141.97, 141.91, 129.15, 129.05, 128.31, 128.29, 125.77, 51.97, 35.78, 35.14, 33.55, 32.98, 29.17, 18.78.

HRMS (ESI-TOF)  $m/z$  Calcd for  $\text{C}_{21}\text{H}_{23}\text{O}_4^+$   $[\text{M}+\text{H}]^+$  339.1591, found 339.1595.

The absolute stereochemistry was assigned based on comparing the specific rotation of **3m** with literature.

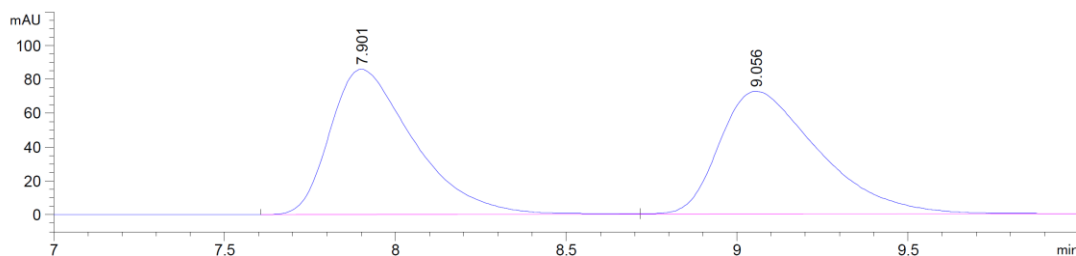

| Peak # | RetTime [min] | Type | Width [min] | Area [mAU*s] | Height [mAU] | Area %  |
|--------|---------------|------|-------------|--------------|--------------|---------|
| 1      | 7.901         | BV   | 0.2568      | 1463.35474   | 85.87017     | 50.0170 |
| 2      | 9.056         | VBA  | 0.3032      | 1462.35803   | 72.52623     | 49.9830 |

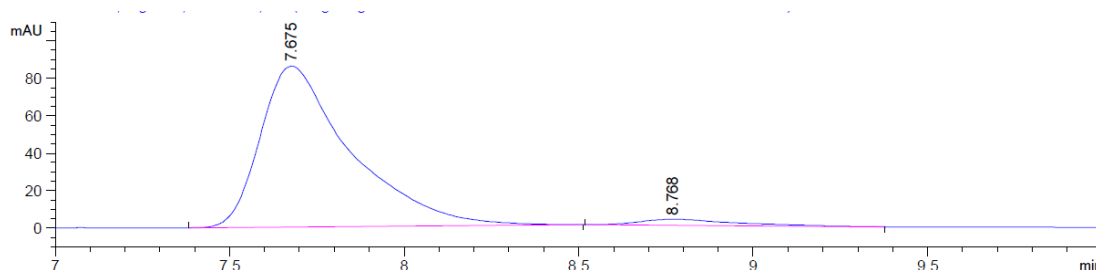

| Peak # | RetTime [min] | Type | Width [min] | Area [mAU*s] | Height [mAU] | Area %  |
|--------|---------------|------|-------------|--------------|--------------|---------|
| 1      | 7.675         | BB   | 0.2599      | 1545.83704   | 85.93114     | 96.1478 |
| 2      | 8.768         | BB   | 0.2778      | 61.93466     | 3.19981      | 3.8522  |

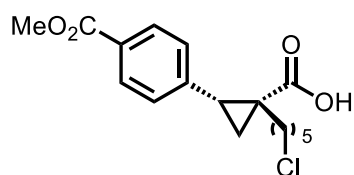

**(1R,2R)-1-(5-chloropentyl)-2-(4-(methoxycarbonyl)phenyl)cyclopropane-1-carboxylic acid (3t)**

Substrate **1t** was arylated following the general arylation procedure (eluent: hexane/ethyl acetate = 2/1 with 1% v/v of acetic acid). The product was obtained as a pale-yellow oil (62% yield).

The enantiomeric purity of the substrate was determined by SFC analysis (CHIRALPAK<sup>®</sup> AD-3 column, 20%  $i$ PrOH /  $\text{CO}_2$ , flow rate 2 mL/min, retention time 4.489 min (major) and 5.300 min (minor), 96:4 er);

$^1\text{H}$  NMR (600 MHz,  $\text{CDCl}_3$ )  $\delta$  7.89 (d,  $J = 8.4$  Hz, 2H), 7.22 (d,  $J = 8.1$  Hz, 2H), 3.90 (s, 3H), 3.53 (t,  $J = 6.7$  Hz, 2H), 2.39 (t,  $J = 8.1$  Hz, 1H), 2.04 (ddd,  $J = 14.5, 10.6, 4.2$  Hz, 1H), 1.92 – 1.86 (m, 1H), 1.79 (p,  $J = 6.8$  Hz, 2H), 1.57 – 1.42 (m, 4H), 1.33 (ddd,  $J = 13.8, 10.5, 5.4$  Hz, 1H), 1.20 (dd,  $J = 8.7, 5.1$  Hz, 1H);  $^{13}\text{C}$  NMR (150 MHz,  $\text{CDCl}_3$ )  $\delta$  177.61, 167.06, 141.89, 129.14, 129.03, 128.28, 51.98, 44.95, 35.36, 33.53, 33.01, 32.34, 26.86, 26.82, 18.72.

HRMS (ESI-TOF)  $m/z$  Calcd for  $\text{C}_{17}\text{H}_{22}\text{ClO}_4^+$   $[\text{M}+\text{H}]^+$  325.1201, found 325.1205.

The absolute stereochemistry was assigned based on comparing the specific rotation of **3m** with literature.

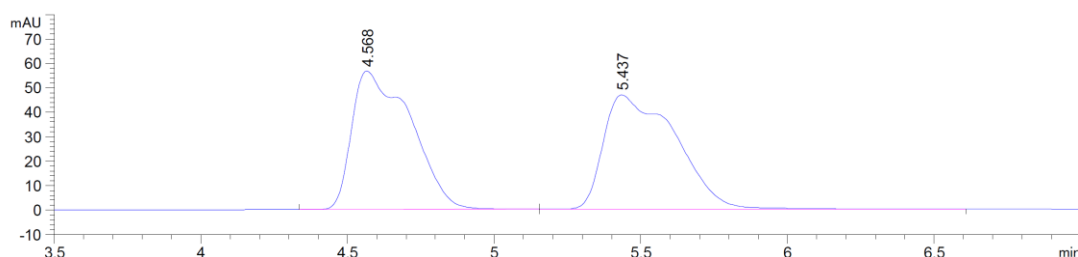

| Peak # | RetTime [min] | Type | Width [min] | Area [mAU*s] | Height [mAU] | Area %  |
|--------|---------------|------|-------------|--------------|--------------|---------|
| 1      | 4.568         | BB   | 0.1887      | 791.70410    | 56.76482     | 49.7234 |
| 2      | 5.437         | BB   | 0.2299      | 800.51172    | 46.70959     | 50.2766 |

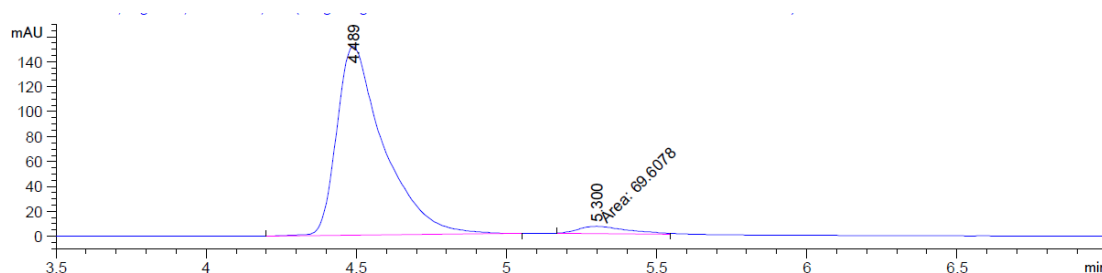

| Peak # | RetTime [min] | Type | Width [min] | Area [mAU*s] | Height [mAU] | Area %  |
|--------|---------------|------|-------------|--------------|--------------|---------|
| 1      | 4.489         | BB   | 0.1568      | 1645.09912   | 151.36237    | 95.9405 |
| 2      | 5.300         | MM   | 0.1949      | 69.60776     | 5.95382      | 4.0595  |

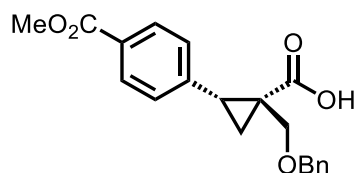

**(1R,2R)-1-((benzyloxy)methyl)-2-(4-(methoxycarbonyl)phenyl)cyclopropane-1-carboxylic acid (**3u**)**

Substrate **1u** was arylated following the general arylation procedure (eluent: hexane/ethyl acetate = 2/1 with 1% v/v of acetic acid). The product was obtained as a pale-yellow solid (57% yield).

The enantiomeric purity of the substrate was determined by SFC analysis (CHIRALPAK® AS-3 column, 20% *i*PrOH / CO<sub>2</sub>, flow rate 2 mL/min, retention time 2.835 min (major) and 3.830 min (minor), 98:2 er);

<sup>1</sup>H NMR (600 MHz, CDCl<sub>3</sub>) δ 7.90 (d, *J* = 8.0 Hz, 2H), 7.37 – 7.27 (m, 5H), 7.24 (d, *J* = 8.0 Hz, 2H), 4.58 (s, 2H), 3.87 (d, *J* = 12.2 Hz, 4H), 3.59 (d, *J* = 10.1 Hz, 1H), 2.58 (t, *J* = 8.3 Hz, 1H), 1.96 (dd, *J* = 7.7, 5.1 Hz, 1H), 1.41 (dd, *J* = 8.9, 5.1 Hz, 1H); <sup>13</sup>C NMR (150 MHz, CDCl<sub>3</sub>) δ 175.29, 167.00, 141.19, 137.70, 129.23, 129.13, 128.53, 128.43, 127.78, 127.68, 73.15, 71.85, 51.98, 32.79, 31.00, 16.76.

HRMS (ESI-TOF) *m/z* Calcd for C<sub>20</sub>H<sub>21</sub>O<sub>5</sub><sup>+</sup> [M+H]<sup>+</sup> 341.1383, found 341.1383.

The absolute stereochemistry was assigned based on comparing the specific rotation of **3m** with literature.

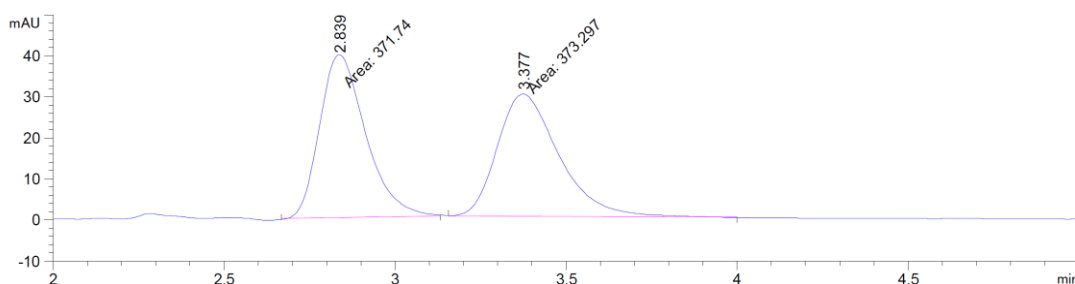

| Peak # | RetTime [min] | Type | Width [min] | Area [mAU*s] | Height [mAU] | Area %  |
|--------|---------------|------|-------------|--------------|--------------|---------|
| 1      | 2.839         | MM   | 0.1558      | 371.74030    | 39.76003     | 49.8956 |
| 2      | 3.377         | MM   | 0.2087      | 373.29666    | 29.81713     | 50.1044 |

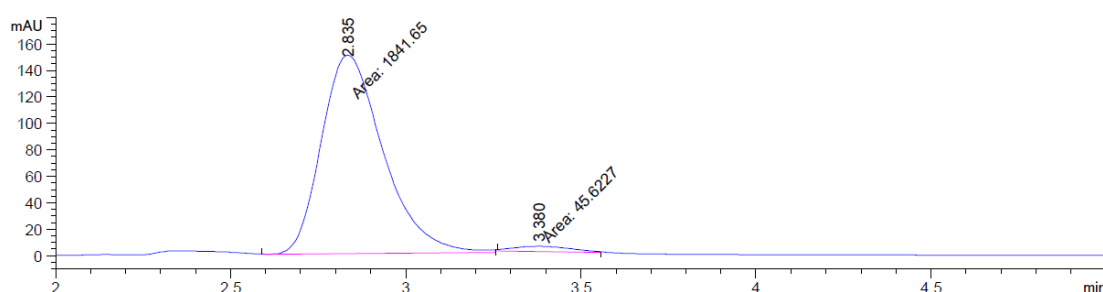

| Peak # | RetTime [min] | Type | Width [min] | Area [mAU*s] | Height [mAU] | Area %  |
|--------|---------------|------|-------------|--------------|--------------|---------|
| 1      | 2.835         | MM   | 0.2044      | 1841.64624   | 150.13182    | 97.5826 |
| 2      | 3.380         | MM   | 0.1923      | 45.62273     | 3.95362      | 2.4174  |

### 3.6 Enantioselective Arylation of Cyclobutanecarboxylic acid

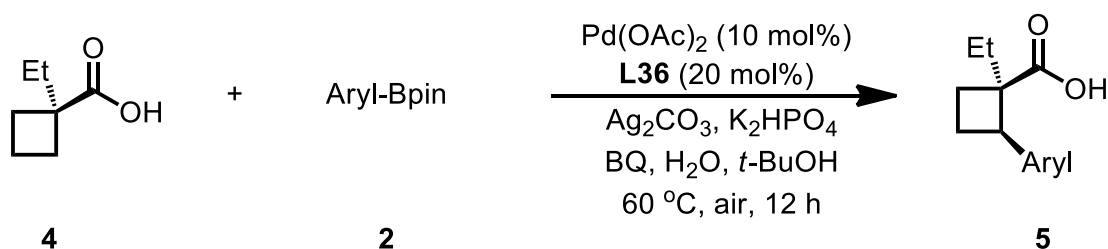

### General procedure for enantioselective arylation of cyclobutanecarboxylic acid:

A 2-dram vial equipped with a magnetic stir bar was charged with Pd(OAc)<sub>2</sub> (2.2 mg, 10 mol%) and **L36** (7.4 mg, 20 mol%) in *t*-BuOH (1.0 ml) and then stirred at the rate of 300 rpm at room temperature for 5 min. The appropriate cyclopropanecarboxylic acid substrate (0.10 mmol), Ag<sub>2</sub>CO<sub>3</sub> (55.2 mg, 0.2 mmol), K<sub>2</sub>HPO<sub>4</sub> (26.0 mg, 0.15 mmol), Aryl-Bpin (0.15 mmol), BQ (5.4 mg, 0.05 mmol), H<sub>2</sub>O (9.0 mg, 0.5 mmol) was then added. Subsequently the vial was capped and closed tightly. The reaction mixture was then stirred at the rate of 300 rpm at 60 °C for 12 h. After being allowed to cool to room temperature, the mixture was diluted with ethyl acetate and 0.1 ml of acetic acid was then added. The mixture was passed through a pad of Celite with ethyl acetate as the eluent to remove any insoluble precipitate. The resulting solution was concentrated, and the residual mixture was dissolved with a minimal amount of acetone and loaded onto a preparative TLC plate. The pure product was then isolated using preparative TLC with ethyl acetate and hexane (1/4 to 1/1) as the eluent and 1% v/v of acetic acid as additive.

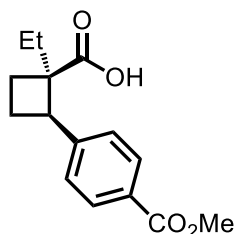

### (1R,2R)-1-ethyl-2-(4-(methoxycarbonyl)phenyl)cyclobutanecarboxylic acid (**5a**)

Substrate **4** was arylated following the general arylation procedure (eluent: hexane/ethyl acetate = 2/1 with 1% v/v of acetic acid). The product was obtained as a pale-yellow solid (62% yield).

The enantiomeric purity of the substrate was determined by SFC analysis (CHIRALPAK® AS-3 column, 15% *i*PrOH / CO<sub>2</sub>, flow rate 1 mL/min, retention time 4.910 min (minor) and 5.923 min (major), 94:6 er); [α]<sub>D</sub><sup>20</sup> = -11.8 (c = 1.0, CHCl<sub>3</sub>).

<sup>1</sup>H NMR (600 MHz, CDCl<sub>3</sub>) δ 7.94 (d, *J* = 8.4 Hz, 2H), 7.24 (d, *J* = 8.2 Hz, 2H), 3.89 (s, 3H), 3.57 (t, *J* = 8.9 Hz, 1H), 2.54 (td, *J* = 10.5, 3.9 Hz, 1H), 2.50 – 2.43 (m, 1H), 2.24 (dtd, *J* = 11.5, 8.9, 3.9 Hz, 1H), 2.17 (dt, *J* = 14.4, 7.2 Hz, 1H), 1.92 – 1.86 (m, 1H), 1.79 – 1.73 (m, 1H), 0.86 (t, *J* = 7.4 Hz, 3H); <sup>13</sup>C NMR (150 MHz, CDCl<sub>3</sub>) δ 177.15, 167.05, 145.89, 129.45, 128.45, 127.33, 56.43, 51.98, 50.03, 32.25, 25.37, 21.18, 9.08.

HRMS (ESI-TOF) *m/z* Calcd for C<sub>15</sub>H<sub>17</sub>O<sub>4</sub><sup>-</sup> [M-H] 261.1127, found 261.1132.

The absolute stereochemistry was assigned based on comparing the specific rotation of **5u** with literature.



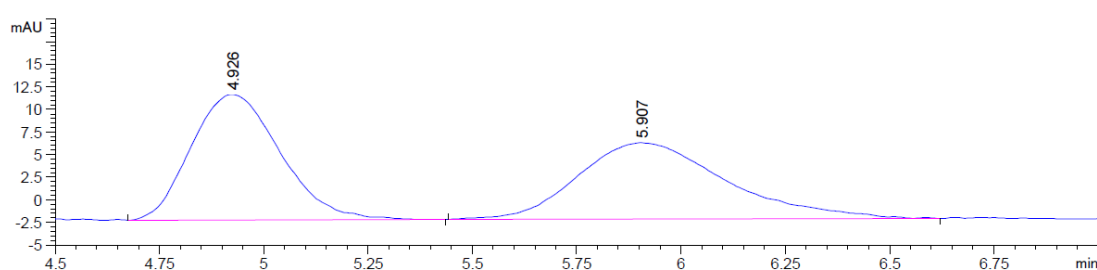

| Peak # | RetTime [min] | Type | Width [min] | Area [mAU*s] | Height [mAU] | Area %  |
|--------|---------------|------|-------------|--------------|--------------|---------|
| 1      | 4.926         | BB   | 0.2330      | 206.27145    | 13.90880     | 49.7158 |
| 2      | 5.907         | BB   | 0.3484      | 208.62941    | 8.43910      | 50.2842 |

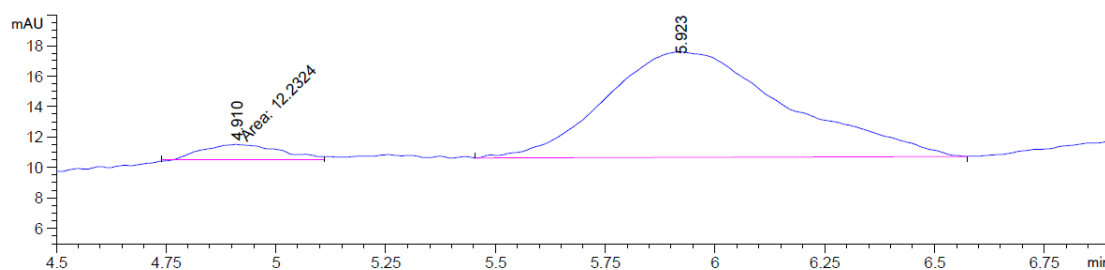

| Peak # | RetTime [min] | Type | Width [min] | Area [mAU*s] | Height [mAU] | Area %  |
|--------|---------------|------|-------------|--------------|--------------|---------|
| 1      | 4.910         | MM   | 0.2084      | 12.23242     | 9.78333e-1   | 5.8295  |
| 2      | 5.923         | BB   | 0.3590      | 197.60303    | 6.92348      | 94.1705 |

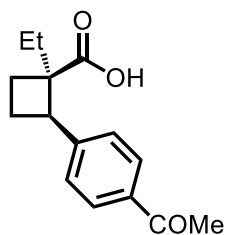

**(1R,2R)-2-(4-acetylphenyl)-1-ethylcyclobutanecarboxylic acid (5b)**

Substrate **4** was arylated following the general arylation procedure (eluent: hexane/ethyl acetate = 2/1 with 1% v/v of acetic acid). The product was obtained as a colorless oil (65% yield).

The enantiomeric purity of the substrate was determined by SFC analysis (CHIRALPAK® OJ-3 column, 5% *i*PrOH / CO<sub>2</sub>, flow rate 2 mL/min, retention time 4.255 min (minor) and 5.859 min (major), 93:7 er);

<sup>1</sup>H NMR (600 MHz, CDCl<sub>3</sub>) δ 7.86 (d, *J* = 8.3 Hz, 2H), 7.26 (s, 2H), 3.57 (t, *J* = 8.8 Hz, 1H), 2.57 (s, 3H), 2.54 (dd, *J* = 10.9, 4.1 Hz, 1H), 2.47 (dd, *J* = 11.2, 8.8 Hz, 1H), 2.27 – 2.23 (m, 1H), 2.17 (d, *J* = 6.2 Hz, 1H), 1.92 – 1.87 (m, 1H), 1.77 (dd, *J* = 13.6, 7.2 Hz, 1H), 0.86 (t, *J* = 7.4 Hz, 3H); <sup>13</sup>C NMR (150 MHz, CDCl<sub>3</sub>) δ 197.86, 177.29, 146.20, 135.55, 128.26, 127.52,

56.43, 50.01, 32.27, 26.54, 25.41, 21.22, 9.10.

HRMS (ESI-TOF)  $m/z$  Calcd for  $C_{15}H_{17}O_3^-$   $[M-H]^-$  261.1127, found 261.1132.

The absolute stereochemistry was assigned based on comparing the specific rotation of **5u** with literature.

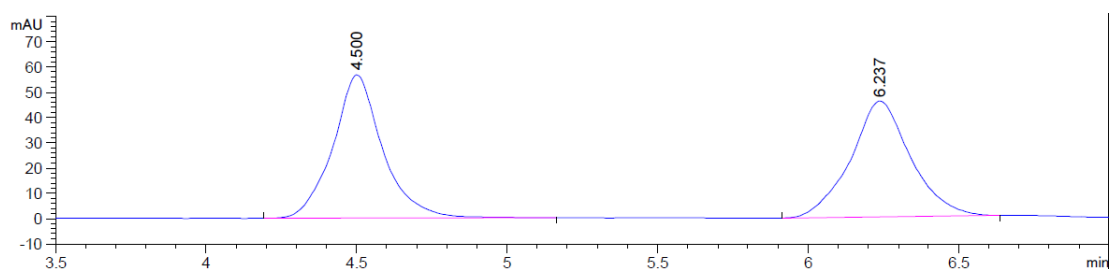

| Peak # | RetTime [min] | Type | Width [min] | Area [mAU*s] | Height [mAU] | Area %  |
|--------|---------------|------|-------------|--------------|--------------|---------|
| 1      | 4.500         | BB   | 0.1665      | 653.67517    | 56.71861     | 50.7258 |
| 2      | 6.237         | BB   | 0.1997      | 634.97046    | 45.81872     | 49.2742 |

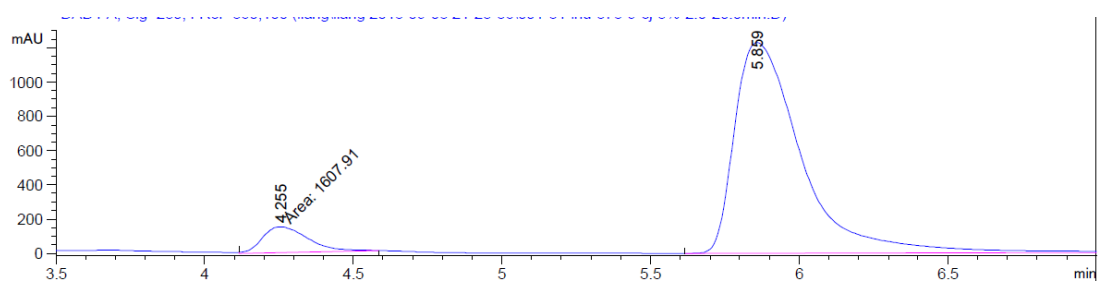

| Peak # | RetTime [min] | Type | Width [min] | Area [mAU*s] | Height [mAU] | Area %  |
|--------|---------------|------|-------------|--------------|--------------|---------|
| 1      | 4.255         | MM   | 0.1771      | 1607.90540   | 151.29349    | 7.5327  |
| 2      | 5.859         | BV R | 0.2455      | 1.97379e4    | 1229.25208   | 92.4673 |

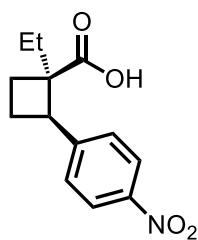

**(1R,2R)-1-ethyl-2-(4-nitrophenyl)cyclobutanecarboxylic acid (5c)**

Substrate **4** was arylated following the general arylation procedure (eluent: hexane/ethyl acetate = 2/1 with 1% v/v of acetic acid). The product was obtained as a pale-yellow solid (43% yield).

The enantiomeric purity of the substrate was determined by SFC analysis (CHIRALPAK® OJ-3 column, 5% *i*PrOH / CO<sub>2</sub>, flow rate 1 mL/min, retention time 9.557 min (minor) and 10.402 min (major), 94:6 er);

$^1\text{H}$  NMR (600 MHz,  $\text{CDCl}_3$ )  $\delta$  8.13 (d,  $J = 8.7$  Hz, 2H), 7.32 (d,  $J = 8.3$  Hz, 2H), 3.61 (t,  $J = 8.8$  Hz, 1H), 2.57 – 2.53 (m, 1H), 2.49 – 2.43 (m, 1H), 2.29 (ddd,  $J = 9.1, 7.1, 4.4$  Hz, 1H), 2.19 – 2.15 (m, 1H), 1.95 – 1.91 (m, 1H), 1.80 – 1.75 (m, 1H), 0.86 (t,  $J = 7.4$  Hz, 3H);  $^{13}\text{C}$  NMR (150 MHz,  $\text{CDCl}_3$ )  $\delta$  177.10, 148.26, 146.72, 128.12, 123.35, 56.52, 49.63, 32.24, 25.39, 21.23, 9.03.

HRMS (ESI-TOF)  $m/z$  Calcd for  $\text{C}_{13}\text{H}_{14}\text{NO}_4^-$  [M-H] $^-$  248.0923, found 248.0923.

The absolute stereochemistry was assigned based on comparing the specific rotation of **5u** with literature.

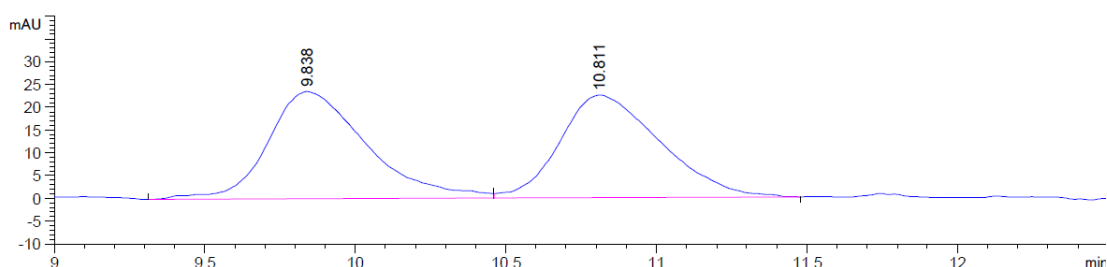

| Peak # | RetTime [min] | Type | Width [min] | Area [mAU*s] | Height [mAU] | Area %  |
|--------|---------------|------|-------------|--------------|--------------|---------|
| 1      | 9.838         | BV   | 0.3208      | 539.44019    | 23.58702     | 50.7821 |
| 2      | 10.811        | VB   | 0.3290      | 522.82501    | 22.50610     | 49.2179 |

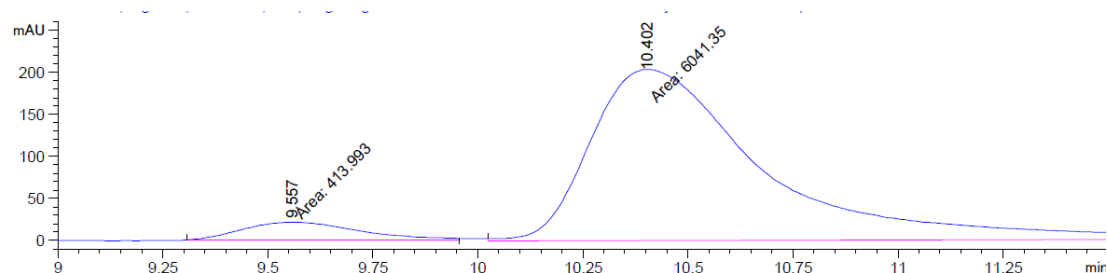

| Peak # | RetTime [min] | Type | Width [min] | Area [mAU*s] | Height [mAU] | Area %  |
|--------|---------------|------|-------------|--------------|--------------|---------|
| 1      | 9.557         | MM   | 0.3248      | 413.99335    | 21.24576     | 6.4132  |
| 2      | 10.402        | MM   | 0.4934      | 6041.35449   | 204.07893    | 93.5868 |

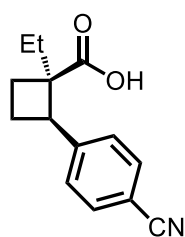

**(1R,2R)-2-(4-cyanophenyl)-1-ethylcyclobutanecarboxylic acid (5d)**

Substrate **4** was arylated following the general arylation procedure (eluent: hexane/ethyl acetate = 2/1 with 1% v/v of acetic acid). The product was obtained as a white solid (50%

yield).

The enantiomeric purity of the substrate was determined by SFC analysis (CHIRALPAK® AS-3 column, 5% <sup>i</sup>PrOH / CO<sub>2</sub>, flow rate 2 mL/min, retention time 4.597 min (minor) and 6.464 min (major), 95:5 er);

<sup>1</sup>H NMR (600 MHz, CDCl<sub>3</sub>) δ 7.54 (d, *J* = 8.3 Hz, 2H), 7.25 (d, *J* = 8.2 Hz, 2H), 3.55 (t, *J* = 8.8 Hz, 1H), 2.51 (ddd, *J* = 11.4, 9.6, 4.2 Hz, 1H), 2.42 (dq, *J* = 11.7, 9.0 Hz, 1H), 2.25 (dtd, *J* = 11.5, 8.9, 4.2 Hz, 1H), 2.17 – 2.11 (m, 1H), 1.90 (dt, *J* = 11.5, 8.8 Hz, 1H), 1.75 (dt, *J* = 13.3, 7.4 Hz, 1H), 0.86 (t, *J* = 7.4 Hz, 3H); <sup>13</sup>C NMR (150 MHz, CDCl<sub>3</sub>) δ 178.94, 146.04, 131.86, 128.06, 118.93, 110.31, 56.48, 49.85, 32.17, 25.23, 20.96, 9.06.

HRMS (ESI-TOF) *m/z*. Calcd for C<sub>14</sub>H<sub>14</sub>NO<sub>2</sub><sup>-</sup> [M-H]<sup>-</sup> 228.1025, found 228.1023.

The absolute stereochemistry was assigned based on comparing the specific rotation of **5u** with literature.

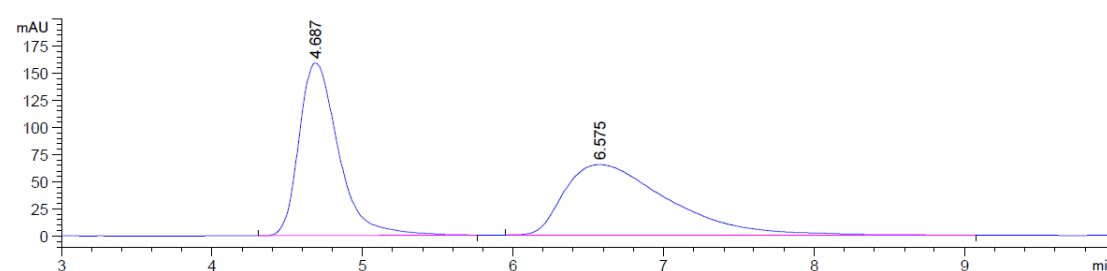

| Peak # | RetTime [min] | Type | Width [min] | Area [mAU*s] | Height [mAU] | Area %  |
|--------|---------------|------|-------------|--------------|--------------|---------|
| 1      | 4.687         | BB   | 0.2816      | 2886.38135   | 159.12334    | 48.1444 |
| 2      | 6.575         | BB   | 0.7145      | 3108.88110   | 64.94115     | 51.8556 |

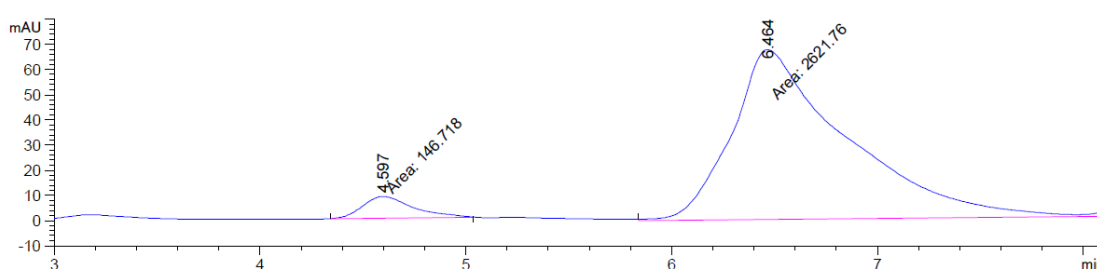

| Peak # | RetTime [min] | Type | Width [min] | Area [mAU*s] | Height [mAU] | Area %  |
|--------|---------------|------|-------------|--------------|--------------|---------|
| 1      | 4.597         | MM   | 0.2843      | 146.71846    | 8.60063      | 5.2996  |
| 2      | 6.464         | MM   | 0.6480      | 2621.76270   | 67.42942     | 94.7004 |

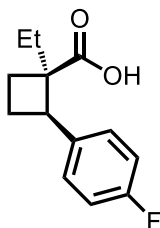

**(1R,2R)-1-ethyl-2-(4-fluorophenyl)cyclobutanecarboxylic acid (5e)**

Substrate **4** was arylated following the general arylation procedure (eluent: hexane/ethyl acetate = 5/1 with 1% v/v of acetic acid). The product was obtained as a pale-yellow oil (62% yield).

The enantiomeric purity of the substrate was determined by SFC analysis (CHIRALPAK® OJ-3 column, 5% *i*PrOH / CO<sub>2</sub>, flow rate 2 mL/min, retention time 2.639 min (minor) and 6.111 min (major), 95:5 er);

<sup>1</sup>H NMR (600 MHz, CDCl<sub>3</sub>) δ 7.11 (ddd, *J* = 6.0, 5.4, 2.7 Hz, 2H), 6.93 (t, *J* = 8.7 Hz, 2H), 3.48 (t, *J* = 9.0 Hz, 1H), 2.52 – 2.46 (m, 1H), 2.43 – 2.35 (m, 1H), 2.20 (dtd, *J* = 11.4, 9.0, 4.0 Hz, 1H), 2.16 – 2.10 (m, 1H), 1.86 – 1.80 (m, 1H), 1.70 (dt, *J* = 13.3, 7.4 Hz, 1H), 0.84 (t, *J* = 7.4 Hz, 3H); <sup>13</sup>C NMR (150 MHz, CDCl<sub>3</sub>) δ 178.73, 161.67 (d, *J* = 243 Hz), 136.07 (d, *J* = 3.0 Hz), 128.74 (d, *J* = 7.5 Hz), 114.85 (d, *J* = 21 Hz), 56.42, 49.54, 32.14, 25.14, 21.52, 9.09; <sup>19</sup>F NMR (376 MHz, CDCl<sub>3</sub>) δ -116.70.

HRMS (ESI-TOF) *m/z*. Calcd for C<sub>13</sub>H<sub>14</sub>FO<sub>2</sub><sup>-</sup> [M-H]<sup>-</sup> 221.0978, found 221.0979.

The absolute stereochemistry was assigned based on comparing the specific rotation of **5u** with literature.

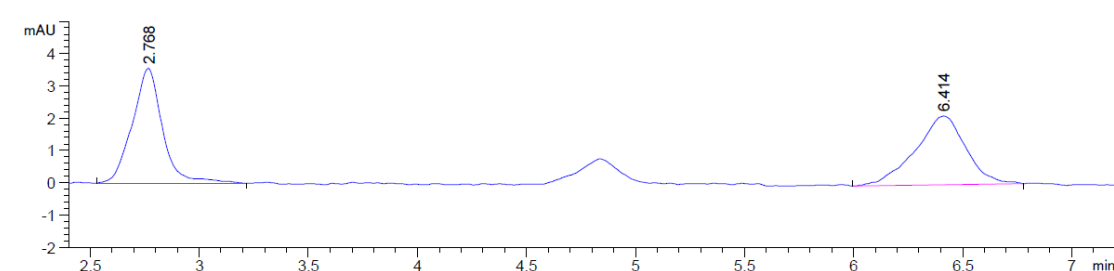

| Peak # | RetTime [min] | Type | Width [min] | Area [mAU*s] | Height [mAU] | Area %  |
|--------|---------------|------|-------------|--------------|--------------|---------|
| 1      | 2.768         | BB   | 0.1382      | 34.19260     | 3.55512      | 50.0155 |
| 2      | 6.414         | BB   | 0.2279      | 34.17139     | 2.12114      | 49.9845 |

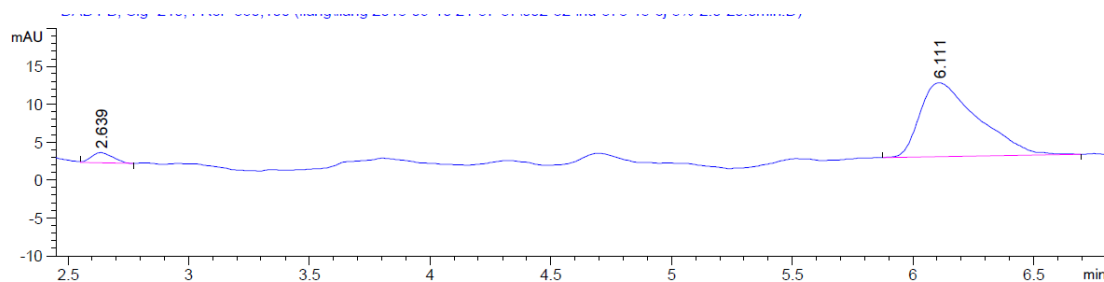

| Peak # | RetTime [min] | Type | Width [min] | Area [mAU*s] | Height [mAU] | Area %  |
|--------|---------------|------|-------------|--------------|--------------|---------|
| 1      | 2.639         | VB   | 0.0920      | 8.37479      | 1.35660      | 4.8913  |
| 2      | 6.111         | BB   | 0.2422      | 162.84474    | 9.78151      | 95.1087 |

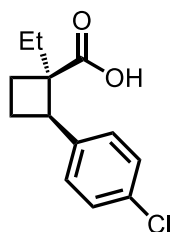

**(1R,2R)-2-(4-chlorophenyl)-1-ethylcyclobutanecarboxylic acid (5f)**

Substrate **4** was arylated following the general arylation procedure (eluent: hexane/ethyl acetate = 5/1 with 1% v/v of acetic acid). The product was obtained as a white solid (63% yield).

The enantiomeric purity of the substrate was determined by SFC analysis (CHIRALPAK® OJ-3 column, 5% *i*PrOH / CO<sub>2</sub>, flow rate 2 mL/min, retention time 3.581 min (minor) and 7.103 min (major), 92:8 er);

<sup>1</sup>H NMR (600 MHz, CDCl<sub>3</sub>) δ 7.22 (d, *J* = 8.5 Hz, 2H), 7.09 (d, *J* = 8.1 Hz, 2H), 3.48 (t, *J* = 9.0 Hz, 1H), 2.53 – 2.47 (m, 1H), 2.44 – 2.34 (m, 1H), 2.23 – 2.17 (m, 1H), 2.15 – 2.10 (m, 1H), 1.85 (dt, *J* = 11.4, 8.9 Hz, 1H), 1.75 – 1.67 (m, 1H), 0.85 (t, *J* = 7.4 Hz, 3H); <sup>13</sup>C NMR (150 MHz, CDCl<sub>3</sub>) δ 178.68, 138.92, 132.33, 128.64, 128.20, 56.38, 49.58, 32.19, 25.22, 21.36, 9.10.

HRMS (ESI-TOF) *m/z*. Calcd for C<sub>13</sub>H<sub>14</sub>ClO<sub>2</sub> [M-H]<sup>-</sup> 237.0682, found 237.0687.

The absolute stereochemistry was assigned based on comparing the specific rotation of **5u** with literature.

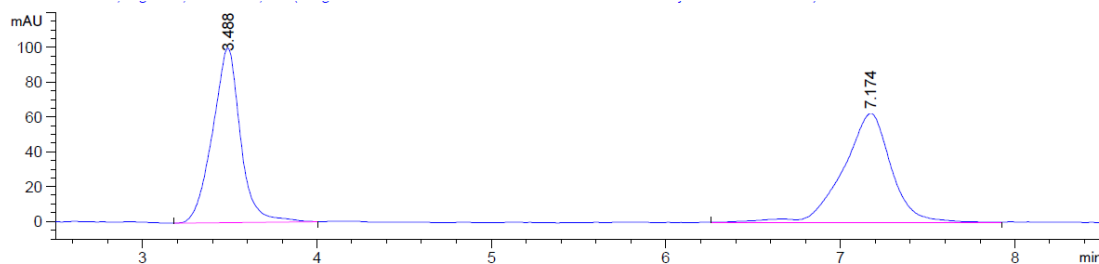

| Peak # | RetTime [min] | Type | Width [min] | Area [mAU*s] | Height [mAU] | Area %  |
|--------|---------------|------|-------------|--------------|--------------|---------|
| 1      | 3.487         | BB   | 0.1609      | 27.71568     | 2.47056      | 50.5590 |
| 2      | 7.174         | BB   | 0.2517      | 27.10285     | 1.53749      | 49.4410 |

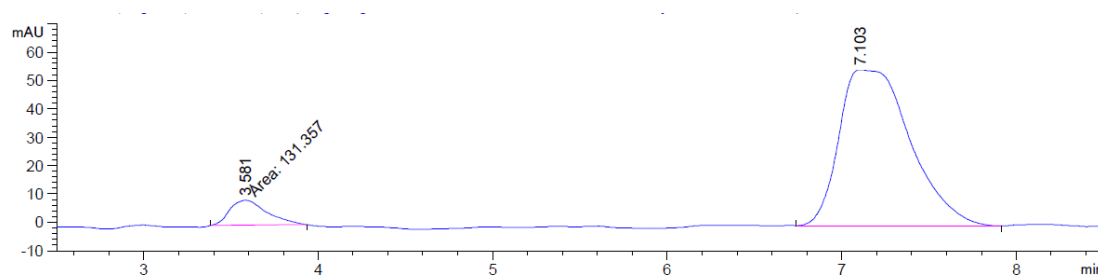

| Peak # | RetTime [min] | Type | Width [min] | Area [mAU*s] | Height [mAU] | Area %  |
|--------|---------------|------|-------------|--------------|--------------|---------|
| 1      | 3.581         | MM   | 0.2478      | 131.35725    | 8.83608      | 7.7650  |
| 2      | 7.103         | BB   | 0.3747      | 1560.30310   | 55.04886     | 92.2350 |

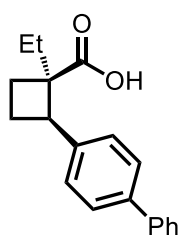

**(1R,2R)-2-([1,1'-biphenyl]-4-yl)-1-ethylcyclobutanecarboxylic acid (5g)**

Substrate **4** was arylated following the general arylation procedure (eluent: hexane/ethyl acetate = 5/1 with 1% v/v of acetic acid). The product was obtained as a white solid (62% yield).

The enantiomeric purity of the substrate was determined by SFC analysis (CHIRALPAK® OD-3 column, 10% *i*PrOH / CO<sub>2</sub>, flow rate 2 mL/min, retention time 5.720 min (major) and 7.662 min (minor), 95:5 er);

<sup>1</sup>H NMR (600 MHz, CDCl<sub>3</sub>) δ 7.56 – 7.54 (m, 2H), 7.48 (d, *J* = 8.3 Hz, 2H), 7.42 – 7.39 (m, 2H), 7.33 – 7.30 (m, 1H), 7.25 (d, *J* = 8.1 Hz, 2H), 3.55 (t, *J* = 8.9 Hz, 1H), 2.56 – 2.45 (m, 2H), 2.24 – 2.16 (m, 2H), 1.88 – 1.83 (m, 1H), 1.76 – 1.72 (m, 1H), 0.84 (t, *J* = 7.4 Hz, 3H);  
<sup>13</sup>C NMR (150 MHz, CDCl<sub>3</sub>) δ 178.01, 140.91, 139.58, 139.38, 128.66, 127.75, 127.05, 126.96, 126.77, 56.46, 50.02, 32.27, 25.33, 21.44, 9.16.

HRMS (ESI-TOF) *m/z* Calcd for C<sub>19</sub>H<sub>19</sub>O<sub>2</sub><sup>-</sup> [M-H]<sup>-</sup> 279.1385, found 279.1388.

The absolute stereochemistry was assigned based on comparing the specific rotation of **5u** with literature.

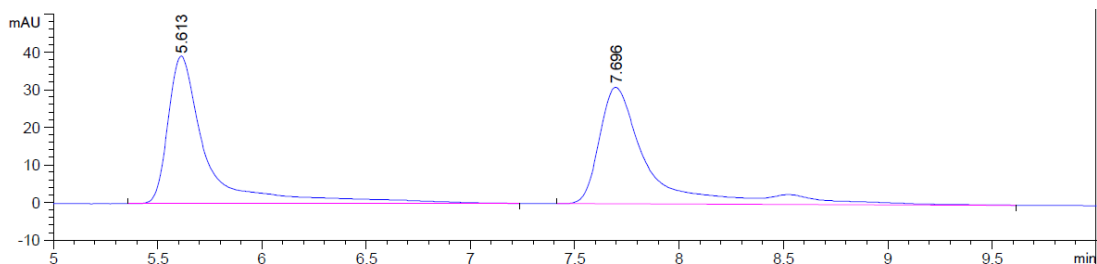

| Peak # | RetTime [min] | Type | Width [min] | Area [mAU*s] | Height [mAU] | Area %  |
|--------|---------------|------|-------------|--------------|--------------|---------|
| 1      | 5.613         | BB   | 0.1876      | 509.75204    | 39.23637     | 49.4105 |
| 2      | 7.696         | BV R | 0.2306      | 521.91632    | 30.98957     | 50.5895 |

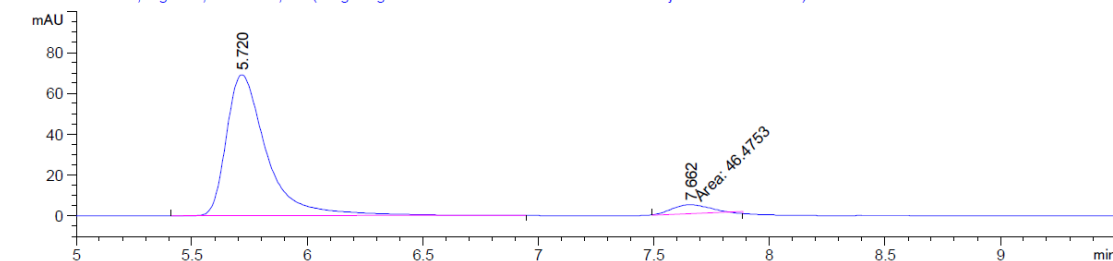

| Peak # | RetTime [min] | Type | Width [min] | Area [mAU*s] | Height [mAU] | Area %  |
|--------|---------------|------|-------------|--------------|--------------|---------|
| 1      | 5.720         | BB   | 0.1814      | 836.39392    | 69.02428     | 94.7359 |
| 2      | 7.662         | MM   | 0.1813      | 46.47529     | 4.27189      | 5.2641  |

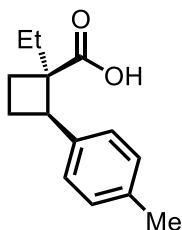

**(1R,2R)-1-ethyl-2-(p-tolyl)cyclobutanecarboxylic acid (5h)**

Substrate **1** was arylated following the general arylation procedure (eluent: hexane/ethyl acetate = 5/1 with 1% v/v of acetic acid). The product was obtained as a white solid (54% yield).

The enantiomeric purity of the substrate was determined by SFC analysis (CHIRALPAK® OJ-3 column, 5% *i*PrOH / CO<sub>2</sub>, flow rate 2 mL/min, retention time 3.734 min (minor) and 7.674 min (major), 92:8 er);

<sup>1</sup>H NMR (600 MHz, CDCl<sub>3</sub>) δ 7.06 (s, 4H), 3.47 (t, *J* = 9.0 Hz, 1H), 2.53 – 2.48 (m, 1H), 2.45 – 2.39 (m, 1H), 2.29 (s, 3H), 2.21 – 2.13 (m, 2H), 1.85 – 1.79 (m, 1H), 1.73 – 1.68 (m, 1H), 0.84 (t, *J* = 7.4 Hz, 3H); <sup>13</sup>C NMR (150 MHz, CDCl<sub>3</sub>) δ 178.49, 137.38, 136.06, 128.80, 127.19, 56.47, 50.12, 32.22, 25.31, 21.55, 21.03, 9.13.



HRMS (ESI-TOF)  $m/z$  Calcd for  $C_{14}H_{17}O_2^-$  [M-H]<sup>-</sup> 217.1229, found 217.1226.

The absolute stereochemistry was assigned based on comparing the specific rotation of **5u** with literature.

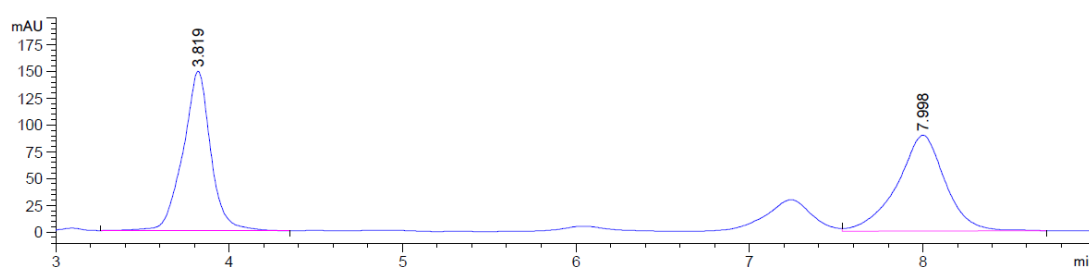

| Peak # | RetTime [min] | Type | Width [min] | Area [mAU*s] | Height [mAU] | Area %  |
|--------|---------------|------|-------------|--------------|--------------|---------|
| 1      | 3.819         | BB   | 0.1596      | 1652.83459   | 148.80081    | 49.0380 |
| 2      | 7.998         | VB   | 0.2784      | 1717.68567   | 89.28466     | 50.9620 |

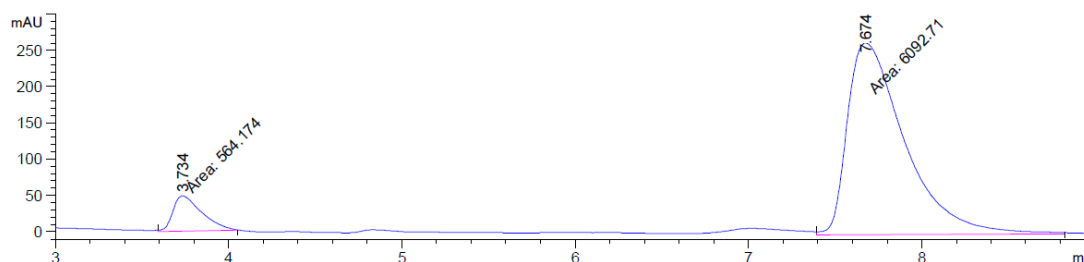

| Peak # | RetTime [min] | Type | Width [min] | Area [mAU*s] | Height [mAU] | Area %  |
|--------|---------------|------|-------------|--------------|--------------|---------|
| 1      | 3.734         | MM   | 0.1929      | 564.17365    | 48.75217     | 8.4750  |
| 2      | 7.674         | MM   | 0.3841      | 6092.70898   | 264.39890    | 91.5250 |

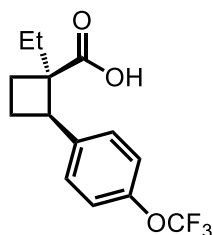

**(1R,2R)-1-ethyl-2-(4-(trifluoromethoxy)phenyl)cyclobutanecarboxylic acid (5i)**

Substrate **1** was arylated following the general arylation procedure (eluent: hexane/ethyl acetate = 5/1 with 1% v/v of acetic acid). The product was obtained as a pale-yellow oil (56% yield).

The enantiomeric purity of the substrate was determined by SFC analysis (CHIRALPAK® OJ-3 column, 4% *i*PrOH / CO<sub>2</sub>, flow rate 1 mL/min, retention time 5.888 min (minor) and 8.670 min (major), 93:7 er);

<sup>1</sup>H NMR (600 MHz, CDCl<sub>3</sub>) δ 7.17 (d, *J* = 8.3 Hz, 2H), 7.09 (d, *J* = 7.8 Hz, 2H), 3.51 (t, *J* =

9.0 Hz, 1H), 2.52 – 2.46 (m, 1H), 2.40 (dtd,  $J = 11.5, 9.5, 8.5$  Hz, 1H), 2.25 – 2.19 (m, 1H), 2.17 – 2.11 (m, 1H), 1.88 – 1.83 (m, 1H), 1.74 – 1.69 (m, 1H), 0.84 (t,  $J = 7.4$  Hz, 3H);  $^{13}\text{C}$  NMR (150 MHz,  $\text{CDCl}_3$ )  $\delta$  178.86, 147.89, 139.15, 128.58, 120.50, 120.47 (q,  $J = 255$  Hz), 56.41, 49.48, 32.15, 25.19, 21.41, 9.01;  $^{19}\text{F}$  NMR (376 MHz,  $\text{CDCl}_3$ )  $\delta$  -58.14.

HRMS (ESI-TOF)  $m/z$ . Calcd for  $\text{C}_{14}\text{H}_{14}\text{F}_3\text{O}_3^-$  [M-H] $^-$  287.0895, found 287.0898.

The absolute stereochemistry was assigned based on comparing the specific rotation of **5u** with literature.

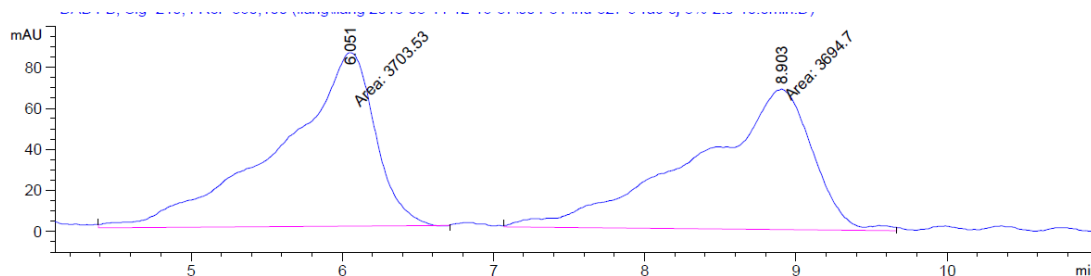

| Peak # | RetTime [min] | Type | Width [min] | Area [mAU*s] | Height [mAU] | Area %  |
|--------|---------------|------|-------------|--------------|--------------|---------|
| 1      | 6.051         | MM   | 0.7287      | 3703.52539   | 84.70240     | 50.0597 |
| 2      | 8.903         | MM   | 0.8979      | 3694.69897   | 68.58344     | 49.9403 |

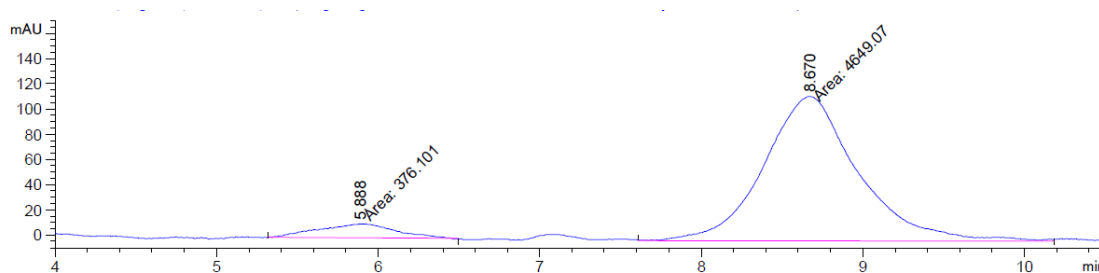

| Peak # | RetTime [min] | Type | Width [min] | Area [mAU*s] | Height [mAU] | Area %  |
|--------|---------------|------|-------------|--------------|--------------|---------|
| 1      | 5.888         | MM   | 0.5542      | 376.10083    | 11.30990     | 7.4843  |
| 2      | 8.670         | MM   | 0.6762      | 4649.07373   | 114.59574    | 92.5157 |

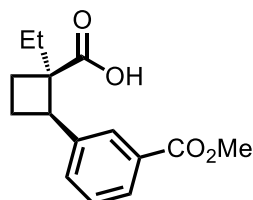

**(1R,2R)-1-ethyl-2-(3-(methoxycarbonyl)phenyl)cyclobutanecarbox (5j)**

Substrate **1** was arylated following the general arylation procedure (eluent: hexane/ethyl acetate = 2/1 with 1% v/v of acetic acid). The product was obtained as a white solid (64% yield).

The enantiomeric purity of the substrate was determined by SFC analysis (CHIRALPAK® AD-3 column, 10% *i*PrOH / CO<sub>2</sub>, flow rate 1 mL/min, retention time 9.159 min (major) and 10.557 min (minor), 89:11 er);

<sup>1</sup>H NMR (600 MHz, CDCl<sub>3</sub>) δ 7.85 (d, *J* = 7.7 Hz, 1H), 7.82 (s, 1H), 7.35 (d, *J* = 7.7 Hz, 1H), 7.29 (t, *J* = 7.7 Hz, 1H), 3.90 (s, 3H), 3.55 (t, *J* = 8.8 Hz, 1H), 2.53 – 2.43 (m, 2H), 2.25 – 2.19 (m, 1H), 2.15 (dt, *J* = 14.5, 7.2 Hz, 1H), 1.89 – 1.84 (m, 1H), 1.75 – 1.70 (m, 1H), 0.83 (t, *J* = 7.4 Hz, 3H); <sup>13</sup>C NMR (150 MHz, CDCl<sub>3</sub>) δ 178.60, 167.17, 140.78, 131.73, 129.87, 128.59, 128.12, 127.92, 56.39, 52.05, 49.86, 32.20, 25.25, 21.23, 9.09.

HRMS (ESI-TOF) *m/z* Calcd for C<sub>15</sub>H<sub>17</sub>O<sub>4</sub> [M-H]<sup>-</sup> 261.1127, found 261.1130.

The absolute stereochemistry was assigned based on comparing the specific rotation of **5u** with literature.

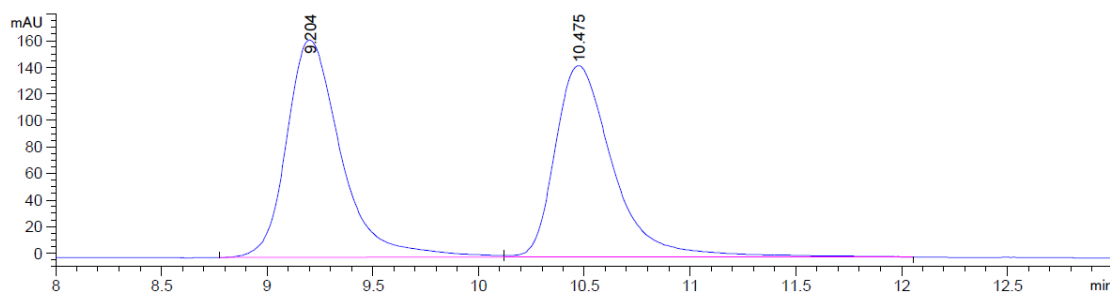

| Peak # | RetTime [min] | Type | Width [min] | Area [mAU*s] | Height [mAU] | Area %  |
|--------|---------------|------|-------------|--------------|--------------|---------|
| 1      | 9.204         | BV   | 0.2686      | 2927.27808   | 163.69240    | 51.5808 |
| 2      | 10.475        | VB   | 0.2883      | 2747.85449   | 144.24396    | 48.4192 |

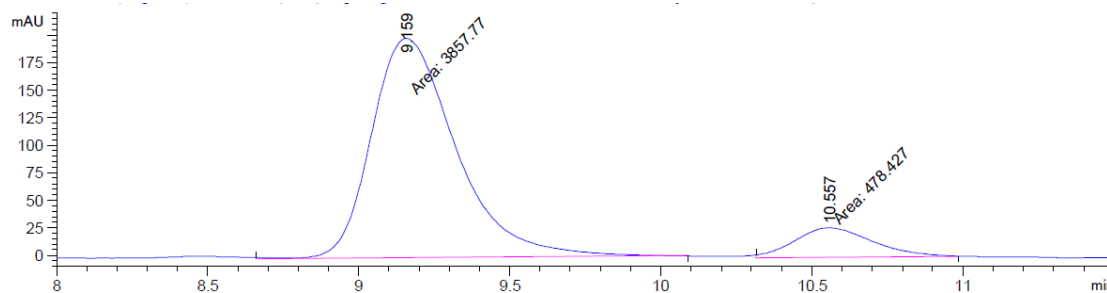

| Peak # | RetTime [min] | Type | Width [min] | Area [mAU*s] | Height [mAU] | Area %  |
|--------|---------------|------|-------------|--------------|--------------|---------|
| 1      | 9.159         | MM   | 0.3229      | 3857.77026   | 199.13843    | 88.9667 |
| 2      | 10.557        | MM   | 0.2999      | 478.42657    | 26.58735     | 11.0333 |

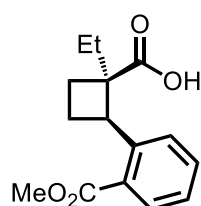

### (1R,2R)-1-ethyl-2-(2-(methoxycarbonyl)phenyl)cyclobutanecarboxylic acid (5k)

Substrate **1** was arylated following the general arylation procedure (eluent: hexane/ethyl acetate = 2/1 with 1% v/v of acetic acid). The product was obtained as a colorless oil (60% yield).

The enantiomeric purity of the substrate was determined by SFC analysis (CHIRALPAK® OJ-3 column, 5% *i*PrOH / CO<sub>2</sub>, flow rate 2 mL/min, retention time 3.181 min (minor) and 4.768 min (major), 92:8 er);

<sup>1</sup>H NMR (600 MHz, CDCl<sub>3</sub>) δ 7.69 (dd, *J* = 7.8, 1.5 Hz, 1H), 7.62 – 7.59 (m, 1H), 7.54 (td, *J* = 7.6, 1.4 Hz, 1H), 7.28 (td, *J* = 7.6, 1.2 Hz, 1H), 3.96 (s, 3H), 3.91 – 3.87 (m, 1H), 2.80 (d, *J* = 12.1 Hz, 1H), 2.42 – 2.38 (m, 1H), 2.25 – 2.20 (m, 2H), 1.97 – 1.92 (m, 2H), 0.92 (t, *J* = 7.4 Hz, 3H); <sup>13</sup>C NMR (150 MHz, CDCl<sub>3</sub>) δ 174.90, 171.37, 141.55, 132.75, 130.48, 129.59, 127.18, 126.72, 55.95, 53.03, 45.81, 31.05, 25.13, 21.05, 9.07.

HRMS (ESI-TOF) *m/z* Calcd for C<sub>15</sub>H<sub>17</sub>O<sub>4</sub><sup>-</sup> [M-H]<sup>-</sup> 261.1127, found 261.1122.

The absolute stereochemistry was assigned based on comparing the specific rotation of **5u** with literature.

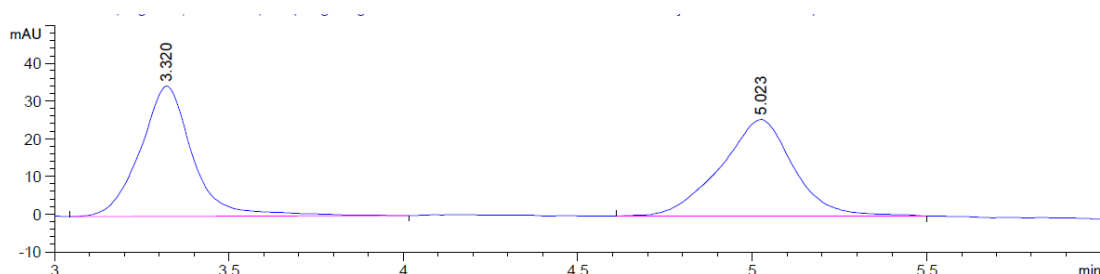

| Peak # | RetTime [min] | Type | Width [min] | Area [mAU*s] | Height [mAU] | Area %  |
|--------|---------------|------|-------------|--------------|--------------|---------|
| 1      | 3.320         | BB   | 0.1505      | 363.30420    | 34.61173     | 49.2798 |
| 2      | 5.023         | BB   | 0.2119      | 373.92389    | 25.67123     | 50.7202 |

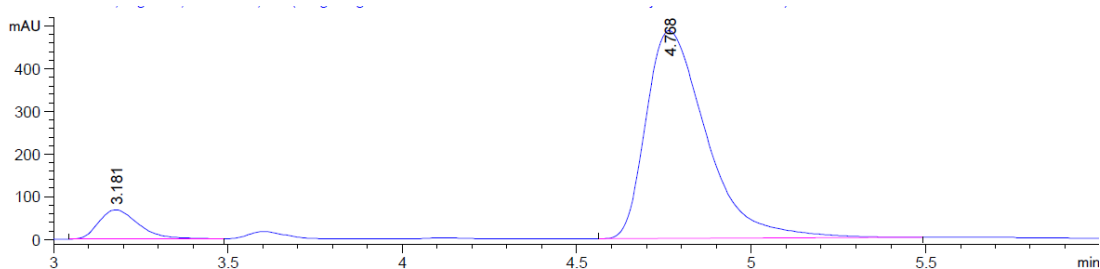

| Peak # | RetTime [min] | Type | Width [min] | Area [mAU*s] | Height [mAU] | Area %  |
|--------|---------------|------|-------------|--------------|--------------|---------|
| 1      | 3.181         | BV   | 0.1234      | 549.15814    | 68.62186     | 8.5895  |
| 2      | 4.768         | BB   | 0.1839      | 5844.23730   | 487.40265    | 91.4105 |

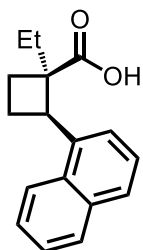

**(1R,2R)-1-ethyl-2-(naphthalen-1-yl)cyclobutanecarboxylic acid (5l)**

Substrate **1** was arylated following the general arylation procedure (eluent: hexane/ethyl acetate = 5/1 with 1% v/v of acetic acid). The product was obtained as a colorless oil (56% yield).

The enantiomeric purity of the substrate was determined by SFC analysis (CHIRALPAK® AD-3 column, 10% <sup>i</sup>PrOH / CO<sub>2</sub>, flow rate 1 mL/min, retention time 14.396 min (major) and 17.263 min (minor), 92:8 er);

<sup>1</sup>H NMR (600 MHz, CDCl<sub>3</sub>) δ 8.08 (d, *J* = 8.4 Hz, 1H), 7.81 (d, *J* = 8.0 Hz, 1H), 7.68 (d, *J* = 8.1 Hz, 1H), 7.50 – 7.43 (m, 2H), 7.41 (d, *J* = 7.1 Hz, 1H), 7.36 (t, *J* = 7.6 Hz, 1H), 4.40 (t, *J* = 9.1 Hz, 1H), 2.76 – 2.67 (m, 1H), 2.57 – 2.51 (m, 1H), 2.37 – 2.32 (m, 1H), 2.20 (dtd, *J* = 11.5, 8.6, 3.1 Hz, 1H), 1.96 – 1.88 (m, 2H), 0.85 (t, *J* = 7.4 Hz, 3H); <sup>13</sup>C NMR (150 MHz, CDCl<sub>3</sub>) δ 178.08, 136.09, 133.64, 132.39, 128.64, 127.25, 125.67, 125.36, 125.28, 123.82, 123.66, 57.96, 45.41, 32.49, 24.95, 20.91, 9.38.

HRMS (ESI-TOF) *m/z* Calcd for C<sub>17</sub>H<sub>17</sub>O<sub>2</sub> [M-H]<sup>-</sup> 253.1229, found 253.1225.

The absolute stereochemistry was assigned based on comparing the specific rotation of **5u** with literature.

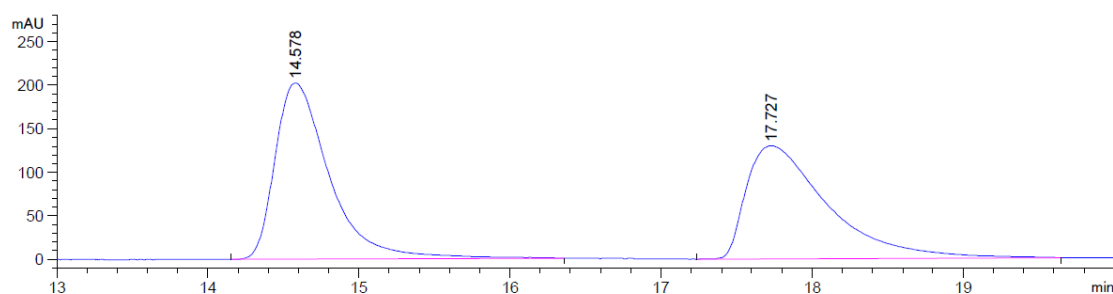

| Peak # | RetTime [min] | Type | Width [min] | Area [mAU*s] | Height [mAU] | Area %  |
|--------|---------------|------|-------------|--------------|--------------|---------|
| 1      | 14.578        | BB   | 0.3782      | 5065.38818   | 202.24588    | 51.1350 |
| 2      | 17.727        | BB   | 0.5496      | 4840.53320   | 129.64720    | 48.8650 |

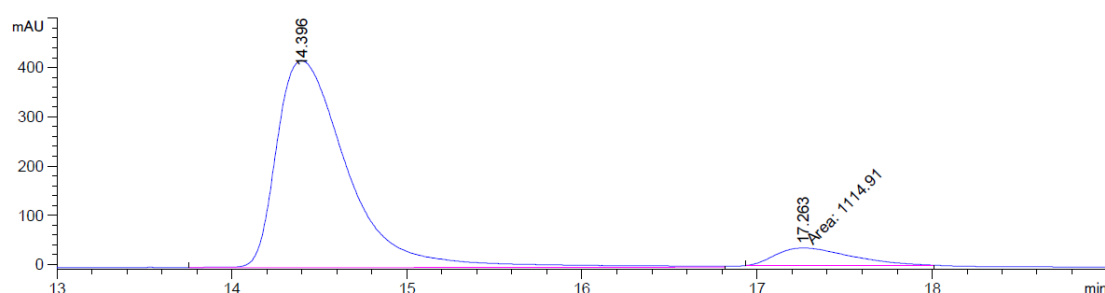

| Peak # | RetTime [min] | Type | Width [min] | Area [mAU*s] | Height [mAU] | Area %  |
|--------|---------------|------|-------------|--------------|--------------|---------|
| 1      | 14.396        | BV   | 0.4351      | 1.18436e4    | 419.91861    | 91.3963 |
| 2      | 17.263        | MM   | 0.5120      | 1114.90845   | 36.29034     | 8.6037  |

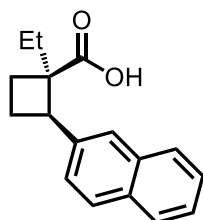

**(1R,2R)-1-ethyl-2-(naphthalen-2-yl)cyclobutanecarboxylic acid (5m)**

Substrate **1** was arylated following the general arylation procedure (eluent: hexane/ethyl acetate = 5/1 with 1% v/v of acetic acid). The product was obtained as a colorless oil (58% yield).

The enantiomeric purity of the substrate was determined by SFC analysis (CHIRALPAK® IC-3 column, 10% *i*PrOH / CO<sub>2</sub>, flow rate 2 mL/min, retention time 3.941 min (major) and 5.166 min (minor), 92:8 er);

<sup>1</sup>H NMR (600 MHz, CDCl<sub>3</sub>) δ 7.78 – 7.74 (m, 2H), 7.66 (d, *J* = 8.5 Hz, 1H), 7.58 (s, 1H), 7.45 – 7.38 (m, 2H), 7.27 (dd, *J* = 8.5, 1.8 Hz, 1H), 3.65 (t, *J* = 8.8 Hz, 1H), 2.59 – 2.48 (m, 2H), 2.25 (ddd, *J* = 10.9, 2.9, 1.4 Hz, 1H), 2.20 – 2.15 (m, 1H), 1.89 – 1.83 (m, 1H), 1.75 (dt, *J* = 13.4, 7.4 Hz, 1H), 0.77 (t, *J* = 7.4 Hz, 3H); <sup>13</sup>C NMR (150 MHz, CDCl<sub>3</sub>) δ 178.20, 138.03, 133.29, 132.39, 127.81, 127.54, 127.51, 126.14, 125.79, 125.52, 125.35, 56.50, 50.38, 32.33, 25.36, 21.35, 9.06.

HRMS (ESI-TOF) *m/z* Calcd for C<sub>17</sub>H<sub>17</sub>O<sub>2</sub><sup>-</sup> [M-H]<sup>-</sup> 253.1229, found 253.1227.

The absolute stereochemistry was assigned based on comparing the specific rotation of **5u** with literature.

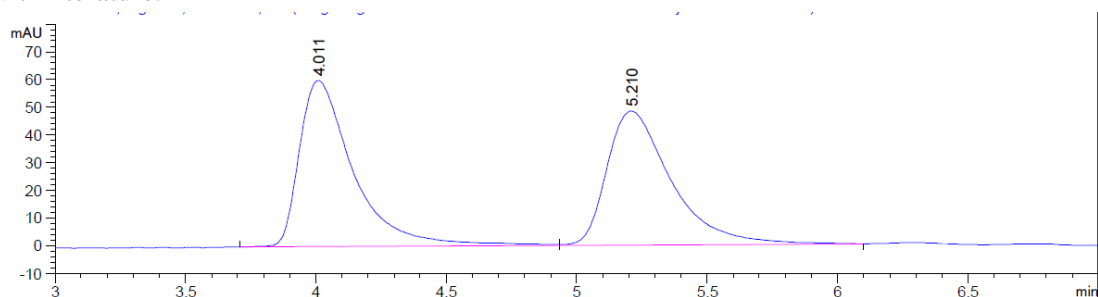

| Peak # | RetTime [min] | Type | Width [min] | Area [mAU*s] | Height [mAU] | Area %  |
|--------|---------------|------|-------------|--------------|--------------|---------|
| 1      | 4.011         | BV   | 0.2155      | 861.07312    | 59.99102     | 50.9482 |
| 2      | 5.210         | VB   | 0.2598      | 829.02124    | 48.40171     | 49.0518 |

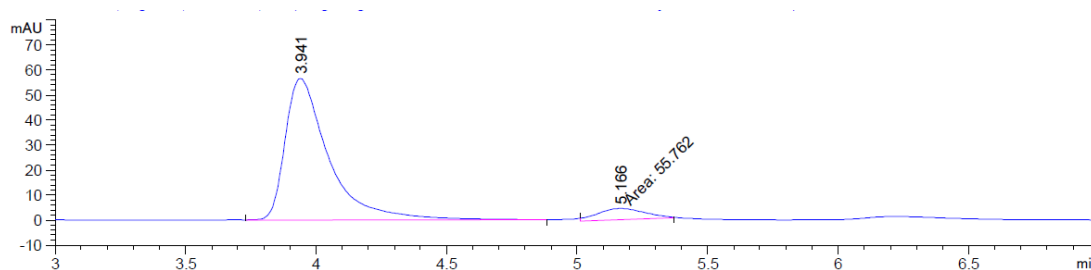

| Peak # | RetTime [min] | Type | Width [min] | Area [mAU*s] | Height [mAU] | Area %  |
|--------|---------------|------|-------------|--------------|--------------|---------|
| 1      | 3.941         | BB   | 0.1709      | 653.11957    | 56.48904     | 92.1338 |
| 2      | 5.166         | MM   | 0.2074      | 55.76199     | 4.48052      | 7.8662  |

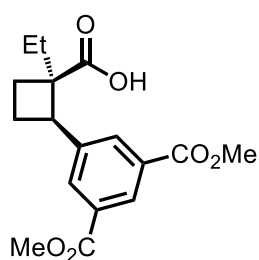

**(1R,2R)-2-(3,5-bis(methoxycarbonyl)phenyl)-1-ethylcyclobutanecarboxylic acid (5n)**

Substrate **1** was arylated following the general arylation procedure (eluent: hexane/ethyl acetate = 2/1 with 1% v/v of acetic acid). The product was obtained as a white solid (60% yield).

The enantiomeric purity of the substrate was determined by SFC analysis (CHIRALPAK® IC-3 column, 10% *i*PrOH / CO<sub>2</sub>, flow rate 2 mL/min, retention time 5.983 min (major) and 7.467 min (minor), 92:8 er);

<sup>1</sup>H NMR (600 MHz, CDCl<sub>3</sub>) δ 8.49 (t, *J* = 1.6 Hz, 1H), 8.02 (dd, *J* = 1.6, 0.6 Hz, 2H), 3.92 (s, 6H), 3.60 (t, *J* = 8.5 Hz, 1H), 2.56 – 2.48 (m, 2H), 2.28 – 2.22 (m, 1H), 2.20 – 2.13 (m, 1H), 1.92 – 1.86 (m, 1H), 1.77 – 1.71 (m, 1H), 0.82 (t, *J* = 7.4 Hz, 3H); <sup>13</sup>C NMR (150 MHz, CDCl<sub>3</sub>) δ 178.03, 166.28, 141.46, 132.71, 130.34, 129.09, 56.43, 52.30, 49.48, 32.17, 25.26, 21.18, 9.01.

HRMS (ESI-TOF) *m/z* Calcd for C<sub>17</sub>H<sub>19</sub>O<sub>6</sub><sup>-</sup> [M-H]<sup>-</sup> 319.1182, found 319.1180.

The absolute stereochemistry was assigned based on comparing the specific rotation of **5u** with literature.

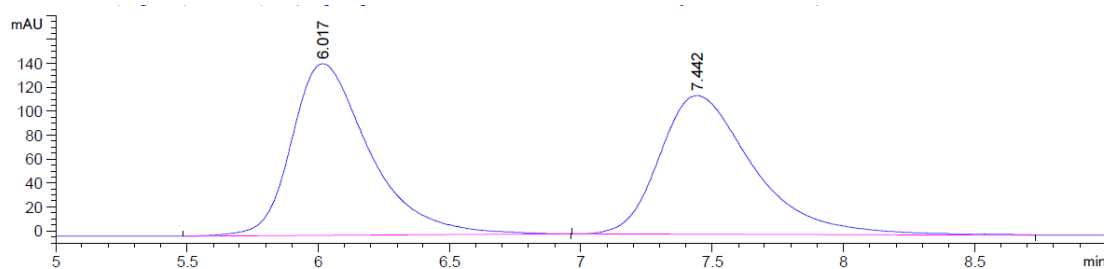

| Peak # | RetTime [min] | Type | Width [min] | Area [mAU*s] | Height [mAU] | Area %  |
|--------|---------------|------|-------------|--------------|--------------|---------|
| 1      | 6.017         | BB   | 0.3138      | 2983.80957   | 143.97331    | 50.7996 |
| 2      | 7.442         | BB   | 0.3782      | 2889.87183   | 116.17687    | 49.2004 |

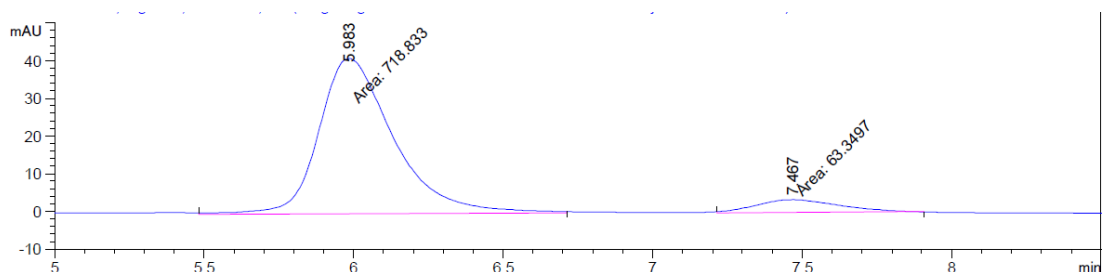

| Peak # | RetTime [min] | Type | Width [min] | Area [mAU*s] | Height [mAU] | Area %  |
|--------|---------------|------|-------------|--------------|--------------|---------|
| 1      | 5.983         | MM   | 0.2907      | 718.83331    | 41.21288     | 91.9009 |
| 2      | 7.467         | MM   | 0.3175      | 63.34967     | 3.32499      | 8.0991  |

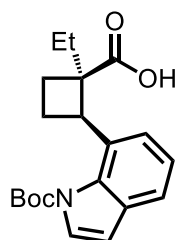

**(1R,2R)-2-(1-(tert-butoxycarbonyl)-1H-indol-7-yl)-1-ethylcyclobutanecarboxylic acid (5o)**

Substrate **1** was arylated following the general arylation procedure (eluent: hexane/ethyl acetate = 2/1 with 1% v/v of acetic acid). The product was obtained as a pale-yellow solid (42% yield).

The enantiomeric purity of the substrate was determined by SFC analysis (CHIRALPAK® OJ-3 column, 5% <sup>i</sup>PrOH / CO<sub>2</sub>, flow rate 2 mL/min, retention time 3.688 min (minor) and 5.836 min (major), 91:9 er);

<sup>1</sup>H NMR (600 MHz, CDCl<sub>3</sub>) δ 7.99 (s, 1H), 7.53 (d, *J* = 3.5 Hz, 1H), 7.36 (dd, *J* = 1.7, 0.8 Hz, 1H), 7.13 (d, *J* = 8.6 Hz, 1H), 6.49 (dd, *J* = 3.7, 0.8 Hz, 1H), 3.61 (t, *J* = 8.6 Hz, 1H), 2.53 – 2.51 (m, 1H), 2.25 – 2.20 (m, 1H), 2.20 – 2.16 (m, 1H), 1.88 – 1.79 (m, 2H), 1.74 – 1.71 (m,



1H), 1.66 (s, 9H), 0.81 (t,  $J = 7.3$  Hz, 3H);  $^{13}\text{C}$  NMR (150 MHz,  $\text{CDCl}_3$ )  $\delta$  182.67, 178.39, 149.78, 134.81, 130.53, 125.89, 124.05, 119.25, 114.65, 107.37, 56.65, 50.40, 32.23, 29.41, 28.18, 25.26, 21.69, 9.11.

HRMS (ESI-TOF)  $m/z$  Calcd for  $\text{C}_{20}\text{H}_{24}\text{NO}_4$   $[\text{M}-\text{H}]^-$  342.1705, found 342.1700.

The absolute stereochemistry was assigned based on comparing the specific rotation of **5u** with literature.

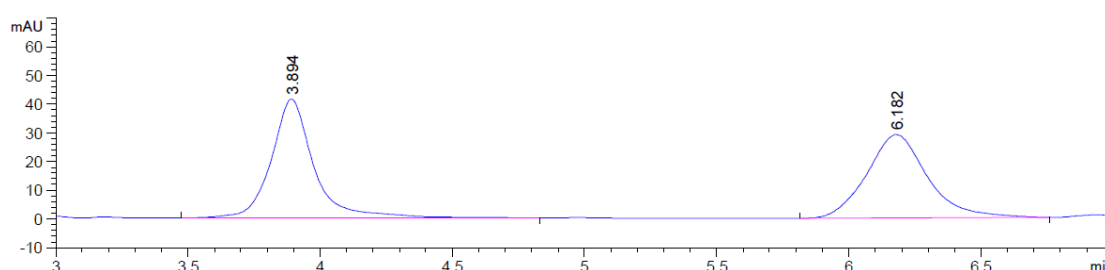

| Peak # | RetTime [min] | Type | Width [min] | Area [mAU*s] | Height [mAU] | Area %  |
|--------|---------------|------|-------------|--------------|--------------|---------|
| 1      | 3.894         | BB   | 0.1610      | 466.13464    | 41.49893     | 50.1091 |
| 2      | 6.182         | BB   | 0.2362      | 464.10437    | 29.07586     | 49.8909 |

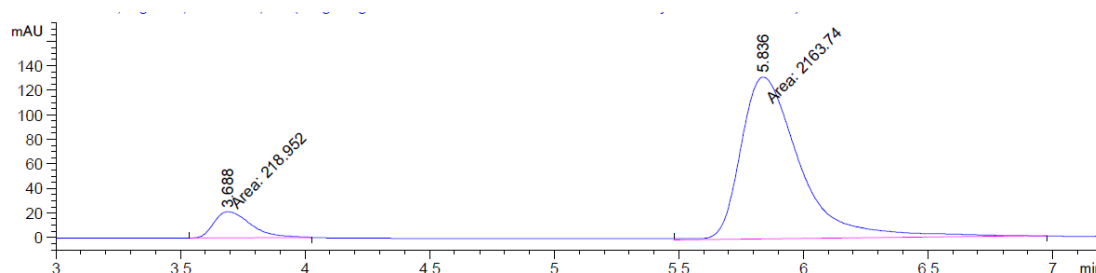

| Peak # | RetTime [min] | Type | Width [min] | Area [mAU*s] | Height [mAU] | Area %  |
|--------|---------------|------|-------------|--------------|--------------|---------|
| 1      | 3.688         | MM   | 0.1705      | 218.95163    | 21.39905     | 9.1893  |
| 2      | 5.836         | MM   | 0.2735      | 2163.74097   | 131.86678    | 90.8107 |

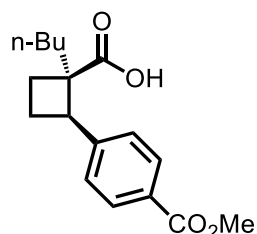

**(1R,2R)-1-butyl-2-(4-(methoxycarbonyl)phenyl)cyclobutanecarboxylic acid (5p)**

Substrate **4p** was arylated following the general arylation procedure (eluent: hexane/ethyl acetate = 2/1 with 1% v/v of acetic acid). The product was obtained as a pale-yellow oil (60% yield).

The enantiomeric purity of the substrate was determined by SFC analysis (CHIRALPAK®)

IC-3 column, 10% <sup>i</sup>PrOH / CO<sub>2</sub>, flow rate 2 mL/min, retention time 5.918 min (major) and 6.620 min (minor), 86:14 er);

<sup>1</sup>H NMR (600 MHz, CDCl<sub>3</sub>) δ 7.95 (d, *J* = 8.4 Hz, 2H), 7.24 (s, 2H), 3.90 (s, 3H), 3.78 – 3.71 (m, 2H), 3.15 – 3.09 (m, 1H), 2.71 – 2.67 (m, 1H), 2.16 – 2.11 (m, 2H), 1.61 (p, *J* = 7.7 Hz, 2H), 1.47 (dt, *J* = 14.6, 7.3 Hz, 2H), 1.26 – 1.24 (m, 1H), 1.00 (t, *J* = 7.3 Hz, 3H); <sup>13</sup>C NMR (150 MHz, CDCl<sub>3</sub>) δ 173.68, 167.01, 145.95, 129.40, 128.25, 126.91, 61.87, 52.02, 43.98, 38.44, 28.13, 27.02, 23.37, 14.04.

HRMS (ESI-TOF) *m/z* Calcd for C<sub>17</sub>H<sub>21</sub>O<sub>4</sub><sup>-</sup> [M-H]<sup>-</sup> 289.1440, found 289.1436.

The absolute stereochemistry was assigned based on comparing the specific rotation of **5u** with literature.

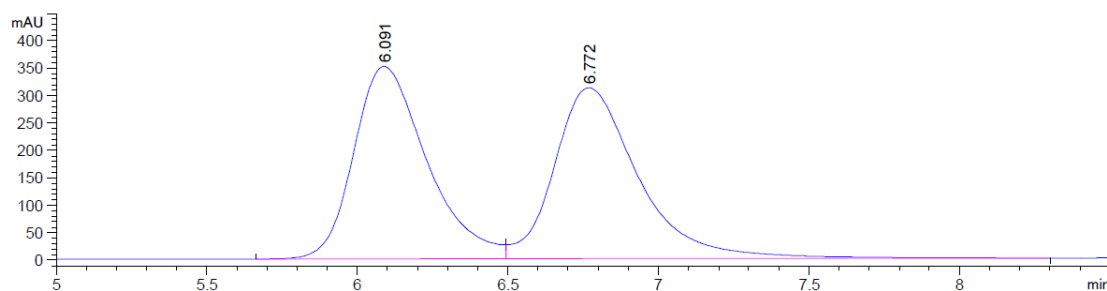

| Peak # | RetTime [min] | Type | Width [min] | Area [mAU*s] | Height [mAU] | Area %  |
|--------|---------------|------|-------------|--------------|--------------|---------|
| 1      | 6.091         | BV   | 0.2566      | 5919.68555   | 351.25800    | 49.4354 |
| 2      | 6.772         | VB   | 0.2928      | 6054.89697   | 311.50253    | 50.5646 |

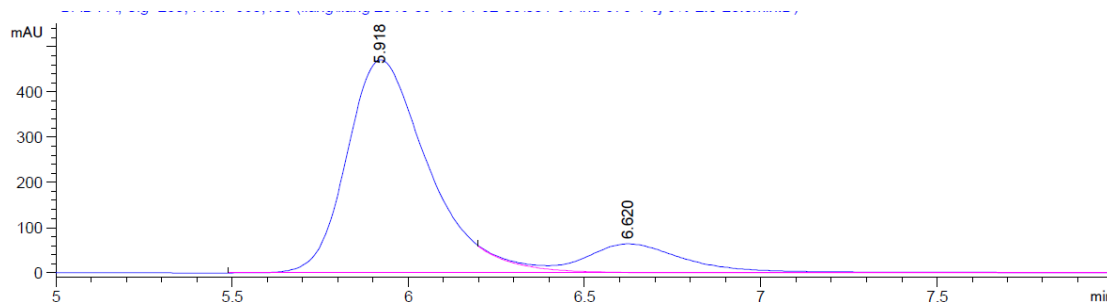

| Peak # | RetTime [min] | Type | Width [min] | Area [mAU*s] | Height [mAU] | Area %  |
|--------|---------------|------|-------------|--------------|--------------|---------|
| 1      | 5.918         | BV R | 0.2421      | 7595.69092   | 471.12335    | 85.4971 |
| 2      | 6.620         | VB E | 0.2998      | 1288.46021   | 63.22224     | 14.5029 |

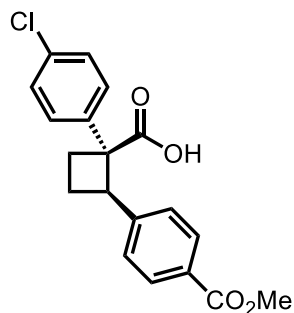

**(1R,2R)-1-(4-chlorophenyl)-2-(4-(methoxycarbonyl)phenyl)cyclobutanecarboxylic acid (5q)**

Substrate **4q** was arylated following the general arylation procedure (eluent: hexane/ethyl acetate = 2/1 with 1% v/v of acetic acid). The product was obtained as a pale-yellow oil (53% yield).

The enantiomeric purity of the substrate was determined by SFC analysis (CHIRALPAK® OJ-3 column, 5% *i*PrOH / CO<sub>2</sub>, flow rate 2 mL/min, retention time 16.200 min (minor) and 19.175 min (major), 94:6 er);

<sup>1</sup>H NMR (600 MHz, CDCl<sub>3</sub>) δ 8.00 (d, *J* = 8.1 Hz, 2H), 7.41 (d, *J* = 8.2 Hz, 2H), 7.33 (d, *J* = 6.6 Hz, 2H), 7.25 (d, *J* = 8.5 Hz, 2H), 4.17 (t, *J* = 9.4 Hz, 1H), 3.92 (s, 3H), 2.99 – 2.93 (m, 1H), 2.69 – 2.63 (m, 1H), 2.38 – 2.30 (m, 2H); <sup>13</sup>C NMR (150 MHz, CDCl<sub>3</sub>) δ 175.96, 166.91, 145.48, 142.42, 132.91, 129.73, 129.07, 128.52, 127.91, 127.74, 58.68, 52.12, 50.13, 28.68, 23.15.

HRMS (ESI-TOF) *m/z* Calcd for C<sub>19</sub>H<sub>16</sub>ClO<sub>4</sub><sup>-</sup> [M-H]<sup>-</sup> 343.0737, found 343.0734.

The absolute stereochemistry was assigned based on comparing the specific rotation of **5u** with literature.

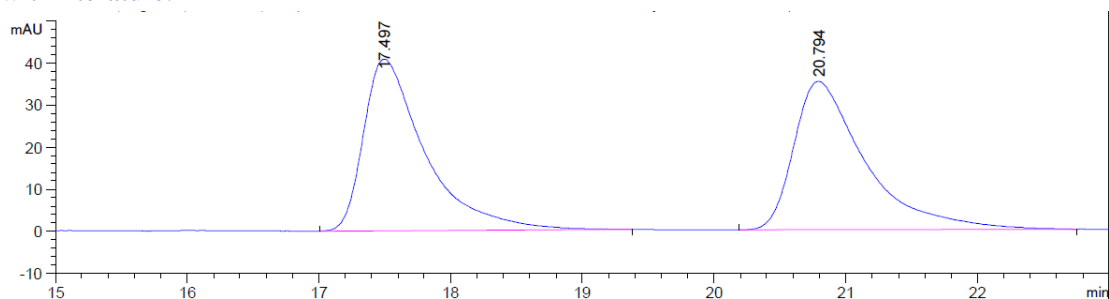

| Peak # | RetTime [min] | Type | Width [min] | Area [mAU*s] | Height [mAU] | Area %  |
|--------|---------------|------|-------------|--------------|--------------|---------|
| 1      | 17.497        | BB   | 0.4760      | 1321.17957   | 40.77972     | 49.8186 |
| 2      | 20.794        | BB   | 0.5283      | 1330.80139   | 35.26552     | 50.1814 |

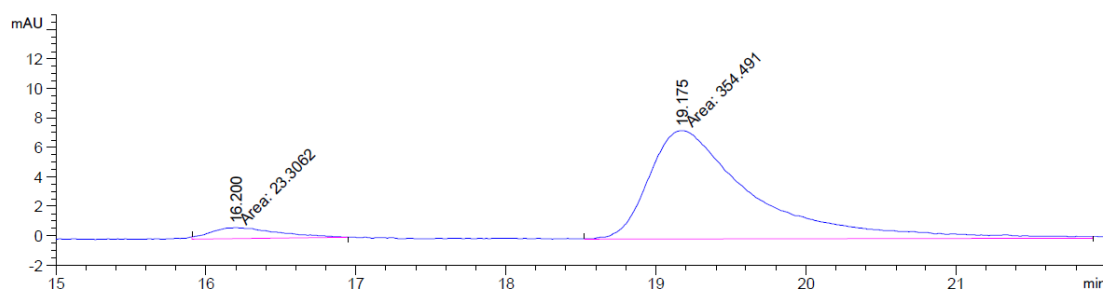

| Peak # | RetTime [min] | Type | Width [min] | Area [mAU*s] | Height [mAU] | Area %  |
|--------|---------------|------|-------------|--------------|--------------|---------|
| 1      | 16.200        | MM   | 0.5180      | 23.30623     | 7.49925e-1   | 6.1690  |
| 2      | 19.175        | MM   | 0.8021      | 354.49060    | 7.36629      | 93.8310 |

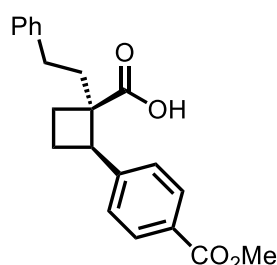

**(1S,2R)-2-(4-(methoxycarbonyl)phenyl)-1-phenethylcyclobutanecarboxylic acid (5r)**

Substrate **4r** was arylated following the general arylation procedure (eluent: hexane/ethyl acetate = 2/1 with 1% v/v of acetic acid). The product was obtained as a pale-yellow oil (65% yield).

The enantiomeric purity of the substrate was determined by SFC analysis (CHIRALPAK® IC-3 column, 10% *i*PrOH / CO<sub>2</sub>, flow rate 2 mL/min, retention time 9.028 min (major) and 11.620 min (minor), 93:7 er);

<sup>1</sup>H NMR (600 MHz, CDCl<sub>3</sub>) δ 7.93 (d, *J* = 8.4 Hz, 2H), 7.29 (t, *J* = 7.6 Hz, 2H), 7.24 – 7.15 (m, 5H), 3.79 (s, 3H), 3.60 (t, *J* = 8.6 Hz, 1H), 2.62 – 2.42 (m, 5H), 2.27 – 2.20 (m, 1H), 2.03 – 1.89 (m, 2H); <sup>13</sup>C NMR (150 MHz, CDCl<sub>3</sub>) δ 178.42, 166.98, 145.32, 141.68, 129.44, 128.56, 128.42, 128.37, 127.32, 125.95, 55.97, 51.92, 50.56, 41.80, 31.41, 26.01, 21.33.

HRMS (ESI-TOF) *m/z* Calcd for C<sub>21</sub>H<sub>21</sub>O<sub>4</sub><sup>-</sup> [M-H]<sup>-</sup> 337.1440, found 337.1438.

The absolute stereochemistry was assigned based on comparing the specific rotation of **5u** with literature.

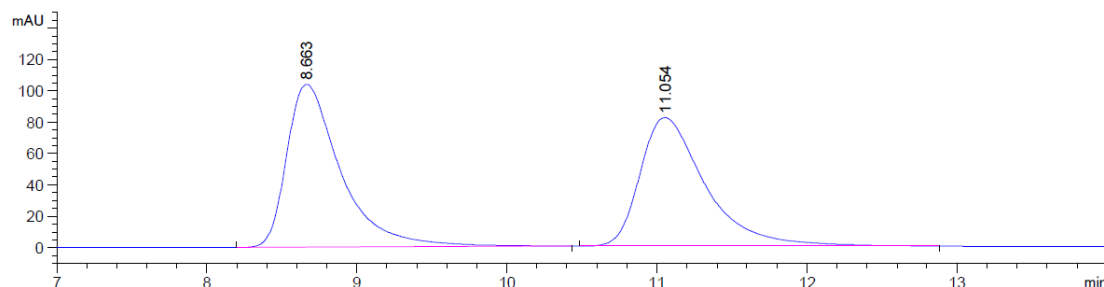

| Peak # | RetTime [min] | Type | Width [min] | Area [mAU*s] | Height [mAU] | Area %  |
|--------|---------------|------|-------------|--------------|--------------|---------|
| 1      | 8.663         | BB   | 0.3714      | 2609.29785   | 103.73867    | 51.2837 |
| 2      | 11.054        | BB   | 0.4535      | 2478.66602   | 81.79804     | 48.7163 |

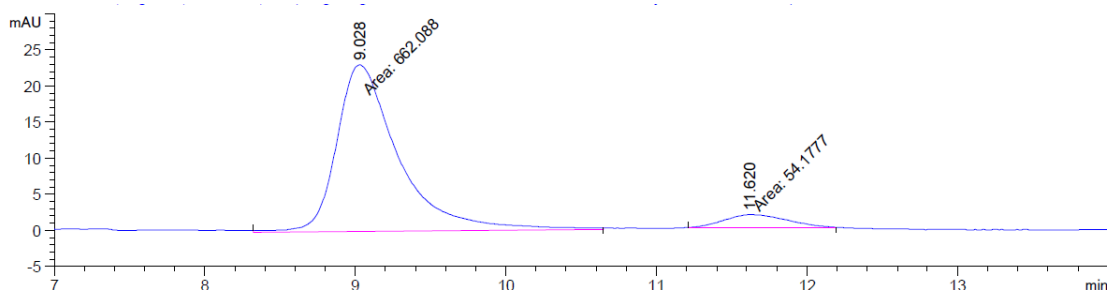

| Peak # | RetTime [min] | Type | Width [min] | Area [mAU*s] | Height [mAU] | Area %  |
|--------|---------------|------|-------------|--------------|--------------|---------|
| 1      | 9.028         | MM   | 0.4777      | 662.08783    | 23.09881     | 92.4361 |
| 2      | 11.620        | MM   | 0.4931      | 54.17773     | 1.83108      | 7.5639  |

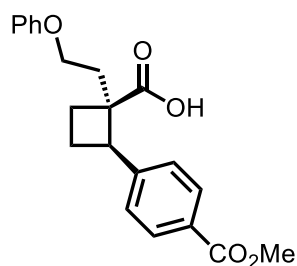

**(1S,2R)-2-(4-(methoxycarbonyl)phenyl)-1-(2-phenoxyethyl)cyclobutanecarboxylic acid (5s)**

Substrate **4s** was arylated following the general arylation procedure (eluent: hexane/ethyl acetate = 2/1 with 1% v/v of acetic acid). The product was obtained as a colorless oil (52% yield).

The enantiomeric purity of the substrate was determined by SFC analysis (CHIRALPAK® IC-3 column, 10% *i*PrOH / CO<sub>2</sub>, flow rate 2 mL/min, retention time 11.010 min (major) and 13.789 min (minor), 84:16 er);

<sup>1</sup>H NMR (600 MHz, CDCl<sub>3</sub>) δ 7.94 (d, *J* = 8.1 Hz, 2H), 7.26 – 7.22 (m, 4H), 6.95 – 6.90 (m, 1H), 6.84 (d, *J* = 7.8 Hz, 2H), 4.03 – 3.94 (m, 2H), 3.87 (s, 3H), 3.73 (t, *J* = 9.0 Hz, 1H), 2.68 – 2.53 (m, 3H), 2.26 (td, *J* = 7.1, 3.2 Hz, 2H), 2.15 – 2.07 (m, 1H); <sup>13</sup>C NMR (150 MHz, CDCl<sub>3</sub>) δ 177.97, 167.02, 158.53, 145.11, 129.48, 129.44, 128.65, 127.31, 120.76, 114.36, 64.31, 52.01, 50.36, 38.15, 26.23, 24.86, 21.76.

HRMS (ESI-TOF) *m/z* Calcd for C<sub>21</sub>H<sub>22</sub>NaO<sub>5</sub><sup>+</sup> [M+Na]<sup>+</sup> 377.1365, found 377.1369.

The absolute stereochemistry was assigned based on comparing the specific rotation of **5u** with literature.

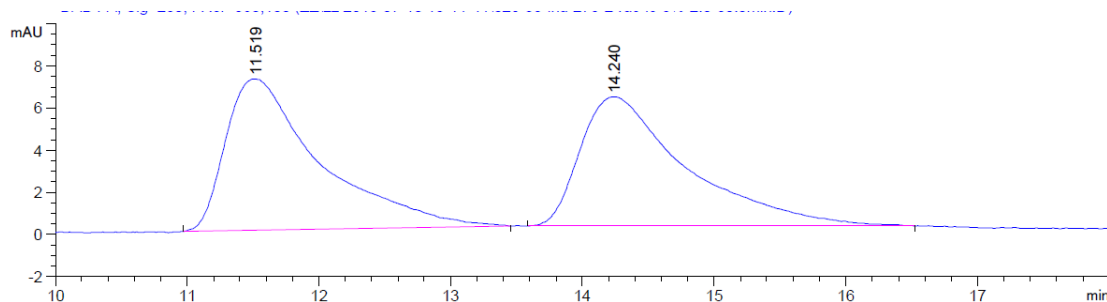

| Peak # | RetTime [min] | Type | Width [min] | Area [mAU*s] | Height [mAU] | Area %  |
|--------|---------------|------|-------------|--------------|--------------|---------|
| 1      | 11.519        | BB   | 0.5852      | 357.24802    | 7.19614      | 51.0097 |
| 2      | 14.240        | BB   | 0.6653      | 343.10483    | 6.14598      | 48.9903 |

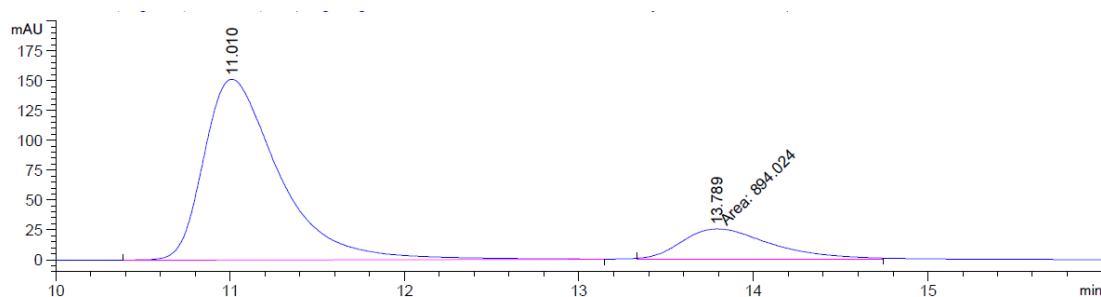

| Peak # | RetTime [min] | Type | Width [min] | Area [mAU*s] | Height [mAU] | Area %  |
|--------|---------------|------|-------------|--------------|--------------|---------|
| 1      | 11.010        | BB   | 0.4352      | 4528.30762   | 151.28094    | 83.5122 |
| 2      | 13.789        | MM   | 0.5916      | 894.02399    | 25.18769     | 16.4878 |

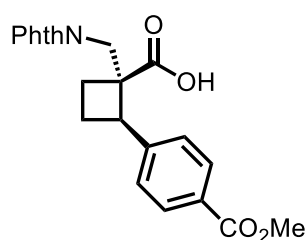

**(1R,2R)-1-((1,3-dioxoisindolin-2-yl)methyl)-2-(4-(methoxycarbonyl)phenyl)cyclobutane carboxylic acid (5t)**

Substrate **4t** was arylated following the general arylation procedure (eluent: hexane/ethyl acetate = 2/1 with 1% v/v of acetic acid). The product was obtained as a white solid (57% yield).

The enantiomeric purity of the substrate was determined by SFC analysis (CHIRALPAK® AS-3 column, 10% *i*PrOH / CO<sub>2</sub>, flow rate 2 mL/min, retention time 6.848 min (minor) and 8.144 min (major), 93:7 er);

<sup>1</sup>H NMR (600 MHz, CDCl<sub>3</sub>) δ 7.97 (d, *J* = 7.1 Hz, 2H), 7.90 (dd, *J* = 5.4, 3.1 Hz, 2H), 7.77 (dd, *J* = 5.5, 3.0 Hz, 2H), 7.44 (d, *J* = 6.5 Hz, 2H), 4.20 (d, *J* = 15.3 Hz, 1H), 4.01 (d, *J* = 12.8

Hz, 1H), 3.89 (s, 3H), 3.81 – 3.76 (m, 1H), 2.61 – 2.55 (m, 1H), 2.41 (t,  $J = 10.2$  Hz, 1H), 2.09 (dd,  $J = 18.4, 9.5$  Hz, 2H);  $^{13}\text{C}$  NMR (150 MHz,  $\text{CDCl}_3$ )  $\delta$  185.59, 168.98, 167.10, 144.93, 134.31, 131.88, 129.52, 128.65, 127.47, 123.59, 123.45, 52.01, 45.70, 29.69, 29.21, 23.79, 21.18.

HRMS (ESI-TOF)  $m/z$  Calcd for  $\text{C}_{22}\text{H}_{18}\text{NO}_6$   $[\text{M}-\text{H}]^-$  392.1134, found 392.1127.

The absolute stereochemistry was assigned based on comparing the specific rotation of **5u** with literature.

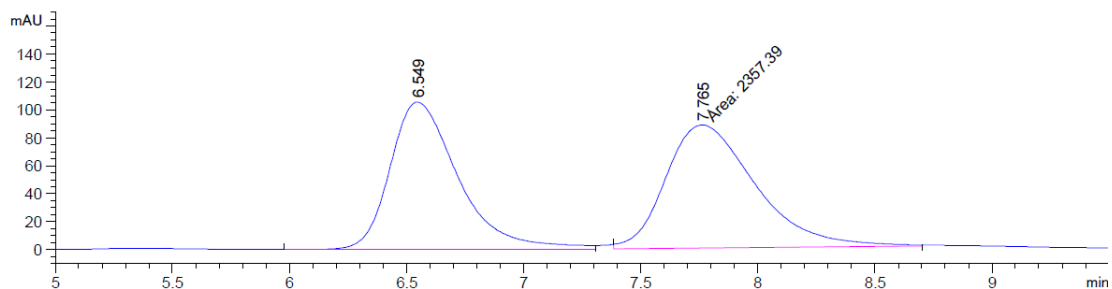

| Peak # | RetTime [min] | Type | Width [min] | Area [mAU*s] | Height [mAU] | Area %  |
|--------|---------------|------|-------------|--------------|--------------|---------|
| 1      | 6.549         | BV   | 0.3108      | 2141.92163   | 105.52997    | 47.6055 |
| 2      | 7.765         | MM   | 0.4455      | 2357.38965   | 88.19743     | 52.3945 |

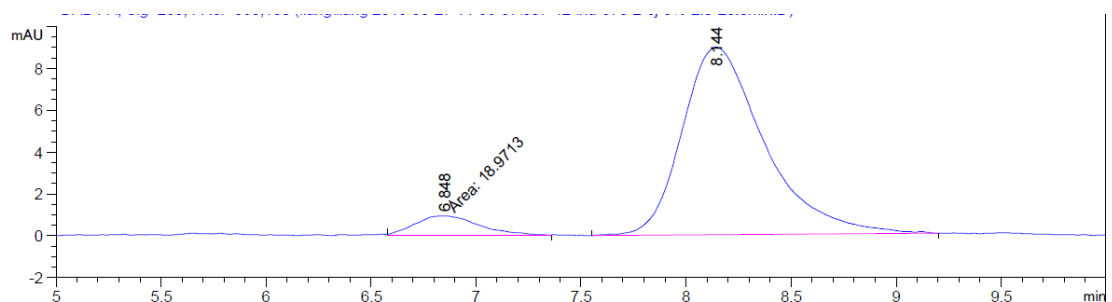

| Peak # | RetTime [min] | Type | Width [min] | Area [mAU*s] | Height [mAU] | Area %  |
|--------|---------------|------|-------------|--------------|--------------|---------|
| 1      | 6.848         | MM   | 0.3437      | 18.97134     | 9.19975e-1   | 7.1862  |
| 2      | 8.144         | BB   | 0.4041      | 245.02602    | 8.98688      | 92.8138 |

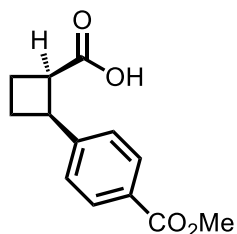

**(1R,2S)-2-(4-(methoxycarbonyl)phenyl)cyclobutanecarboxylic acid (**5u**)**

Substrate **4u** was arylated following the general arylation procedure (eluent: hexane/ethyl acetate = 2/1 with 1% v/v of acetic acid). The product was obtained as a white solid (61% yield).

The enantiomeric purity of the substrate was determined by SFC analysis (CHIRALPAK® AS-3 column, 15% *i*PrOH / CO<sub>2</sub>, flow rate 1 mL/min, retention time 5.554 min (major) and 7.770 min (minor), 92:8 er);

<sup>1</sup>H NMR (600 MHz, CDCl<sub>3</sub>) δ 7.94 (d, *J* = 8.4 Hz, 2H), 7.25 (d, *J* = 8.2 Hz, 2H), 4.04 – 3.98 (m, 1H), 3.90 (s, 3H), 3.54 (q, *J* = 3.2, 2.4 Hz, 1H), 2.65 – 2.57 (m, 1H), 2.36 – 2.28 (m, 2H), 2.28 – 2.21 (m, 1H); <sup>13</sup>C NMR (151 MHz, CDCl<sub>3</sub>) δ 177.78, 167.09, 146.06, 129.50, 128.36, 127.13, 52.00, 44.56, 42.27, 24.44, 20.53.

HRMS (ESI-TOF) *m/z* Calcd for C<sub>13</sub>H<sub>13</sub>O<sub>4</sub><sup>-</sup> [M-H]<sup>-</sup> 233.0814, found 233.0806.

The absolute stereochemistry was assigned based on comparing the specific rotation of **5u** with literature.

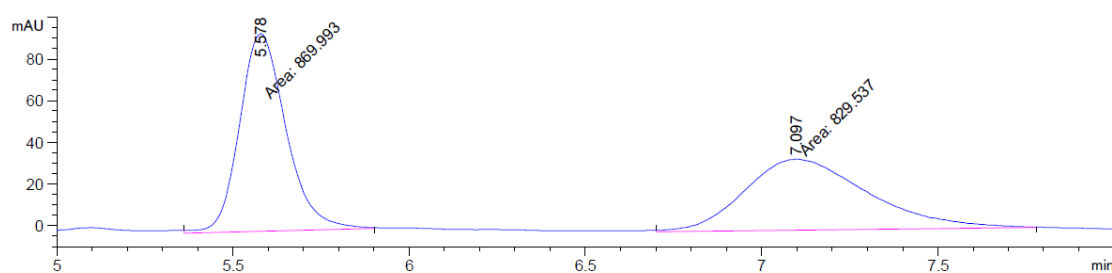

| Peak # | RetTime [min] | Type | Width [min] | Area [mAU*s] | Height [mAU] | Area %  |
|--------|---------------|------|-------------|--------------|--------------|---------|
| 1      | 5.578         | MM   | 0.1528      | 869.99335    | 94.89941     | 51.1902 |
| 2      | 7.097         | MM   | 0.4055      | 829.53741    | 34.09639     | 48.8098 |

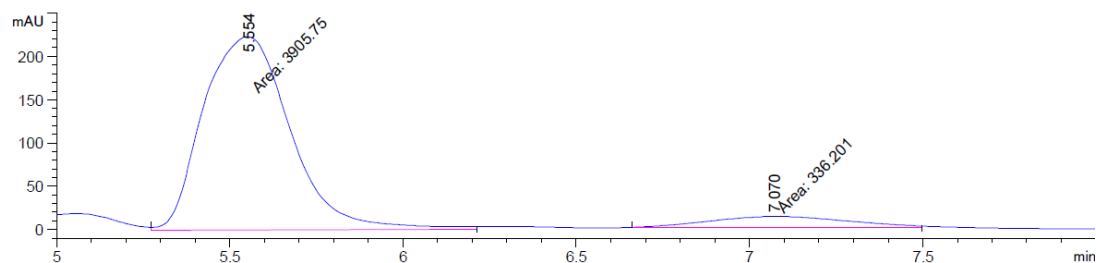

| Peak # | RetTime [min] | Type | Width [min] | Area [mAU*s] | Height [mAU] | Area %  |
|--------|---------------|------|-------------|--------------|--------------|---------|
| 1      | 5.554         | MM   | 0.2910      | 3905.75220   | 223.69759    | 92.0744 |
| 2      | 7.070         | MM   | 0.4548      | 336.20142    | 12.32098     | 7.9256  |

### 3.7 Enantioselective Vinylation of Cyclopropanecarboxylic acid and Cyclobutanecarboxylic acid



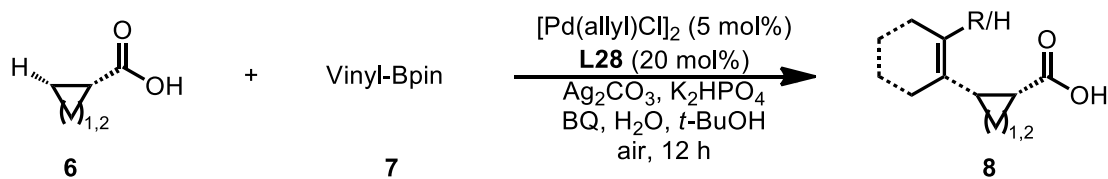

**General procedure for enantioselective Vinylation of cyclopropanecarboxylic acid and cyclobutanecarboxylic acid:** A 2-dram vial equipped with a magnetic stir bar was charged with  $[\text{Pd}(\text{allyl})\text{Cl}]_2$  (1.9mg, 5 mol%) and **L28** (11.7 mg, 20 mol%) in *t*-BuOH (1.0 ml) and then stirred at the rate of 300 rpm at room temperature for 5 min. The appropriate acid substrate (0.10 mmol),  $\text{Ag}_2\text{CO}_3$  (41.4 mg, 0.15 mmol),  $\text{K}_2\text{HPO}_4$  (26.0 mg, 0.15 mmol), Vinyl-Bpin (0.2 mmol), BQ (5.4 mg, 0.05 mmol),  $\text{H}_2\text{O}$  (3.6 mg, 0.2 mmol) was then added. Subsequently the vial was capped and closed tightly. The reaction mixture was then stirred at the rate of 300 rpm at 80 °C for 12 h. After being allowed to cool to room temperature, the mixture was diluted with ethyl acetate and 0.1 ml of acetic acid was then added. The mixture was passed through a pad of Celite with ethyl acetate as the eluent to remove any insoluble precipitate. The resulting solution was concentrated, and the residual mixture was dissolved with a minimal amount of acetone and loaded onto a preparative TLC plate. The pure product was then isolated using preparative TLC with ethyl acetate and hexane (1/4 to 1/1) as the eluent and 1% v/v of acetic acid as additive.

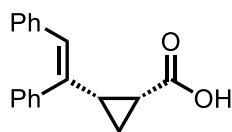

**(1R,2S)-2-((Z)-1,2-diphenylvinyl)cyclopropanecarboxylic acid (8a)**

Substrate **6a** was vinylated following the general vinylation procedure (eluent: hexane/ethyl acetate = 5/1 with 1% v/v of acetic acid). The product was obtained as a colorless oil (71% yield).

The enantiomeric purity of the substrate was determined by SFC analysis (CHIRALPAK® IC-3 column, 10% *i*PrOH /  $\text{CO}_2$ , flow rate 2 mL/min, retention time 4.352 min (minor) and 5.836 min (major), 98:2 er);

$^1\text{H}$  NMR (600 MHz,  $\text{CDCl}_3$ )  $\delta$  7.18 – 7.11 (m, 5H), 7.07 (dt,  $J = 4.9, 1.8$  Hz, 3H), 6.96 – 6.90 (m, 2H), 6.55 (s, 1H), 2.38 (q,  $J = 8.8, 8.1$  Hz, 1H), 2.05 – 2.00 (m, 1H), 1.70 (dt,  $J = 7.9, 5.3$  Hz, 1H), 1.31 (td,  $J = 8.0, 5.1$  Hz, 1H);  $^{13}\text{C}$  NMR (150 MHz,  $\text{CDCl}_3$ )  $\delta$  176.52, 140.97, 136.93, 135.51, 129.77, 129.28, 128.61, 128.41, 127.83, 127.05, 126.49, 30.91, 21.45, 12.34.

HRMS (ESI-TOF)  $m/z$ . Calcd for  $\text{C}_{18}\text{H}_{15}\text{O}_2^-$  [M-H] $^-$  263.1072, found 263.1068.

The absolute stereochemistry was assigned based on comparing the specific rotation of **3m** with literature.

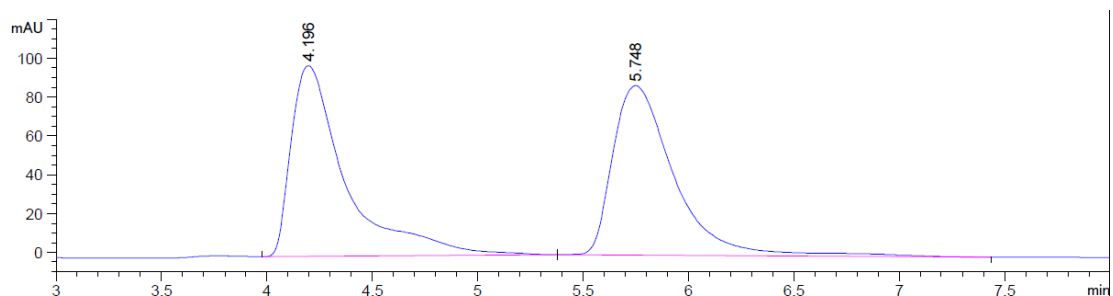

| Peak # | RetTime [min] | Type | Width [min] | Area [mAU*s] | Height [mAU] | Area %  |
|--------|---------------|------|-------------|--------------|--------------|---------|
| 1      | 4.196         | BB   | 0.2682      | 1770.29736   | 98.25798     | 49.8954 |
| 2      | 5.748         | BB   | 0.3115      | 1777.71936   | 87.32085     | 50.1046 |

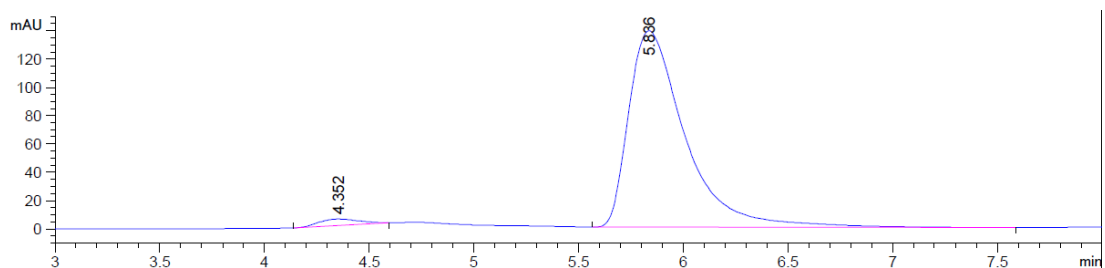

| Peak # | RetTime [min] | Type | Width [min] | Area [mAU*s] | Height [mAU] | Area %  |
|--------|---------------|------|-------------|--------------|--------------|---------|
| 1      | 4.352         | BB   | 0.2122      | 60.82872     | 4.54320      | 2.2811  |
| 2      | 5.836         | BB   | 0.2808      | 2605.83105   | 138.94025    | 97.7189 |

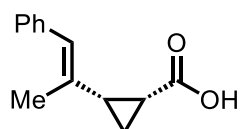

**(1R,2S)-2-((E)-1-phenylprop-1-en-2-yl)cyclopropanecarboxylic acid (8b)**

Substrate **6b** was vinyated following the general vinylation procedure (eluent: hexane/ethyl acetate = 5/1 with 1% v/v of acetic acid). The product was obtained as a white solid (70% yield).

The enantiomeric purity of the substrate was determined by SFC analysis (CHIRALPAK® OJ-3 column, 5% <sup>i</sup>PrOH / CO<sub>2</sub>, flow rate 2 mL/min, retention time 11.153 min (major) and 18.721 min (minor), 97:3 er);

<sup>1</sup>H NMR (600 MHz, CDCl<sub>3</sub>) δ 7.28 (dd, *J* = 8.2, 7.1 Hz, 2H), 7.21 – 7.16 (m, 3H), 6.43 (s, 1H), 2.19 – 2.14 (m, 1H), 1.96 – 1.91 (m, 1H), 1.86 (s, 3H), 1.58 (dt, *J* = 7.7, 5.2 Hz, 1H), 1.23 (td, *J* = 8.0, 5.0 Hz, 1H); <sup>13</sup>C NMR (150 MHz, CDCl<sub>3</sub>) δ 176.64, 137.87, 132.66, 128.85, 128.57, 128.00, 126.20, 30.85, 19.86, 18.65, 12.48.

HRMS (ESI-TOF) *m/z* Calcd for C<sub>13</sub>H<sub>13</sub>O<sub>2</sub><sup>-</sup> [M-H]<sup>-</sup> 201.0916, found 201.0915.

The absolute stereochemistry was assigned based on comparing the specific rotation of **3m**

with literature.

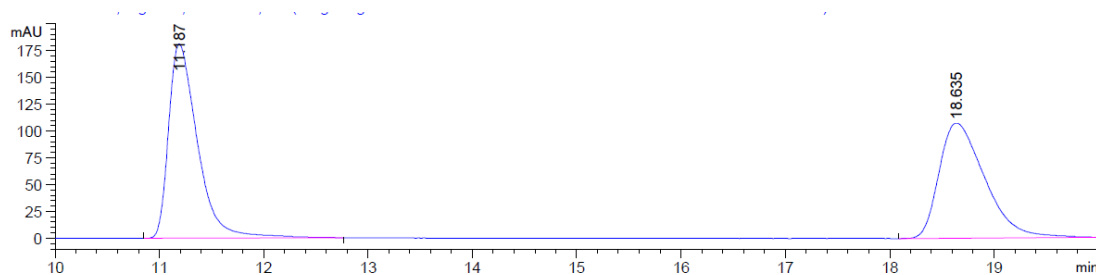

| Peak # | RetTime [min] | Type | Width [min] | Area [mAU*s] | Height [mAU] | Area %  |
|--------|---------------|------|-------------|--------------|--------------|---------|
| 1      | 11.187        | BB   | 0.2919      | 3079.80225   | 164.88766    | 51.0895 |
| 2      | 18.633        | BB   | 0.4418      | 2948.44263   | 97.77589     | 48.9105 |

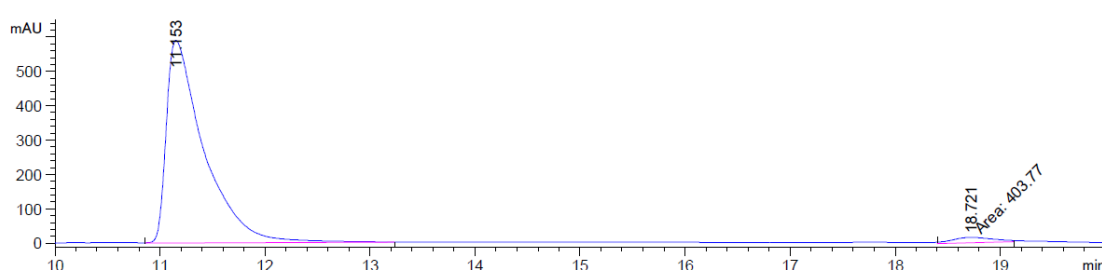

| Peak # | RetTime [min] | Type | Width [min] | Area [mAU*s] | Height [mAU] | Area %  |
|--------|---------------|------|-------------|--------------|--------------|---------|
| 1      | 11.153        | BB   | 0.3567      | 1.45963e4    | 589.75201    | 97.3082 |
| 2      | 18.721        | MM   | 0.4417      | 403.76981    | 15.23415     | 2.6918  |

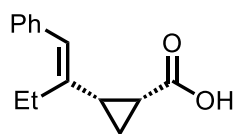

### (1R,2S)-2-((E)-1-phenylbut-1-en-2-yl)cyclopropanecarboxylic acid (**8c**)

Substrate **6c** was vinyolated following the general vinylation procedure (eluent: hexane/ethyl acetate = 5/1 with 1% v/v of acetic acid). The product was obtained as a colorless oil (63% yield).

The enantiomeric purity of the substrate was determined by SFC analysis (CHIRALPAK® OJ-3 column, 5% *i*PrOH / CO<sub>2</sub>, flow rate 2 mL/min, retention time 7.637 min (major) and 10.295 min (minor), 94:6 er);

<sup>1</sup>H NMR (600 MHz, CDCl<sub>3</sub>) δ 7.30 – 7.26 (m, 2H), 7.20 – 7.17 (m, 1H), 7.17 – 7.14 (m, 2H), 6.39 (s, 1H), 2.32 (dq, *J* = 15.0, 7.6 Hz, 1H), 2.21 – 2.15 (m, 2H), 1.97 (ddd, *J* = 9.3, 7.7, 5.4 Hz, 1H), 1.57 (dt, *J* = 7.8, 5.2 Hz, 1H), 1.26 – 1.21 (m, 1H), 1.08 (t, *J* = 7.6 Hz, 3H); <sup>13</sup>C NMR (150 MHz, CDCl<sub>3</sub>) δ 177.08, 137.91, 137.59, 128.67, 128.13, 128.02, 126.21, 28.23, 25.18, 20.59, 12.79, 11.73.

HRMS (ESI-TOF)  $m/z$  Calcd for  $C_{14}H_{15}O_2^-$  [M-H]<sup>-</sup> 215.1072, found 215.1070.

The absolute stereochemistry was assigned based on comparing the specific rotation of **3m** with literature.

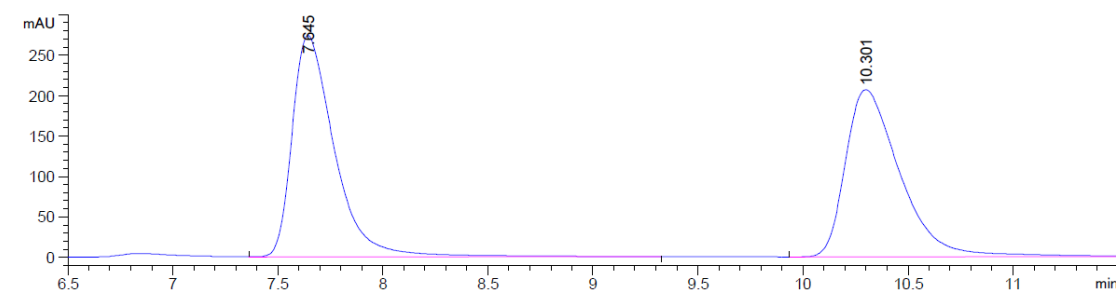

| Peak # | RetTime [min] | Type | Width [min] | Area [mAU*s] | Height [mAU] | Area %  |
|--------|---------------|------|-------------|--------------|--------------|---------|
| 1      | 7.645         | VB   | 0.2135      | 3834.92285   | 273.60776    | 50.5871 |
| 2      | 10.301        | BB   | 0.2754      | 3745.91309   | 206.68524    | 49.4129 |

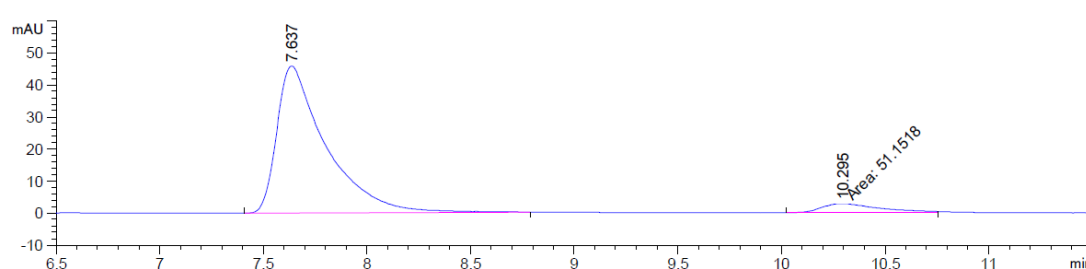

| Peak # | RetTime [min] | Type | Width [min] | Area [mAU*s] | Height [mAU] | Area %  |
|--------|---------------|------|-------------|--------------|--------------|---------|
| 1      | 7.637         | BB   | 0.2301      | 756.30072    | 45.92109     | 93.6650 |
| 2      | 10.295        | MM   | 0.3111      | 51.15176     | 2.74055      | 6.3350  |

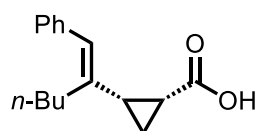

#### (1R,2S)-2-((E)-1-phenylhex-1-en-2-yl)cyclopropanecarboxylic acid (**8d**)

Substrate **6d** was vinyolated following the general vinylation procedure (eluent: hexane/ethyl acetate = 5/1 with 1% v/v of acetic acid). The product was obtained as a colorless oil (61% yield).

The enantiomeric purity of the substrate was determined by SFC analysis (CHIRALPAK® OD-3 column, 5% *i*PrOH / CO<sub>2</sub>, flow rate 1 mL/min, retention time 15.860 min (minor) and 18.022 min (major), 92:8 er);

<sup>1</sup>H NMR (600 MHz, CDCl<sub>3</sub>) δ 7.29 – 7.26 (m, 2H), 7.21 – 7.12 (m, 3H), 6.41 (s, 1H), 2.32 (ddd, *J* = 13.9, 10.2, 6.4 Hz, 1H), 2.20 – 2.09 (m, 2H), 1.96 (ddd, *J* = 9.3, 7.7, 5.4 Hz, 1H), 1.60 – 1.54 (m, 1H), 1.51 – 1.47 (m, 1H), 1.33 – 1.20 (m, 4H), 0.85 (t, *J* = 7.4 Hz, 3H); <sup>13</sup>C

NMR (150 MHz, CDCl<sub>3</sub>)  $\delta$  176.78, 137.97, 136.60, 128.69, 128.56, 128.00, 126.17, 31.83, 30.28, 28.58, 22.78, 20.49, 13.88, 12.05.

HRMS (ESI-TOF)  $m/z$  Calcd for C<sub>16</sub>H<sub>19</sub>O<sub>2</sub><sup>-</sup> [M-H]<sup>-</sup> 243.1385, found 243.1384.

The absolute stereochemistry was assigned based on comparing the specific rotation of **3m** with literature.

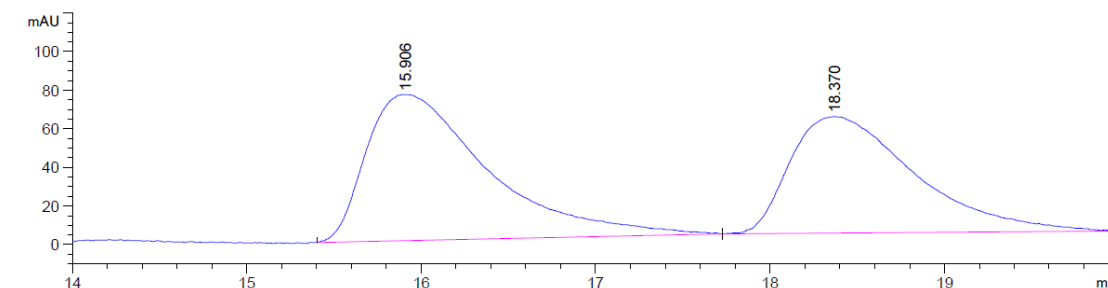

| Peak # | RetTime [min] | Type | Width [min] | Area [mAU*s] | Height [mAU] | Area %  |
|--------|---------------|------|-------------|--------------|--------------|---------|
| 1      | 15.875        | VV R | 0.5591      | 3928.37988   | 82.86909     | 53.1674 |
| 2      | 18.365        | MM   | 0.8272      | 3460.32300   | 69.71623     | 46.8326 |

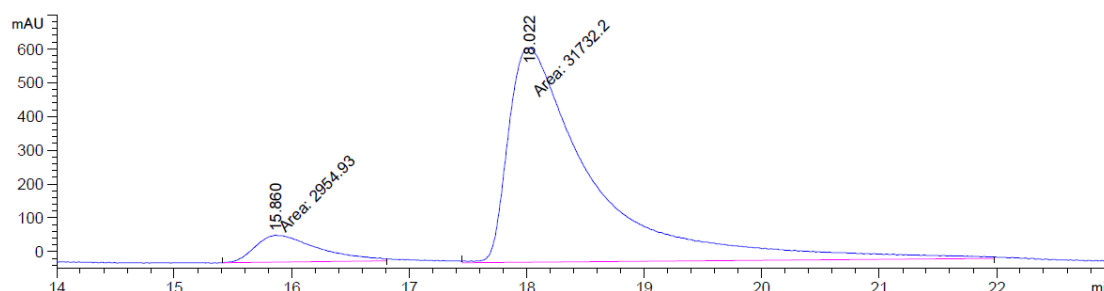

| Peak # | RetTime [min] | Type | Width [min] | Area [mAU*s] | Height [mAU] | Area %  |
|--------|---------------|------|-------------|--------------|--------------|---------|
| 1      | 15.860        | MM   | 0.6183      | 2954.92944   | 79.65041     | 8.5188  |
| 2      | 18.022        | MM   | 0.8315      | 3.17322e4    | 636.05505    | 91.4812 |

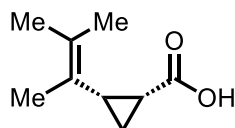

**(1R,2S)-2-(3-methylbut-2-en-2-yl)cyclopropanecarboxylic acid (8e)**

Substrate **6e** was vinyated following the general vinylation procedure (eluent: hexane/ethyl acetate = 5/1 with 1% v/v of acetic acid). The product was obtained as a colorless oil (50% yield).

The enantiomeric purity of the substrate was determined by SFC analysis (CHIRALPAK® IG-3 column, 5% MeOH/CO<sub>2</sub>, flow rate 4 mL/min, retention time 1.834 min (minor) and 2.081 min (major), 95:5 er);

<sup>1</sup>H NMR (600 MHz, CDCl<sub>3</sub>)  $\delta$  2.05 (t,  $J$  = 8.9 Hz, 1H), 1.92 (ddd,  $J$  = 8.9, 7.8, 5.3 Hz, 1H),

1.74 (s, 3H), 1.66 (s, 3H), 1.64 (s, 3H), 1.36 (dt,  $J = 8.0, 5.1$  Hz, 1H), 1.22 – 1.18 (m, 1H);  $^{13}\text{C}$  NMR (150 MHz,  $\text{CDCl}_3$ )  $\delta$  177.63, 130.57, 122.31, 27.08, 20.92, 20.86, 20.78, 18.25, 14.44. HRMS (ESI-TOF)  $m/z$  Calcd for  $\text{C}_9\text{H}_{15}\text{O}_2^+$   $[\text{M}+\text{H}]^+$  155.1072, found 155.1065.

The absolute stereochemistry was assigned based on comparing the specific rotation of **3m** with literature.

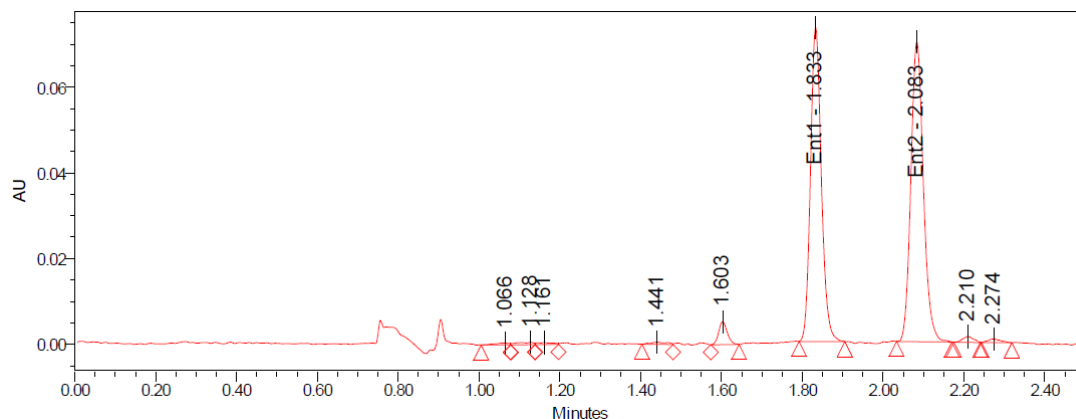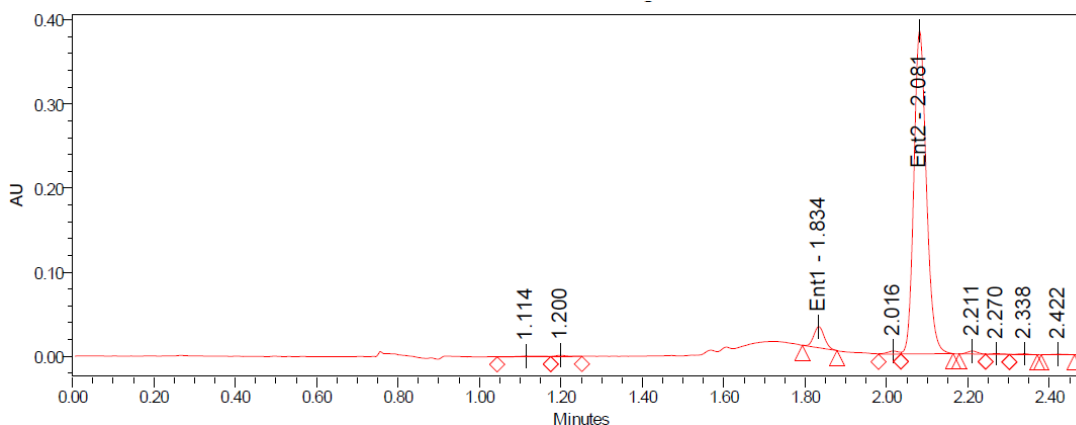

### Area Summarized by Name

|   | SampleName   | ent1  | ent2  | ee     | Ent1   | Ent2   |
|---|--------------|-------|-------|--------|--------|--------|
| 1 | HL-5e-rac    | 47.61 | 52.39 | -4.78  | 136687 | 150408 |
| 2 | HL-5e-chiral | 5.22  | 94.78 | -89.55 | 45185  | 819942 |

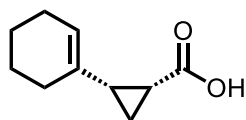

### (1R,2S)-2-(cyclohex-1-en-1-yl)cyclopropanecarboxylic acid (**8f**)

Substrate **6f** was vinylated following the general vinylation procedure (eluent: hexane/ethyl acetate = 5/1 with 1% v/v of acetic acid). The product was obtained as a colorless oil (47% yield).

The enantiomeric purity of the substrate was determined by SFC analysis (CHIRALPAK® AS-3 column, 10% *i*PrOH /  $\text{CO}_2$ , flow rate 1 mL/min, retention time 7.816 min (major) and 9.113 min (minor), 98:2 er);

$^1\text{H}$  NMR (600 MHz,  $\text{CDCl}_3$ )  $\delta$  5.60 (dq,  $J = 4.1, 1.9$  Hz, 1H), 2.07 – 1.96 (m, 3H), 1.91 (t,  $J = 8.5$  Hz, 1H), 1.82 (ddd,  $J = 9.2, 7.6, 5.5$  Hz, 2H), 1.64 – 1.49 (m, 4H), 1.40 (dt,  $J = 7.7, 5.2$  Hz, 1H), 1.10 (td,  $J = 8.0, 4.8$  Hz, 1H);  $^{13}\text{C}$  NMR (150 MHz,  $\text{CDCl}_3$ )  $\delta$  176.01, 131.41, 125.03, 28.74, 28.25, 24.74, 22.43, 21.94, 18.80, 10.91.

HRMS (ESI-TOF)  $m/z$  Calcd for  $\text{C}_{10}\text{H}_{15}\text{O}_2^+$   $[\text{M}+\text{H}]^+$  167.1072, found 167.1065.

The absolute stereochemistry was assigned based on comparing the specific rotation of **3m** with literature.

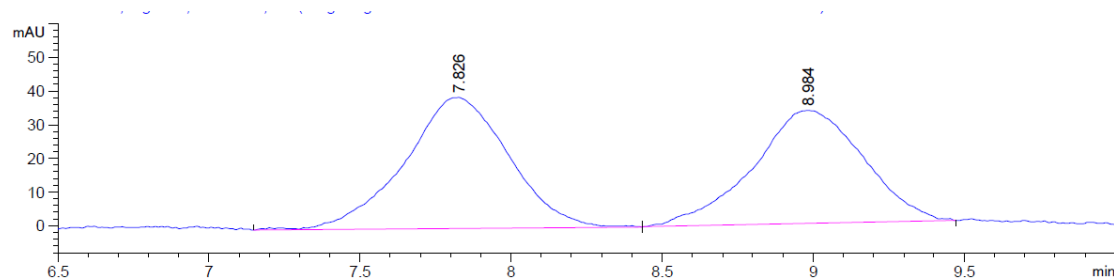

| Peak # | RetTime [min] | Type | Width [min] | Area [mAU*s] | Height [mAU] | Area %  |
|--------|---------------|------|-------------|--------------|--------------|---------|
| 1      | 7.826         | VV R | 0.3030      | 930.88171    | 38.93185     | 52.1549 |
| 2      | 8.984         | BV R | 0.3058      | 853.95709    | 33.68350     | 47.8451 |

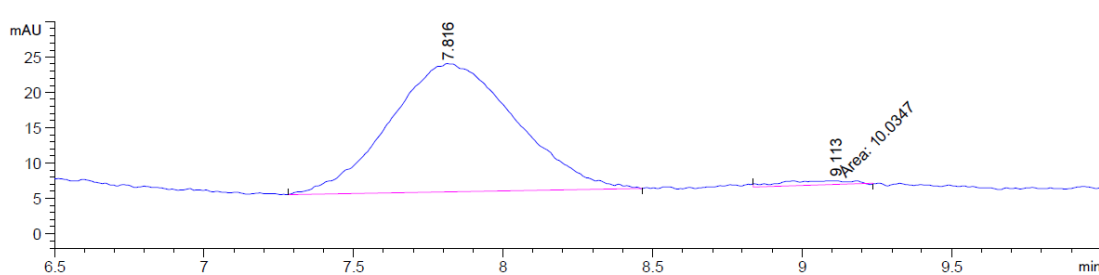

| Peak # | RetTime [min] | Type | Width [min] | Area [mAU*s] | Height [mAU] | Area %  |
|--------|---------------|------|-------------|--------------|--------------|---------|
| 1      | 7.816         | BV R | 0.3457      | 532.12018    | 18.17036     | 98.1491 |
| 2      | 9.113         | MM   | 0.3155      | 10.03466     | 5.30117e-1   | 1.8509  |

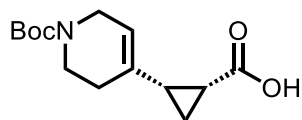

**(1R,2S)-2-(1-(tert-butoxycarbonyl)-1,2,3,6-tetrahydropyridin-4-yl)cyclopropanecarboxylic acid (8g)**

Substrate **6g** was vinyllated following the general vinyllation procedure (eluent: hexane/ethyl acetate = 2/1 with 1% v/v of acetic acid). The product was obtained as a colorless oil (51% yield).

The enantiomeric purity of the substrate was determined by SFC analysis (CHIRALPAK<sup>®</sup> IC-3 column, 10%  $^i\text{PrOH}$  /  $\text{CO}_2$ , flow rate 2 mL/min, retention time 6.855 min (major) and

8.383 min (minor), 97:3 er);

$^1\text{H}$  NMR (600 MHz,  $\text{CDCl}_3$ )  $\delta$  5.53 (s, 1H), 3.99 – 3.81 (m, 2H), 3.55 (dt,  $J = 12.8, 5.4$  Hz, 1H), 3.31 (s, 1H), 2.21 – 2.13 (m, 1H), 1.96 (q,  $J = 8.3$  Hz, 2H), 1.86 (ddd,  $J = 9.1, 7.7, 5.5$  Hz, 1H), 1.46 (s, 9H), 1.41 (dt,  $J = 7.9, 5.2$  Hz, 1H), 1.16 (td,  $J = 8.1, 4.9$  Hz, 1H);  $^{13}\text{C}$  NMR (150 MHz,  $\text{CDCl}_3$ )  $\delta$  176.84, 155.02, 131.07, 122.19, 79.55, 31.91, 29.68, 28.46, 27.63, 22.68, 14.11, 11.61.

HRMS (ESI-TOF)  $m/z$  Calcd for  $\text{C}_{14}\text{H}_{20}\text{NO}_4^-$  [M-H] $^-$  266.1392, found 266.1392.

The absolute stereochemistry was assigned based on comparing the specific rotation of **3m** with literature.

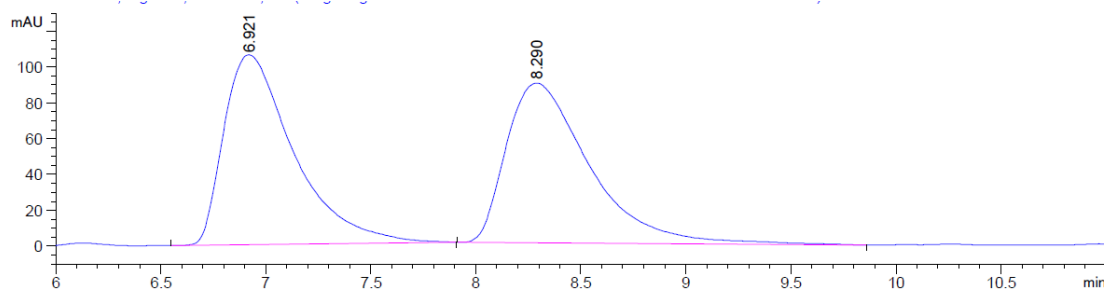

| Peak # | RetTime [min] | Type | Width [min] | Area [mAU*s] | Height [mAU] | Area %  |
|--------|---------------|------|-------------|--------------|--------------|---------|
| 1      | 6.921         | BB   | 0.3517      | 2451.06152   | 106.02688    | 49.9608 |
| 2      | 8.290         | BB   | 0.4135      | 2454.91040   | 89.08801     | 50.0392 |

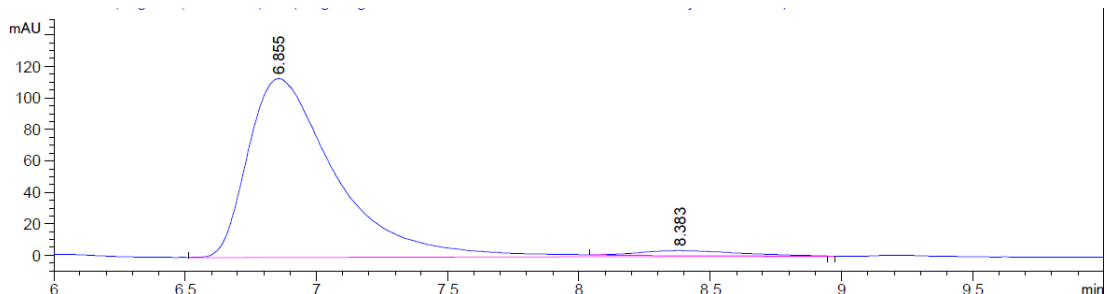

| Peak # | RetTime [min] | Type | Width [min] | Area [mAU*s] | Height [mAU] | Area %  |
|--------|---------------|------|-------------|--------------|--------------|---------|
| 1      | 6.855         | BV R | 0.3346      | 2656.87109   | 113.72182    | 96.8827 |
| 2      | 8.383         | VB E | 0.3269      | 85.48772     | 3.20762      | 3.1173  |

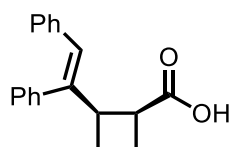

**(1S,2R)-2-((Z)-1,2-diphenylvinyl)cyclobutanecarboxylic acid (8h)**

Substrate **6h** was vinylation following the general vinylation procedure (eluent: hexane/ethyl acetate = 2/1 with 1% v/v of acetic acid). The product was obtained as a colorless oil (61% yield).



The enantiomeric purity of the substrate was determined by SFC analysis (CHIRALPAK® OJ-3 column, 5% *i*PrOH / CO<sub>2</sub>, flow rate 2 mL/min, retention time 7.478 min (major) and 9.876 min (minor), 88:12 er);

<sup>1</sup>H NMR (600 MHz, CDCl<sub>3</sub>) δ 7.19 (ddd, *J* = 4.3, 2.3, 1.2 Hz, 3H), 7.14 – 7.09 (m, 2H), 7.05 – 7.03 (m, 3H), 6.95 – 6.89 (m, 2H), 6.47 (s, 1H), 3.81 – 3.74 (m, 1H), 3.28 – 3.20 (m, 1H), 2.78 – 2.70 (m, 1H), 2.14 (dddd, *J* = 9.4, 7.9, 5.9, 3.4 Hz, 2H); <sup>13</sup>C NMR (150 MHz, CDCl<sub>3</sub>) δ 178.51, 141.42, 140.20, 137.07, 129.24, 128.75, 128.36, 127.78, 127.02, 126.91, 126.33, 45.18, 44.40, 24.50, 20.21.

HRMS (ESI-TOF) *m/z* Calcd for C<sub>19</sub>H<sub>17</sub>O<sub>2</sub><sup>-</sup> [M-H]<sup>-</sup> 277.1229, found 277.1226.

The absolute stereochemistry was assigned based on comparing the specific rotation of **5u** with literature.

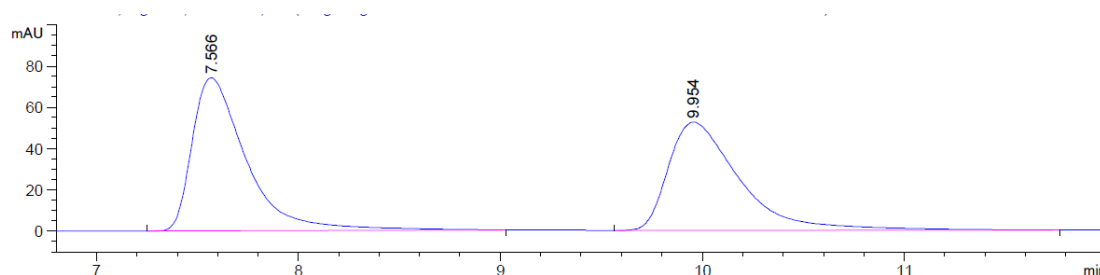

| Peak # | RetTime [min] | Type | Width [min] | Area [mAU*s] | Height [mAU] | Area %  |
|--------|---------------|------|-------------|--------------|--------------|---------|
| 1      | 7.566         | BB   | 0.2792      | 1382.54333   | 74.26161     | 51.8243 |
| 2      | 9.954         | BB   | 0.3741      | 1285.20544   | 52.41679     | 48.1757 |

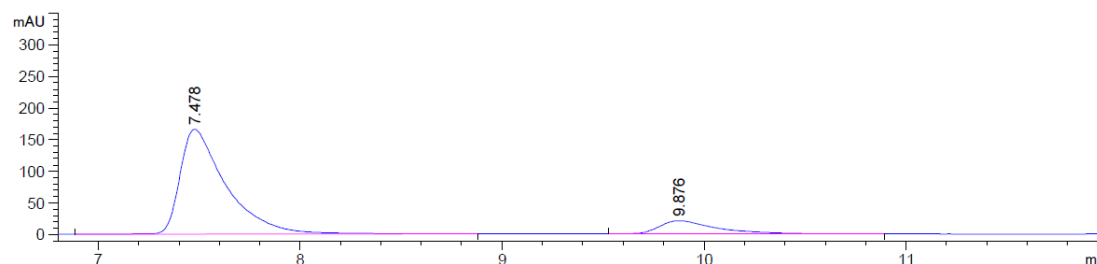

| Peak # | RetTime [min] | Type | Width [min] | Area [mAU*s] | Height [mAU] | Area %  |
|--------|---------------|------|-------------|--------------|--------------|---------|
| 1      | 7.478         | BB   | 0.2308      | 5079.21924   | 317.22769    | 88.1404 |
| 2      | 9.876         | MM   | 0.2967      | 683.42407    | 38.38791     | 11.8596 |

### 3.8 Synthesis of Cis-Chiral Amine from Carboxylic Acid

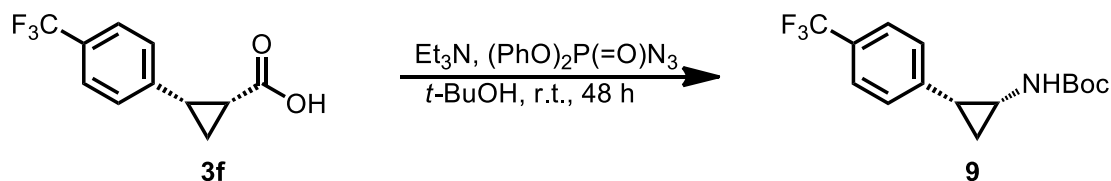

To a solution of tert-butyl ((1R,2R)-2-(4-(trifluoromethyl)phenyl)cyclopropyl)carbamate (46 mg, 0.2 mmol, 97:3 er.) and Et<sub>3</sub>N (31 uL, 0.22 mmol) in anhydrous *t*-BuOH (1 mL) was added diphenylphosphoryl azide (47 uL, 0.22 mmol) dropwise. The reaction was heated at 80 °C and stirred for 48 h before cooling to r.t. and concentrating in vacuo. Et<sub>2</sub>O (20 mL) and water (40 mL) were added. The organic portion was isolated and the aqueous phase was extracted with Et<sub>2</sub>O (2 × 30 mL). The organics extracts were combined, washed with sat. aq. NaHCO<sub>3</sub> (20 mL) and brine (20 mL), dried over Na<sub>2</sub>SO<sub>4</sub> and concentrated in vacuo. The residue was purified by flash column chromatography (5 % EtOAc/hexane) to yield the title compound (43.3 mg, 72 %) as a white solid. <sup>1</sup>H NMR (600 MHz, CDCl<sub>3</sub>) δ 7.53 (d, *J* = 8.1 Hz, 2H), 7.32 (d, *J* = 7.9 Hz, 2H), 4.35 (s, 1H), 2.97 (s, 1H), 2.28 (d, *J* = 9.0 Hz, 1H), 1.37 (dt, *J* = 8.9, 6.8 Hz, 1H), 1.28 (s, 9H), 1.08 (s, 1H); <sup>13</sup>C NMR (150 MHz, CDCl<sub>3</sub>) δ 156.17, 141.13, 129.01, 128.46 (q, *J* = 36.0 Hz), 124.83 (q, *J* = 4.5 Hz), 124.31 (q, *J* = 270.0 Hz), 79.59, 29.65, 28.07, 22.43, 12.14; <sup>19</sup>F NMR (375 MHz, CDCl<sub>3</sub>) δ -62.62. [α]<sub>D</sub><sup>20</sup> = 13.2 (c = 1.0, CHCl<sub>3</sub>). The enantiomeric purity of the substrate was determined by SFC analysis (CHIRALPAK® OD-3 column, 10% *i*PrOH / CO<sub>2</sub>, flow rate 2 mL/min, retention time 3.020 min (minor) and 3.986 min (major), 97:3 er);

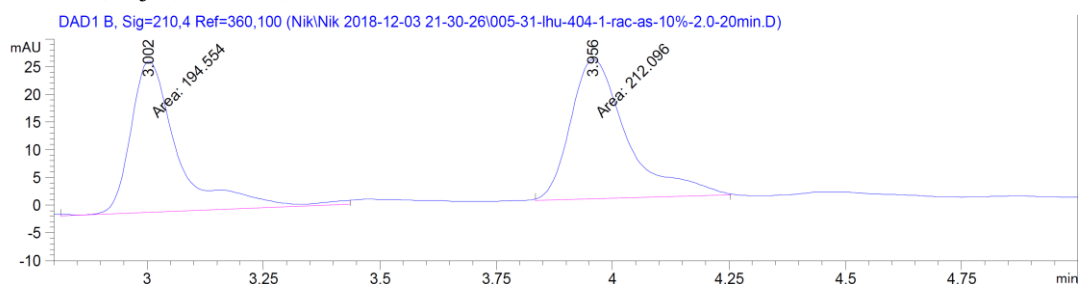

| Peak # | RetTime [min] | Type | Width [min] | Area [mAU*s] | Height [mAU] | Area %  |
|--------|---------------|------|-------------|--------------|--------------|---------|
| 1      | 3.002         | MM   | 0.1183      | 194.55423    | 27.40913     | 47.8432 |
| 2      | 3.956         | MM   | 0.1399      | 212.09579    | 25.26016     | 52.1568 |

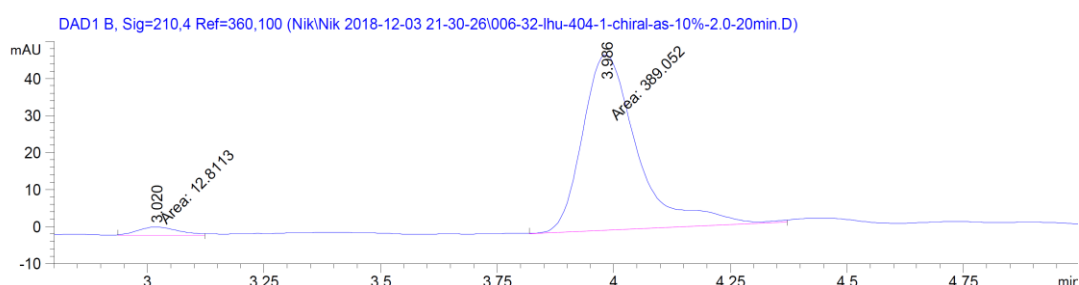

| Peak # | RetTime [min] | Type | Width [min] | Area [mAU*s] | Height [mAU] | Area %  |
|--------|---------------|------|-------------|--------------|--------------|---------|
| 1      | 3.020         | MM   | 0.0981      | 12.81127     | 2.17736      | 3.1880  |
| 2      | 3.986         | MM   | 0.1363      | 389.05157    | 47.55794     | 96.8120 |

## 4. Reference

1. Xiao, K.-J.; Lin, D. W.; Miura, M.; Zhu, R.-Y.; Gong, W.; Wasa, M.; Yu, J.-Q. *J. Am. Chem. Soc.* **2014**, *136*, 8138.
2. Li, J.; Luo, S.; Cheng, J. P. *J. Org. Chem.* **2009**, *74*, 1747.
3. Ishihara, K.; Nakano, K. *J. Am. Chem. Soc.* **2005**, *127*, 10504.
4. Nagamine, T.; Inomata, K.; Endo, Y. *Heterocycles* **2008**, *76*, 1191.
5. Wasa, M.; Engle, K. M.; Lin, D. W.; Yoo, E. J.; Yu, J.-Q. *J. Am. Chem. Soc.* **2011**, *133*, 19598.
6. Santen Pharmaceutical Co., Ltd *EP2119703* **2009**, A1.
7. Wyeth *US2008/255192* **2008**, A1
8. Giri, R.; Wasa, M.; Breazzano, S. P.; Yu, J.-Q. *Org. Lett.* **2006**, *8*, 5685.
9. Jahngen, E. G. E.; Phillips, D.; Kobelski, R. J.; Demko, D. M. *J. Org. Chem.* **1983**, *48*, 2472.
10. Chen, K.; Li, Z.-W.; Shen, P.-X.; Zhao, H.-W.; Shi, Z.-J. *Chem. Eur. J.* **2015**, *21*, 7389.
11. Schiefer, I. T.; Abdul-Hay, S.; Wang, H.; Vanni, M.; Qin, Z.; Thatcher, G. R. J. *J. Med. Chem.* **2011**, *54*, 2293.
12. Elling, G.R.; Hahn, R. C.; Schwab, G. *J. Am. Chem. Soc.* **1973**, *17*, 5659.
13. Wu, Q.-F.; Shen, P.-X.; He, J.; Wang, X.-B.; Zhang, F.; Shao, Q.; Zhu, R.-Y.; Mapelli, C.; Qiao, J. X.; Poss, M. A.; Yu, J.-Q. *Science* **2017**, *355*, 499.
14. Shen, P.-X.; Hu, L.; Shao, Q.; Hong, K.; Yu, J.-Q. *J. Am. Chem. Soc.* **2018**, *140*, 6545.

## 5. X-Ray Crystallographic Data of Compounds

Figure S1 X-Ray Structure 5p

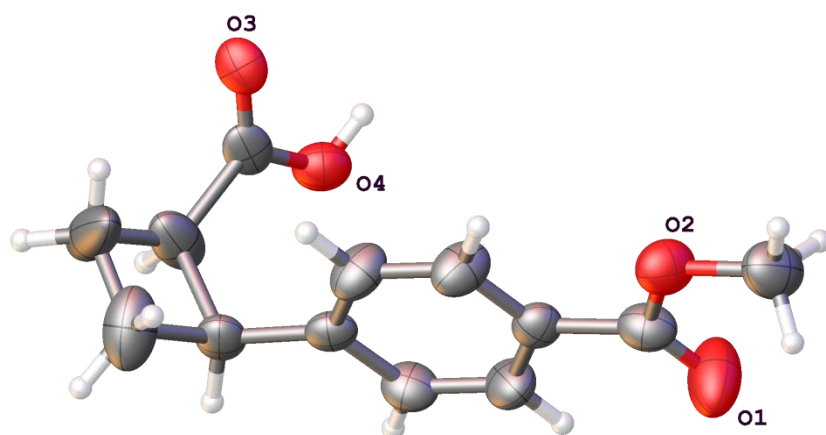

Table 1. Crystal data and structure refinement for 5p

|                                 |                                                                                 |
|---------------------------------|---------------------------------------------------------------------------------|
| CCDC number                     | 1870087                                                                         |
| Empirical formula               | C <sub>13</sub> H <sub>14</sub> O <sub>4</sub>                                  |
| Formula weight                  | 234.24                                                                          |
| Temperature                     | 100.0 K                                                                         |
| Wavelength                      | 1.54178 Å                                                                       |
| Crystal system                  | Trigonal                                                                        |
| Space group                     | P3 <sub>1</sub>                                                                 |
| Unit cell dimensions            | a = 15.8015(7) Å = 90°.<br>b = 15.8015(7) Å = 90°.<br>c = 16.3042(10) Å = 120°. |
| Volume                          | 3525.5(4) Å <sup>3</sup>                                                        |
| Z, Z'                           | 12, 4                                                                           |
| Density (calculated)            | 1.324 Mg/m <sup>3</sup>                                                         |
| Absorption coefficient          | 0.815 mm <sup>-1</sup>                                                          |
| F(000)                          | 1488                                                                            |
| Crystal size                    | 0.20 x 0.17 x 0.11 mm <sup>3</sup>                                              |
| Theta range for data collection | 3.229 to 68.408°.                                                               |
| Index ranges                    | -18<=h<=19, -19<=k<=19, -19<=l<=19                                              |
| Reflections collected           | 52265                                                                           |
| Independent reflections         | 8620 [R(int) = 0.0417]                                                          |
| Completeness to theta = 67.679° | 100.0 %                                                                         |
| Absorption correction           | Semi-empirical from equivalents                                                 |
| Max. and min. transmission      | 0.7531 and 0.6705                                                               |
| Refinement method               | Full-matrix least-squares on F <sup>2</sup>                                     |

|                                      |                                       |
|--------------------------------------|---------------------------------------|
| Data / restraints / parameters       | 8620 / 4 / 634                        |
| Goodness-of-fit on $F^2$             | 1.039                                 |
| Final R indices [ $I > 2\sigma(I)$ ] | R1 = 0.0398, wR2 = 0.1082             |
| R indices (all data)                 | R1 = 0.0413, wR2 = 0.1097             |
| Absolute structure parameter         | 0.08(5)                               |
| Extinction coefficient               | n/a                                   |
| Largest diff. peak and hole          | 0.328 and -0.171 e. $\text{\AA}^{-3}$ |

## 6. NMR Spectra

h1-64-6-2-p-co2me.1.fid

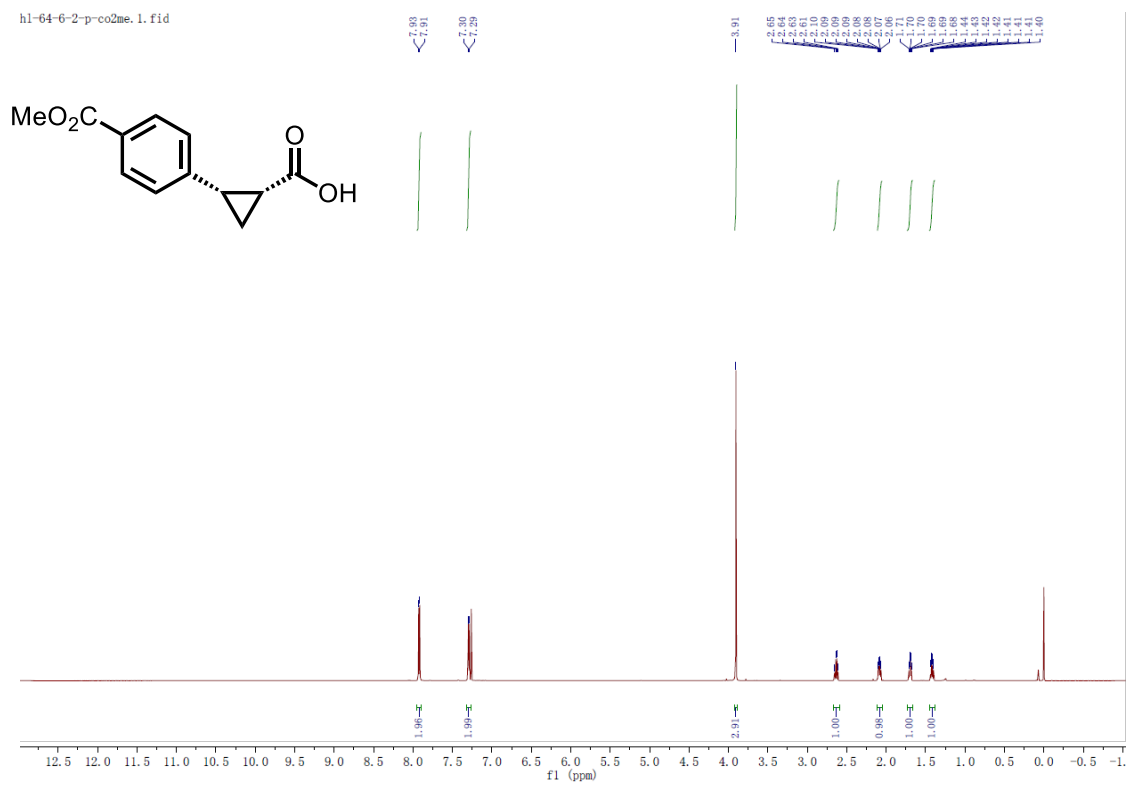

h1-64-6-2-p-co2me.12.fid

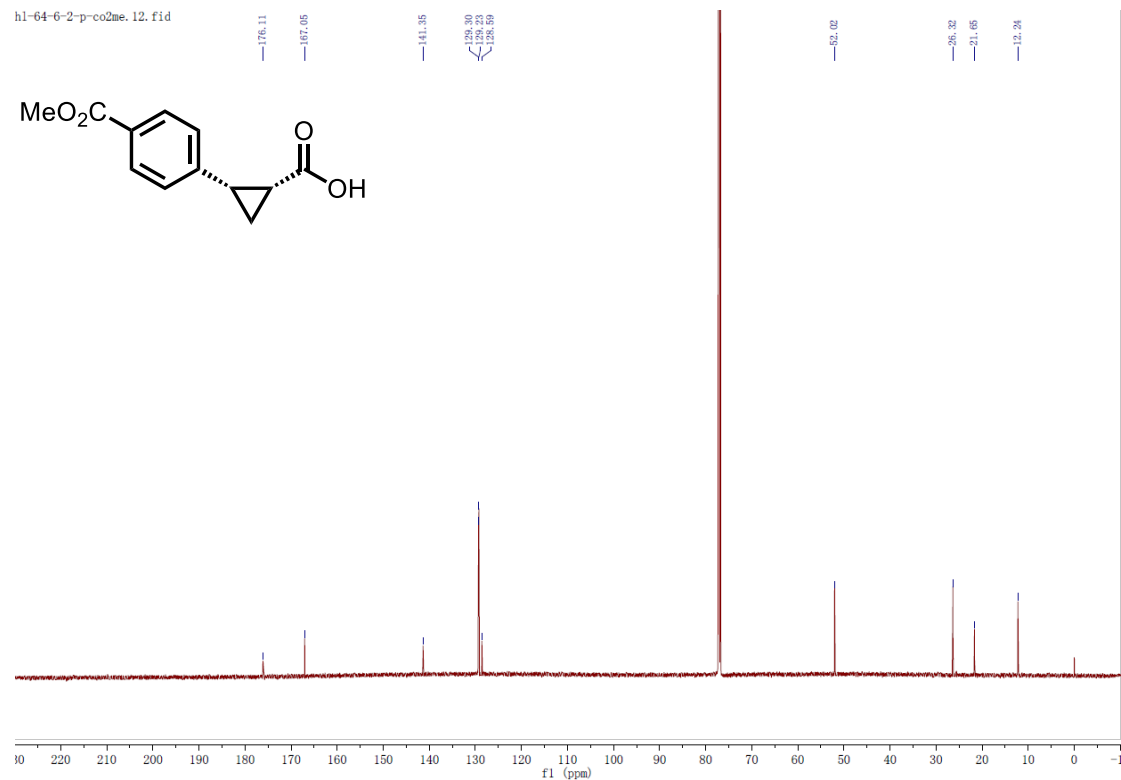

h1-66-2-p-ac. 1. fid

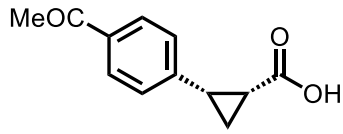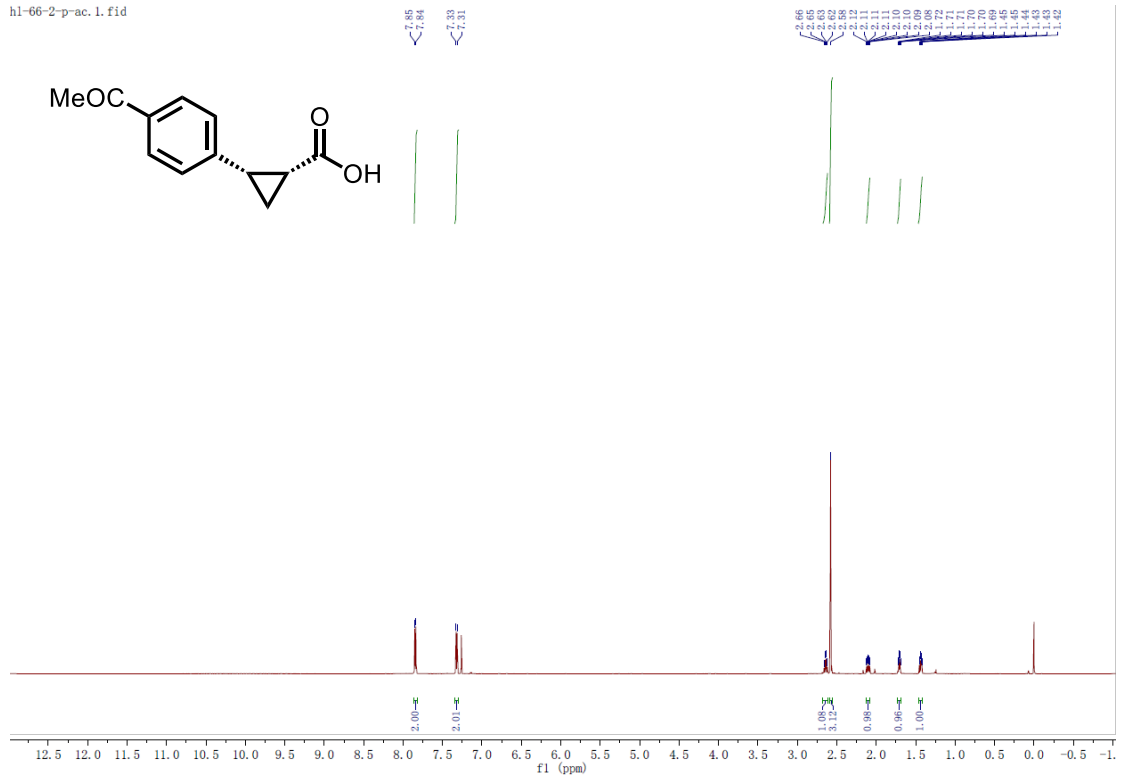

h1-66-2-p-ac. 2. fid

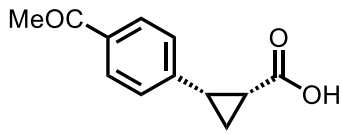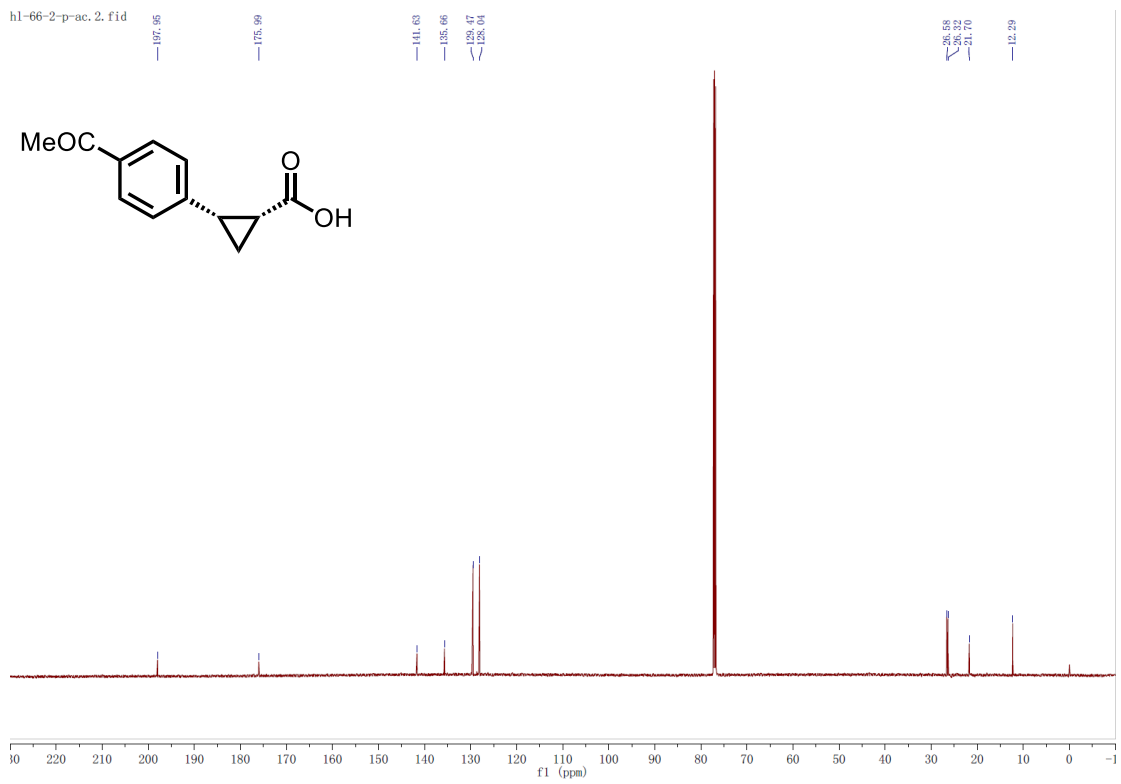

h1-67-1-2-p-cf3.1.fid

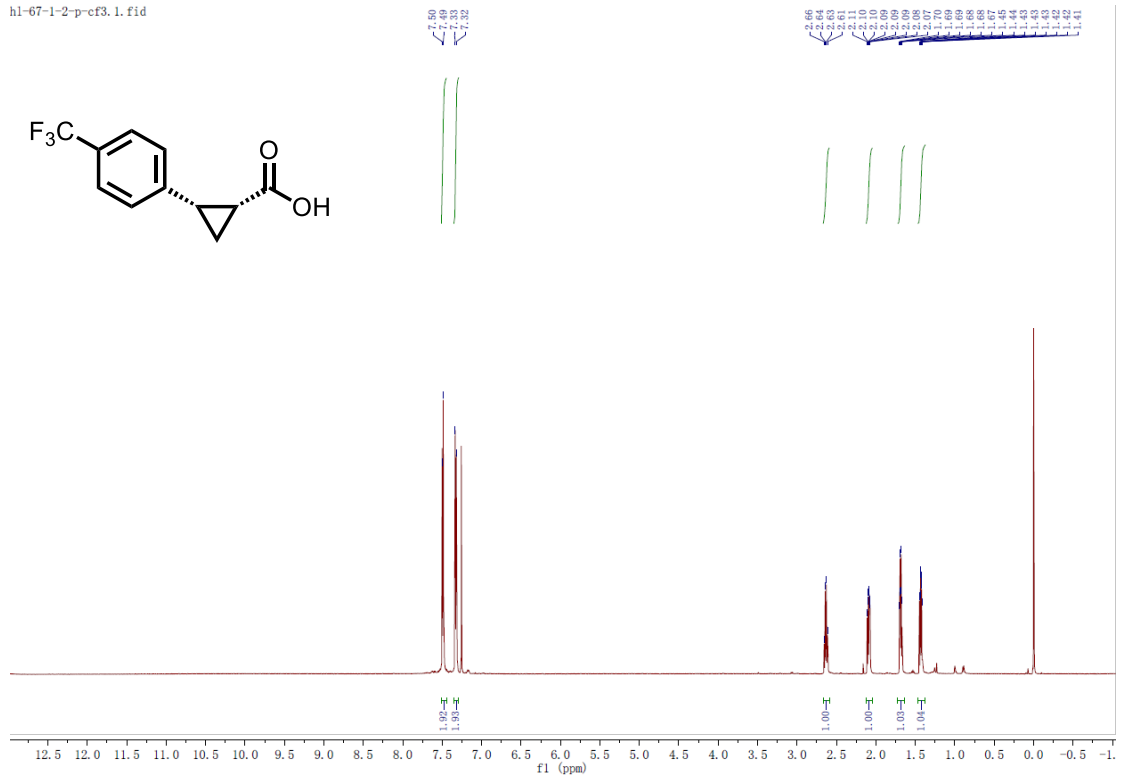

h1-67-1-2-p-cf3.2.fid

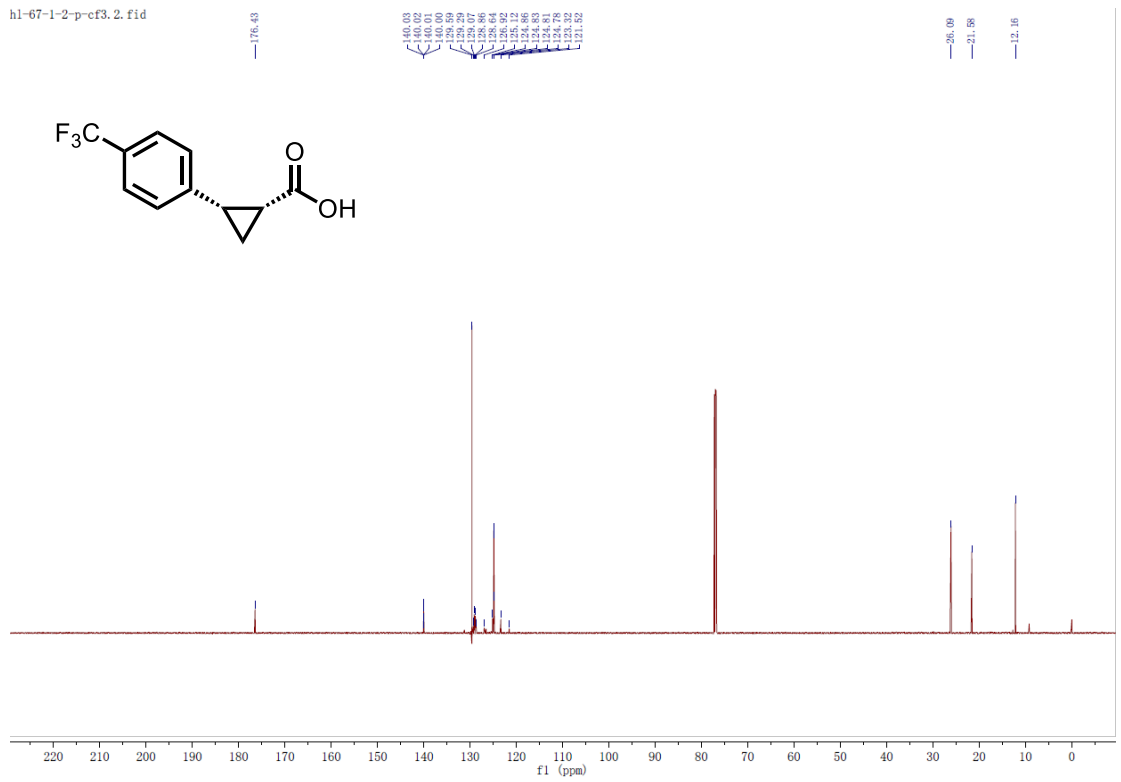



lhu-p-cf3-f.18.fid

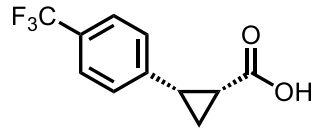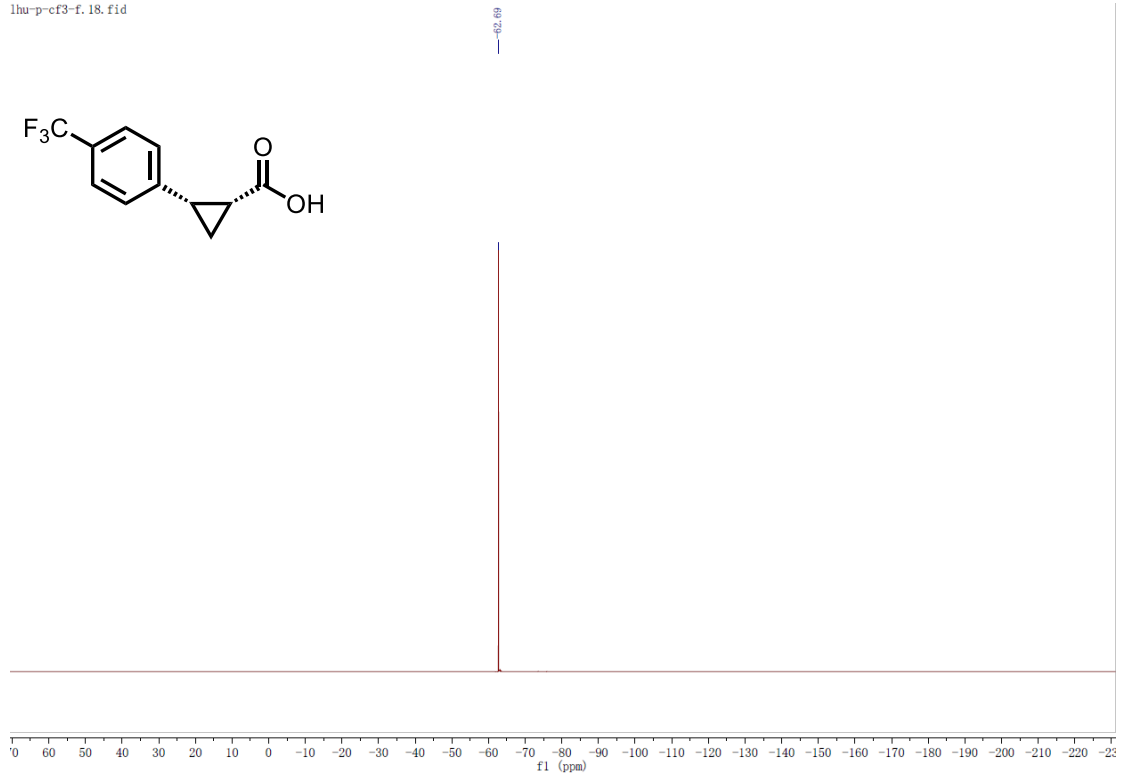

h1-66-1-p-no2.1.fid

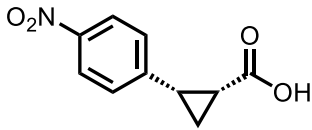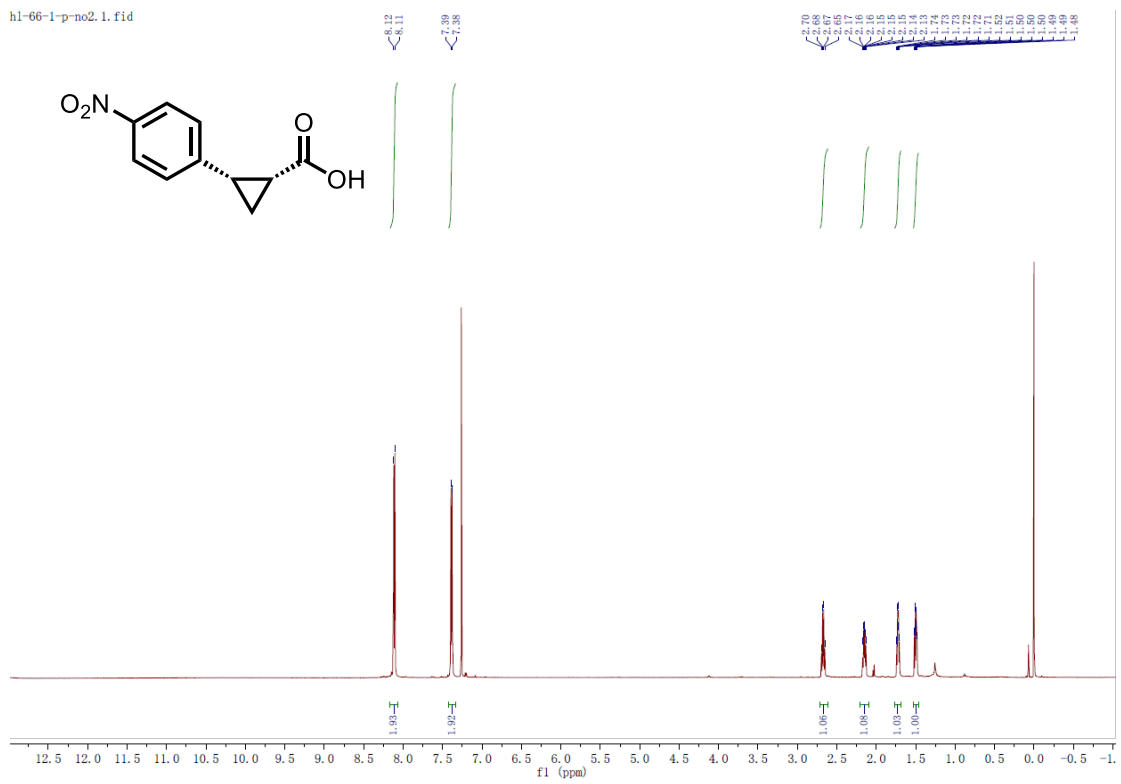

h1-66-1-p-no2.2.fid

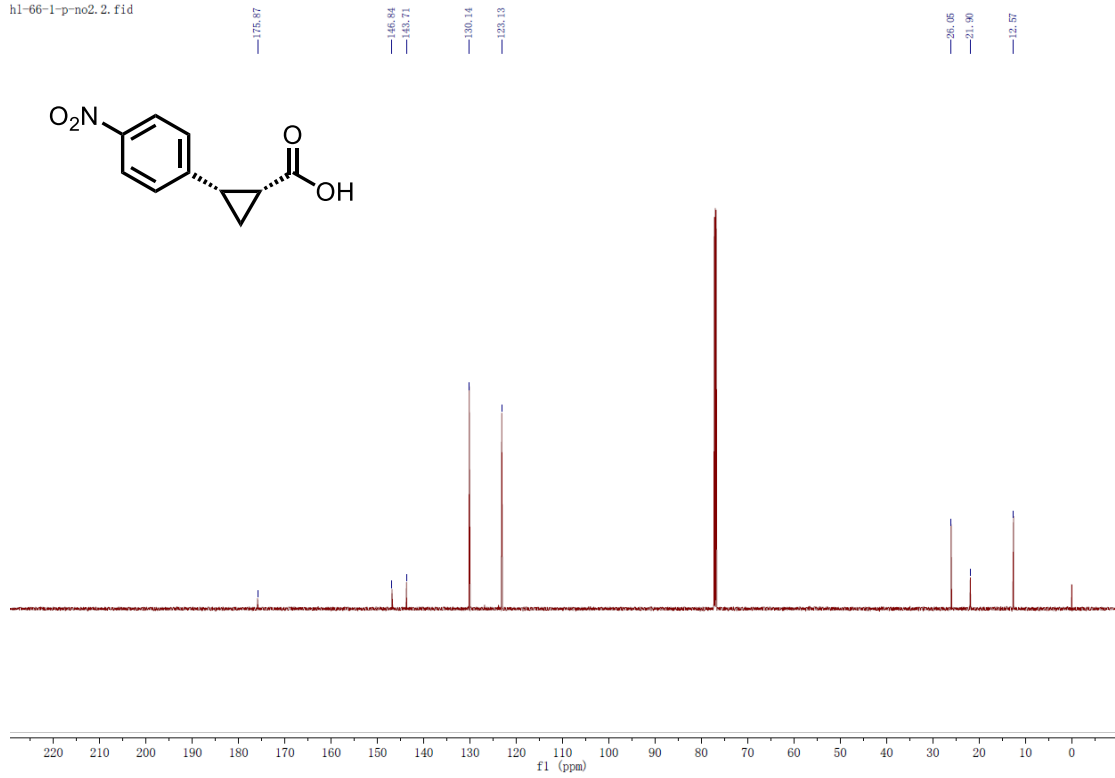

h1-65-3-2-p-cn.1.fid

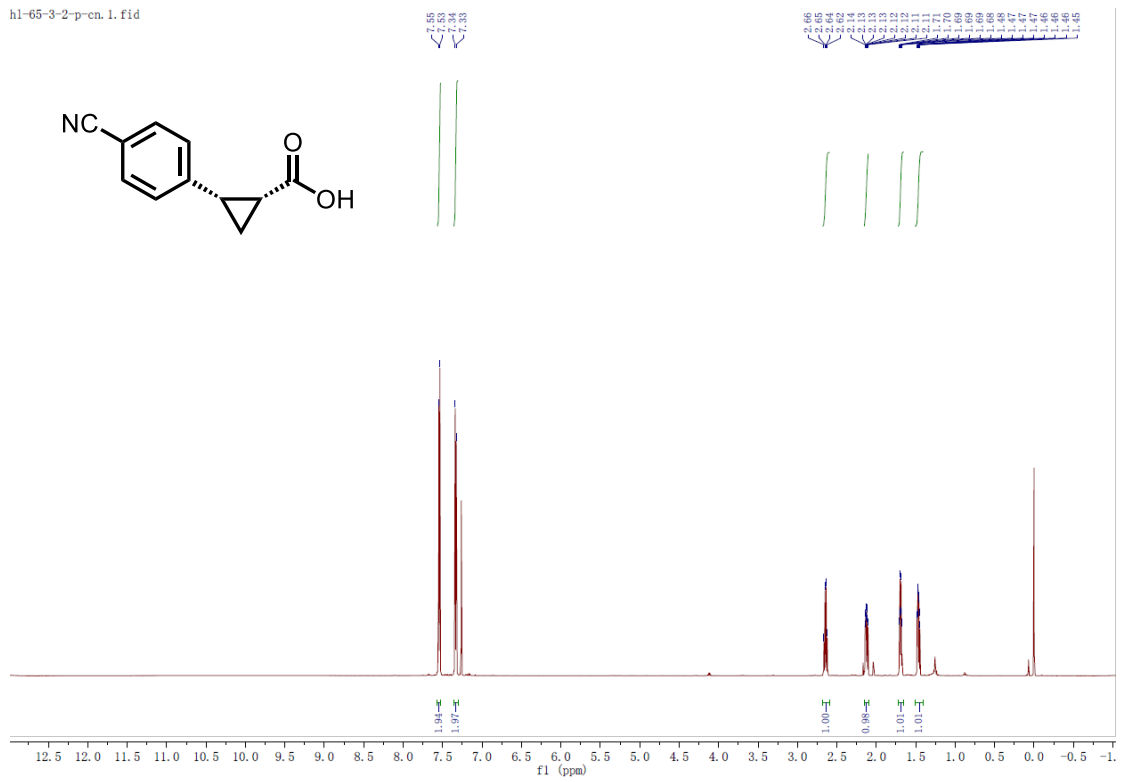

h1-65-3-2-p-cn. 2. fid

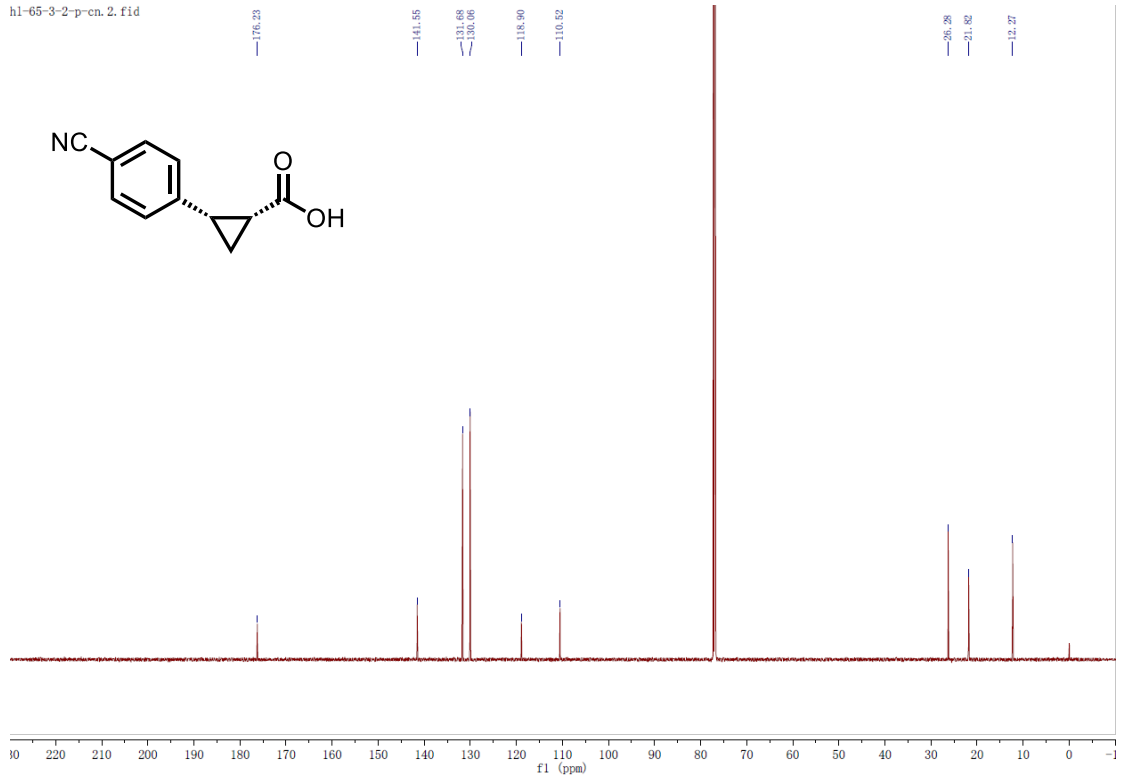

h1-67-3-2-p-f. 1. fid

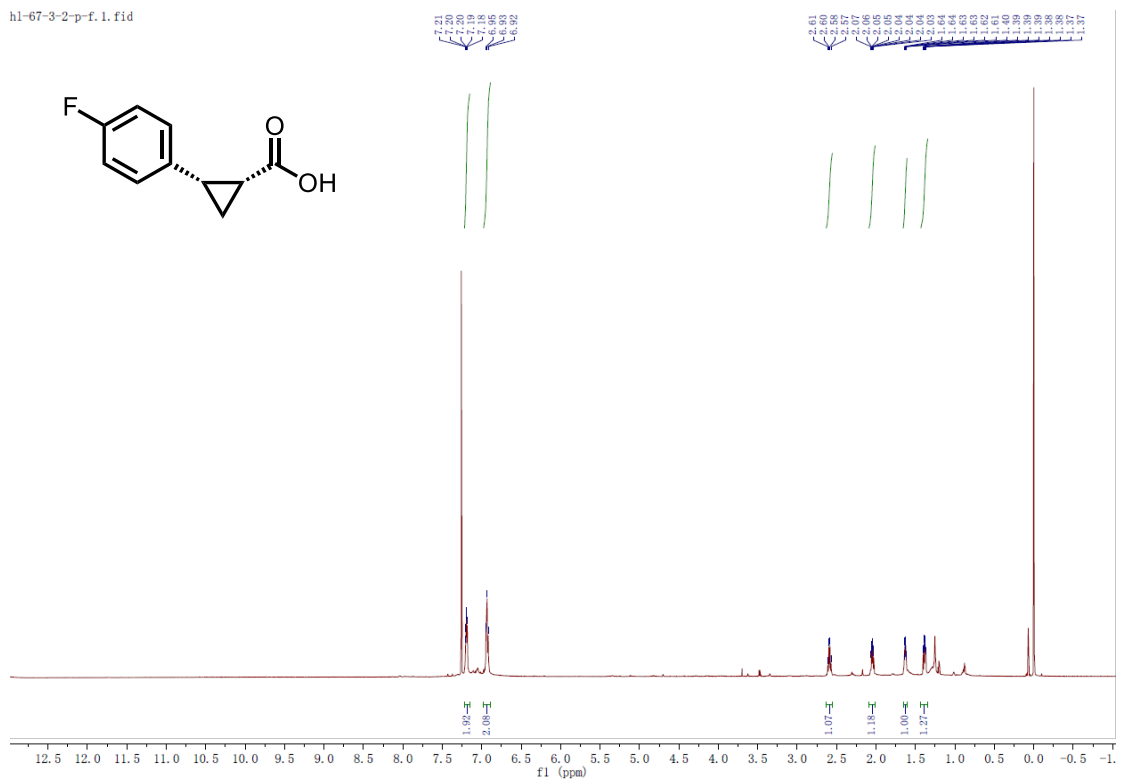

hl-67-3-2-p-f.2.fid

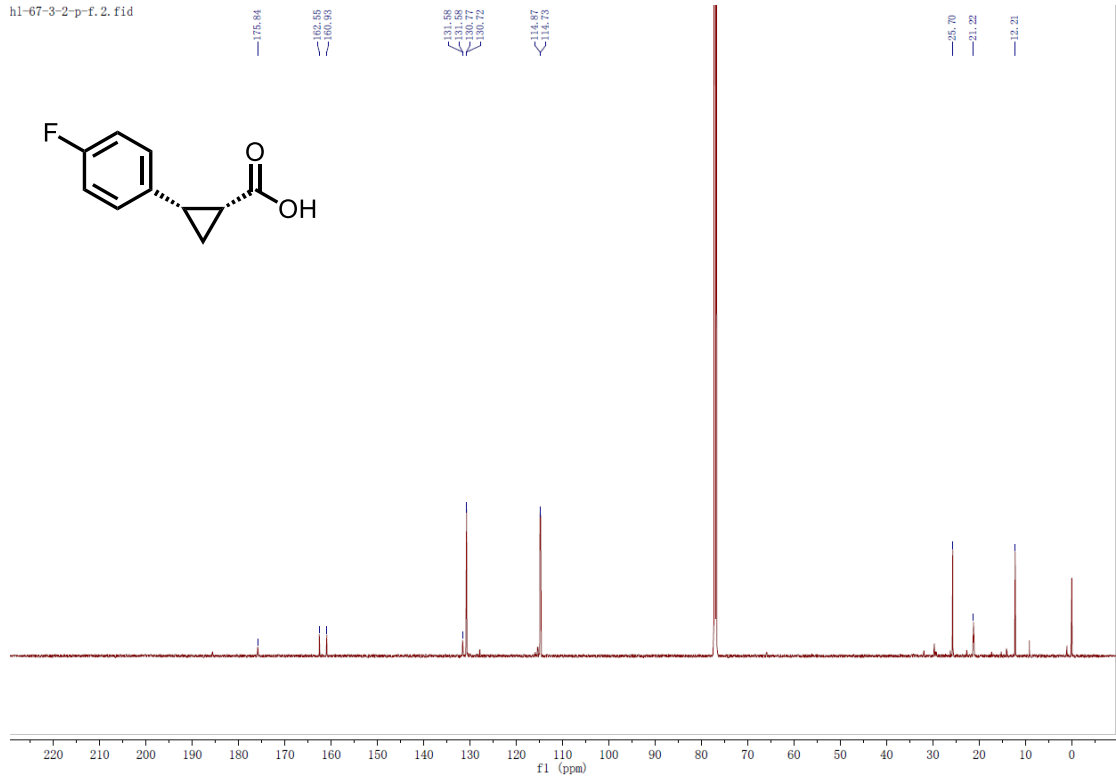

lhu-p-f-f-2.17.fid

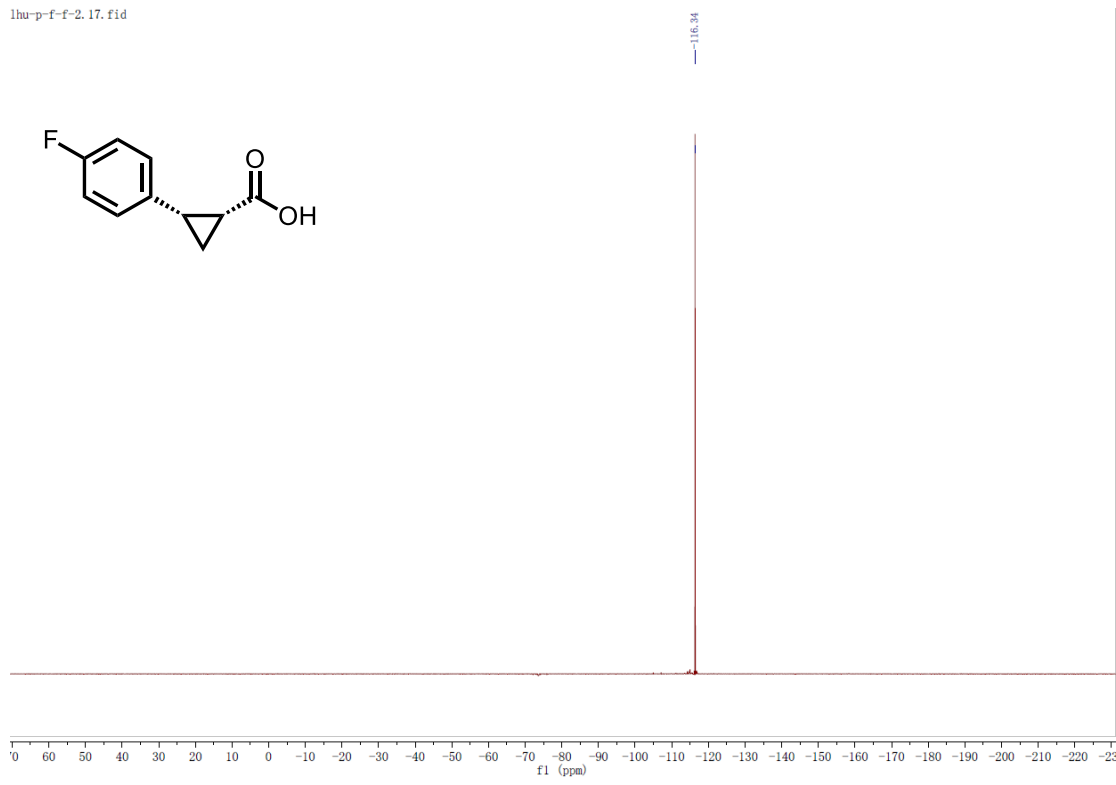

h1-67-2-2-p-cl.1.fid

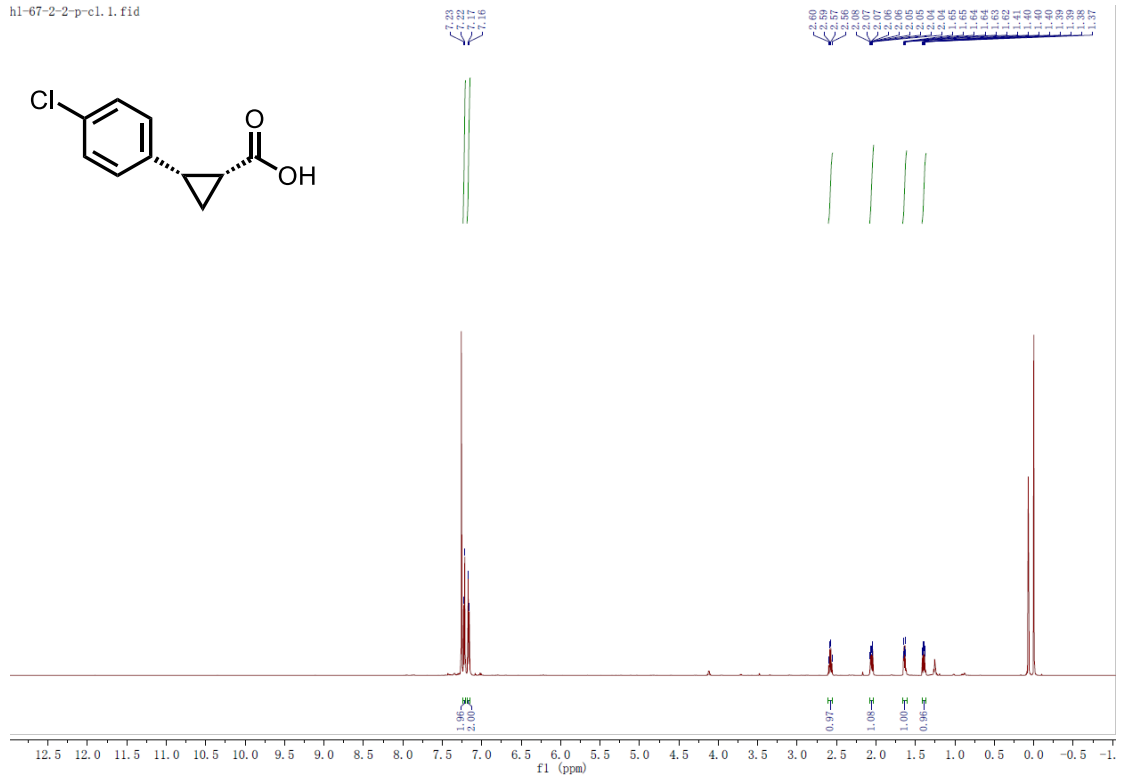

h1-67-2-2-p-cl.2.fid

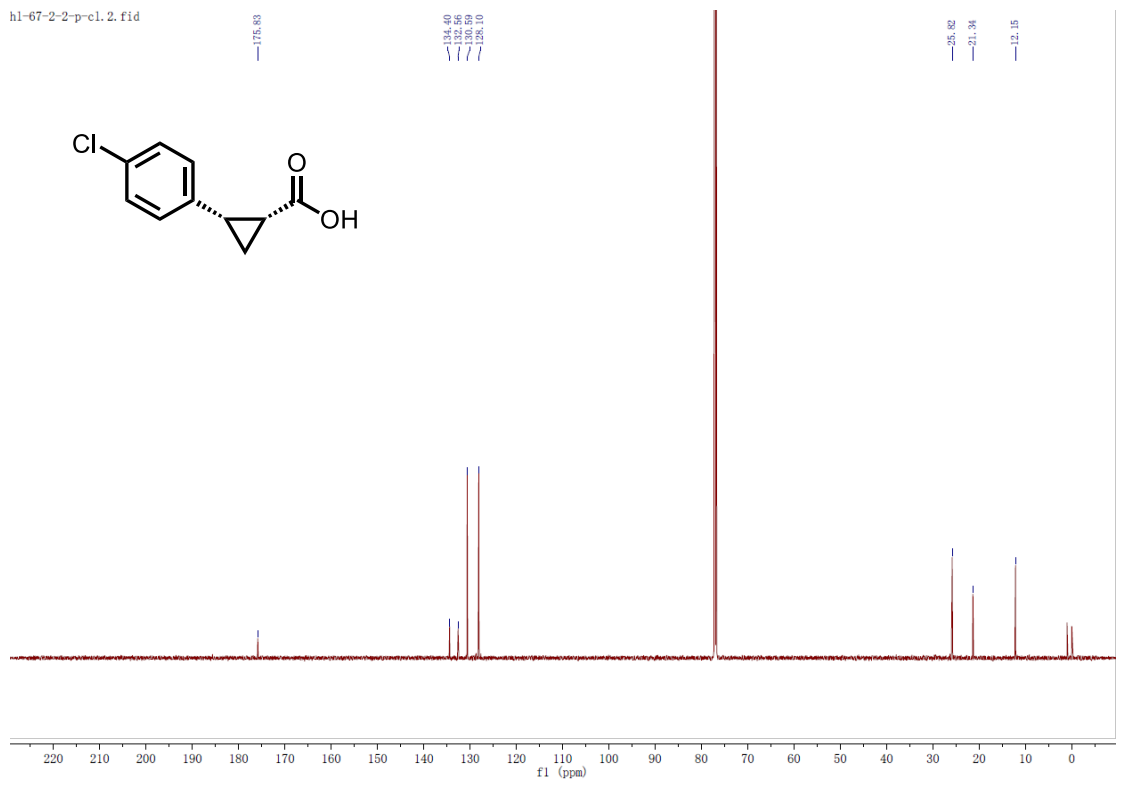

hl-p-methyl.1.fid

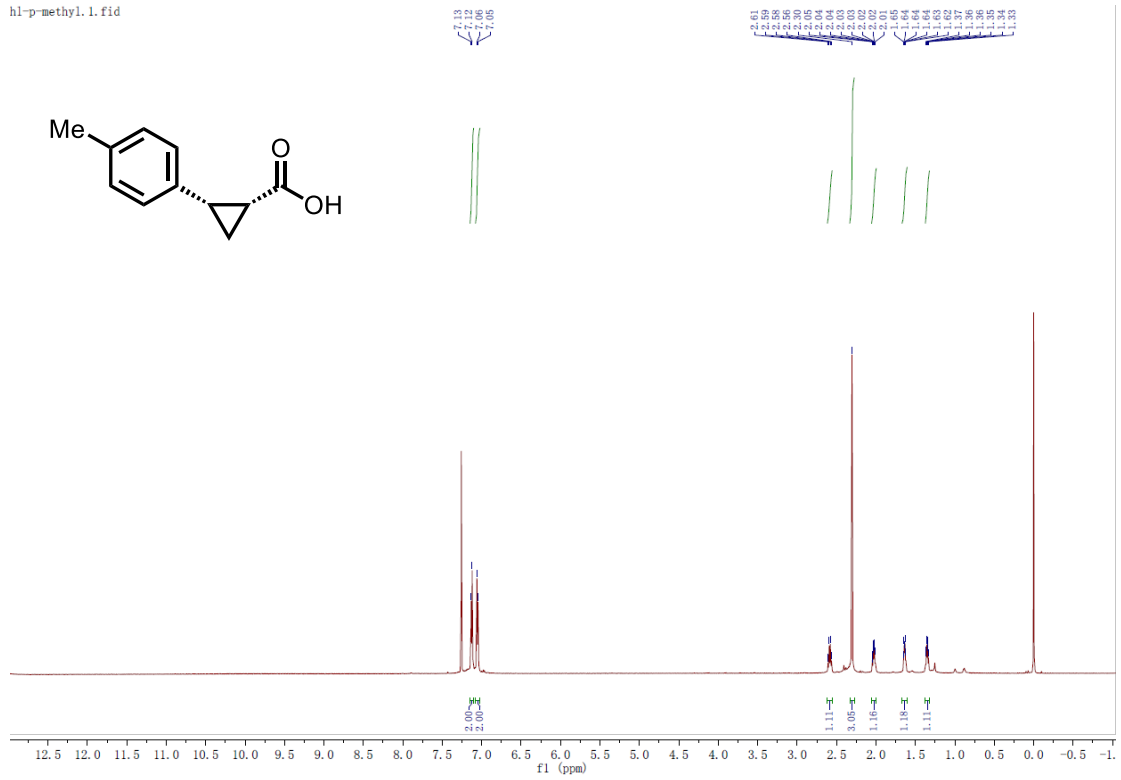

hl-p-methyl.2.fid

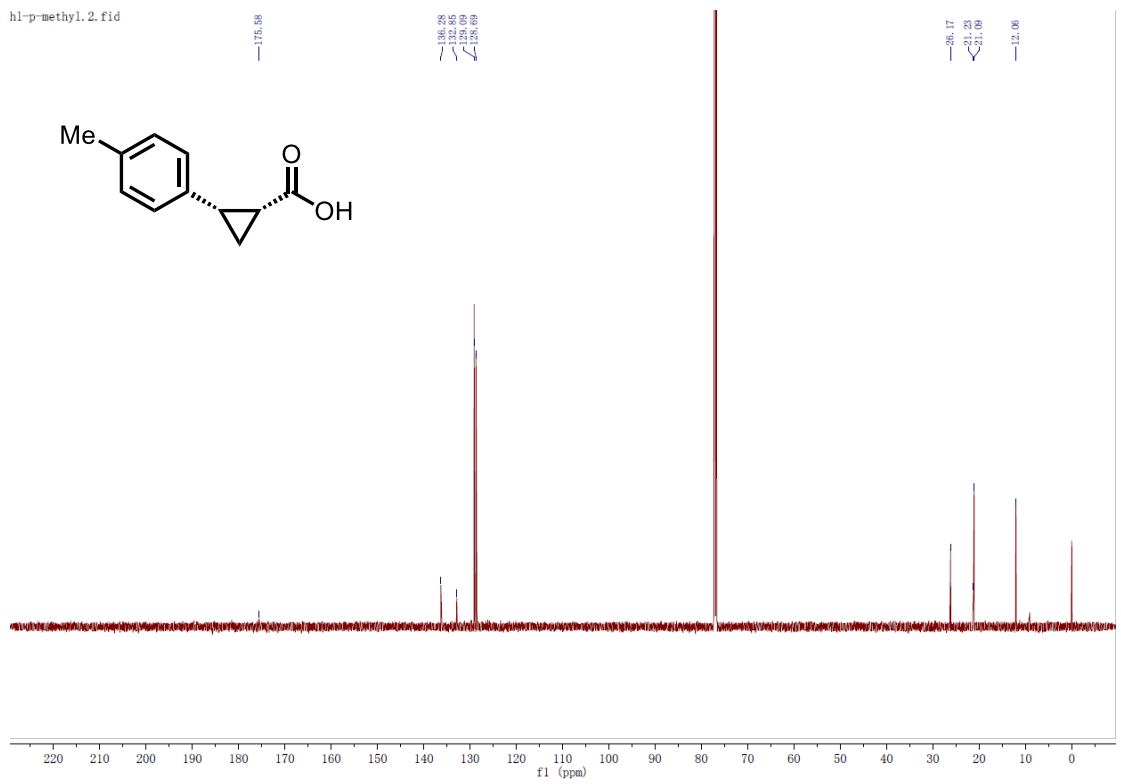

lhu-357-p-ocf3-h. 6. fid

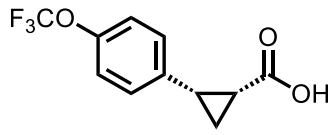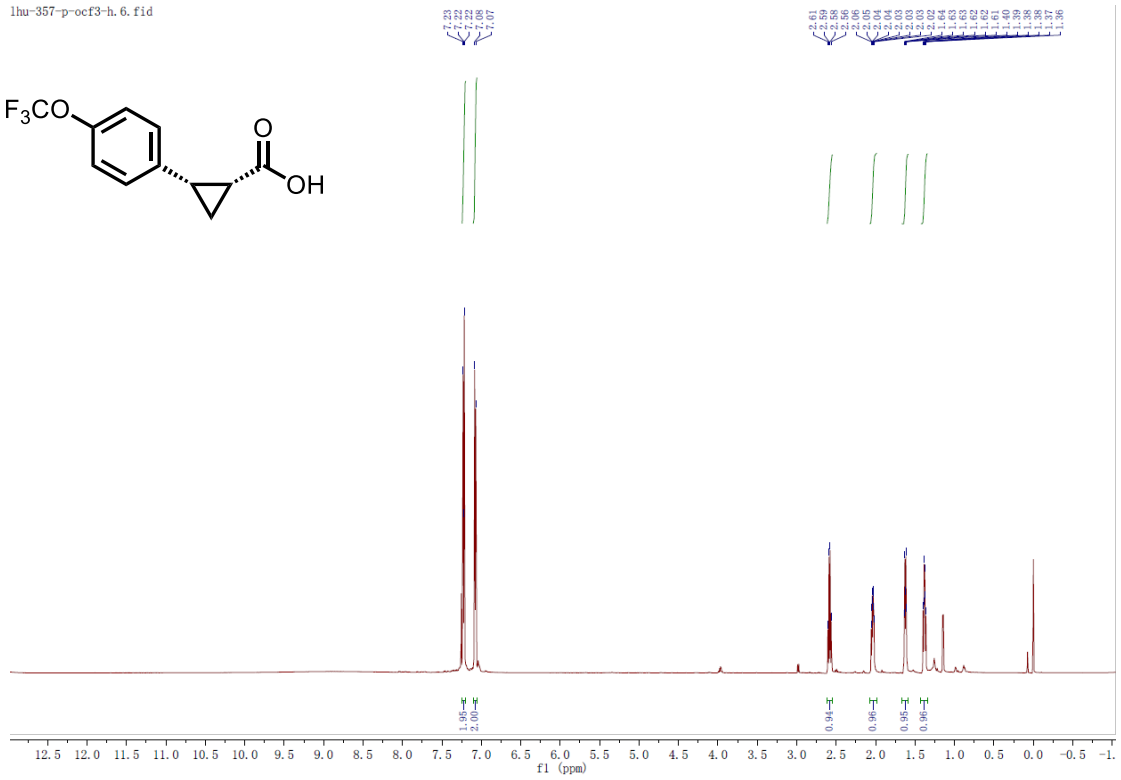

lhu-357-p-ocf3-c. 7. fid

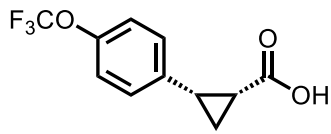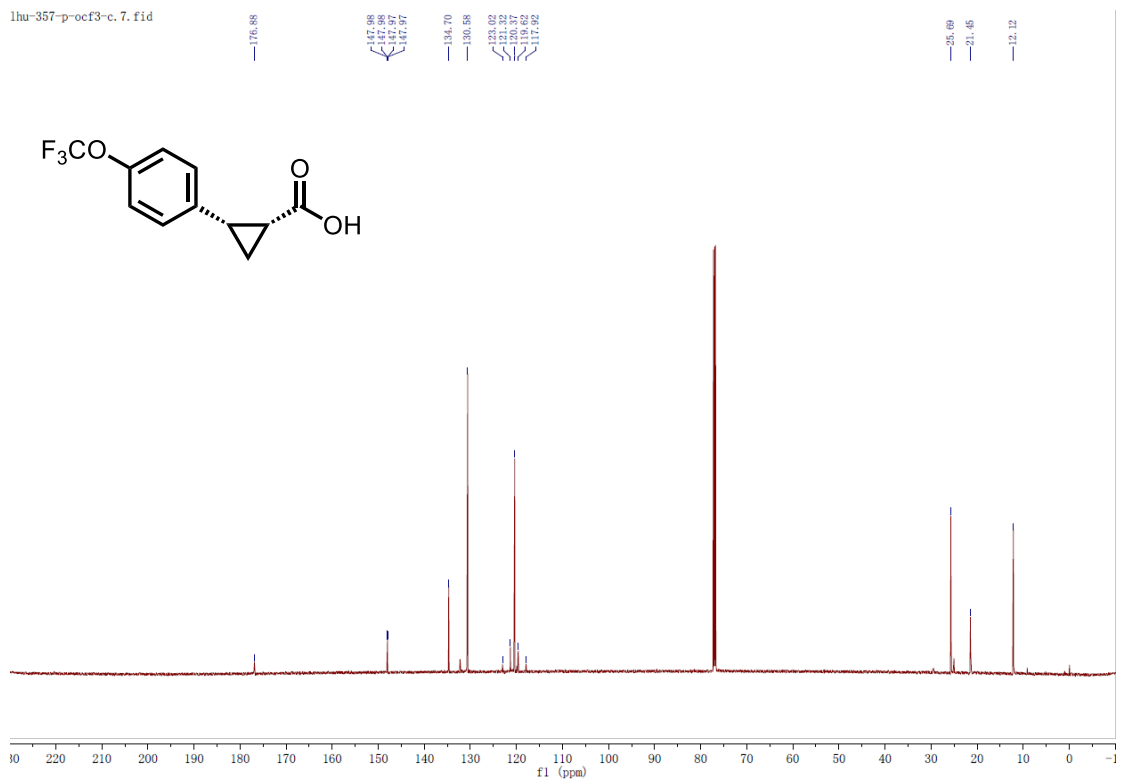

lhu-357-p-ocf3-f. 15. fid

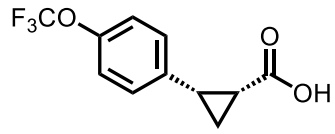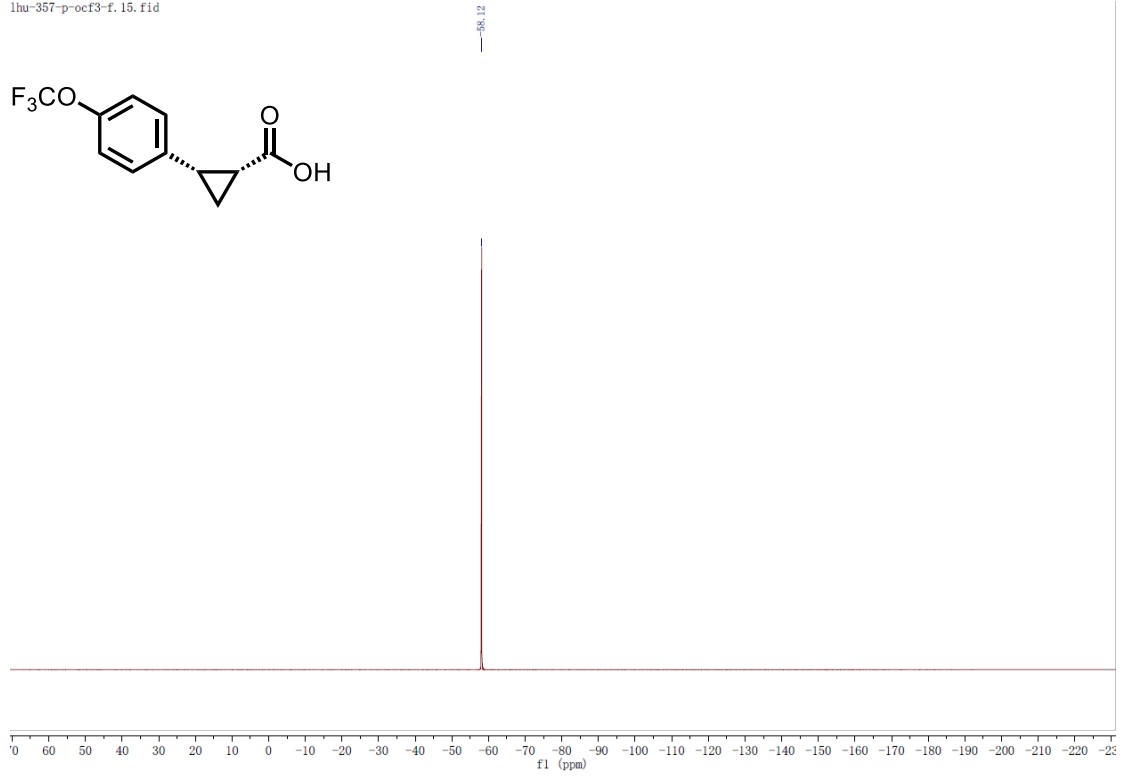

lhu-m-cf3-h-2.18. fid

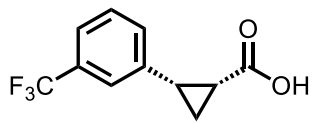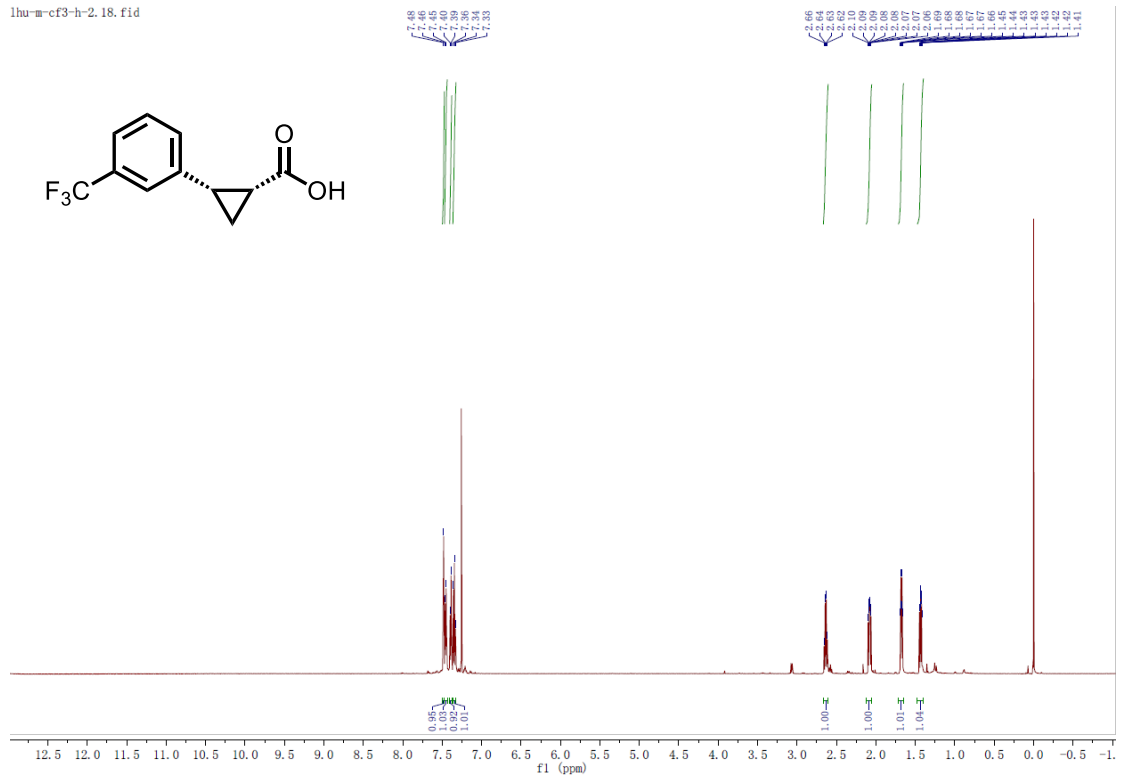





h1-64-5-2-m-co2me.1.fid

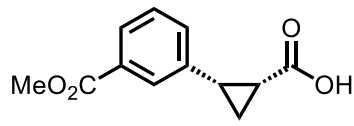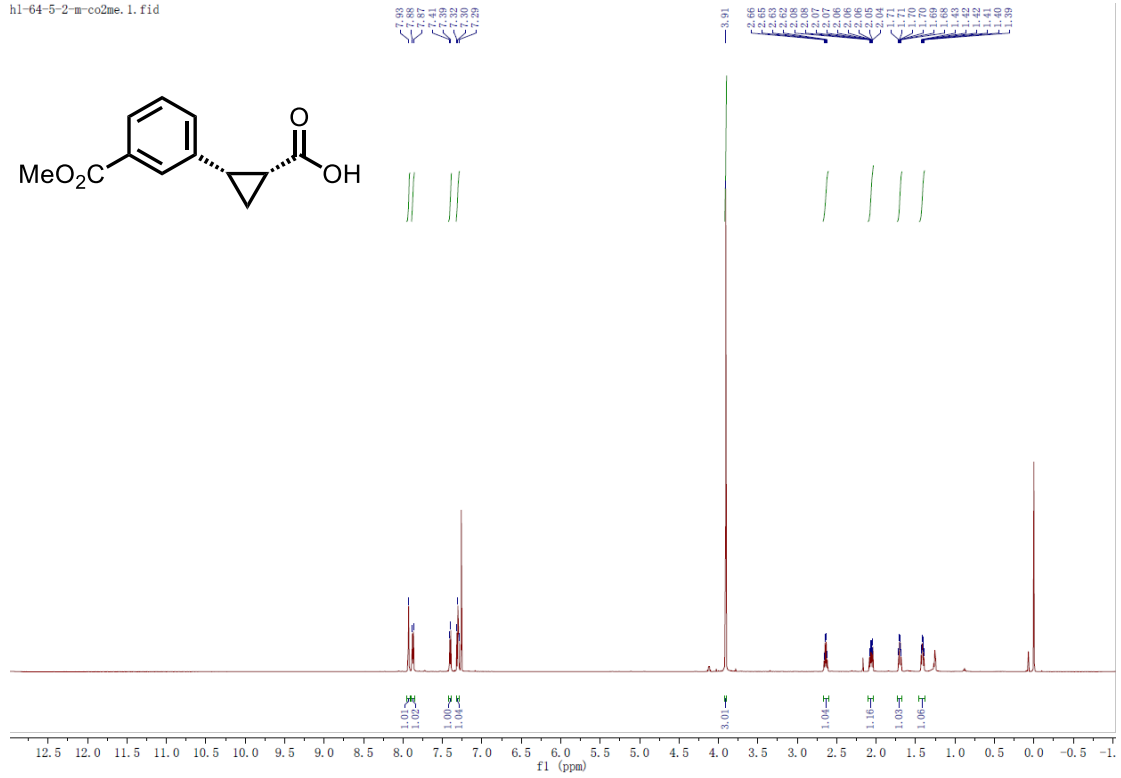

h1-64-5-2-m-co2me.2.fid

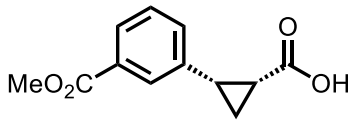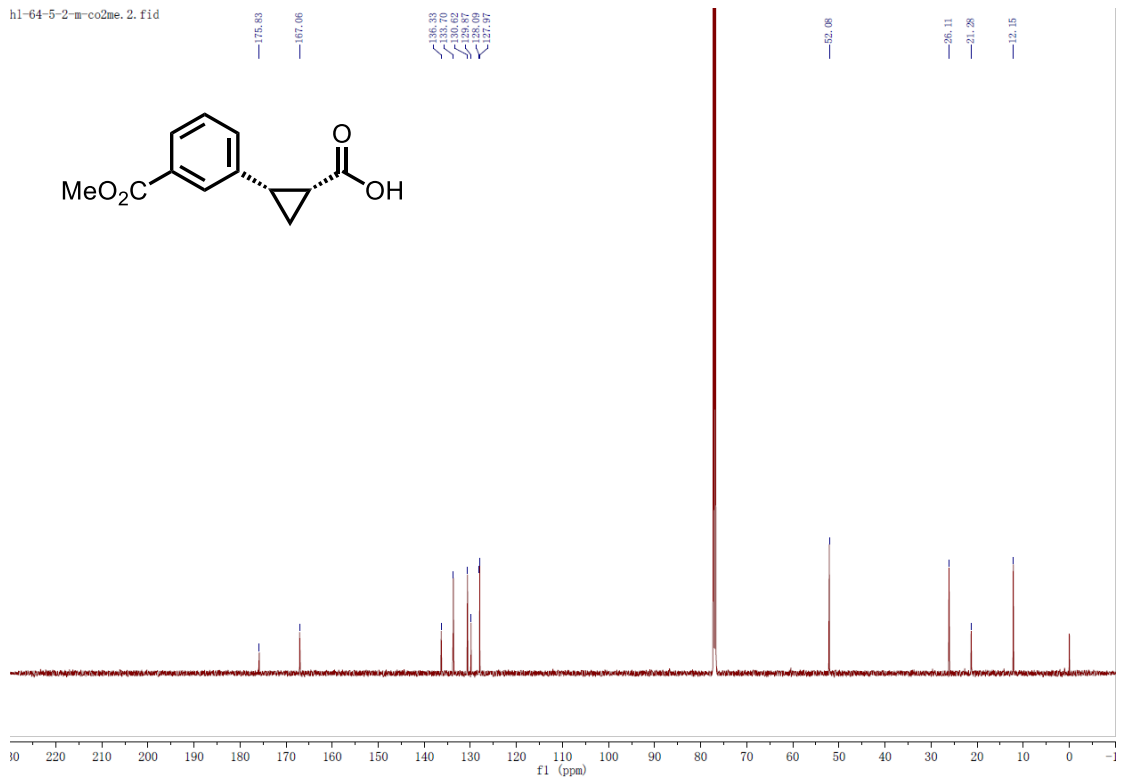

1hu-o-co2me-h.1.fid

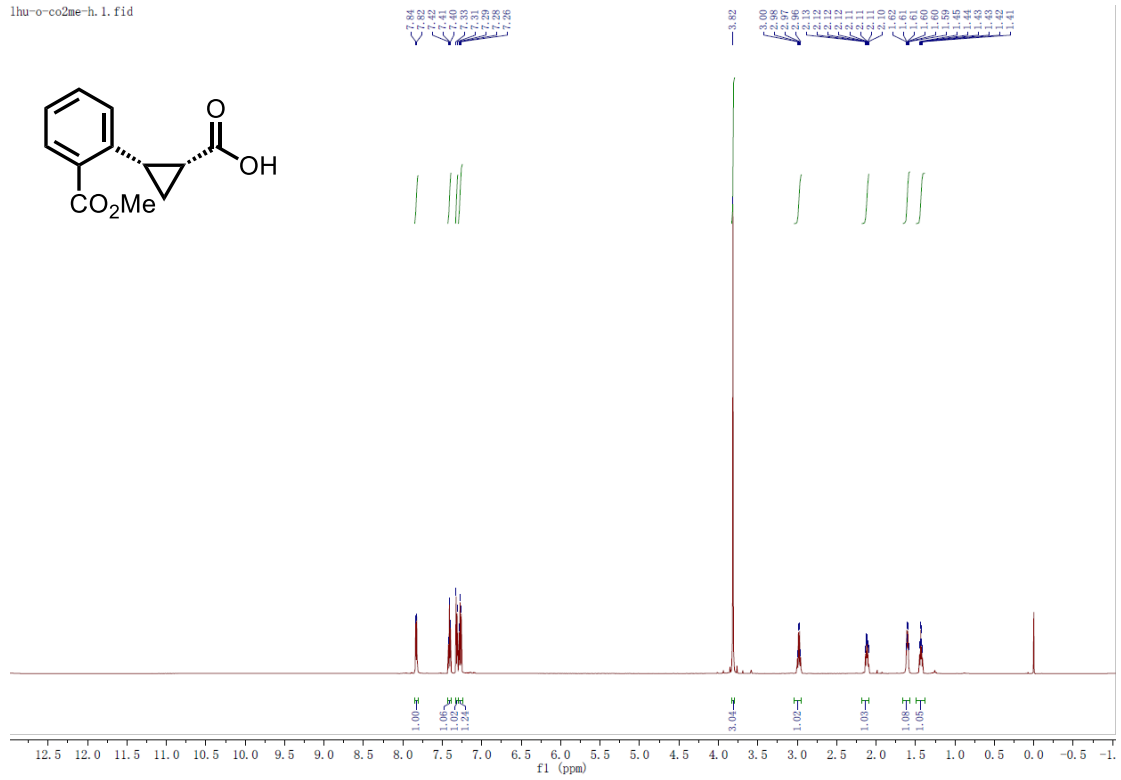

1hu-o-co2me-c.2.fid

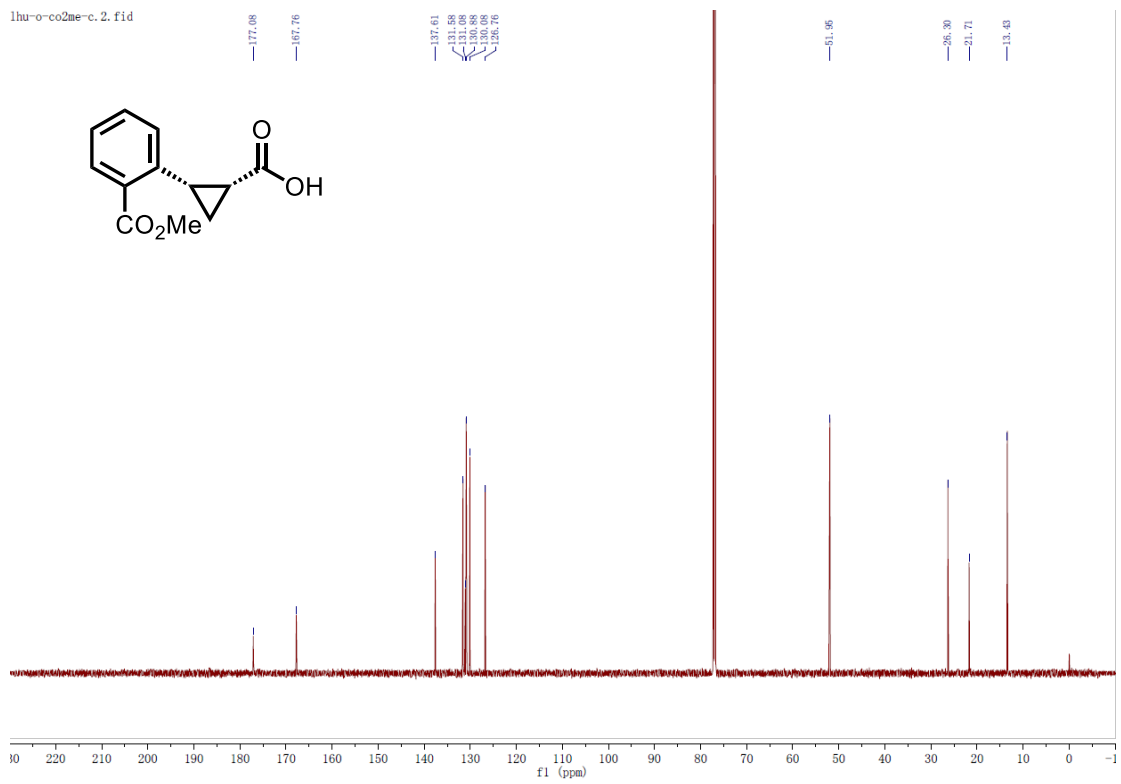

h1-64-3-2-p-h.1.fid

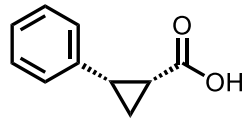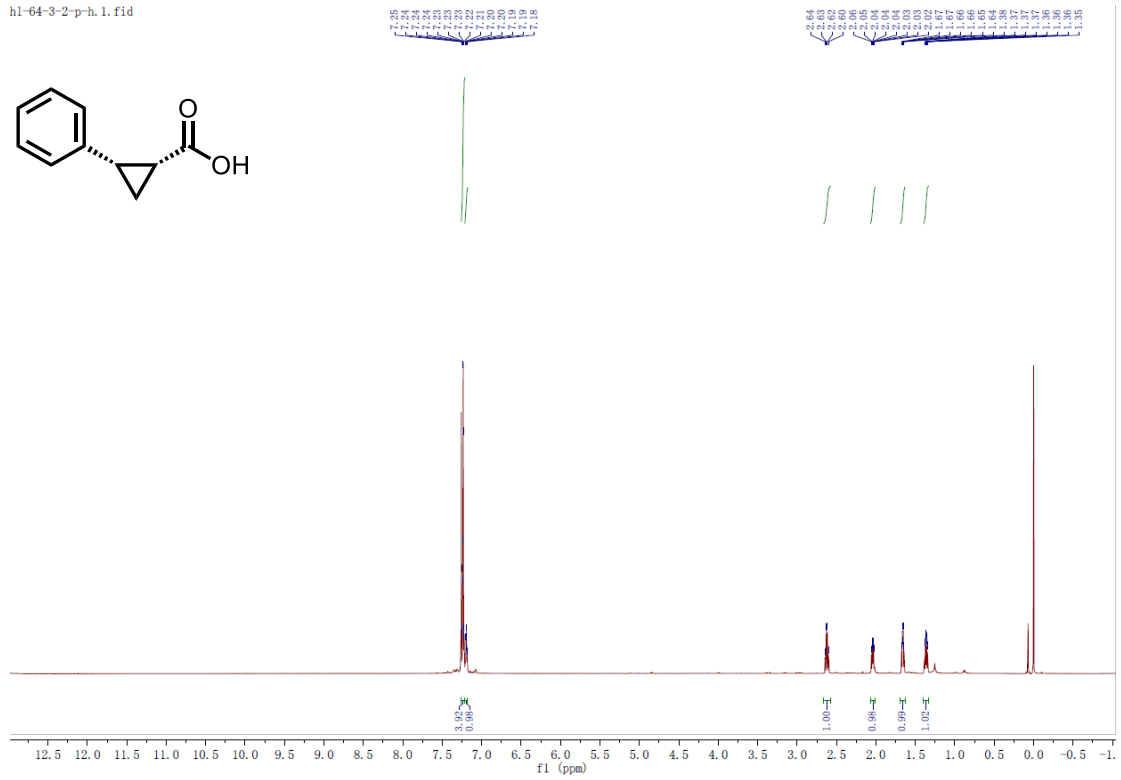

h1-64-3-2-p-h.2.fid

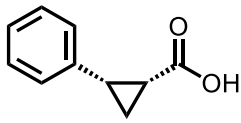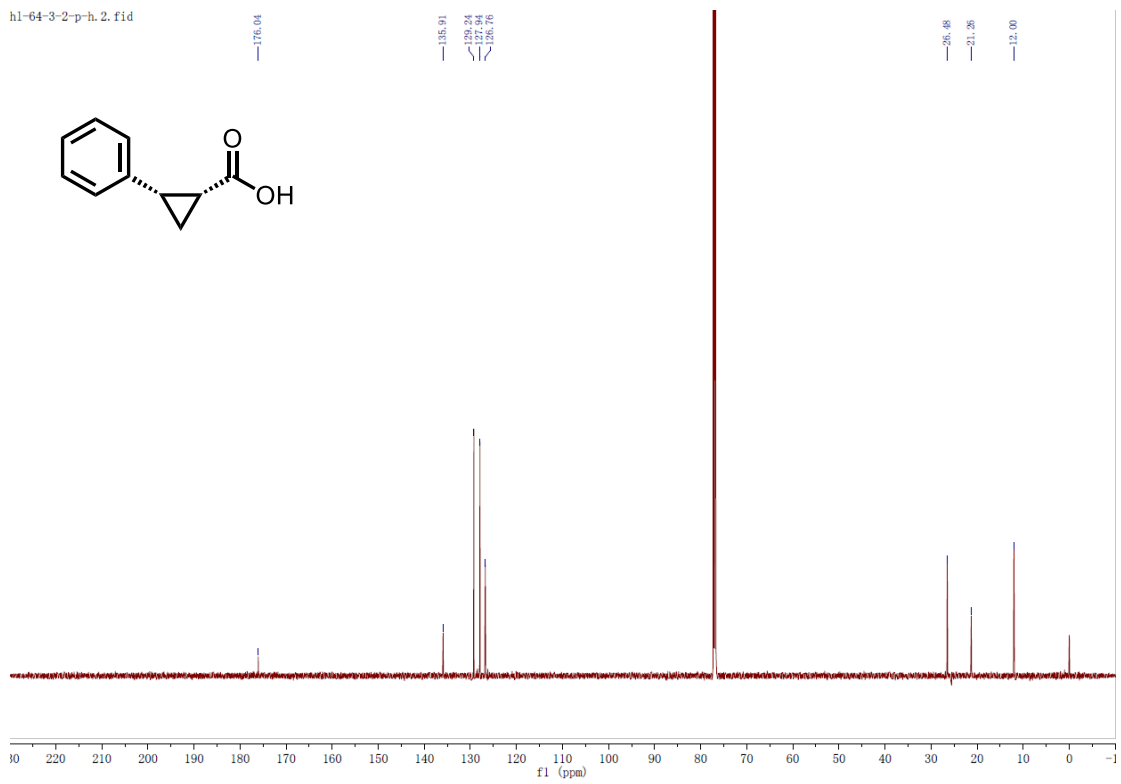

1hu-272-3,5-co2me-h. 1. fid

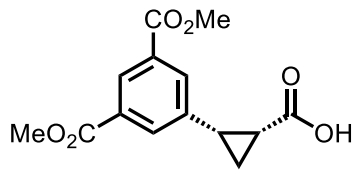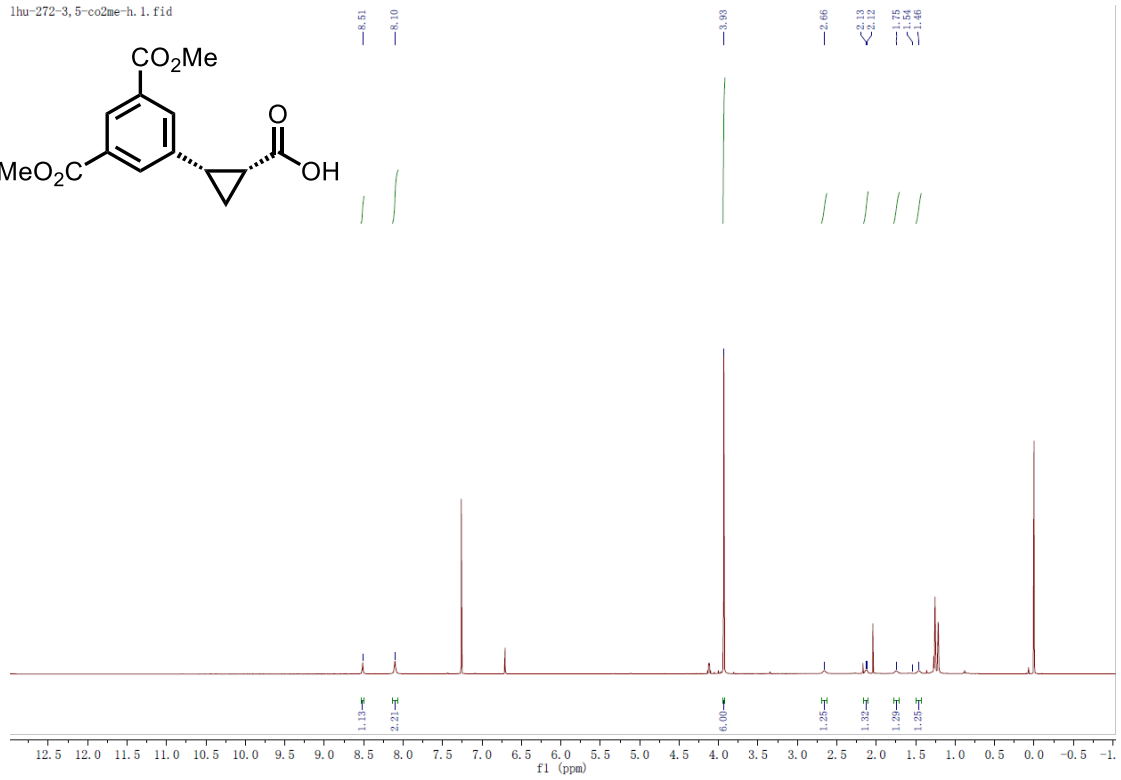

1hu-272-3,5-co2me-c. 1. fid

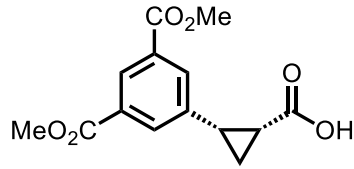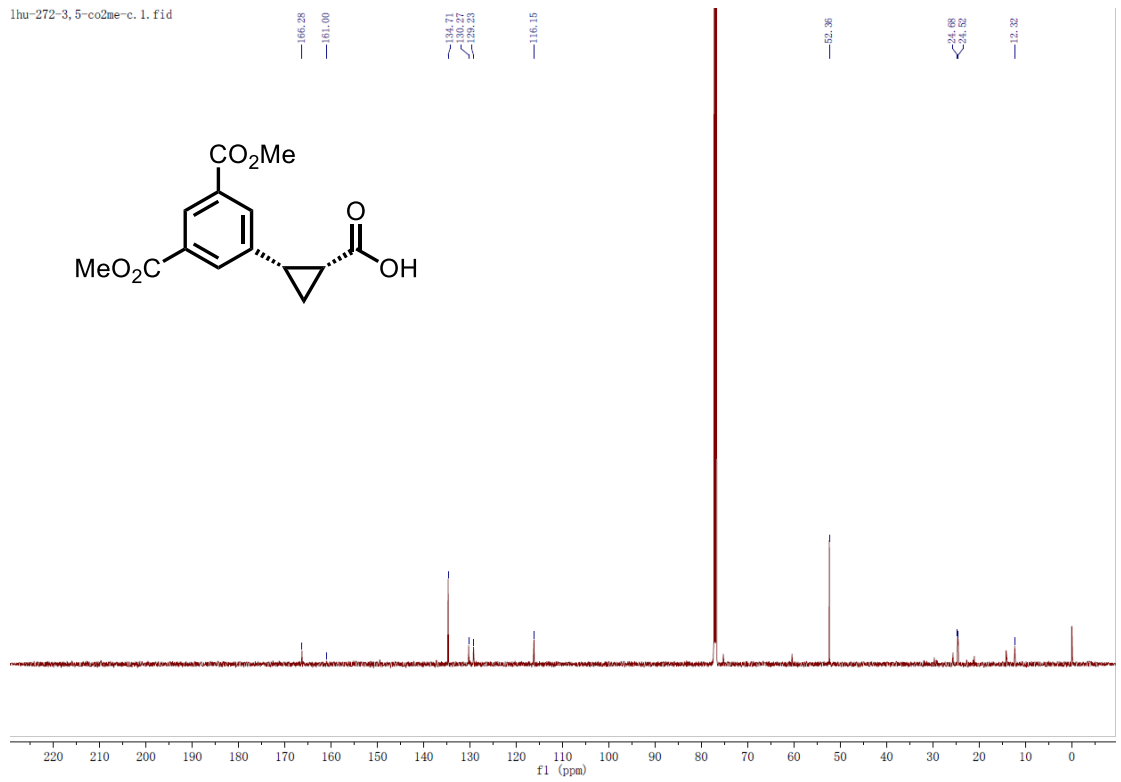

lhu-262-1-boen-h-2.1.fid

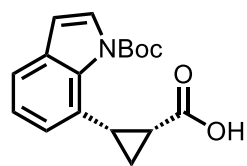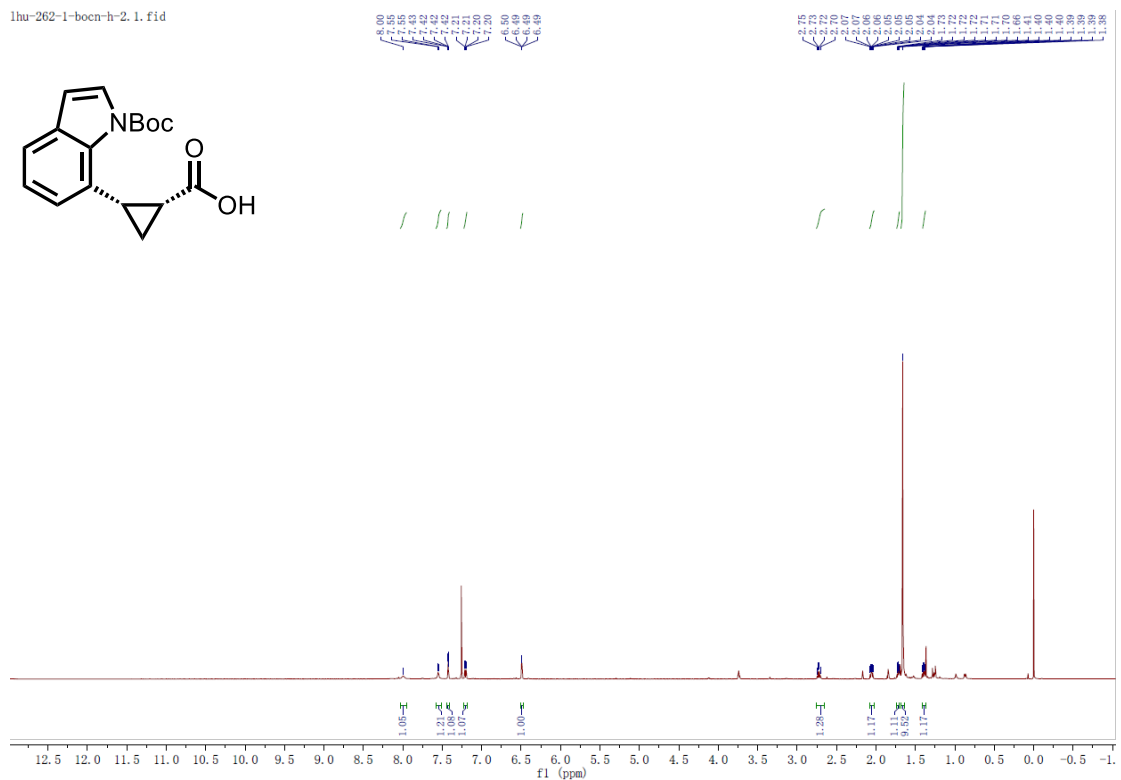

lhu-262-1-boen-c-2.1.fid

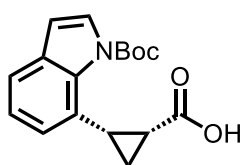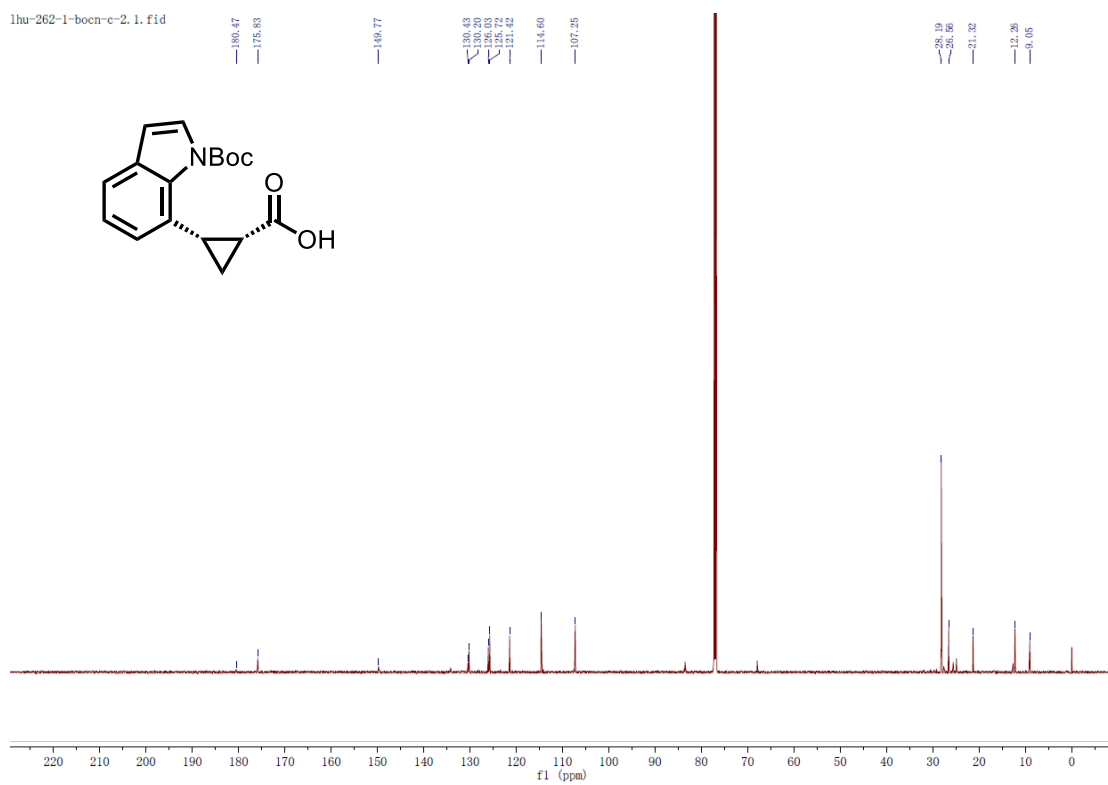

lhu-500-6-h.1.fid

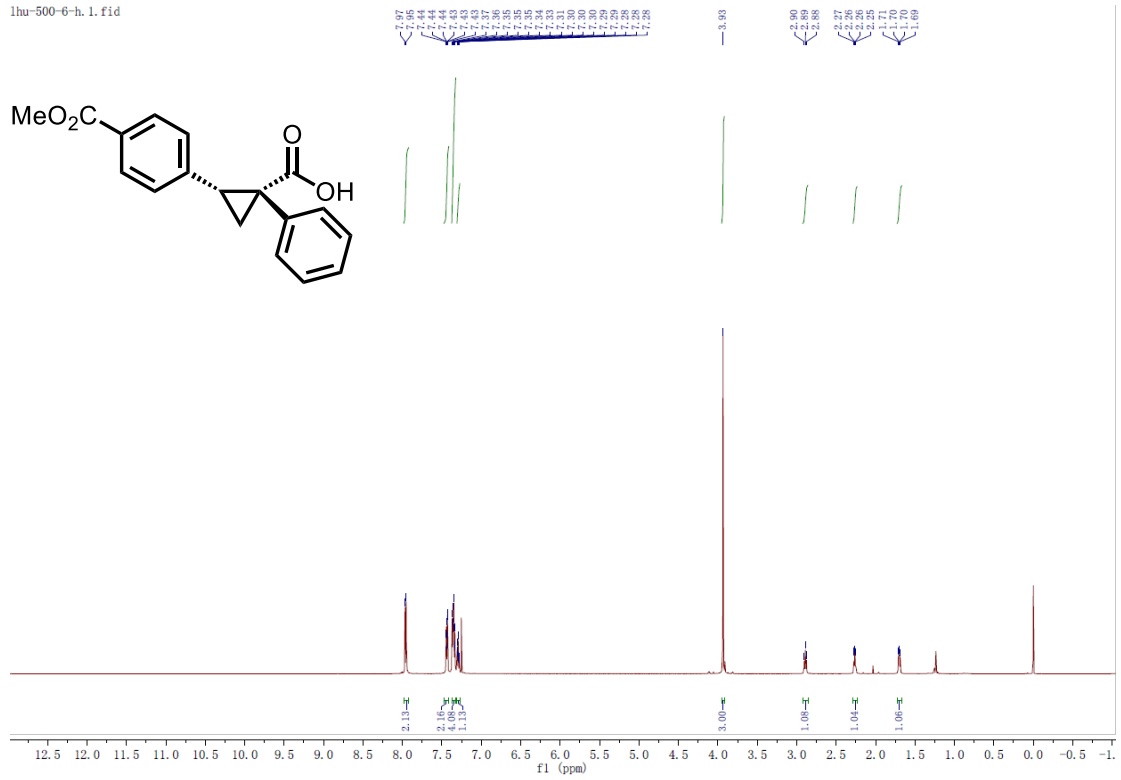

lhu-500-6-c.1.fid

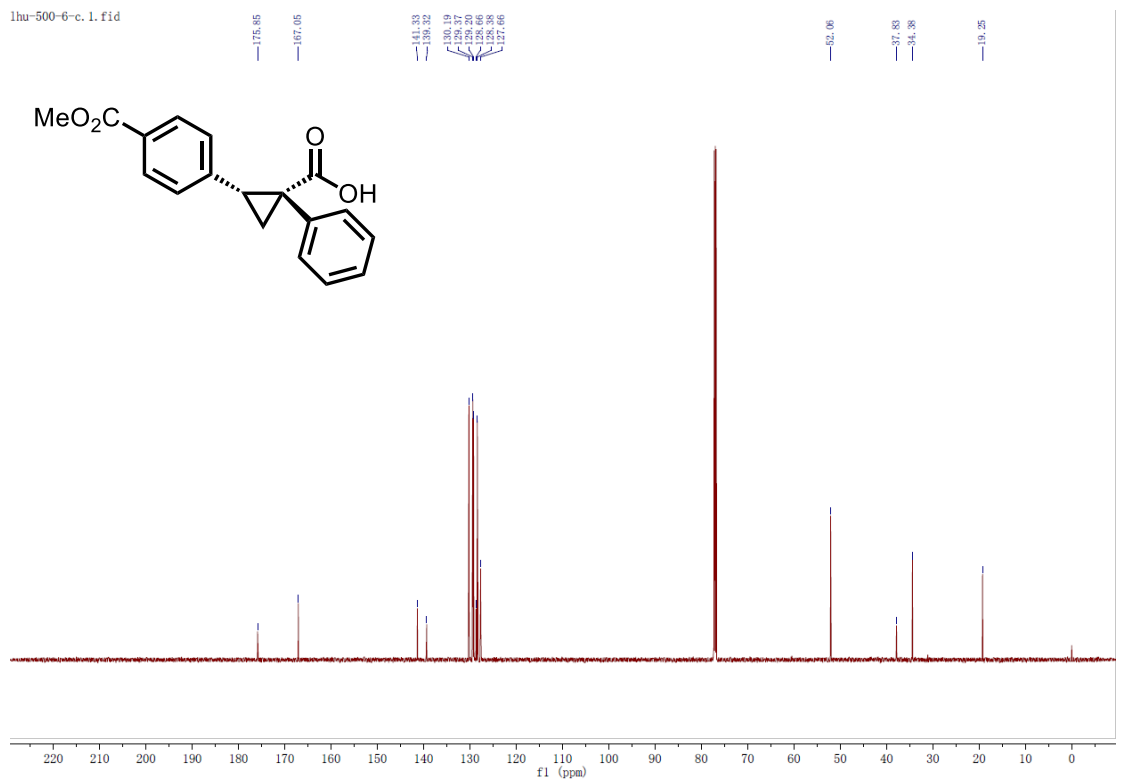

lhu-500-7-h. 1.fid

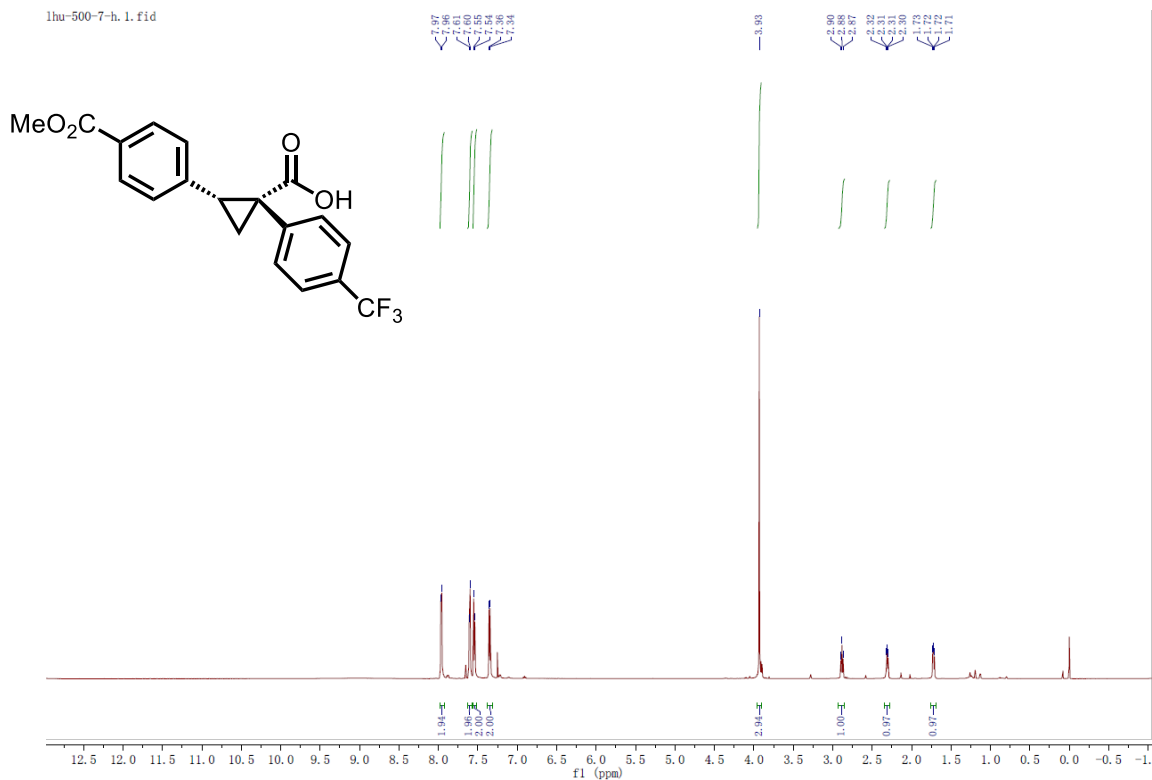

lhu-500-7-c. 1.fid

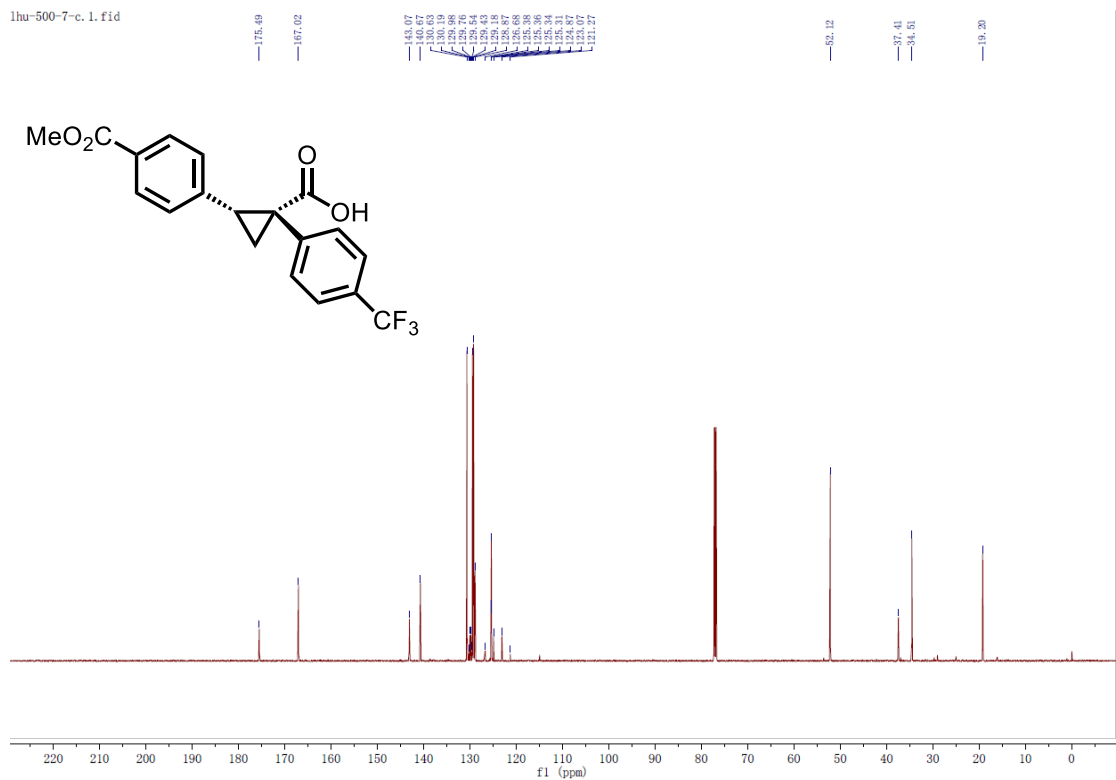



lhu-500-7-f. 1.fid

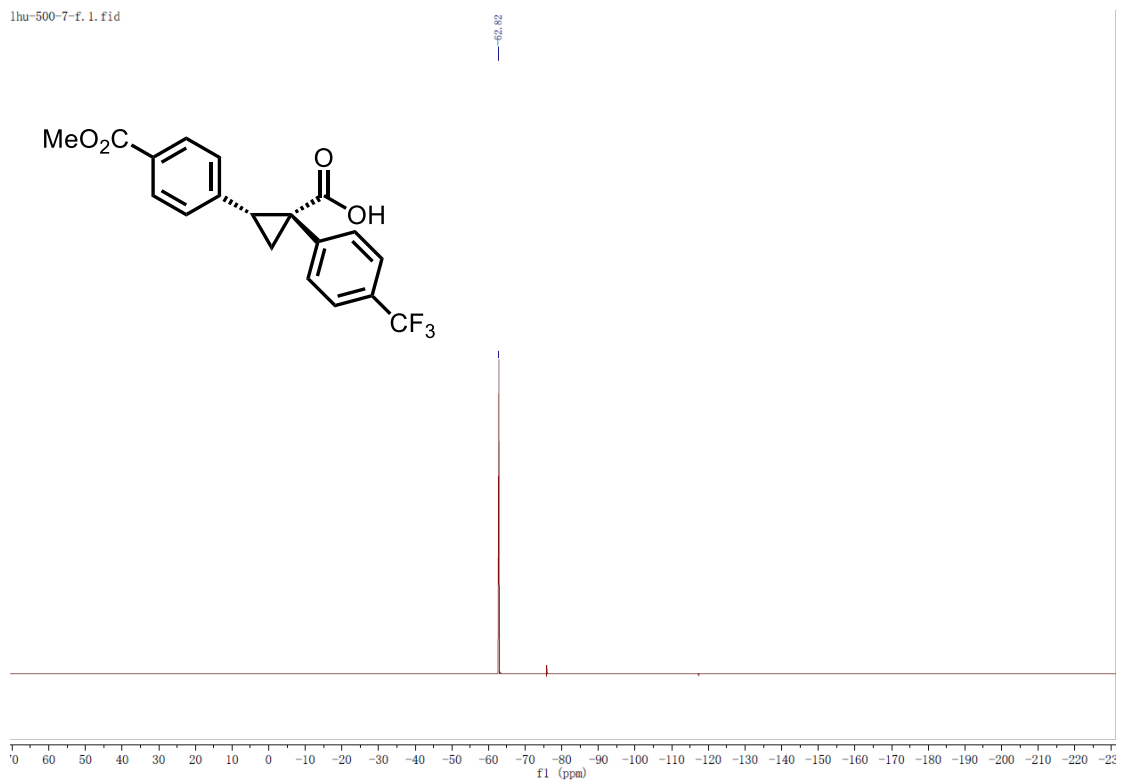

lhu-500-11-h. 1.fid

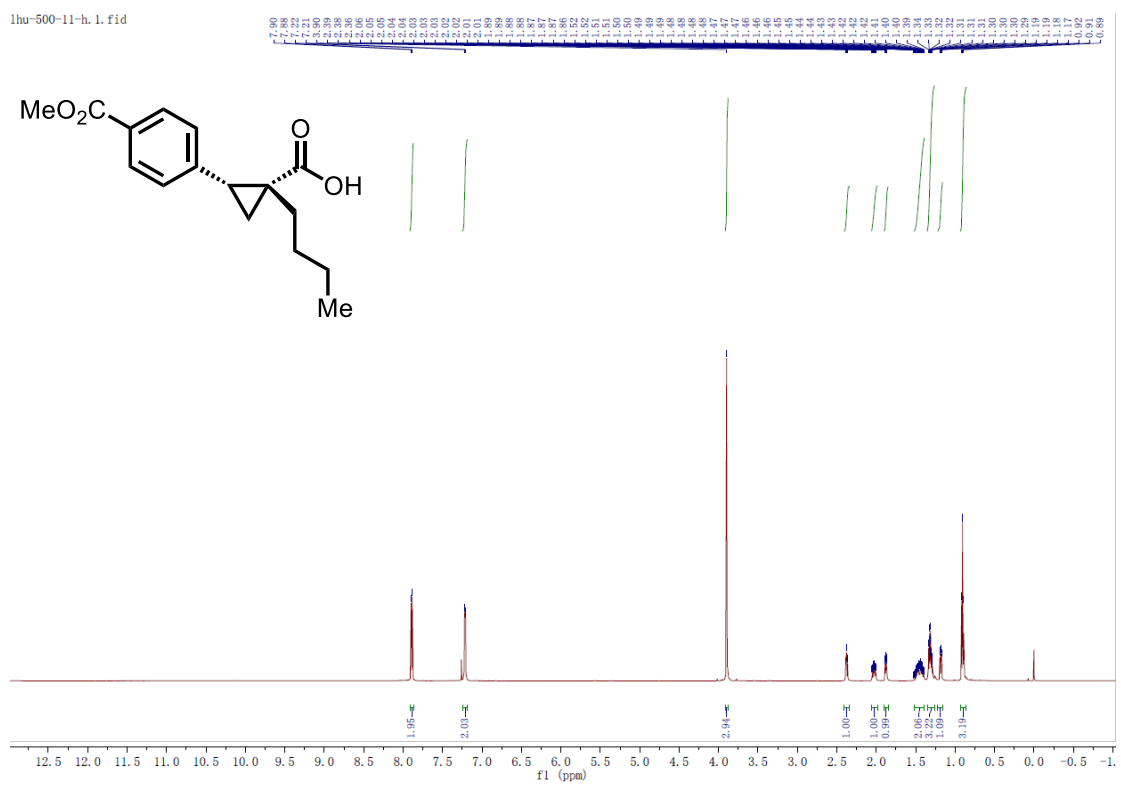

lhu-500-11-c.1.fid

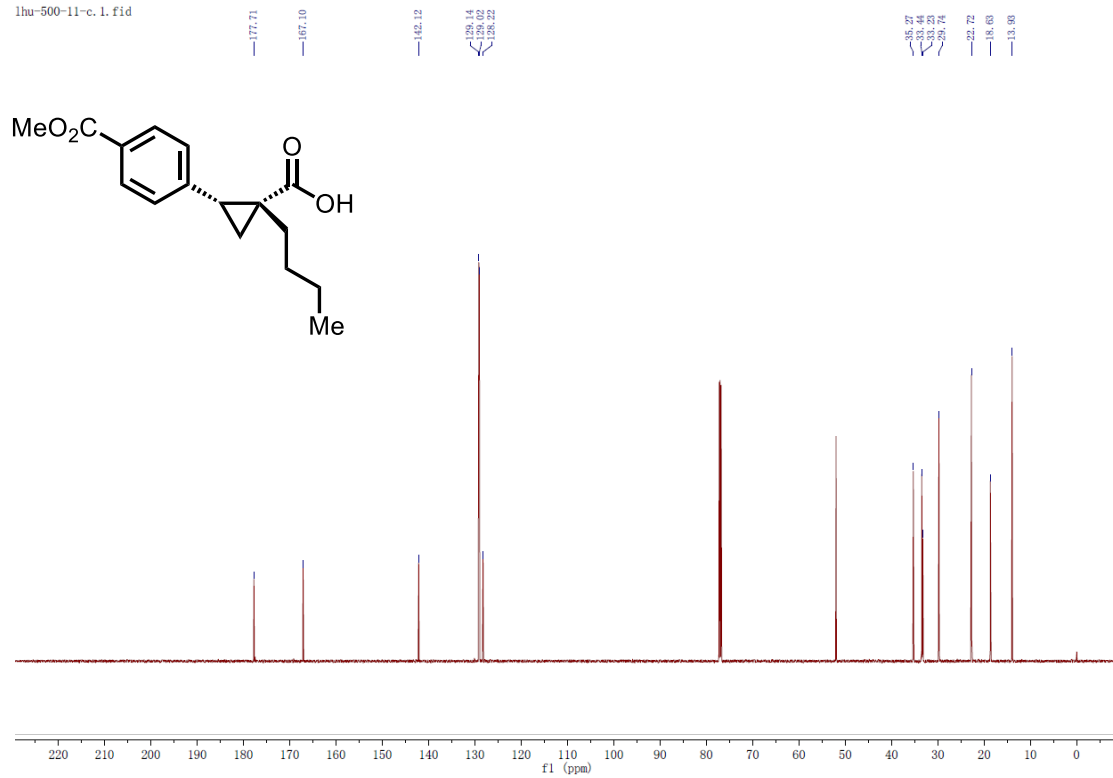

lhu-500-9-h.1.fid

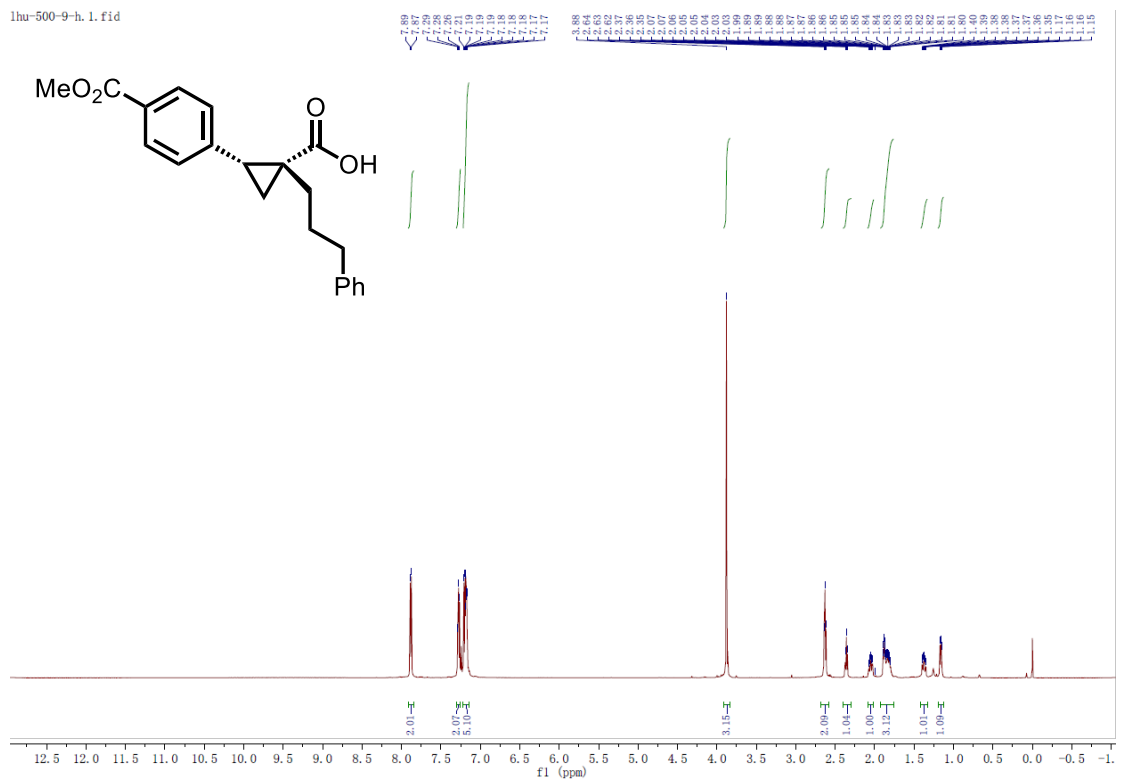

lhu-500-9-c.1.fid

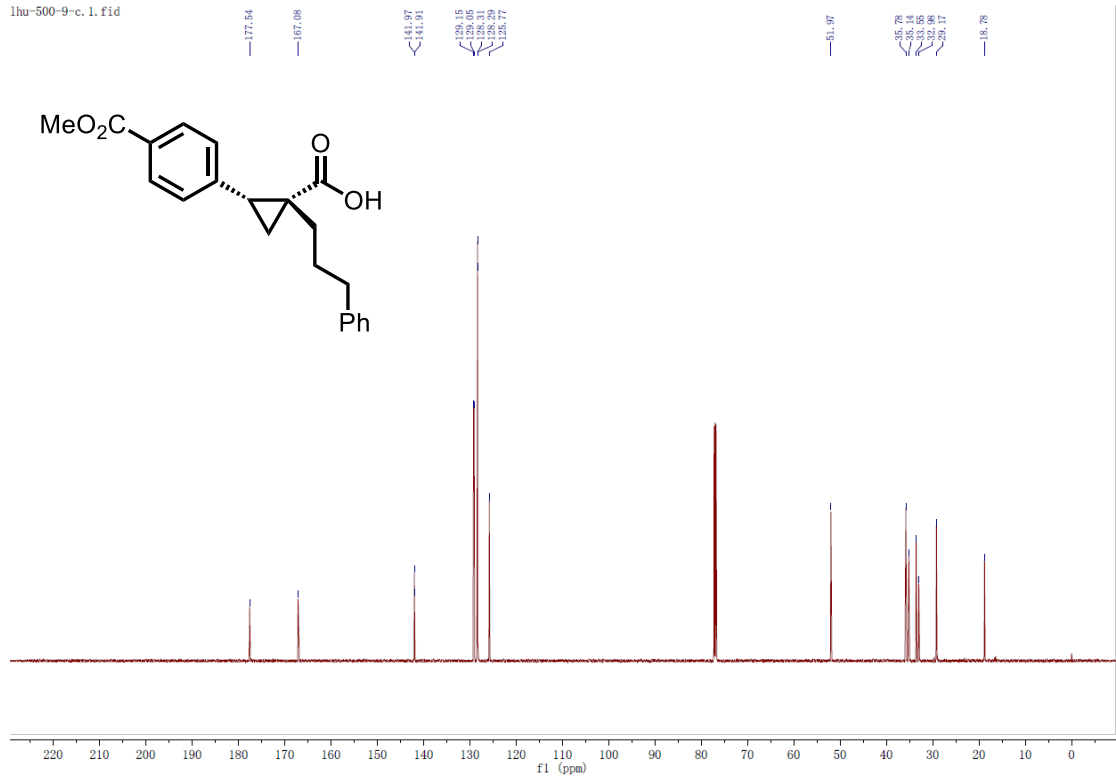

lhu-500-4-h.1.fid

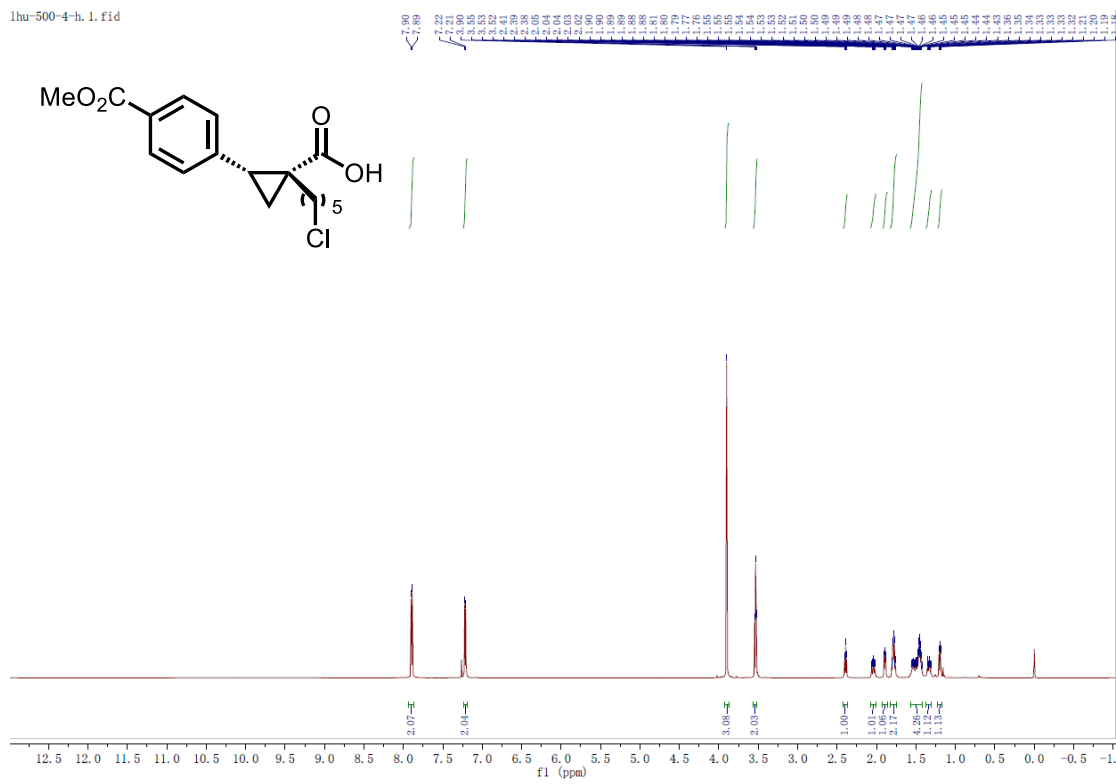

lhu-500-4-c.1.fid

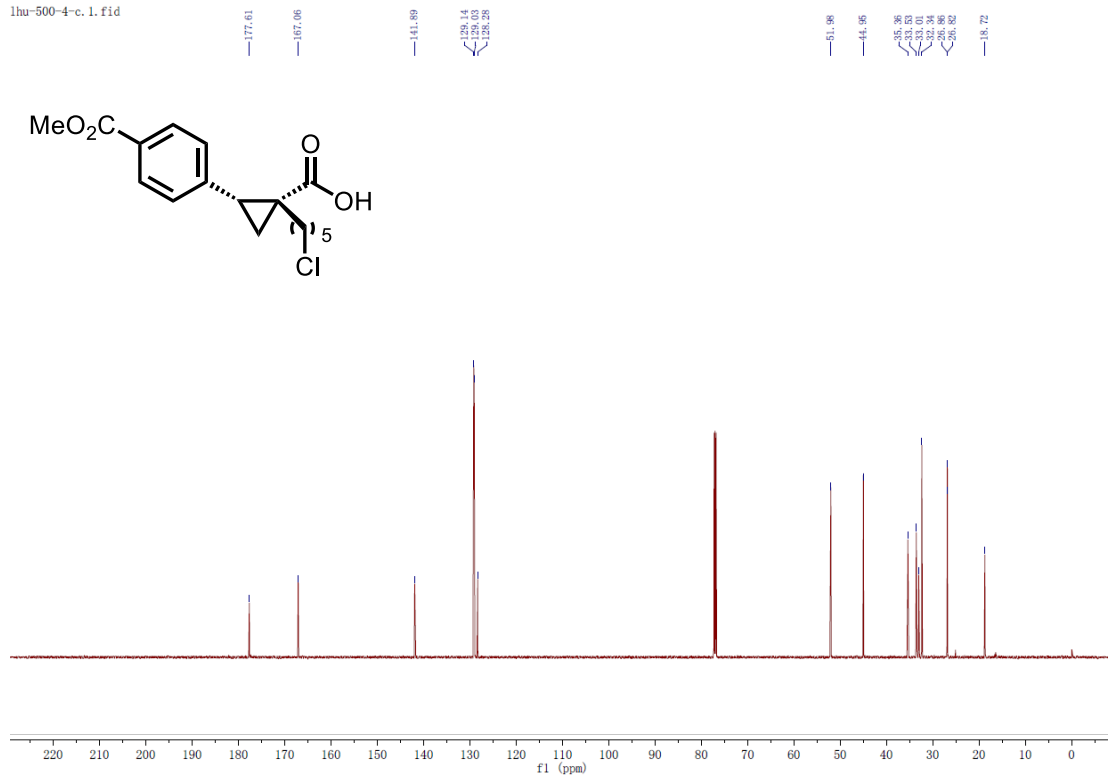

lhu-500-5-h.1.fid

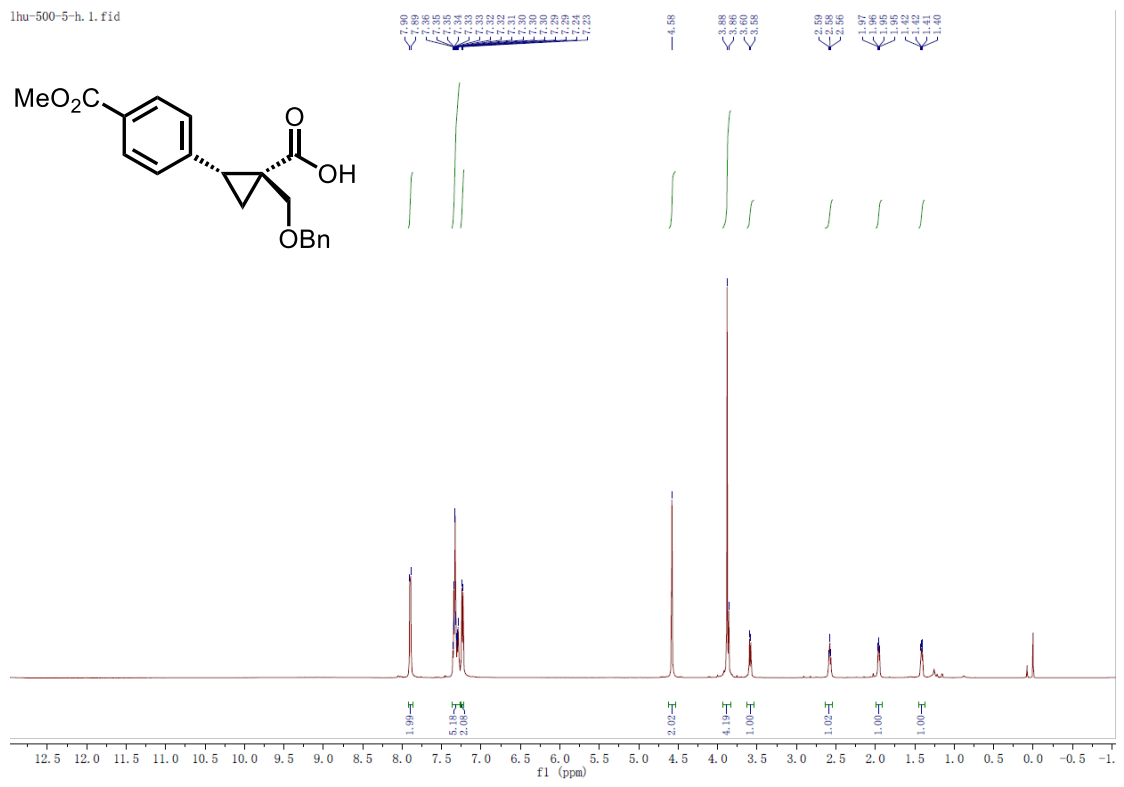

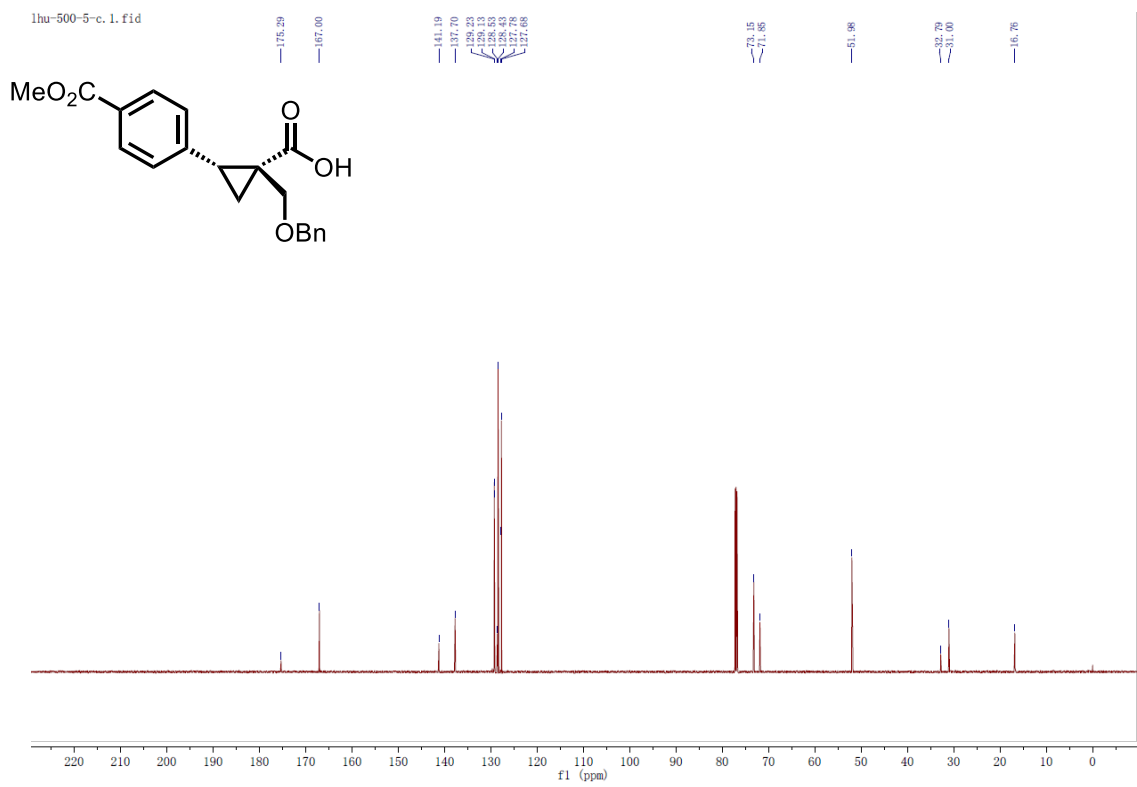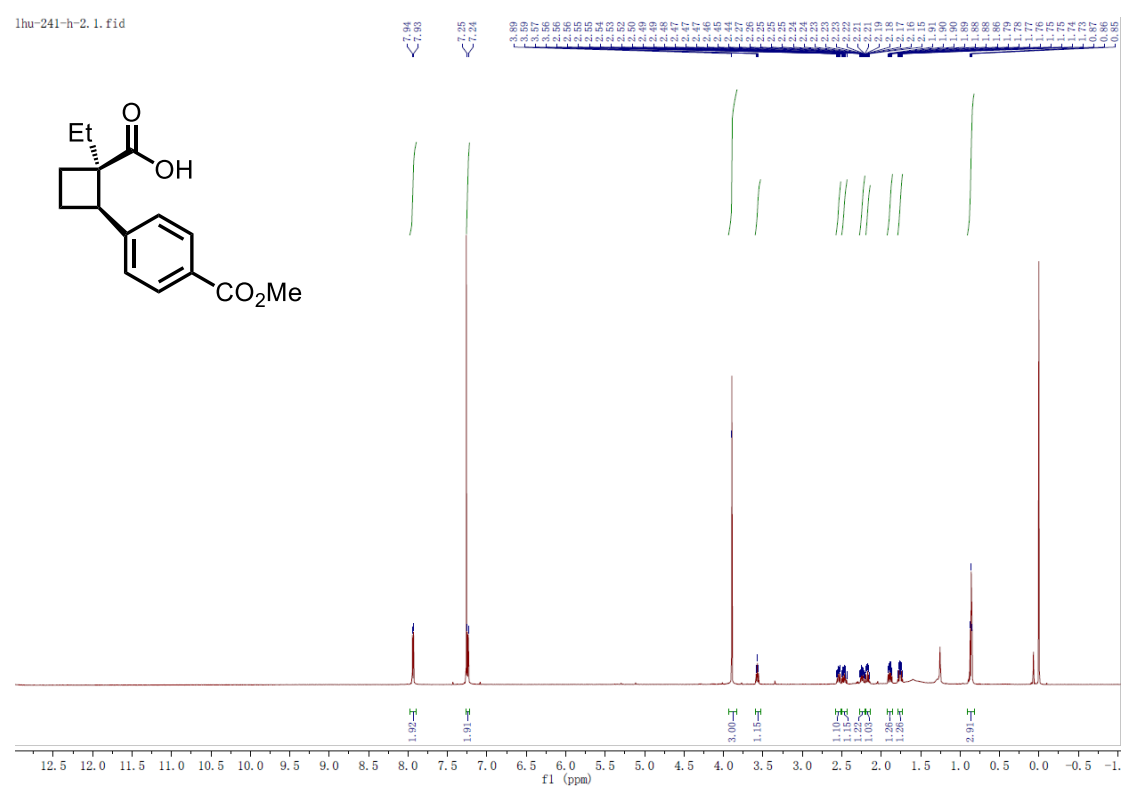



lhu-324-5-c. 6. fid

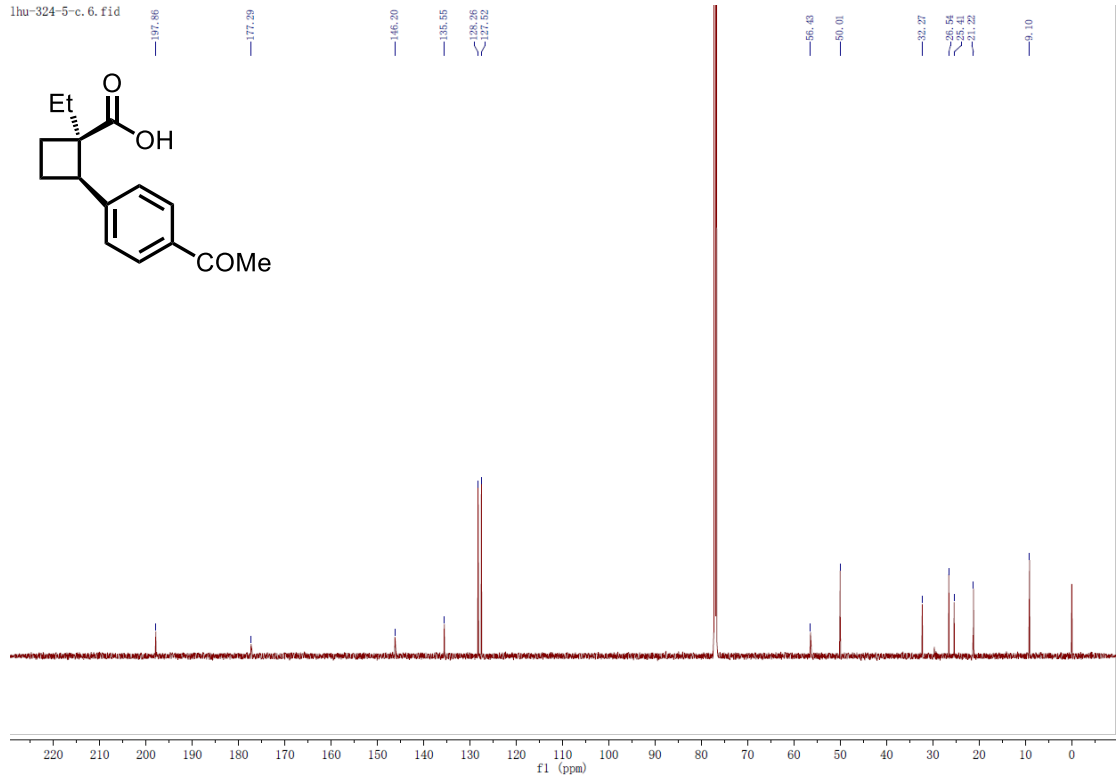

lhu-324-2-h. 1. fid

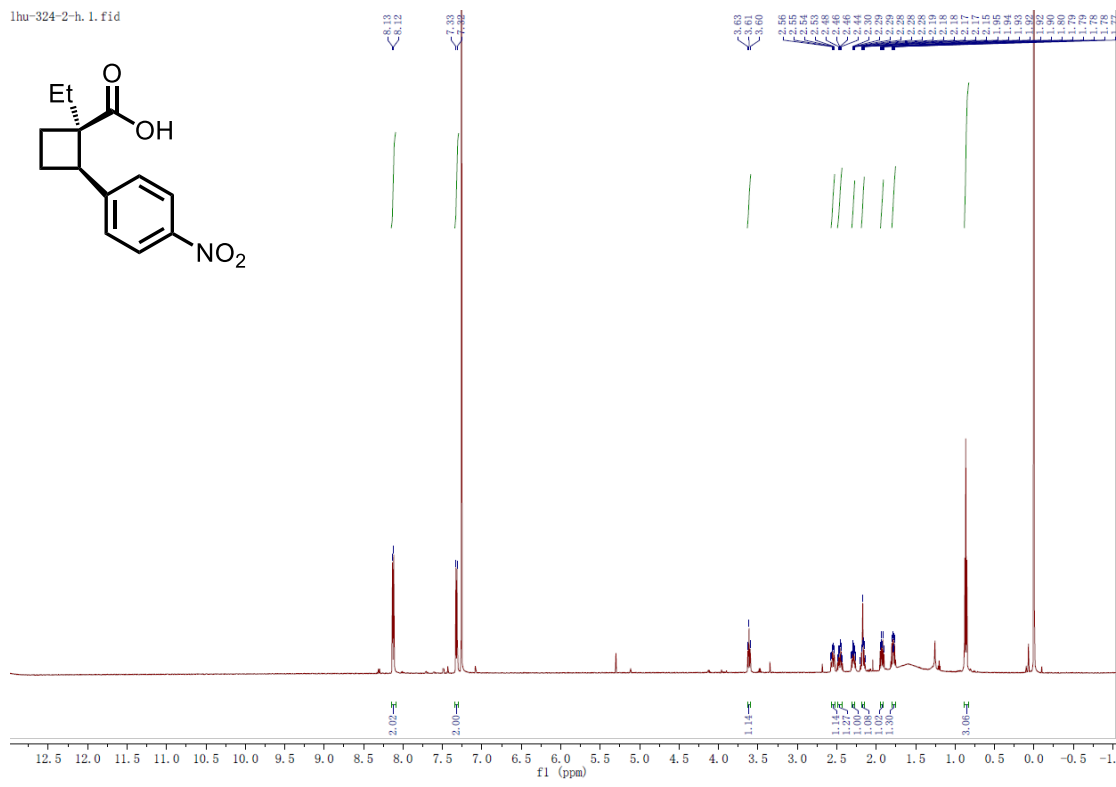

lhu-324-2-c. 2. fid

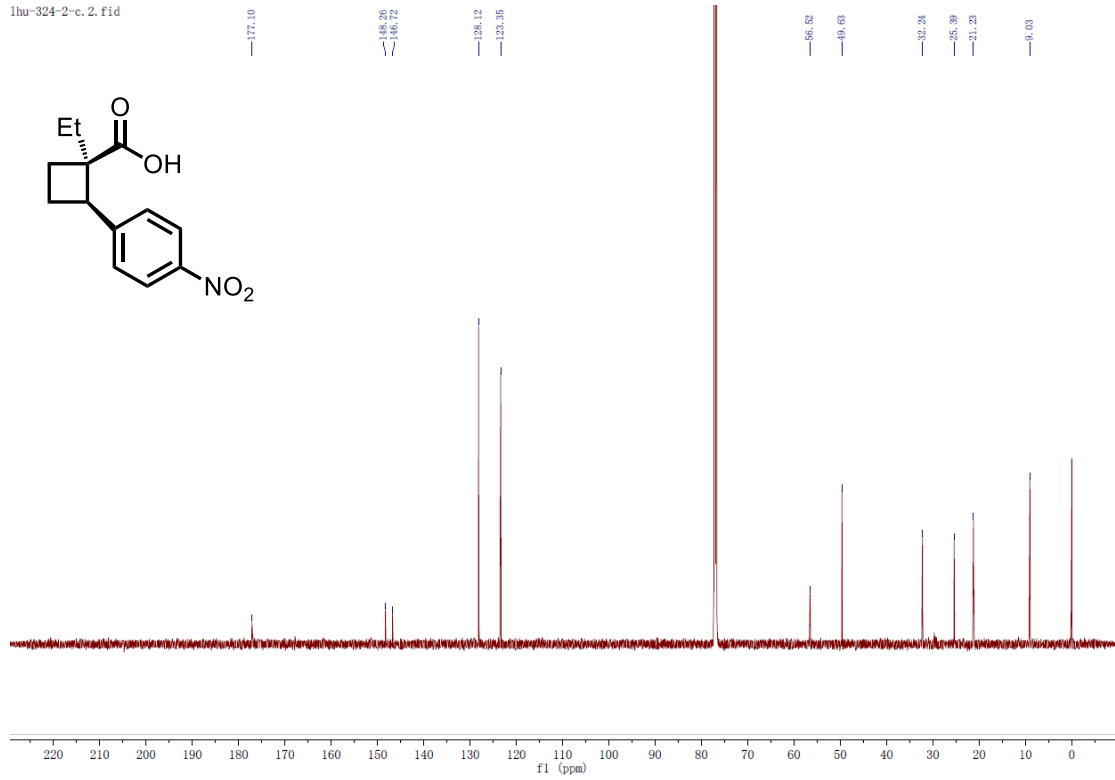

lhu-327-3-h. 3. fid

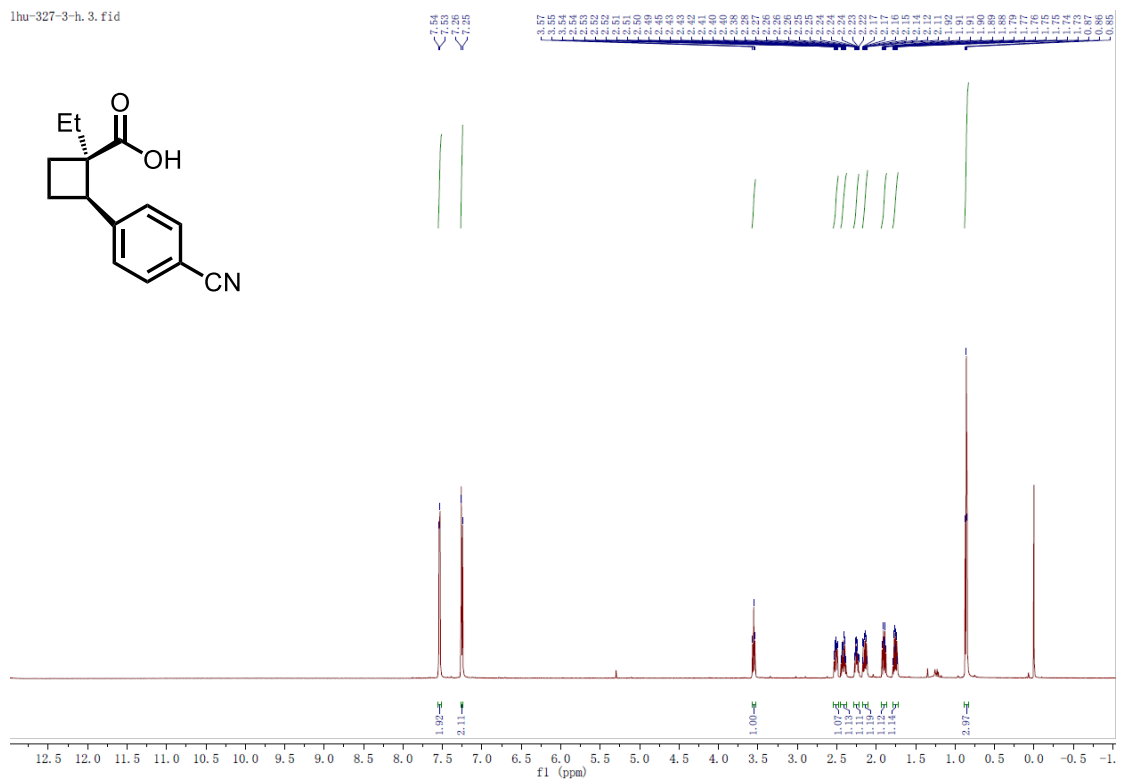





lhu-372-12-c.13.fid

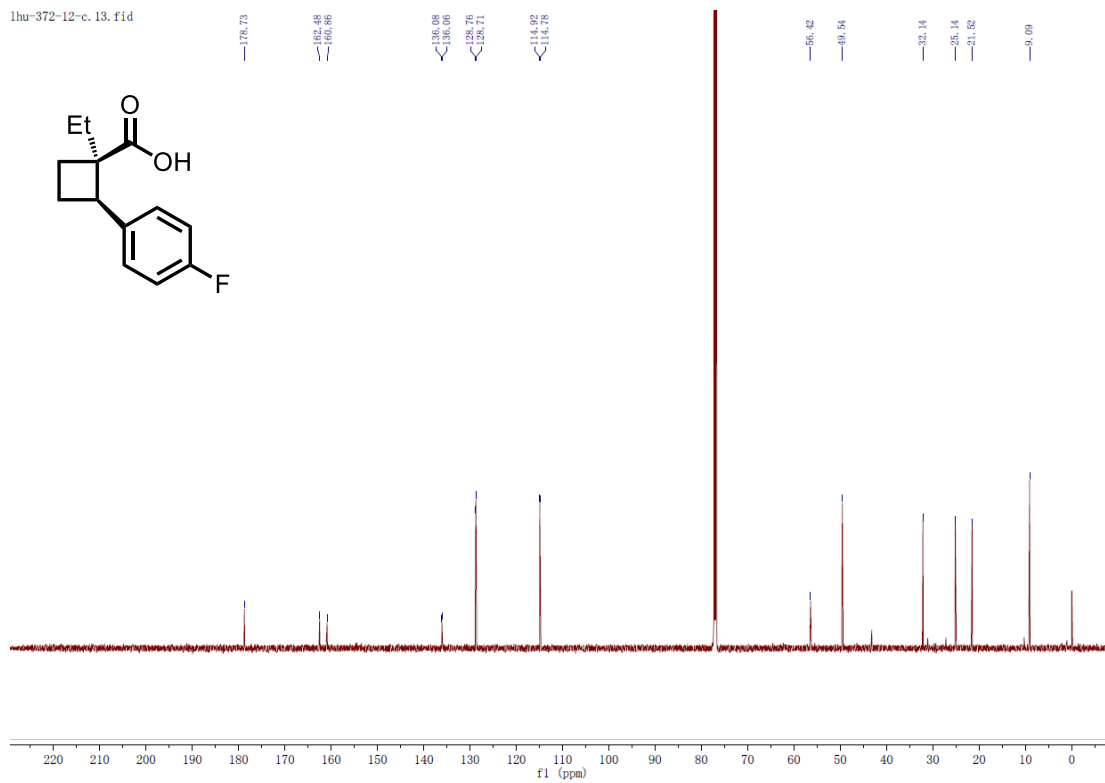

lhu-327-12-f.9.fid

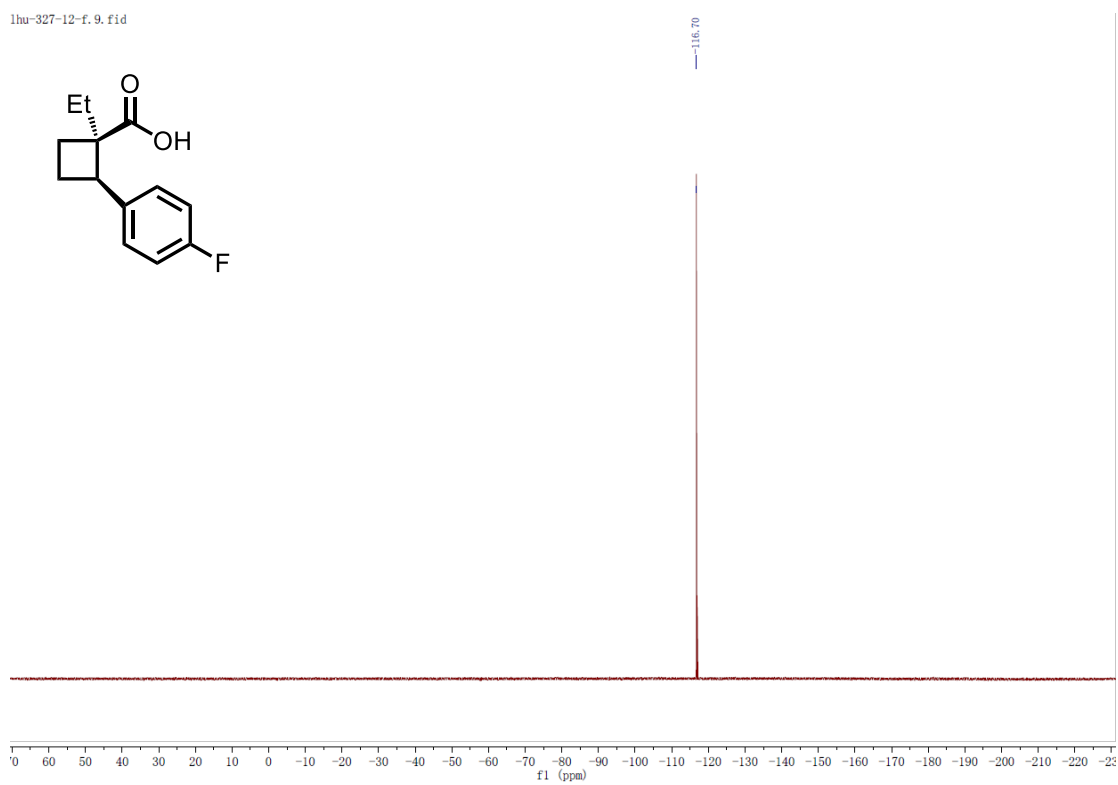



lhu-324-3-h. 3. fid

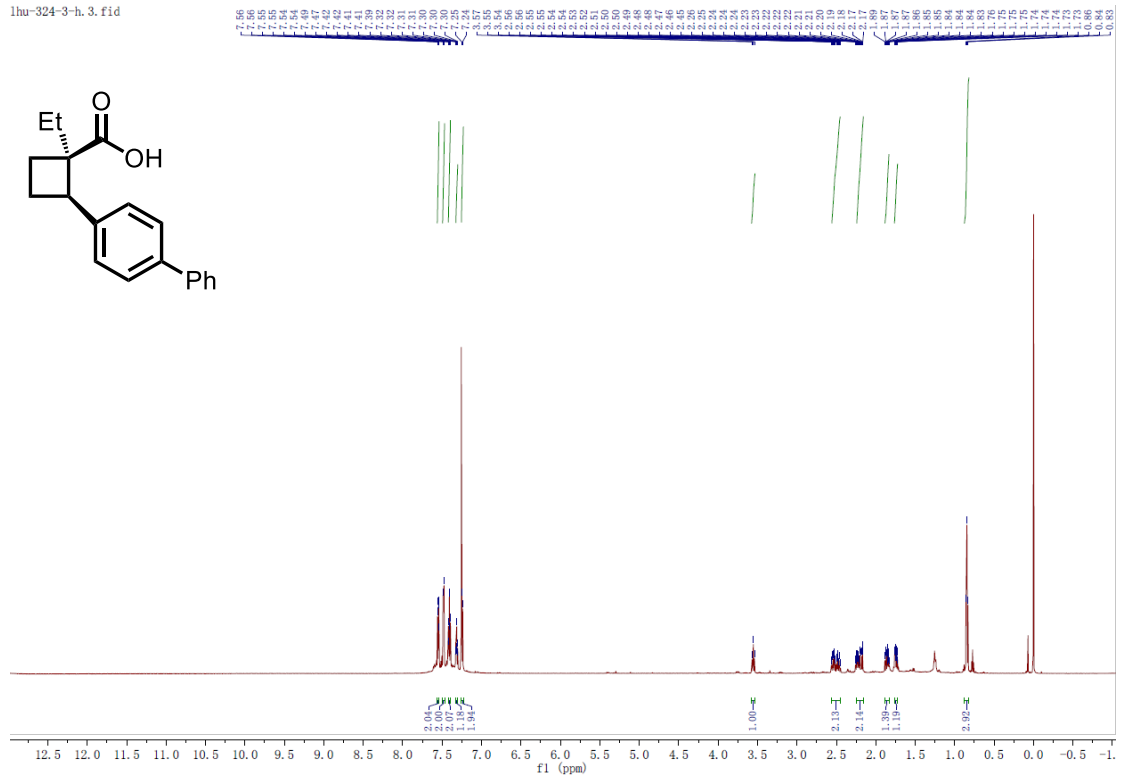

lhu-324-3-c. 4. fid

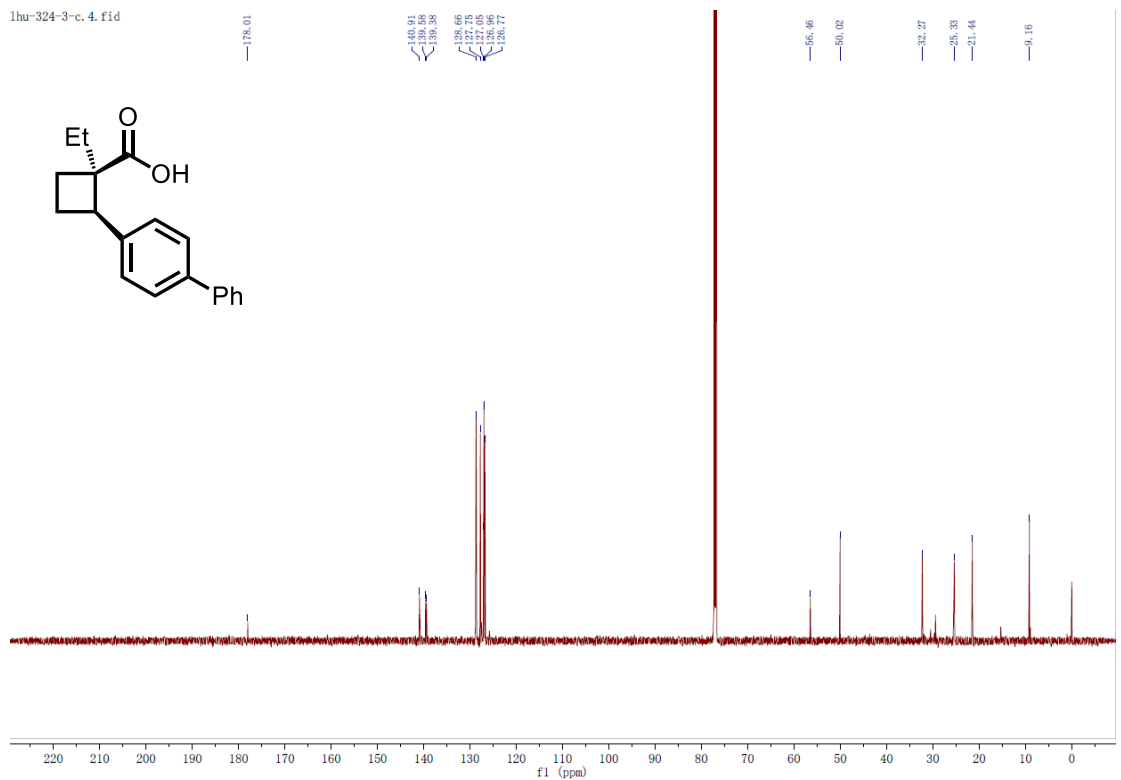

lhu-327-8-h. 14. fid

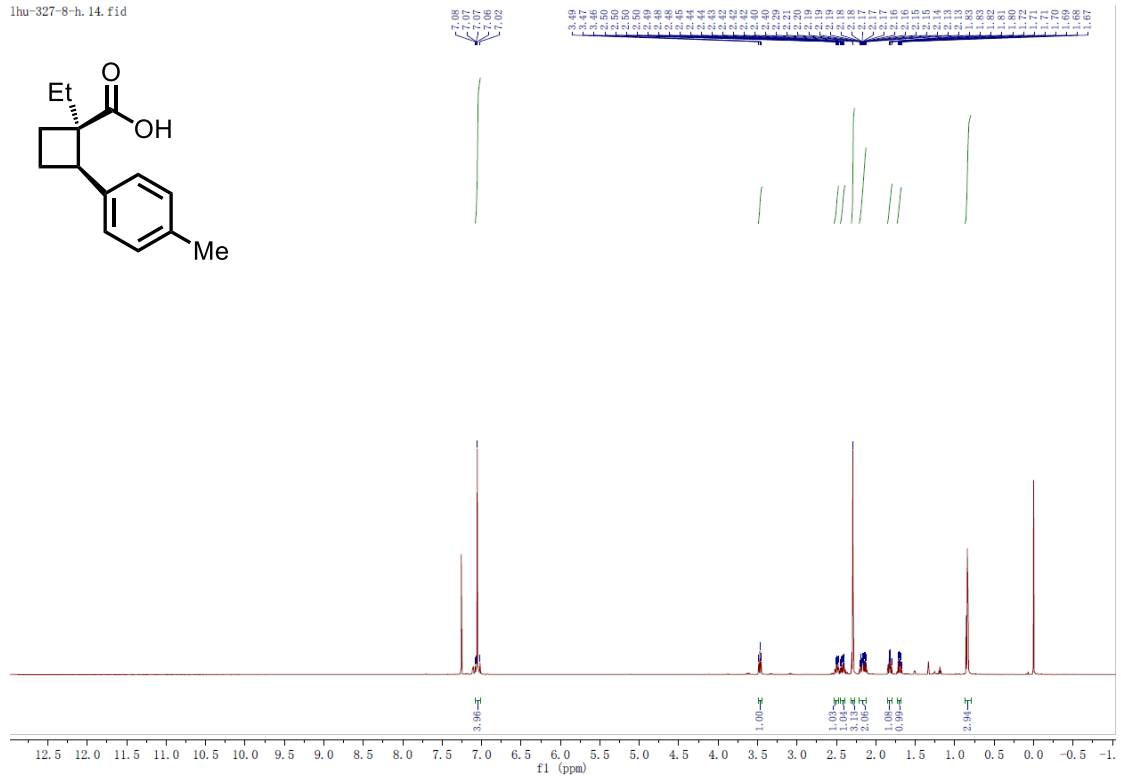

lhu-327-8-c. 15. fid

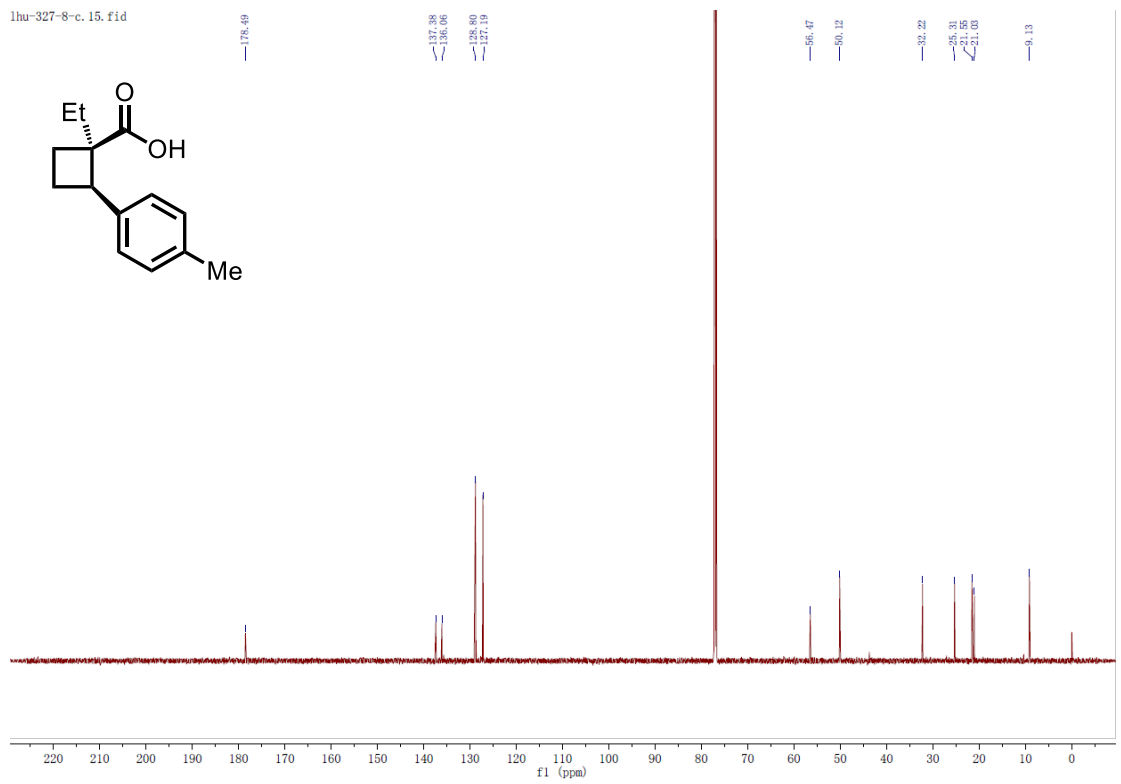



lhu-327-9-f. 7. fid

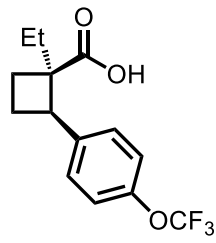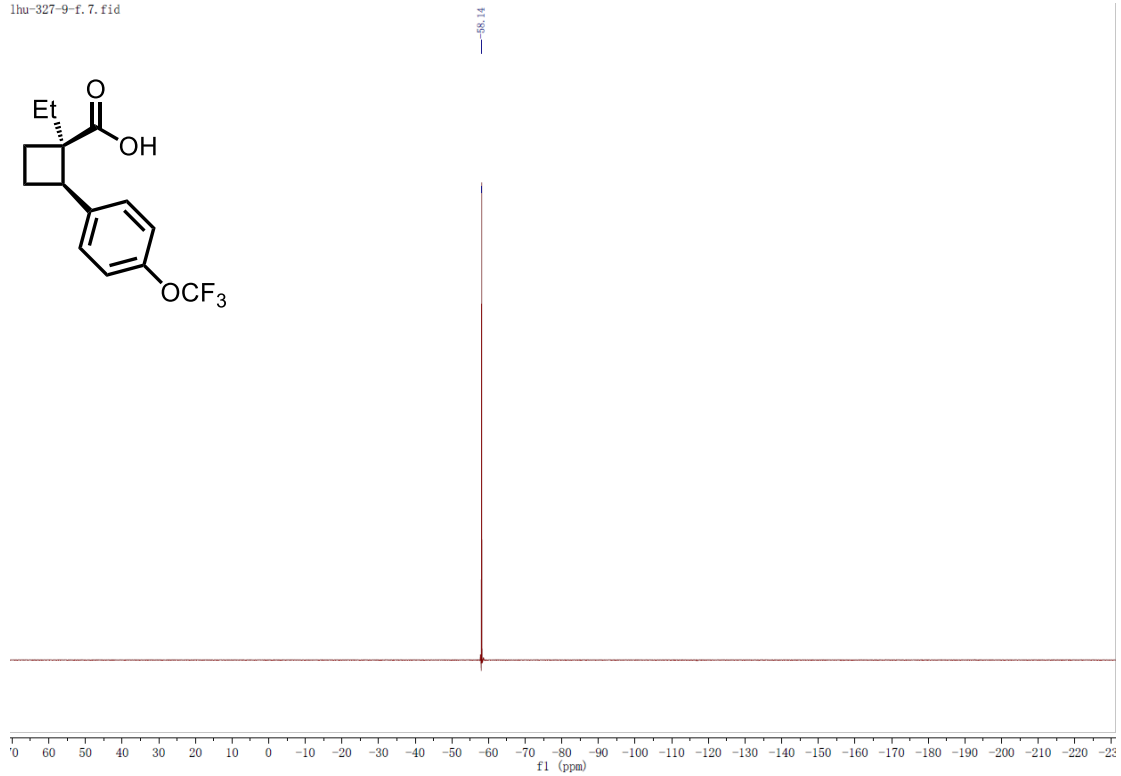

lhu-327-5-h. 8. fid

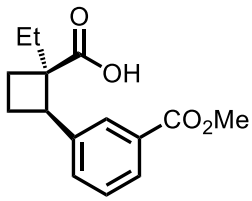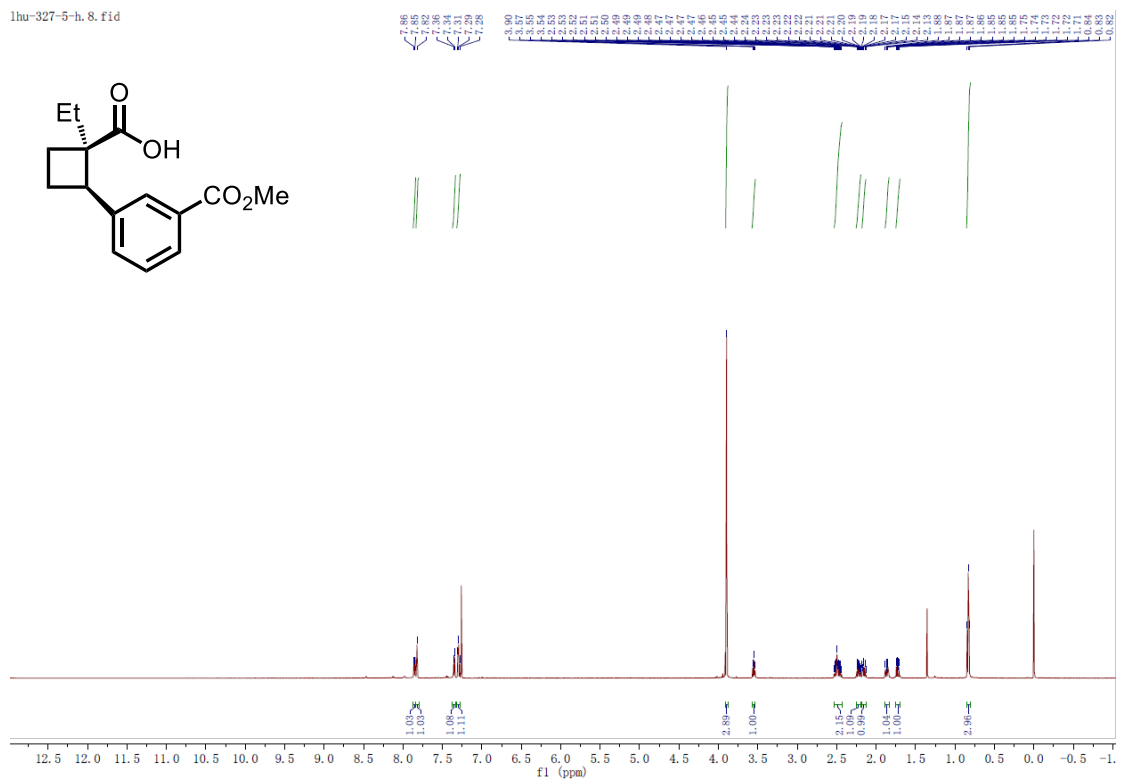

lhu-327-5-c.9.fid

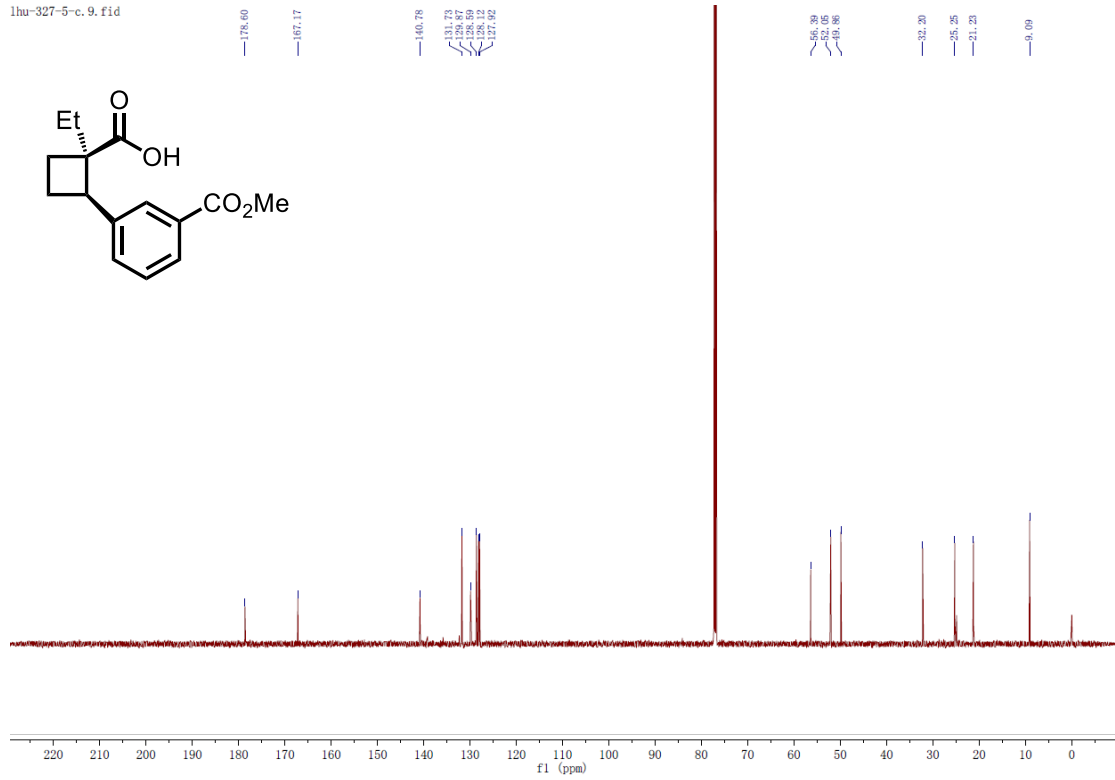

lhu-327-4-h-2.3.fid

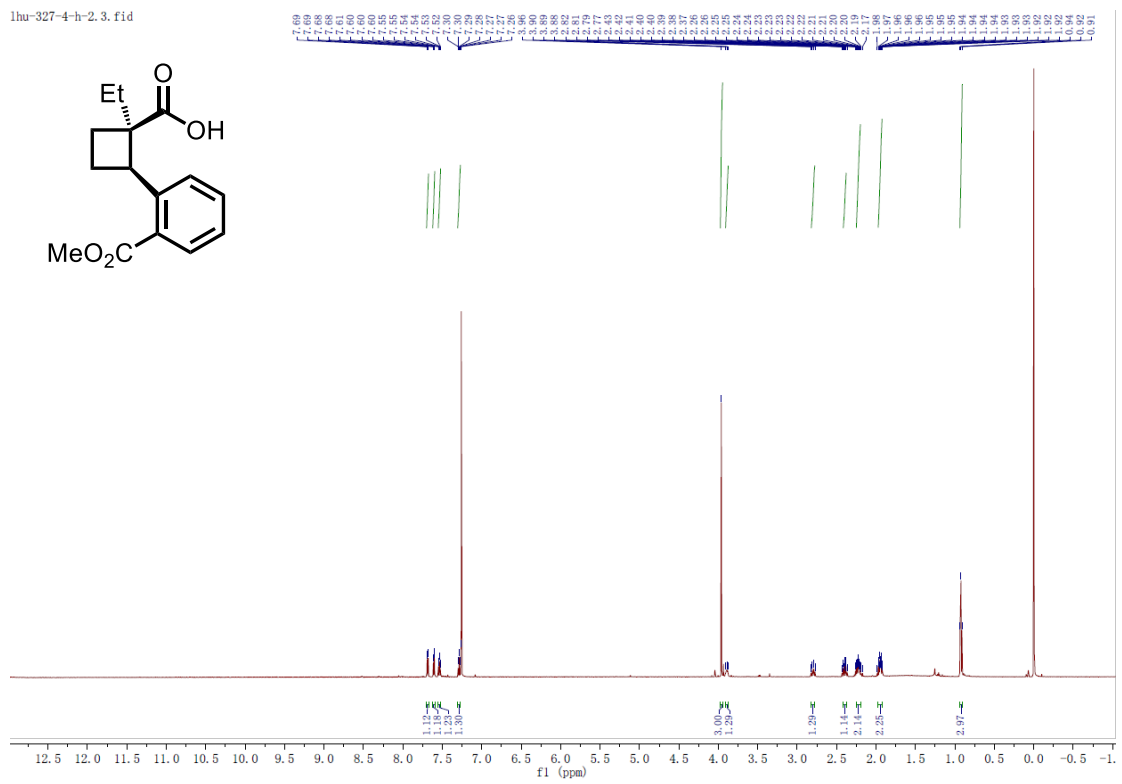





lhu-327-1-c-2.2.fid

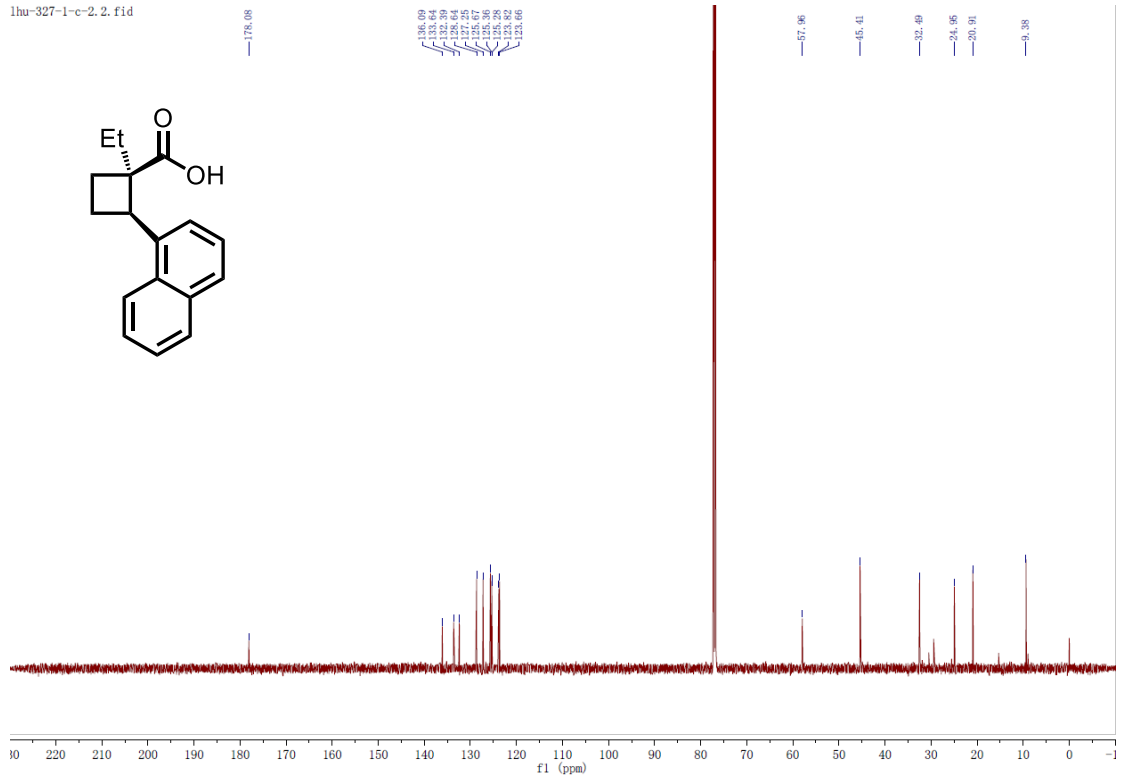

lhu-327-2-h.7.fid

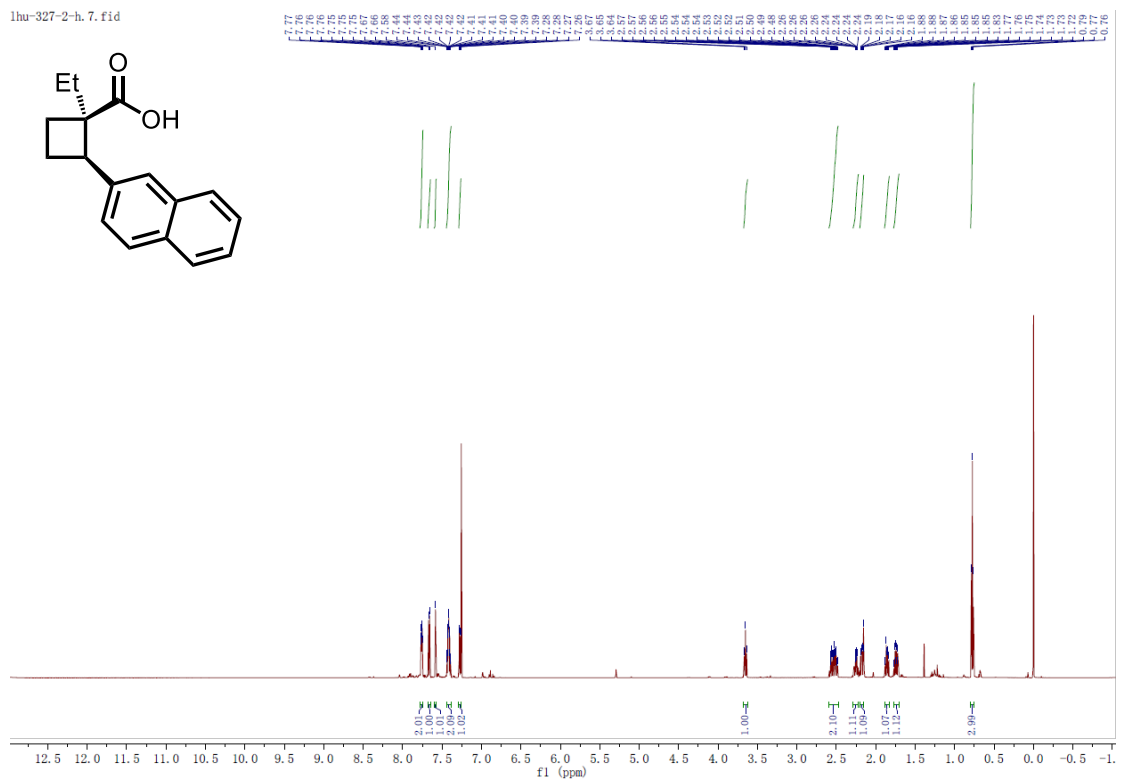

lhu-327-2-c. 8. fid

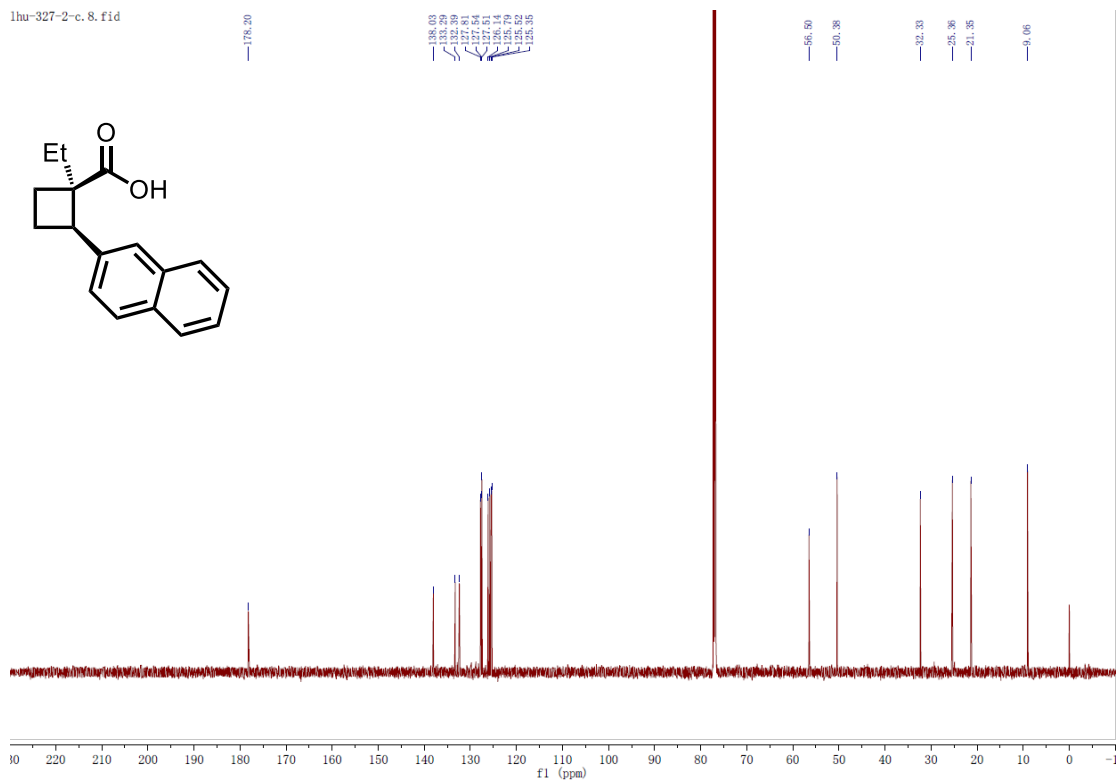

lhu-327-6-h-2.11. fid

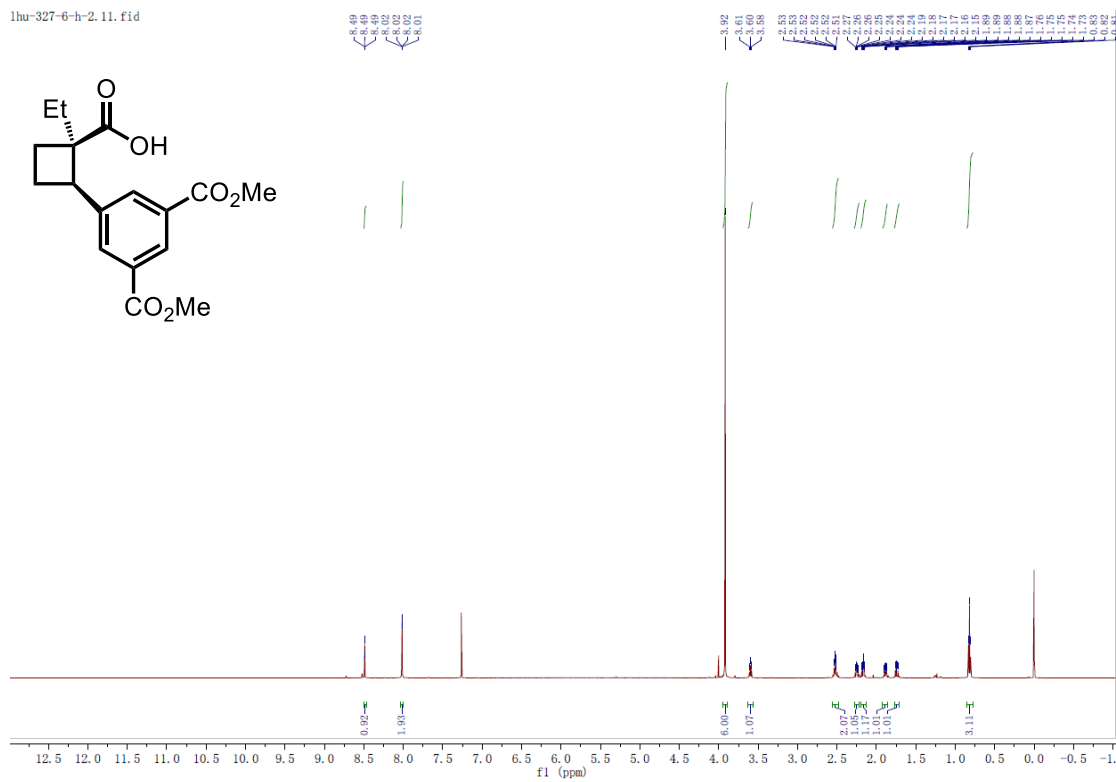

lhu-327-6-c-2.1.fid

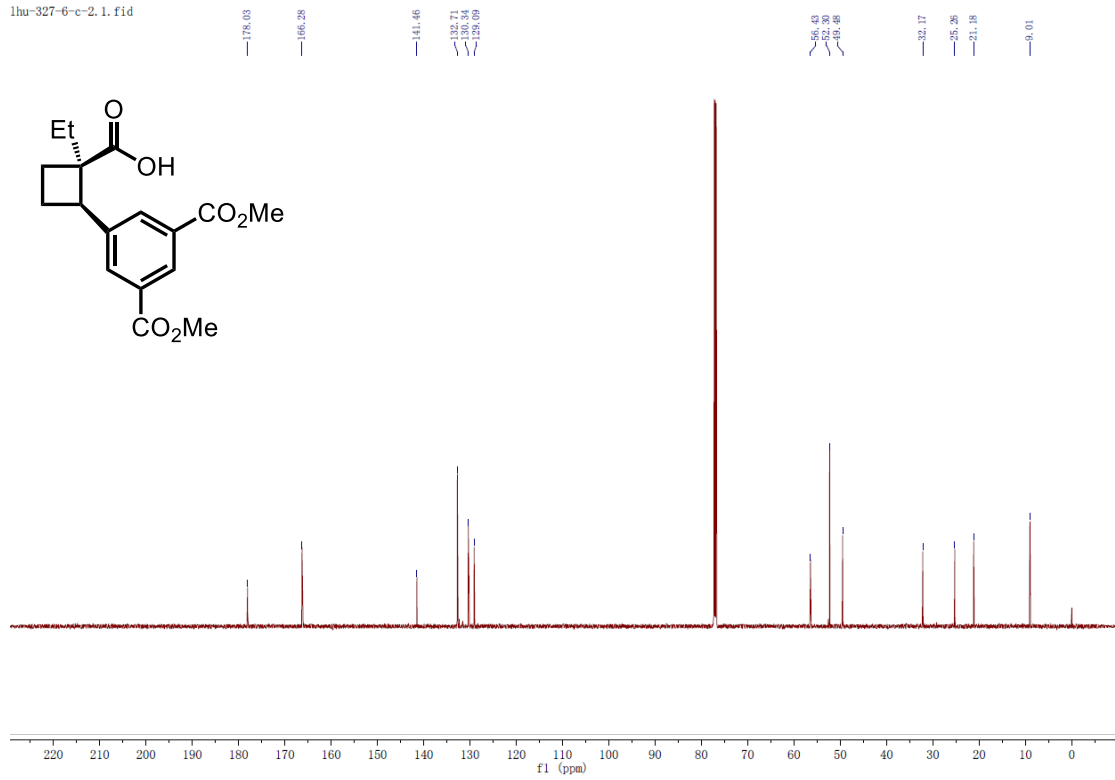

lhu-372-7-h.5.fid

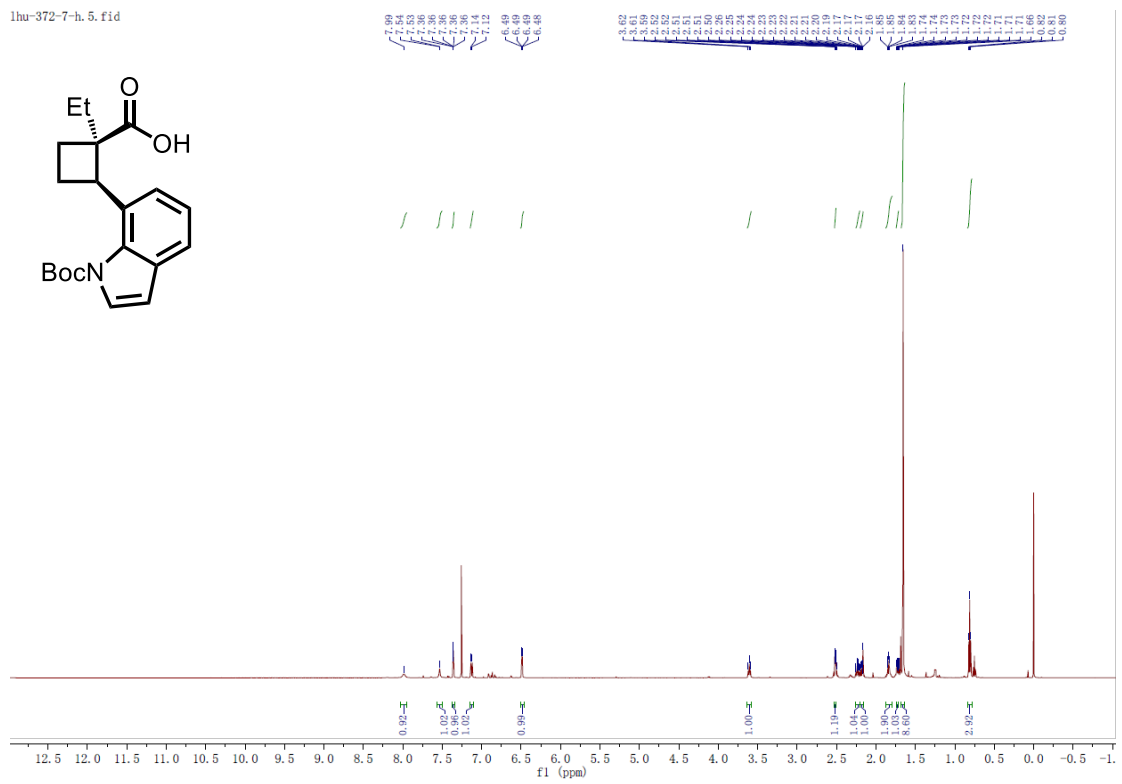

lhu-372-7-c. 6. fid

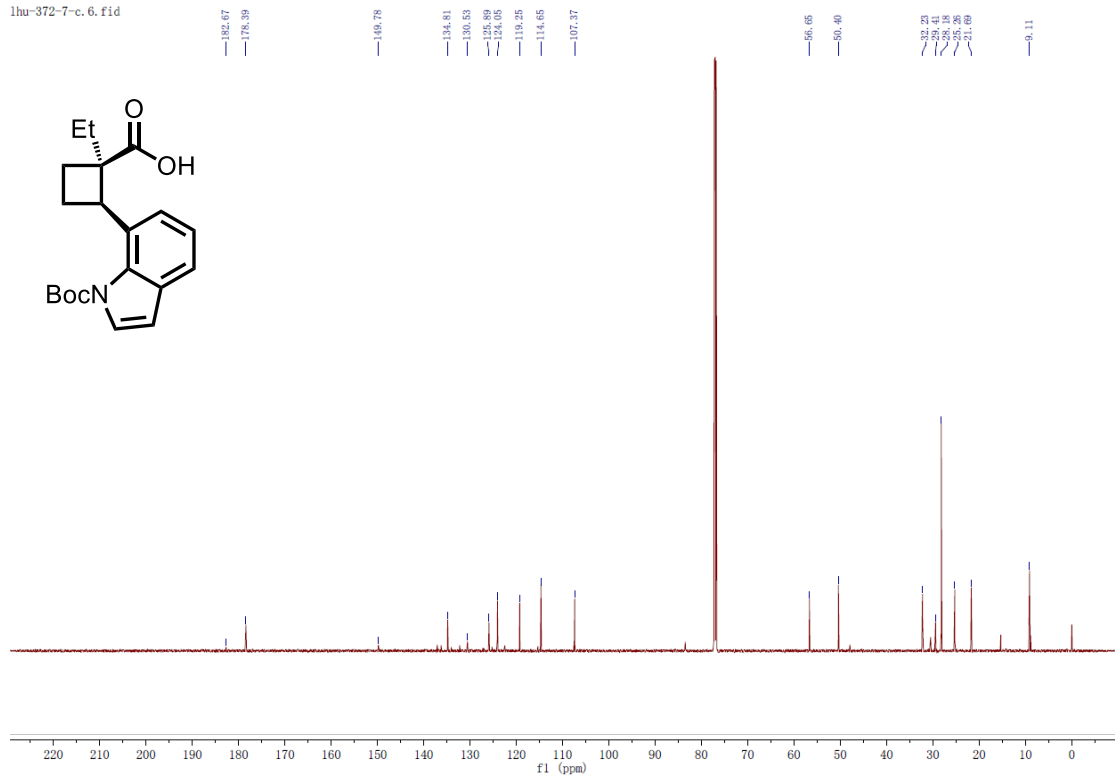

lhu-5p-h. 1. fid

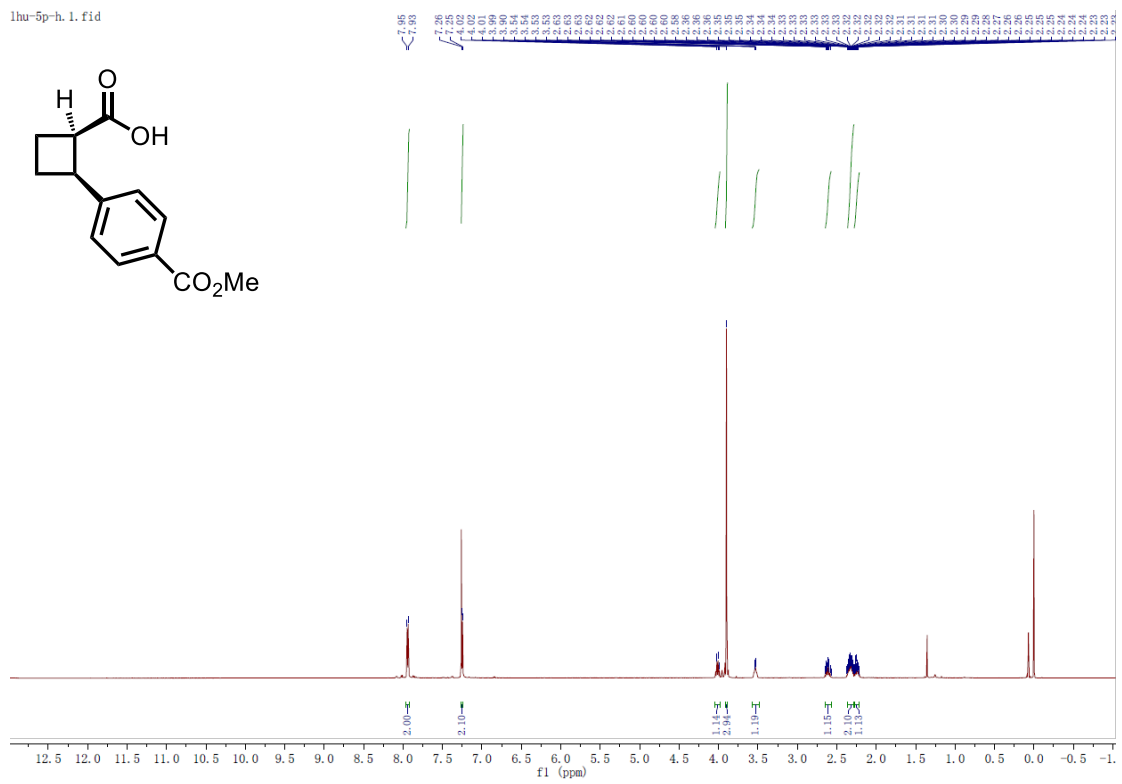

lhu-5p-c. 2. fid

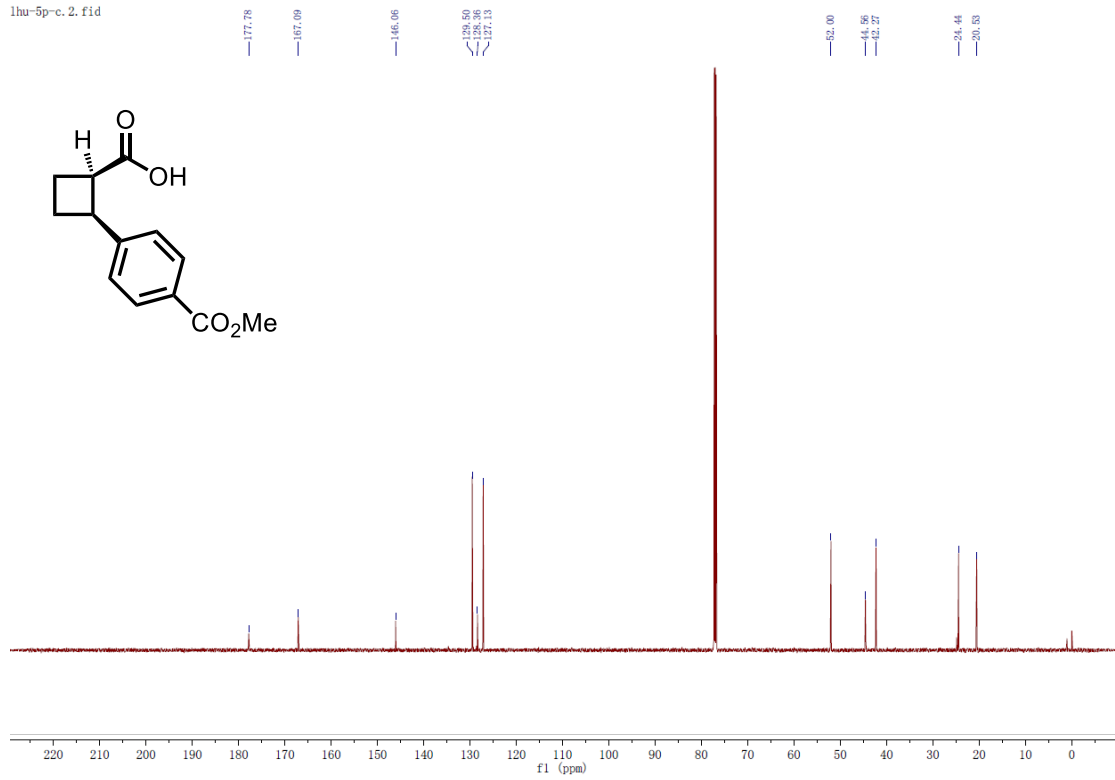

lhu-353-1-h. 5. fid

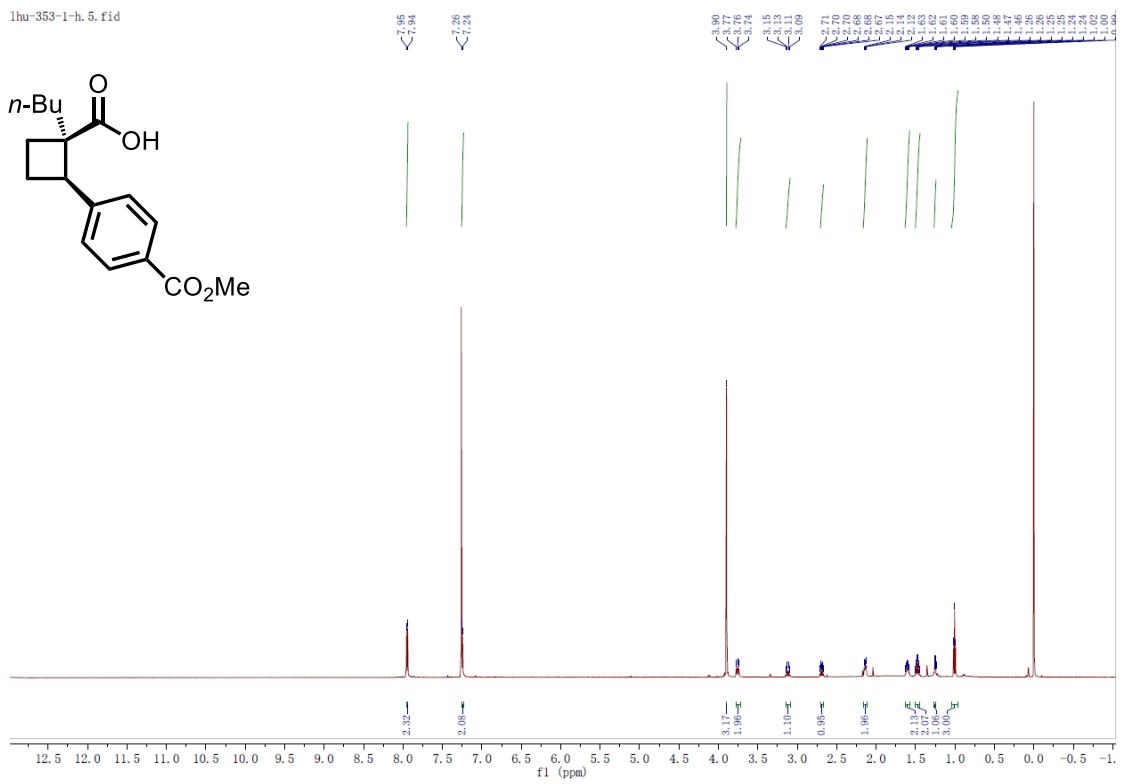

lhu-353-l-c. 6. fid

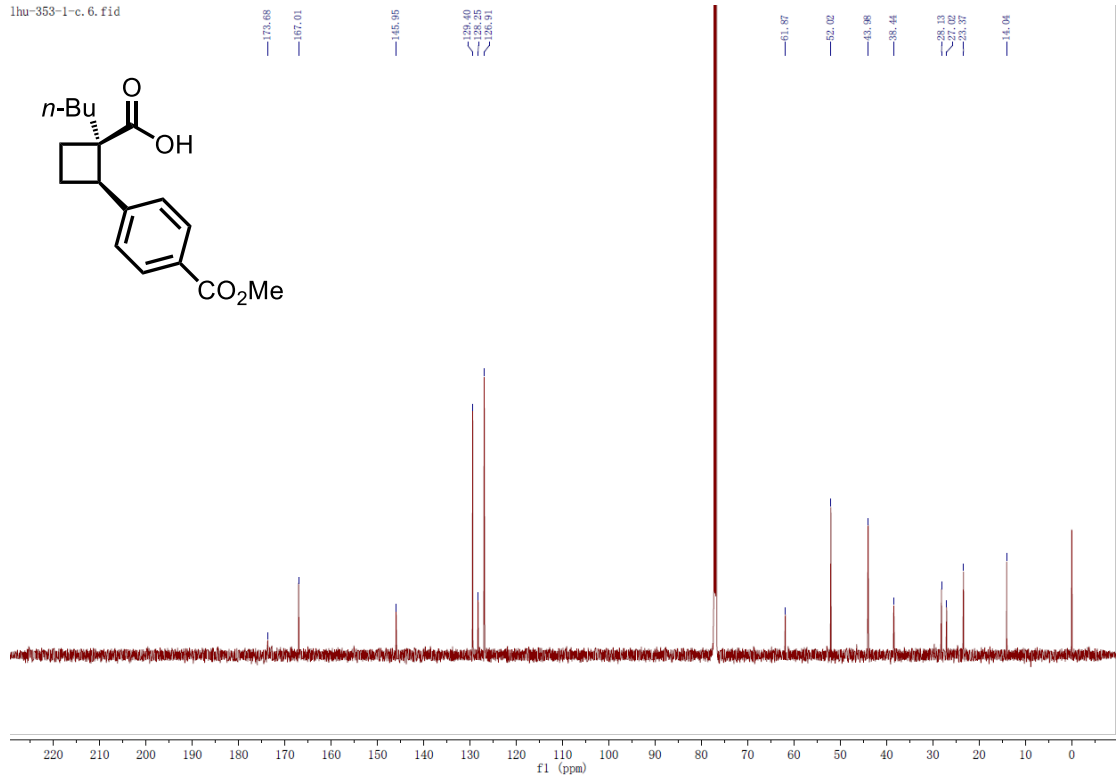

lhu-317-h. 1. fid

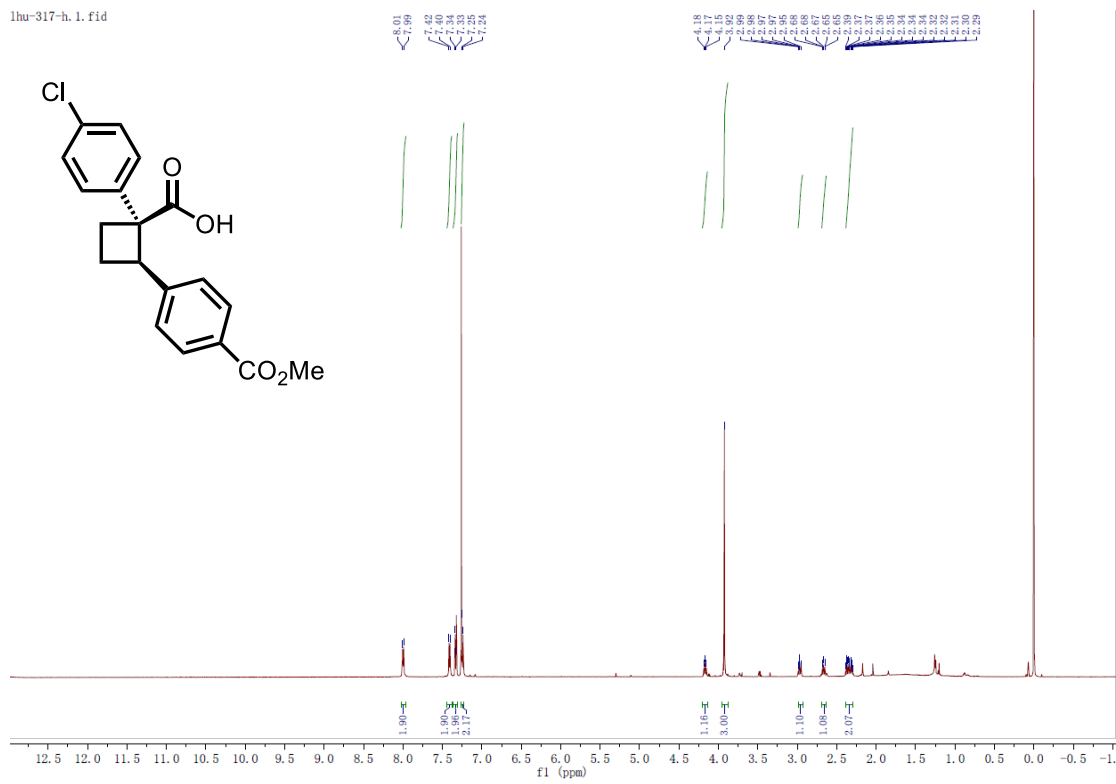

lhu-317-c. 1. fid

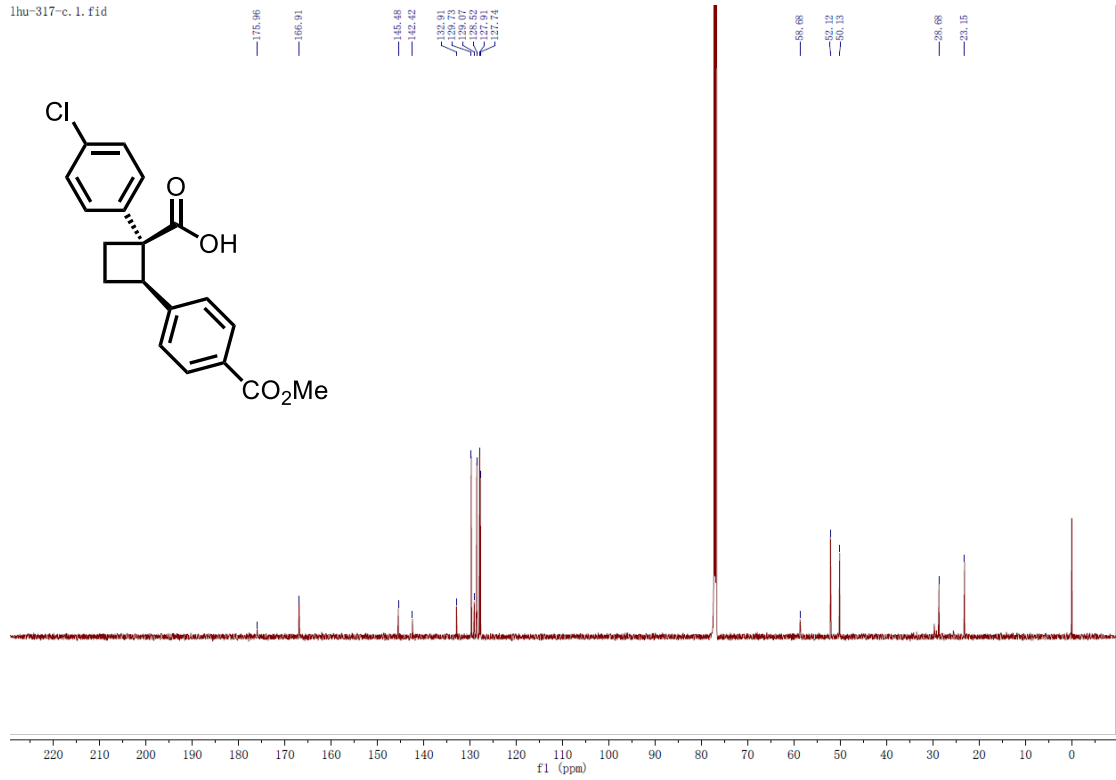

lhu-353-4-h. 11. fid

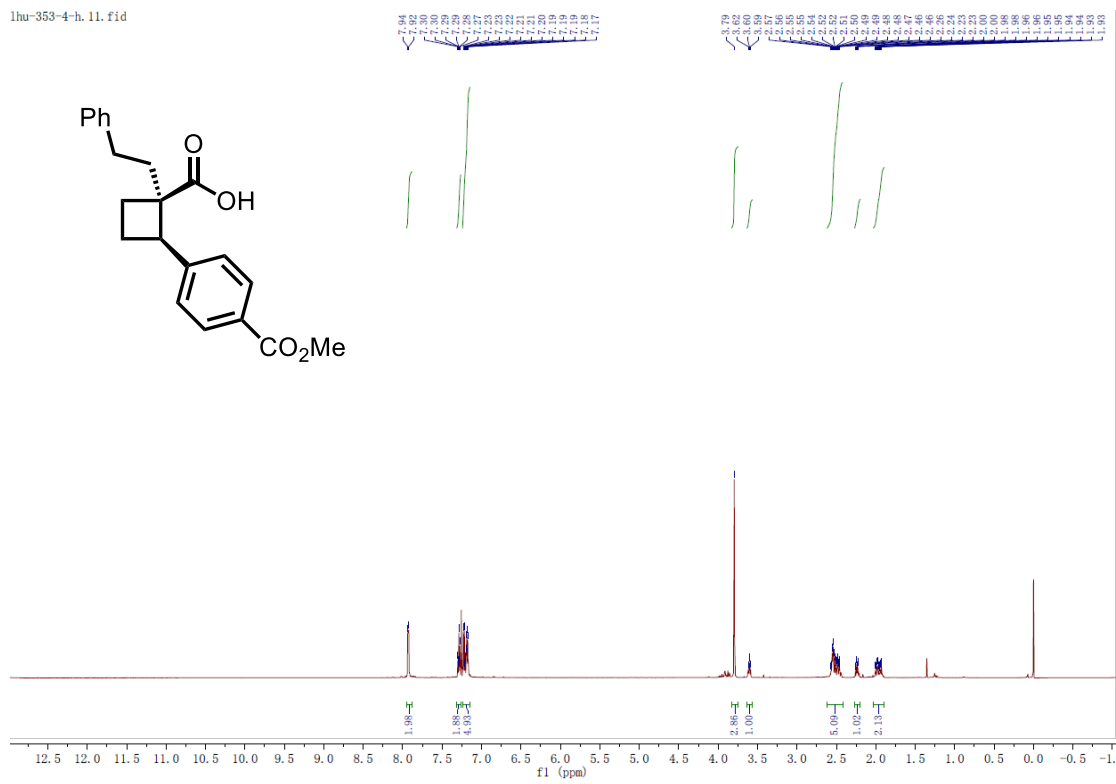



lhu-353-4-c.12.fid

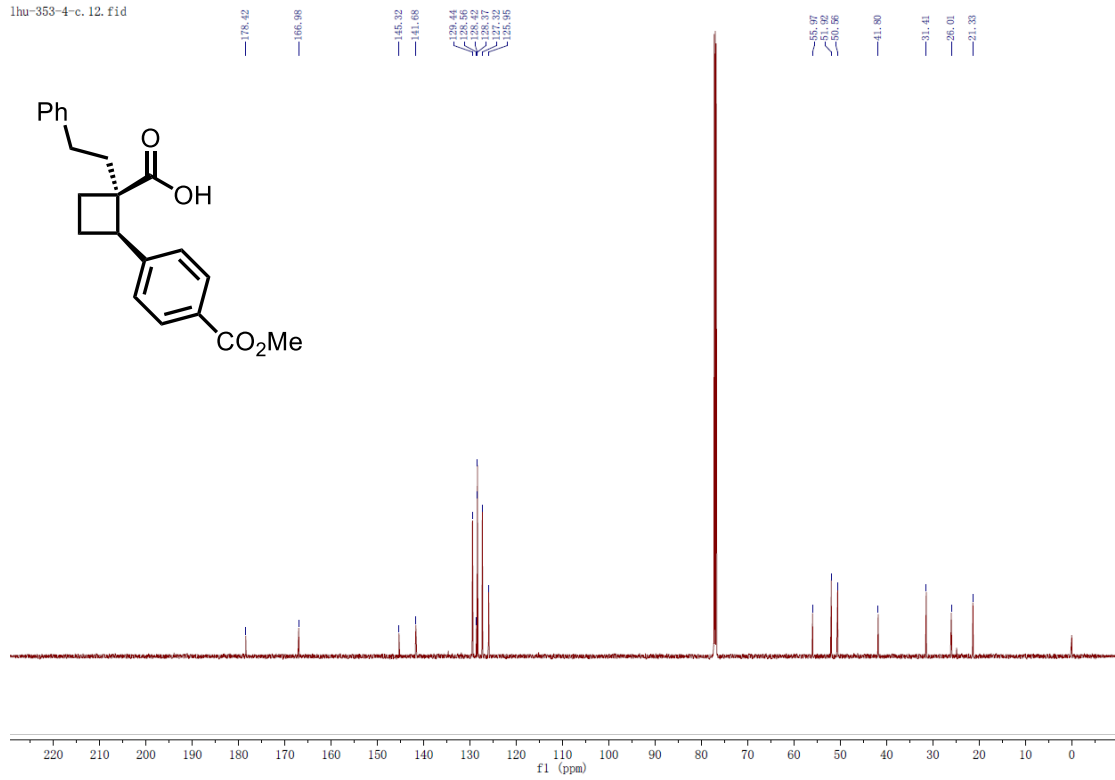

lhu-378-8-h.28.fid

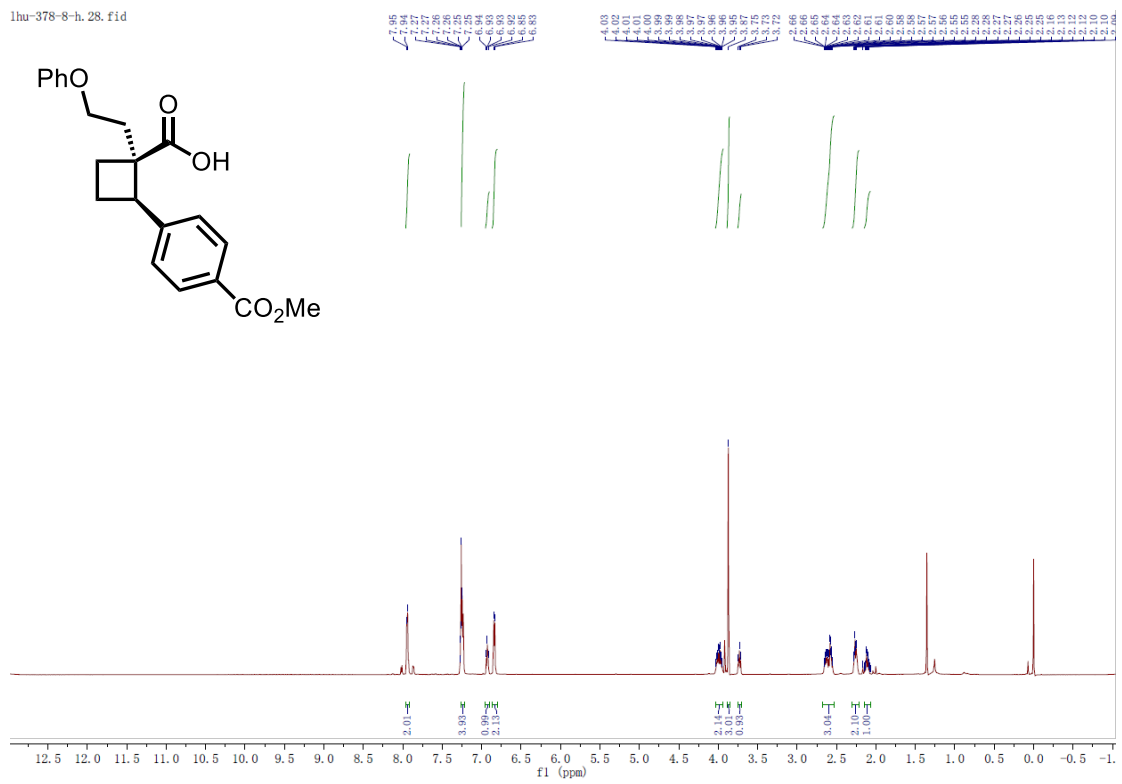

lhu-378-8-c.29.fid

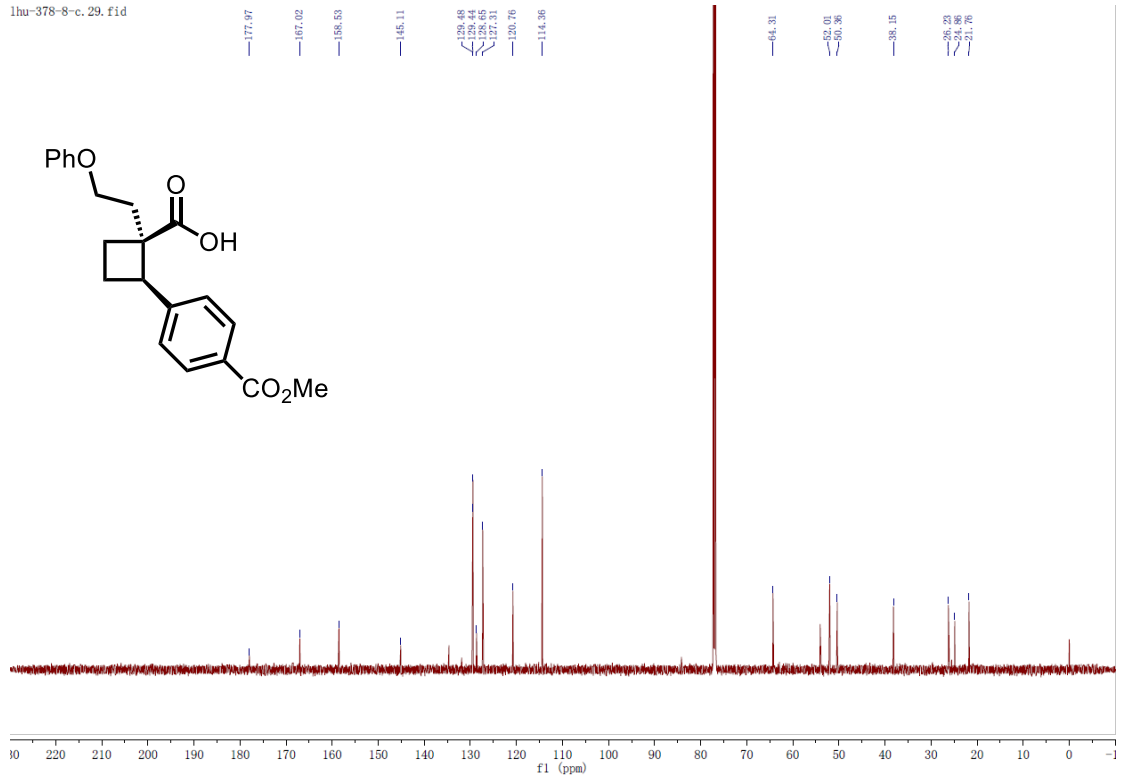

lhu-353-2-h-2.9.fid

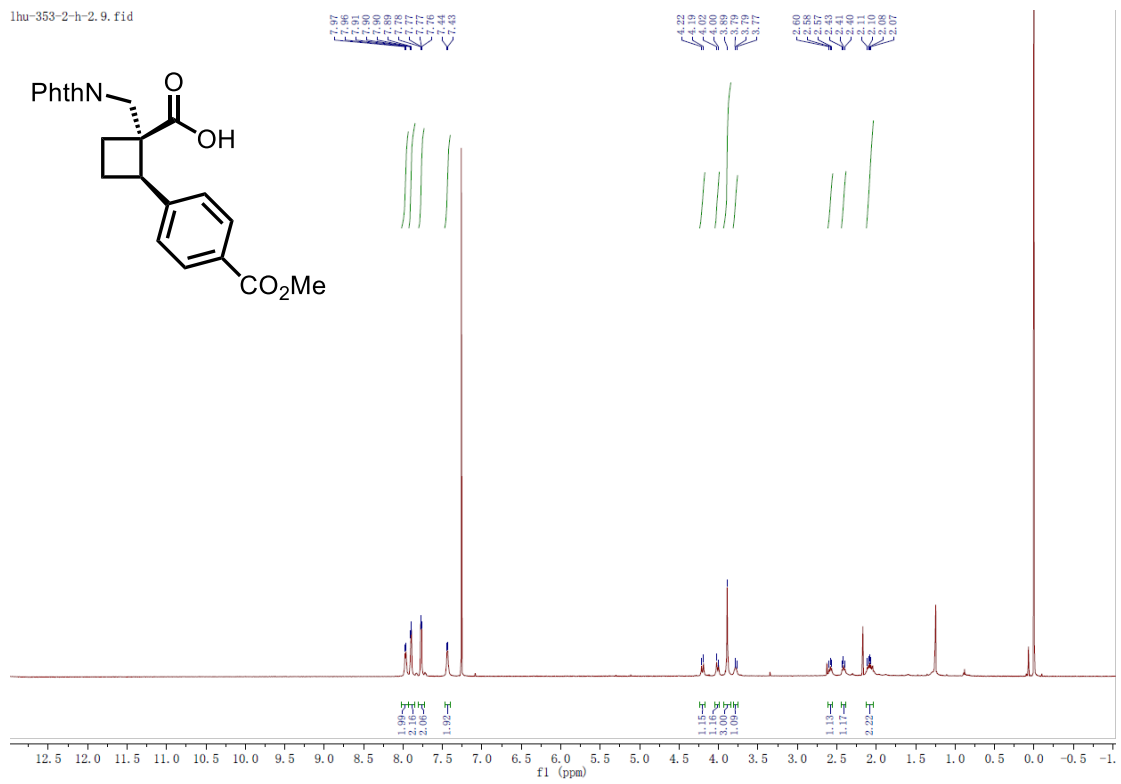

lhu-353-2-c-2.10.fid

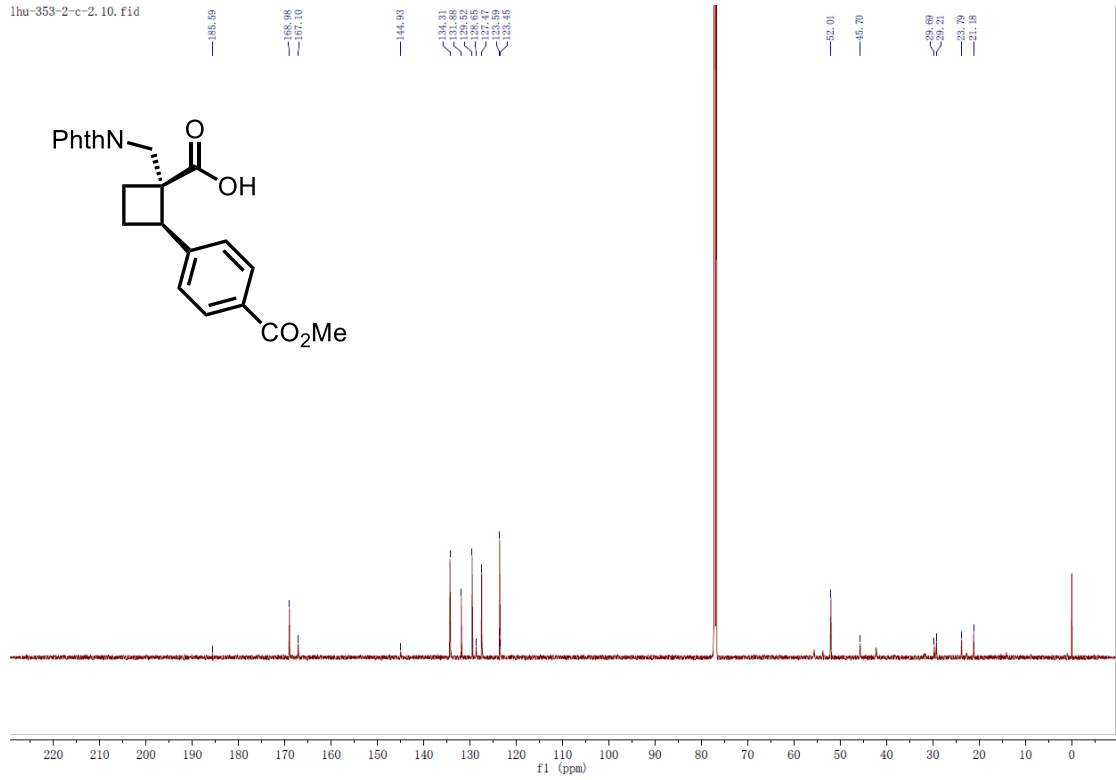

lhu-203-s-h.1.fid

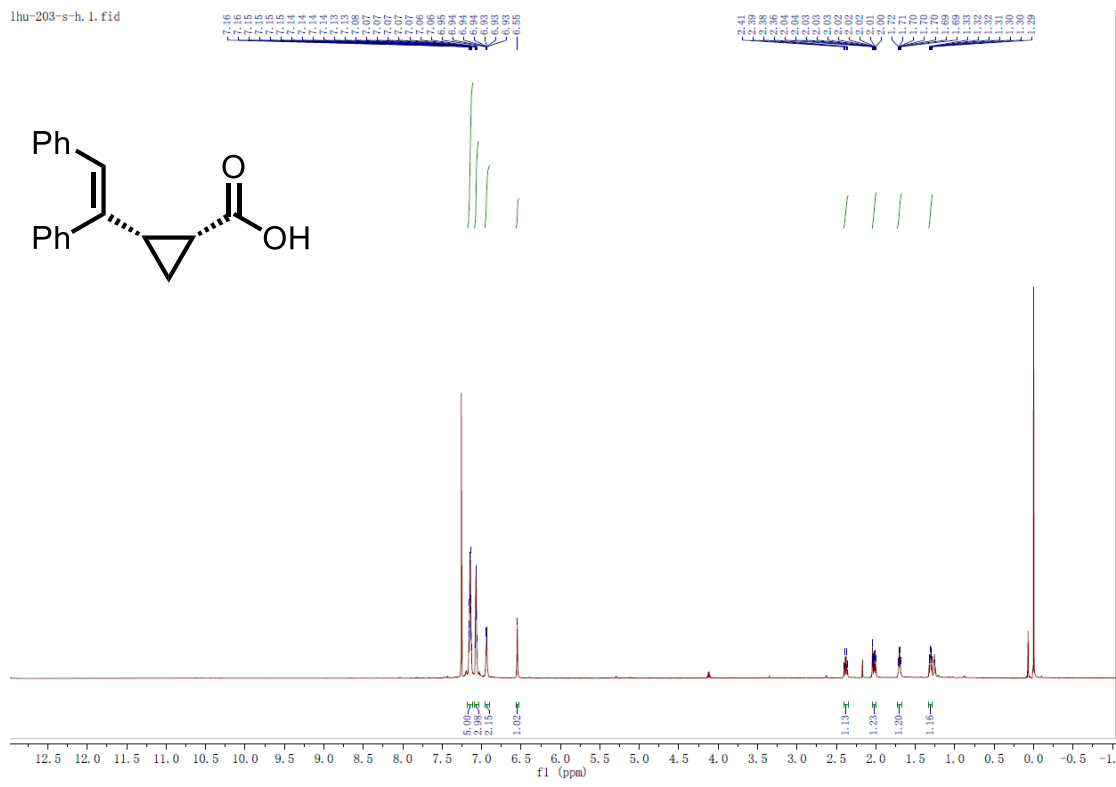

lhu-203-s-c.1.fid

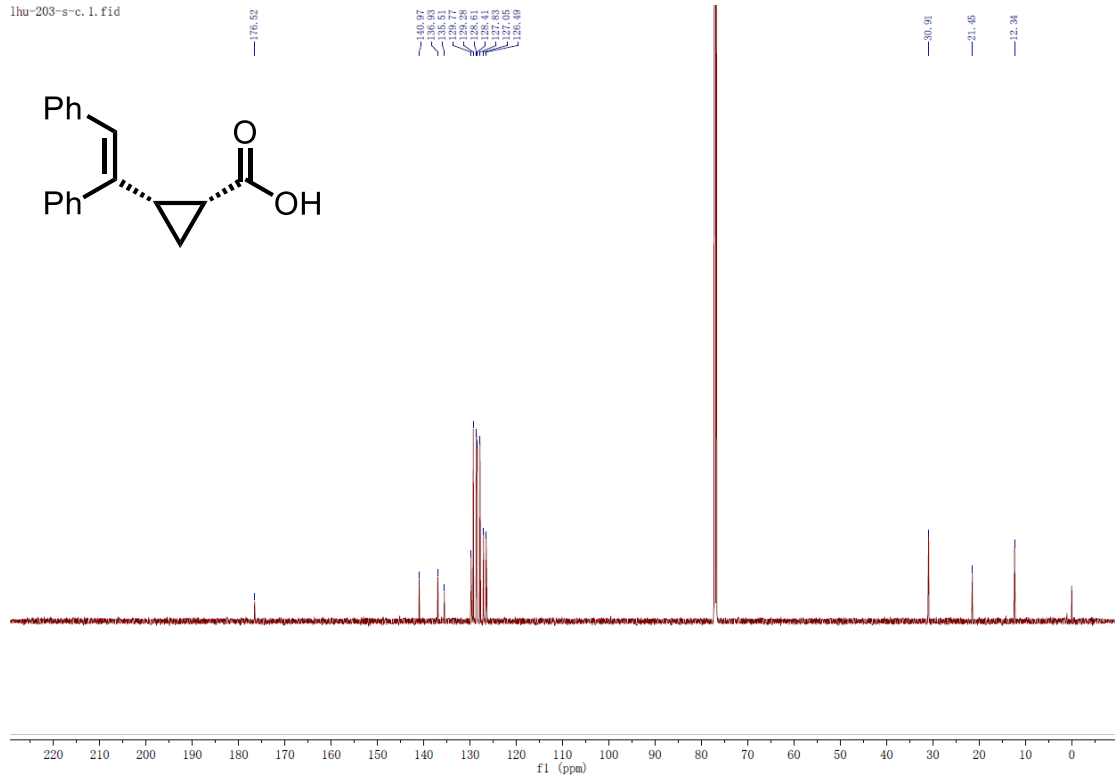

lhu-203-5-h.1.fid

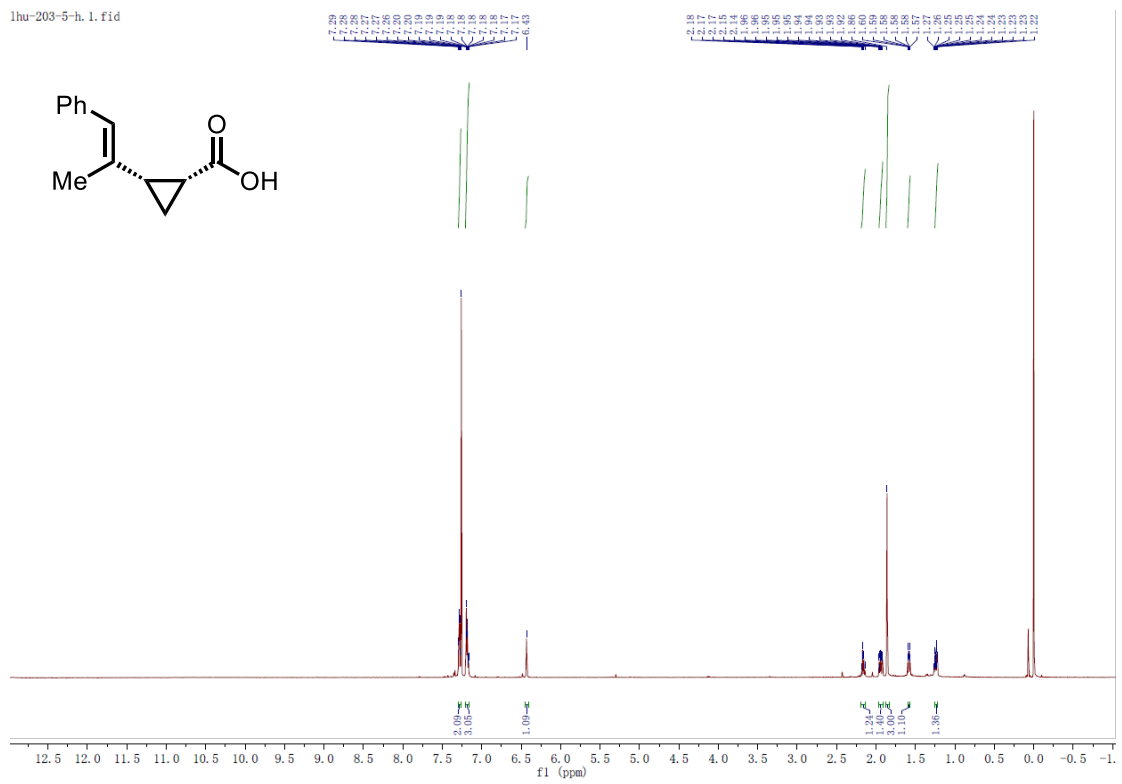



lhu-203-6-h. 1.fid

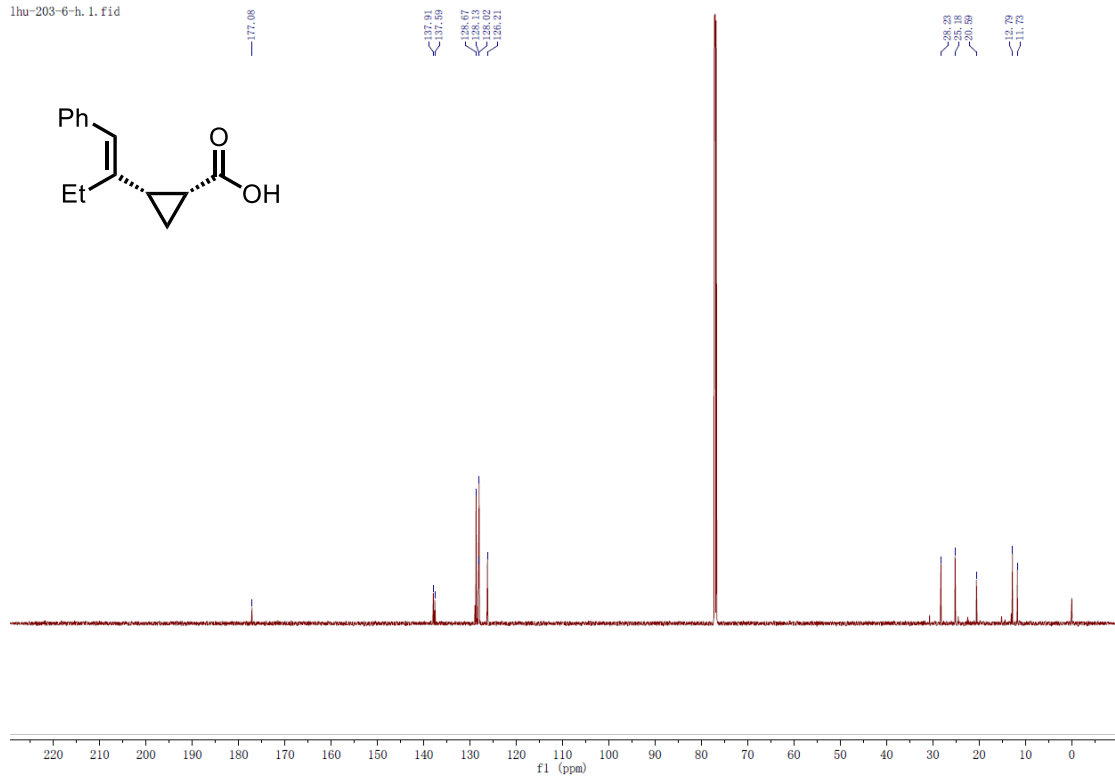

lhu-203-4-h. 1.fid

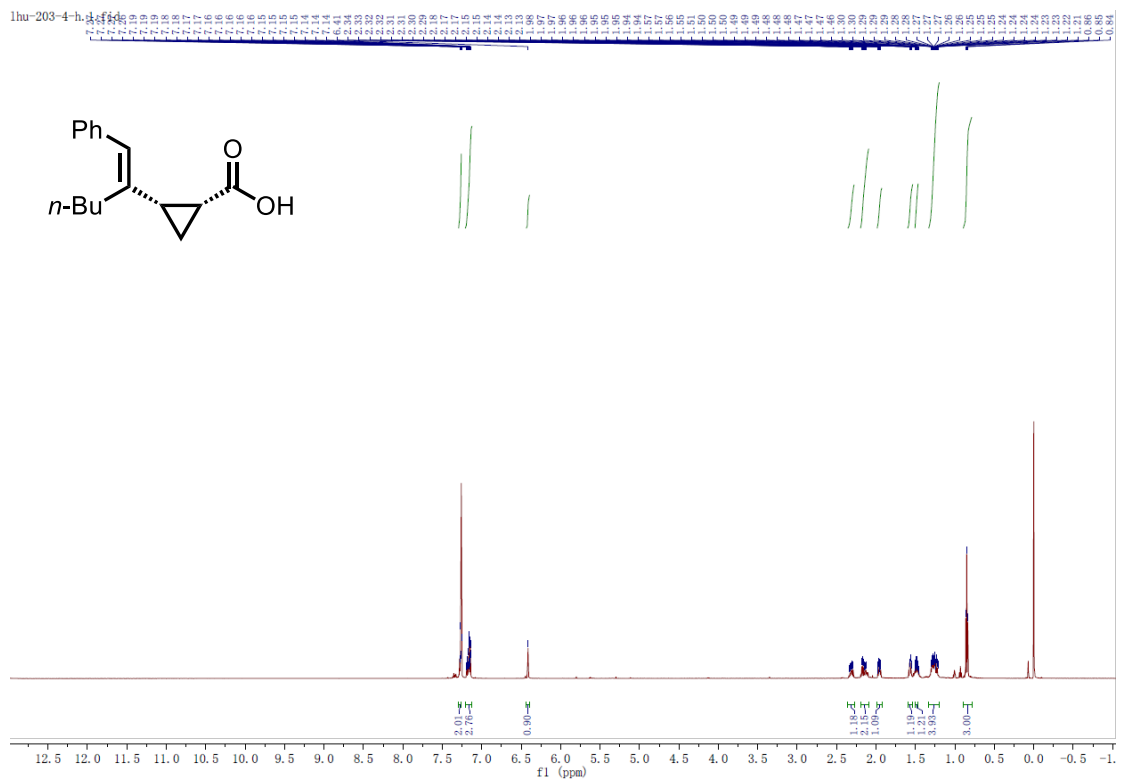

lhu-203-4-c.1.fid

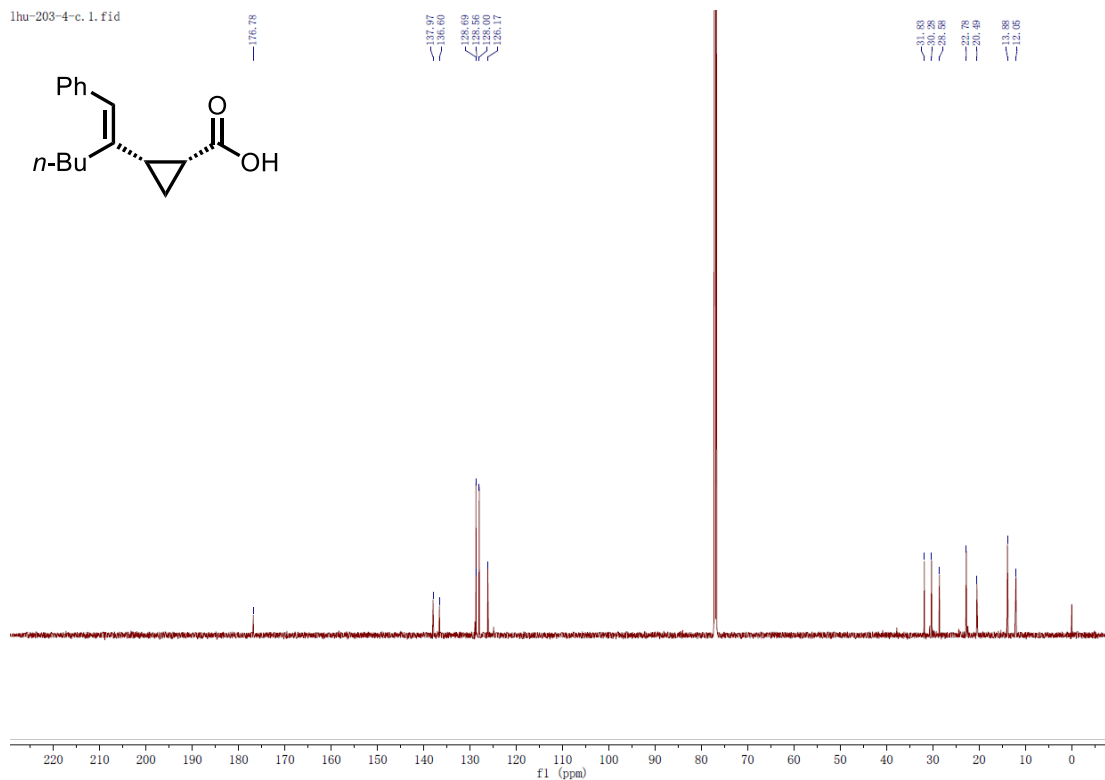

lhu-214-1-h.1.fid

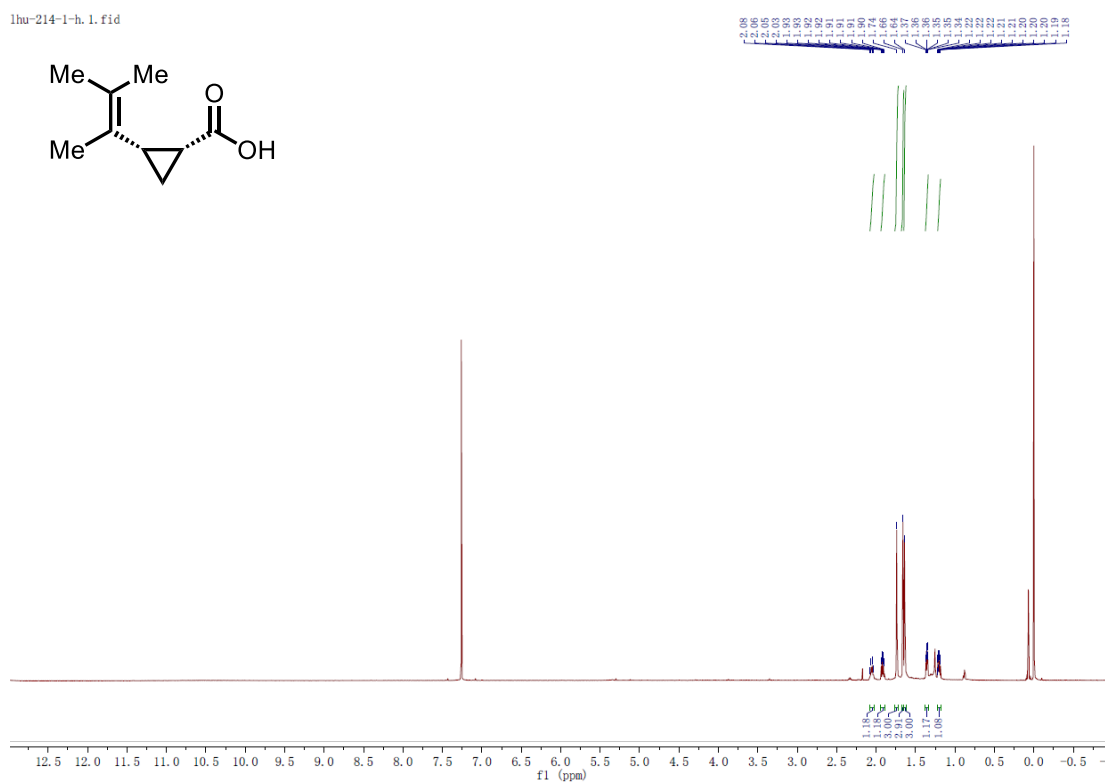

lhu-214-1-c. 1.fid

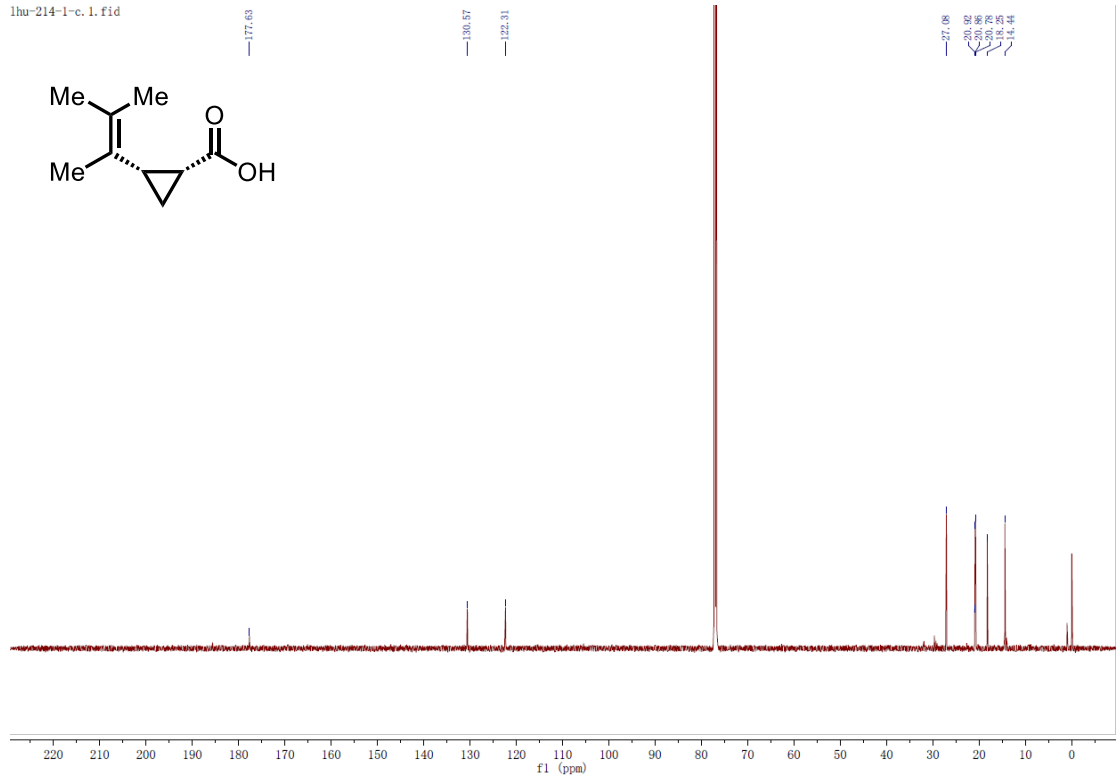

lhu-203-2-h. 1.fid

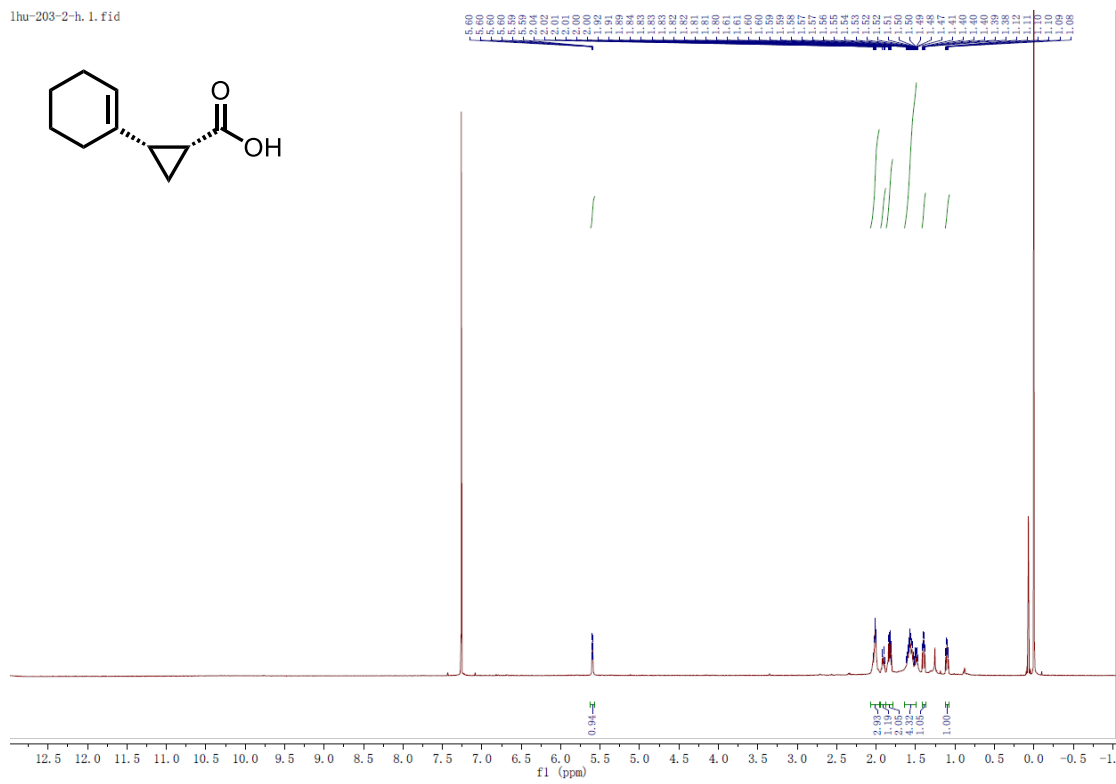



lhu-203-2-c.1.fid

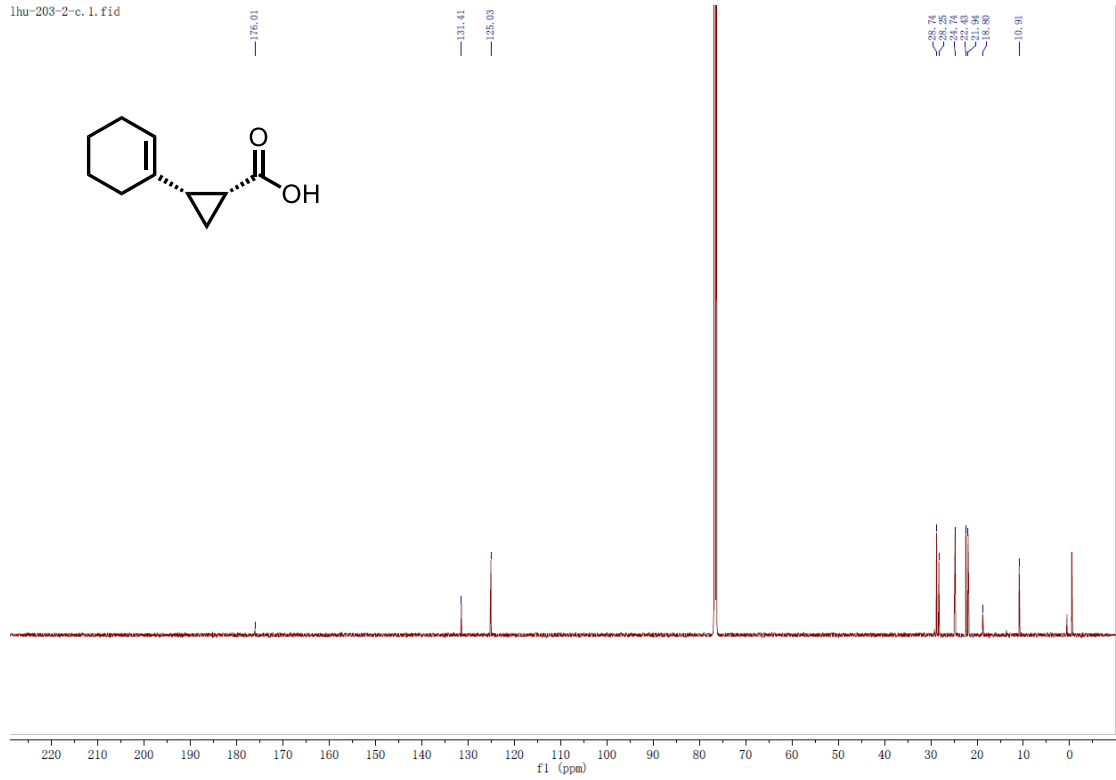

h1-214-4-H-2.1.fid

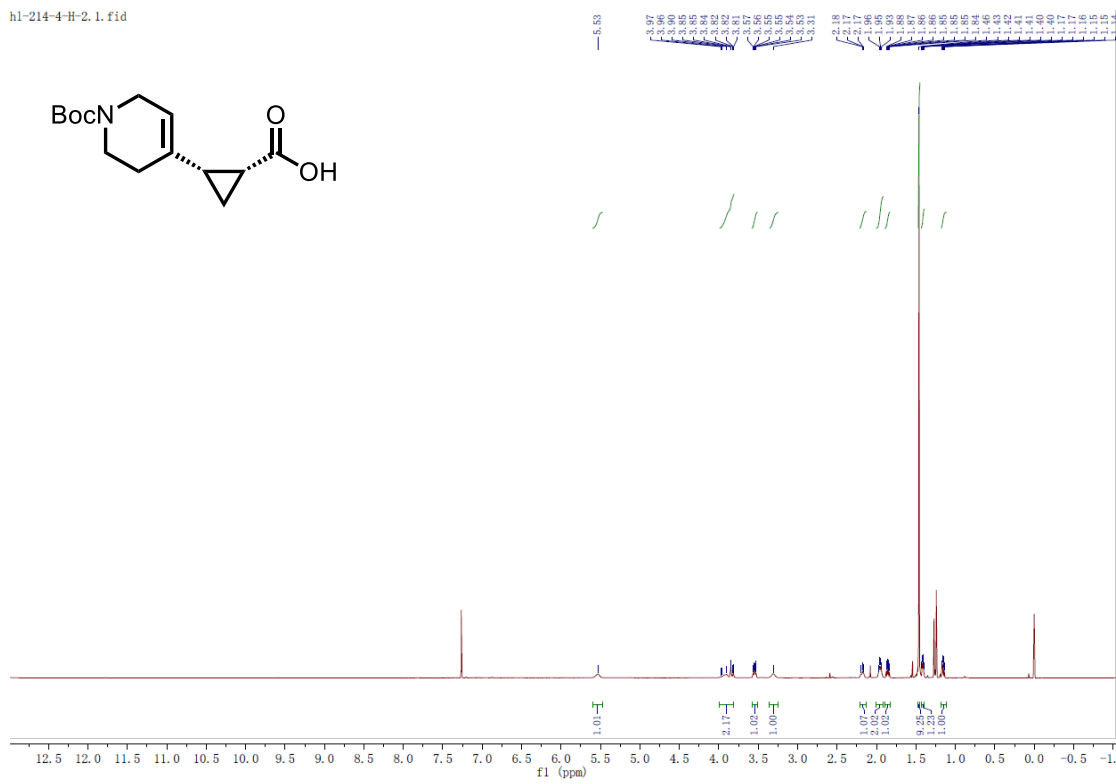

lhu-214-4-c.1.fid

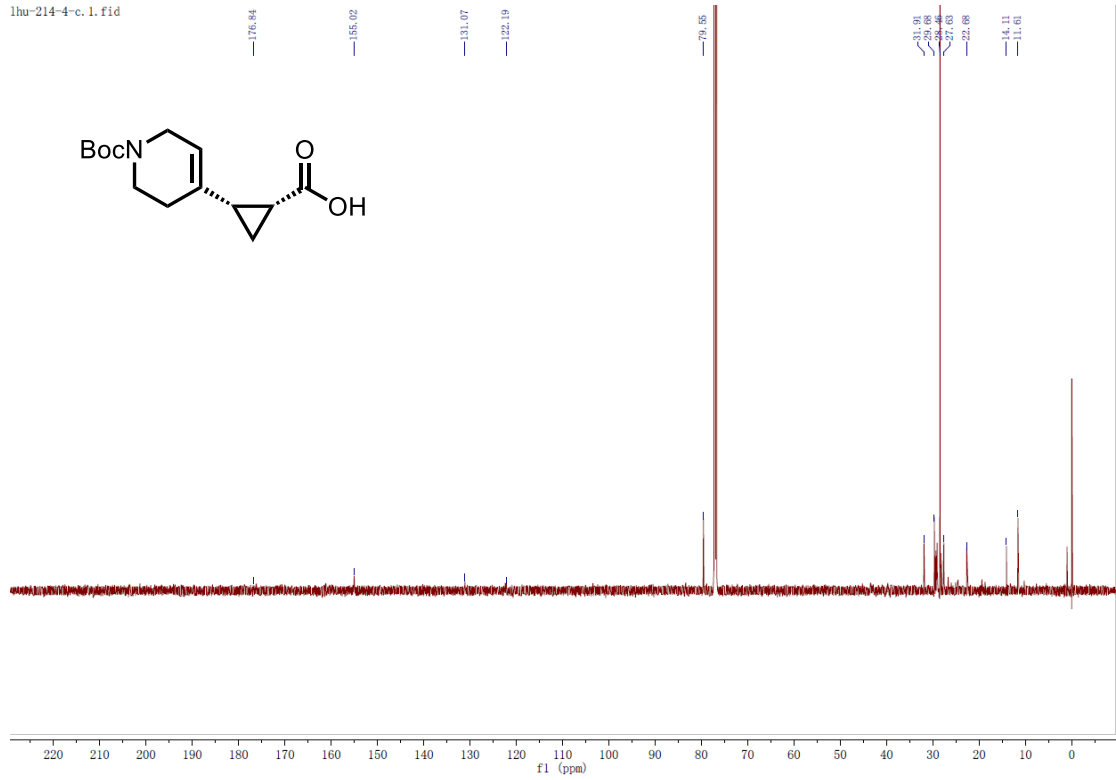

lhu-cycbu-viny...

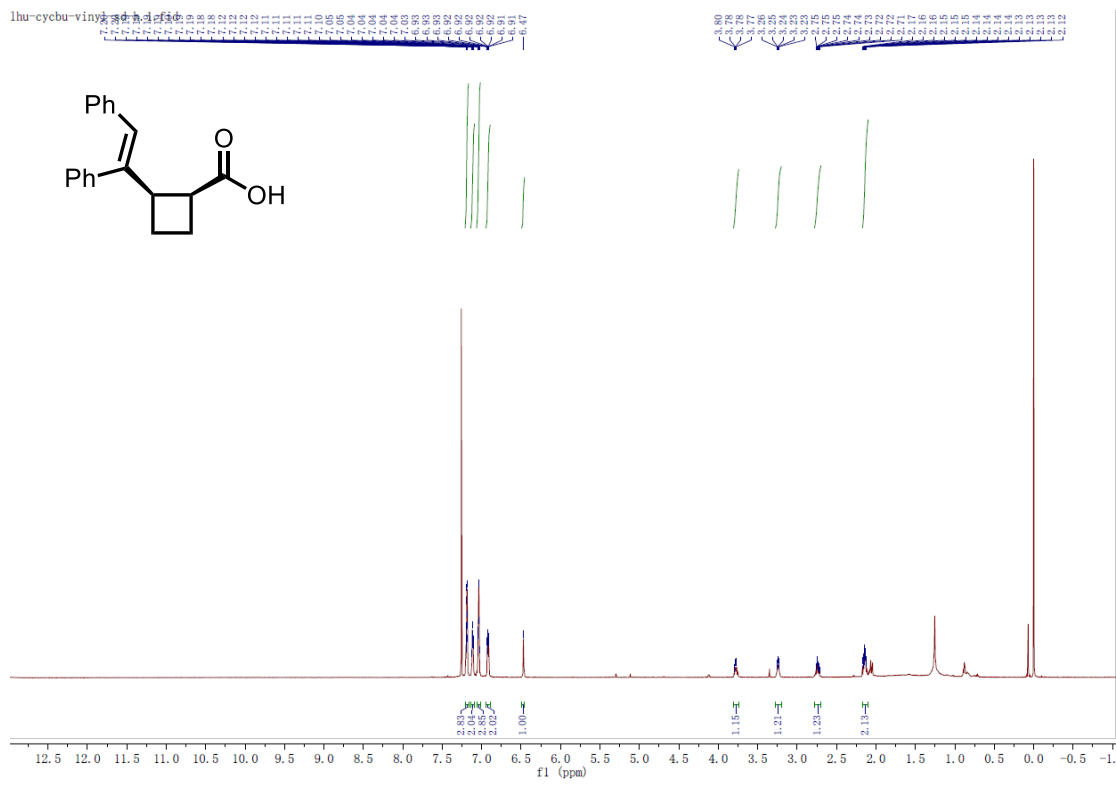

lhu-cycbu-vinyl-sd-c. 1. fid

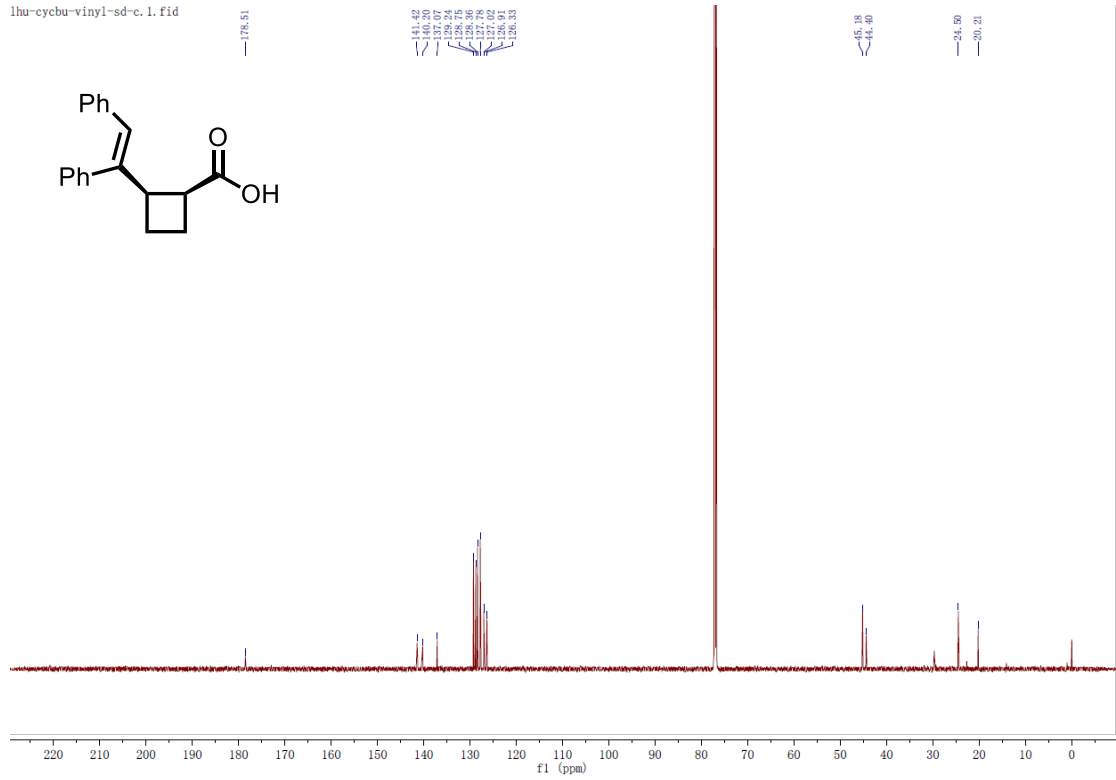

lhu-cf3-h. 19. fid

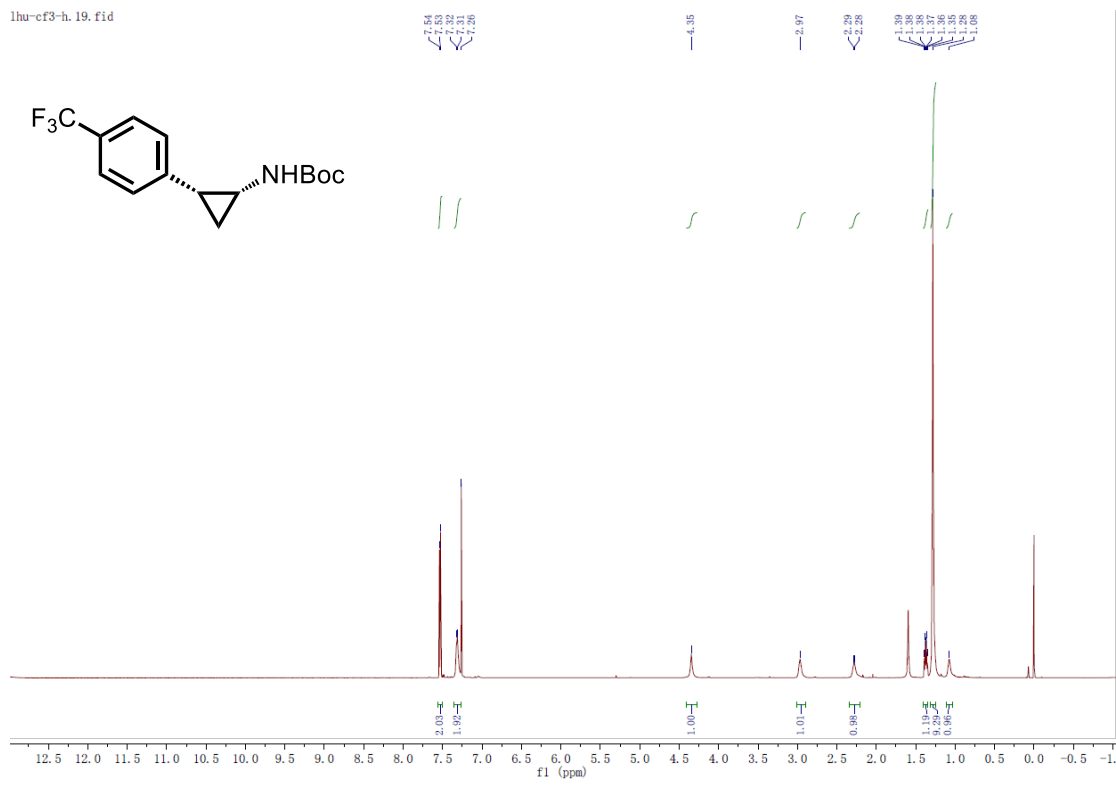

lhu-cf3-c. 20. fid

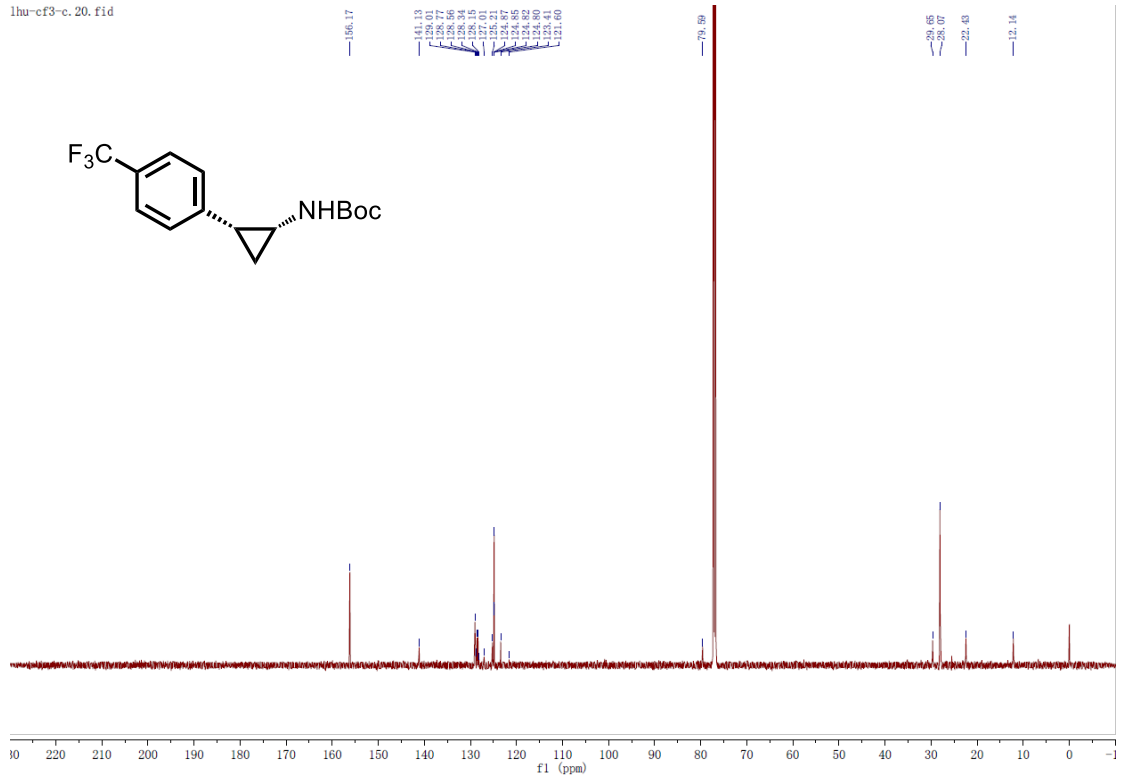

lhu-cf3-f. 14. fid

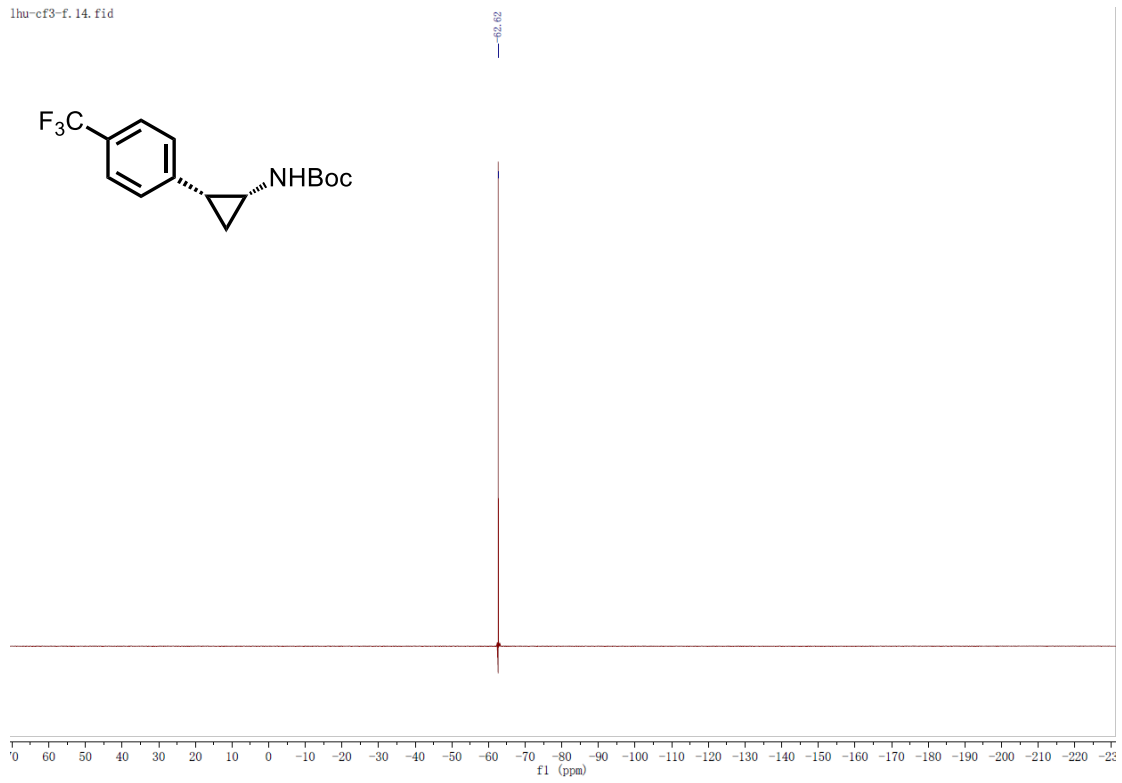

lhu-cf3-h. 3. ser

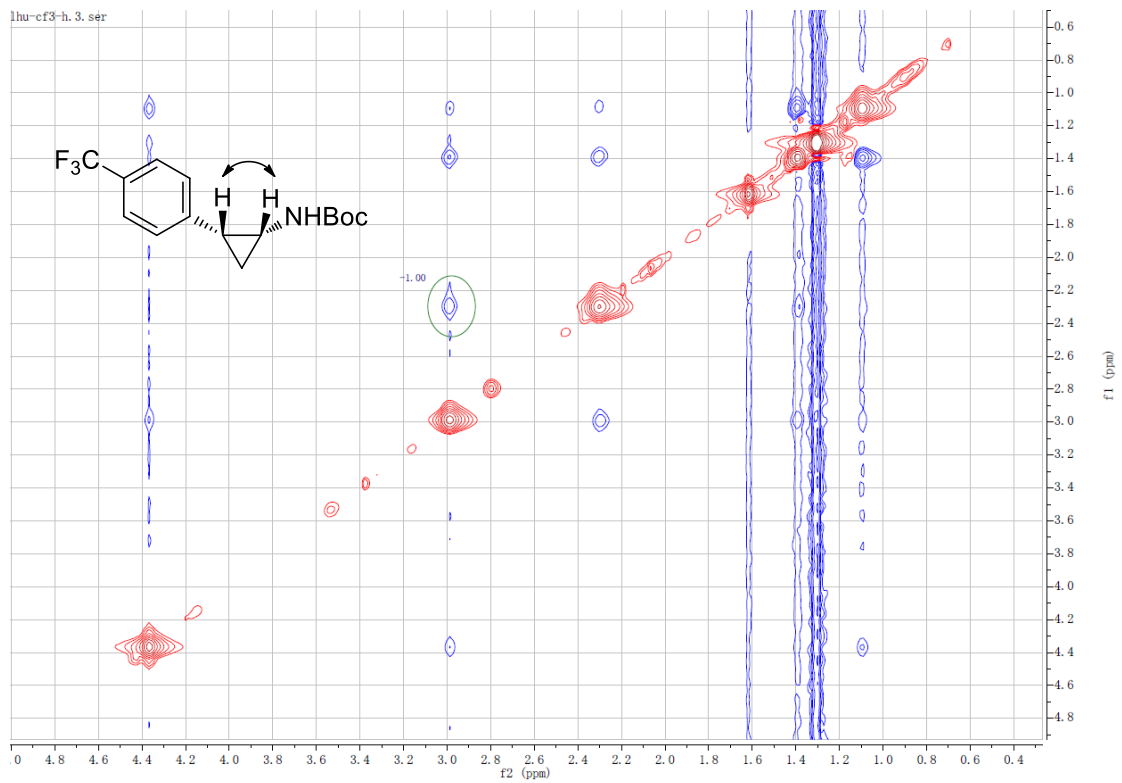

Supplement: NIHMS1035213-supplement-Supp__1.pdf [file NIHMS1035213-supplement-Supp__1.pdf]
